# Supplementary material
Source: publisher figshare collection journal article supplement (https://gsajournals.figshare.com/articles/dataset/_/14179745)
Supplement: Supplementary file 1 [file 1]

## Sheet: A - DE contigs Crem
Supplementary Table S6: Differentially expressed transcripts for A) cryptic Crematogaster species and B) cryptic Camponotus species. Tables show in which cryptic species a transcript was overexpressed, BLAST annotations, DESeq stats and raw counts per individual.
Contig ID	overexpressed in	BLAST annotation	Gene in Drosophila	mean Base	log 2 Fold Change	lfcSE	stat	p value	adjusted p value	59_PAR_Cr_FB2	63_PAR_Cr_FB2	64_PAR_Cr_FB2	69_PAR_Cr_FB2	74_PAR_Cr_FB2	75_PAR_Cr_FB1	76_PAR_Cr_FB2	218_PAT_Cr_FB1	219_PAT_Cr_FB1	222_PAT_Cr_FB2	230_PAT_Cr_FB2	231_PAT_Cr_FB1	232_PAT_Cr_FB1	240_PAT_Cr_FB2	242_PAT_Cr_FB2
CrematogasterSubCLCMeta_s59851	B	PREDICTED: probable cytochrome P450 6a14	NA	130.484	-24.4426	2.19332	-11.1441	7.64963e-29	7.79725e-26	0	0	0	361.168	0	0	619.687	0	0	405.247	18.9084	0	677.014	0	0
CrematogasterSubCLCMeta_s44421	B	PREDICTED: uncharacterized protein LOC105143979 isoform X1	NA	79.1288	-23.7386	3.06065	-7.75608	8.75966e-15	1.72839e-12	529.213	0	0.43939	302.692	4.70528e-05	0	0	109.968	0	0	308.788	0	2.80464e-05	0.0412013	0
CrematogasterSubCLCMeta_s43238	B	PREDICTED: uncharacterized protein LOC105462910	NA	63.901	-23.4437	2.15057	-10.9012	1.13801e-27	1.02865e-24	323.832	0.0748803	0.126709	1.22157	281.119	0.0395643	0.576225	3.68633e-08	0.784389	0.230485	472.315	0.0607023	0.00158973	0.229758	0.0765803
CrematogasterSubCLCMeta_s43969	B	PREDICTED: transcription factor Dp-1	NA	59.7531	-23.3506	3.06074	-7.62906	2.36464e-14	4.24279e-12	284.307	0	0	161.462	1.30689e-07	0	0	0	0	272.578	229.109	0	7.48345e-07	0	0
CrematogasterSubCLCMeta_s59569	B	PREDICTED: putative RNA-binding protein Luc7-like 2	NA	35.6081	-22.6353	3.06098	-7.39477	1.41648e-13	2.33998e-11	0	0	0	0	149.873	0	0	0	0	241.287	0	0	171.032	0	0
CrematogasterSubCLCMeta_rep_c28550	B	PREDICTED: protein FAM98B	NA	34.1121	-22.5759	2.76587	-8.16231	3.28672e-16	8.20088e-14	1.67468e-05	0	9.3668e-06	6.53555e-05	57.9215	0	0	0	0	0	495.009	0	73.6718	2.33052e-06	0
CrematogasterSubCLCMeta_rep_c4171	B	PREDICTED: tetraspanin-33-like	NA	27.4489	-22.2725	2.43675	-9.14025	6.23063e-20	2.78963e-17	3.68991	0	0	0	0	9.03249e-07	39.6915	233.803	122.126	0.00195147	0	0	0	0	0
CrematogasterSubCLCMeta_s44362	B	PREDICTED: probable dolichol-phosphate mannosyltransferase	NA	25.7741	-22.1803	2.76153	-8.03188	9.59937e-16	2.2433e-13	0	0	0	311	32.76	0	0	0	59.4051	0	0	0	0	0	0
CrematogasterSubCLCMeta_s60284	B	PREDICTED: E3 ubiquitin-protein ligase MIB2	NA	20.5913	-21.8723	2.73118	-8.00838	1.16233e-15	2.66429e-13	0	0	0	2.04223e-07	0	0	29.7822	0	0	0	247.35	0	95.659	0	0
CrematogasterSubCLCMeta_s52693	B	PREDICTED: carboxypeptidase D-like	NA	18.8117	-21.746	2.7428	-7.92838	2.22029e-15	4.74854e-13	0	0	0	0	0	0	79	164	0	25	0	0	0	0	0
CrematogasterSubCLCMeta_s44021	B	PREDICTED: mothers against decapentaplegic homolog 3	NA	30.2157	-21.6315	2.75604	-7.84874	4.20231e-15	8.75304e-13	42.8529	0.00984769	0.00987547	327.227	0.00983586	0.00312965	0.000162926	0.00309243	0.00986296	0.00986662	116.409	0.00982276	0.00979048	0.00607837	0.120062
CrematogasterSubCLCMeta_rep_c13207	B	PREDICTED: carboxypeptidase B-like	NA	13.3501	-21.2671	3.06199	-6.94551	3.77088e-12	4.96295e-10	201	0	0	0	0	0	0	1	0	0	0	0	564	0	0
CrematogasterSubCLCMeta_s46995	B	NADH dehydrogenase subunit 5 (mitochondrion)	NA	4414.63	-14.3772	1.0578	-13.5916	4.4898e-42	1.19496e-38	8173.29	0	2.12471	1398.52	10329.8	0	5969.28	12196.2	9379.24	9378.73	1169.99	0	10352.7	0	0
CrematogasterSubCLCMeta_rep_c31949	B	PREDICTED: elongation factor Tu, mitochondrial isoform X1	NA	1047.72	-13.264	2.02041	-6.56501	5.20289e-11	5.62652e-09	2818.01	0	0	567.953	922.014	0	4333.28	0	4892.18	0	0	0	3457.06	0	0
CrematogasterSubCLCMeta_s43217	B	PREDICTED: protein sel-1 homolog 1	NA	811.032	-12.8946	1.04095	-12.3873	3.0622e-35	4.89003e-32	1989.88	0	0	1655.82	608.211	0.0897974	2194.41	1844.64	1218.6	2067.93	274.897	0	559.984	0	0
CrematogasterSubCLCMeta_s54228	B	PREDICTED: insulin-like growth factor-binding protein complex acid labile subunit	NA	800.865	-12.8764	1.37548	-9.36139	7.86968e-21	3.92722e-18	1242.66	0	0	2161.19	968.953	0	0	1781.85	1581.25	1011.59	3878.54	0	308.197	0	0
CrematogasterSubCLCMeta_s43386	B	PREDICTED: mitochondrial coenzyme A transporter SLC25A42	NA	798.451	-12.872	0.954977	-13.4789	2.08192e-41	5.24939e-38	1491.88	0	0	810.085	1402.75	0	1454.22	2101.3	468.101	1186.64	2494.47	0	1248.53	0	0
CrematogasterSubCLCMeta_s54275	B	PREDICTED: minor histocompatibility antigen H13	NA	2728.77	-12.4208	0.759154	-16.3614	3.60654e-60	1.91976e-56	6230.87	4.7084	0	4881.64	4630.16	0.0396403	4624.74	5818.41	4498.29	4091.96	3059.78	0	4835.01	0	0
CrematogasterSubCLCMeta_rep_c3371	B	PREDICTED: ceramide synthase 6	NA	475.07	-12.123	0.966849	-12.5387	4.58587e-36	8.13686e-33	355.269	0	0	647.369	435.756	0	369.839	989.211	1189.39	988	1127.03	0	1503.9	0	8.66229e-06
CrematogasterSubCLCMeta_s54211	B	NA	NA	431.774	-11.9851	1.29448	-9.25861	2.07103e-20	9.54009e-18	1164.27	0	0	943.442	791.37	0	660.559	0	718.084	1258.6	807.365	0	555.607	0	0
CrematogasterSubCLCMeta_rep_c12632	B	PREDICTED: elongation of very long chain fatty acids protein AAEL008004-like isoform X2	uncharacterized protein Dmel_CG30008 [Drosophila melanogaster] Dembeck FA Elongase	7187.44	-11.4899	1.23091	-9.33445	1.01513e-20	4.91233e-18	8681.7	1.12393	2.21582	42391.9	11.3456	7.16977	1812.49	23372.8	21601.9	10572	26.3655	2.19712	5.6182	9.64366	4.23018
CrematogasterSubCLCMeta_s43914	B	PREDICTED: eukaryotic peptide chain release factor GTP-binding subunit ERF3A	NA	270.488	-11.3105	1.29889	-8.7078	3.09831e-18	1.04529e-15	695.472	0	0	285.737	552.33	0	213.741	375.739	433.405	0	1163.25	0	732.873	0	0
CrematogasterSubCLCMeta_rep_c24333	B	PREDICTED: protein wings apart-like	NA	224.858	-11.0439	1.63195	-6.7673	1.3121e-11	1.59136e-09	135.524	0	0	83.7169	750.18	2.70659e-06	0	0	628.379	377.936	1394.34	0	462.564	0.0006643	0
CrematogasterSubCLCMeta_s44043	B	PREDICTED: NAD kinase 2, mitochondrial	NA	218.113	-10.9998	0.887704	-12.3913	2.9124e-35	4.81118e-32	493.593	0	0	275.983	279.906	0	324.259	432.756	442.874	310.811	478.146	0	425.07	0	0
CrematogasterSubCLCMeta_s52635	B	PREDICTED: ejaculatory bulb-specific protein 3-like	NA	4653	-10.9791	1.1648	-9.42573	4.27138e-21	2.15399e-18	3679	0	6	18470.3	4733.8	0	10065	26525.9	307	7	163	7	4902.8	4	8
CrematogasterSubCLCMeta_s52972	B	PREDICTED: RNA-binding protein 28-like	NA	214.195	-10.9739	1.30549	-8.40596	4.2439e-17	1.22477e-14	262.514	0	0	0	345	0	207.616	290.352	349.559	320.704	1401.89	0	411.362	0	0
CrematogasterSubCLCMeta_s54173	B	PREDICTED: importin-13	NA	200.325	-10.8769	0.948526	-11.4672	1.92839e-30	2.25325e-27	367.209	0	0	170.257	398.318	0	183.818	505.455	303.751	557.735	285.065	0	348.243	0	0
CrematogasterSubCLCMeta_s27381	B	PREDICTED: transferrin	NA	8049.1	-10.7823	0.890672	-12.1058	9.83605e-34	1.42793e-30	17096.7	0	10.29	508.778	3234.2	0	42201.6	19492.1	14045.1	2337.75	10568	17.7298	17610.8	10.9303	10.243
CrematogasterSubCLCMeta_rep_c34467	B	PREDICTED: putative tRNA (cytidine(32)/guanosine(34)-2'-O)-methyltransferase	NA	177.872	-10.7056	1.25728	-8.51493	1.66693e-17	5.05428e-15	318.151	0	0	349.035	328.799	0	302	297.175	296.819	438	0	0	433.509	0	0
CrematogasterSubCLCMeta_s54334	B	PREDICTED: 40S ribosomal protein S23	NA	807.464	-10.7032	1.6396	-6.52793	6.66844e-11	7.05221e-09	1594.92	0.0668415	0.0530814	1806.88	0.124215	4.72003	576.506	263.14	3340.11	2658.73	2824.06	0.181722	0.000746007	0.000303096	0.00873027
CrematogasterSubCLCMeta_s52234	B	PREDICTED: matrix metalloproteinase-14 isoform X3	NA	172.084	-10.6579	1.44218	-7.39008	1.46738e-13	2.40745e-11	138.616	0	0	536.627	328.159	0	11.1391	300.563	174.91	994.604	0	0	119.798	0	0
CrematogasterSubCLCMeta_s44064	B	PREDICTED: fatty acyl-CoA reductase 1-like	uncharacterized protein Dmel_CG13091, isoform A [Drosophila melanogaster] Dembeck FA reductase	4961.03	-10.6395	1.33722	-7.95646	1.77033e-15	3.89042e-13	0	0	4.15177	11544.3	31128.4	3.02584	8583.72	10.4802	7.47359	10884.1	3679.01	5	13891.8	13.14	8.42786
CrematogasterSubCLCMeta_rep_c26476	B	PREDICTED: cGMP-dependent 3',5'-cyclic phosphodiesterase-like	NA	158.433	-10.5387	1.63625	-6.44077	1.18866e-10	1.18389e-08	386.671	0	0	357.621	298.526	0	480.313	0	283.361	640.789	0	0	14.7831	0	0
CrematogasterSubCLCMeta_rep_c29721	B	NA	NA	155.811	-10.5148	1.33924	-7.85134	4.1163e-15	8.61133e-13	258.601	0	0	120.413	354.95	0	327.077	74.1883	0	122.052	1107.87	0	275.408	0	0
CrematogasterSubCLCMeta_s56921	B	PREDICTED: fatty acyl-CoA reductase 1-like	NA	1041.85	-10.4876	1.64881	-6.36074	2.00788e-10	1.92768e-08	0	0	8.38666	2221.29	6336.52	0	2245.27	1.54543	2.59861	2172.49	964.915	0	2837.15	0	0
CrematogasterSubCLCMeta_rep_c28445	B	PREDICTED: fatty acid synthase-like	FASN3 [Drosophila melanogaster] FA Synthase Wicker-Thomas 2015	1231.31	-10.4771	2.15353	-4.86508	1.14409e-06	4.28203e-05	5555.43	0	2.00086	3.04019	0	4.05964	0	0	0	8639.21	5299.28	0	5.01673	2.9455	0
CrematogasterSubCLCMeta_s44759	B	PREDICTED: protein N-terminal glutamine amidohydrolase	NA	630.844	-10.4477	1.41344	-7.39173	1.4493e-13	2.38597e-11	551.005	0	1.37012e-07	1490.41	2893.4	0	2459.78	7.98968	13.5501	1495.98	4.57249	0	1051.77	0	5.09687
CrematogasterSubCLCMeta_s43266	B	PREDICTED: thioredoxin domain-containing protein 15	NA	144.519	-10.4062	1.27245	-8.1781	2.88354e-16	7.30909e-14	238.362	0	0	299.131	521.64	0	103.837	0	401.346	301.243	348.46	0	133.913	0	0
CrematogasterSubCLCMeta_s43737	B	PREDICTED: lachesin-like isoform X4	NA	1961.68	-10.3549	1.88987	-5.47915	4.27384e-08	2.33197e-06	5567.2	0	0	1.5323	3109.65	3.29599e-05	2476.53	13758.9	1430.49	2048.6	0	0	0	0	17.0952
CrematogasterSubCLCMeta_rep_c27512	B	PREDICTED: signal recognition particle 19 kDa protein	NA	137.141	-10.3305	1.55435	-6.64615	3.0085e-11	3.39925e-09	274.203	0	0	0	190.752	0	0	286.8	315.178	392.957	162.721	0	541.524	0	0
CrematogasterSubCLCMeta_rep_c22473	B	PREDICTED: uncharacterized protein LOC105462488	NA	846.862	-10.2994	1.04826	-9.82529	8.76253e-23	5.05767e-20	440.803	0	1.27134	310.993	139.47	2.3933	324.682	5826.93	2647.95	403.858	171.881	2.41087	2386.49	2.33098	0
CrematogasterSubCLCMeta_s52418	B	PREDICTED: abl interactor 2 isoform X2	NA	130.323	-10.2572	1.04633	-9.80309	1.09188e-22	6.15397e-20	163.742	0	0	351.554	209.625	0	149.48	148.795	187.92	22.1467	589.012	0	328.534	0	0
CrematogasterSubCLCMeta_rep_c23576	B	PREDICTED: 5-oxoprolinase	NA	129.927	-10.2526	1.32935	-7.71245	1.23427e-14	2.34643e-12	370.128	0	0	0	222.816	0	108.912	159.317	98.8465	249.68	91.8851	0	771.499	0	0
CrematogasterSubCLCMeta_s43873	B	PREDICTED: keratin, type II cytoskeletal 1b-like isoform X2	NA	3838.31	-10.2505	1.53125	-6.69419	2.16871e-11	2.52176e-09	14247.7	0	4.59726	4703.62	7705.54	4.62044	11122	10.2417	0	0	24173.4	0	2352.25	18.0385	4.55947
CrematogasterSubCLCMeta_s44052	B	PREDICTED: transcription factor 25	NA	121.568	-10.1566	1.8512	-5.48649	4.09994e-08	2.24732e-06	545.614	0	0	471.419	432.135	0	197.22	0	0	103.463	169.465	0	0	0	0
CrematogasterSubCLCMeta_s54153	B	PREDICTED: lachesin-like isoform X4	NA	714.185	-10.1456	1.27142	-7.97976	1.46622e-15	3.28235e-13	931.562	0	0	1467.53	785.352	0	1660.39	1563.26	2029.51	1614.2	1094.53	0	0	0	7.16185
CrematogasterSubCLCMeta_s59874	B	PREDICTED: fatty acid synthase-like	FASN3 [Drosophila melanogaster] FA Synthase Wicker-Thomas 2015	311.187	-10.1399	2.2406	-4.52551	6.02487e-06	0.000180509	631	0	0	0	2625.31	1.00182	0	0	1.00069	2	0	0	1815.94	0	2
CrematogasterSubCLCMeta_s59664	B	NA	NA	120.109	-10.1391	1.89005	-5.36446	8.1192e-08	4.12478e-06	716.233	0	0	445.611	0	0	110.412	289.344	47.7945	187.313	0	0	0	0	0
CrematogasterSubCLCMeta_s54209	B	PREDICTED: tumor susceptibility gene 101 protein	NA	233.868	-10.1378	1.31923	-7.68466	1.53408e-14	2.85966e-12	546.509	0	0	405.702	401.445	0	0	770.347	402.933	758.4	123.217	0	126.551	2.44406	0
222-PAT-Cr-FB2_PF_(paired)_contig_1642	B	NA	NA	119.117	-10.1272	2.12705	-4.76115	1.92494e-06	6.70189e-05	285.48	0	0	389.245	0	0	406.233	0	0	330.271	0	0	463.513	0	0
CrematogasterSubCLCMeta_s54116	B	NA	NA	529.793	-10.103	1.08748	-9.29028	1.53876e-20	7.29875e-18	1526.43	1.13498	1.18294	458.634	593.026	1.41874	1729.65	739.919	943.545	1628.33	615.871	1.14307	0	0	1.13112
CrematogasterSubCLCMeta_s53272	B	PREDICTED: uncharacterized protein LOC108689194	NA	116.831	-10.0991	0.950589	-10.624	2.30346e-26	1.8392e-23	137.047	0	0	154.993	228.807	0	162.923	119.381	193.452	468.902	168.499	0	210.724	0	0
CrematogasterSubCLCMeta_rep_c34228	B	PREDICTED: uncharacterized protein K02A2.6-like	NA	113.156	-10.0532	1.02334	-9.8239	8.88403e-23	5.06675e-20	198.558	0	0	212.462	396.567	0	148.369	96.6961	85.6297	134.546	68.4871	0	464.736	0	0
CrematogasterSubCLCMeta_rep_c24919	B	PREDICTED: leucine-rich repeat protein soc-2 homolog	NA	112.175	-10.0409	1.01665	-9.87655	5.26133e-23	3.11178e-20	42.9703	0	0	55.1742	238.172	0	260.082	171.558	264.687	147.21	469.247	0	194.296	0	0
CrematogasterSubCLCMeta_rep_c24153	B	PREDICTED: frizzled-2	NA	108.625	-9.99423	1.6652	-6.00182	1.95123e-09	1.51258e-07	393.917	0	0	16.7695	73.0918	0	1.62155e-06	0	47.2428	383.546	134.706	0.0344082	698.497	0	0
CrematogasterSubCLCMeta_rep_c35435	B	PREDICTED: fatty acyl-CoA reductase 1-like	uncharacterized protein Dmel_CG13091, isoform A [Drosophila melanogaster] Dembeck FA reductase	4857	-9.95823	0.682795	-14.5845	3.52472e-48	1.05537e-44	9446.05	0	12.1731	11817.8	5706.99	13.9738	8313.71	14258.3	11000.1	10294.3	519.241	8.82928	2536.88	7.52171	9.33246
CrematogasterSubCLCMeta_rep_c19617	B	PREDICTED: ejaculatory bulb-specific protein 3-like	NA	558.919	-9.94504	1.22325	-8.12999	4.29339e-16	1.04408e-13	661	0	3	2114	421	0	833	2331	1485	0	69	1	573	2	0
CrematogasterSubCLCMeta_s60054	B	PREDICTED: leucine-rich repeat-containing protein 15-like	NA	472.307	-9.94002	0.894168	-11.1165	1.0427e-28	1.04068e-25	946.44	0	1	1061.8	539.72	1.03385	89.3372	1841.22	1141.99	642.787	610.813	1.01066	352.607	2.00581	0
CrematogasterSubCLCMeta_s59511	B	PREDICTED: ejaculatory bulb-specific protein 3-like	NA	2470.67	-9.86425	1.1127	-8.86516	7.6394e-19	2.90461e-16	2210.96	0	4.62344	6295.26	2892.12	12.8041	7204.61	13630.6	266.238	1	103	3.67094	4253.61	3	2.85538
76-PAR-Cr-FB2_PF_(paired)_contig_2510	B	PREDICTED: histone-lysine N-methyltransferase SETMAR-like	NA	1834.73	-9.85613	1.68658	-5.84386	5.10042e-09	3.60392e-07	4977.77	1	0	16620.9	5	5.2498	6732.88	12	14	15.6555	2	0	3	14	0
CrematogasterSubCLCMeta_rep_c35442	B	PREDICTED: fatty acyl-CoA reductase 1-like	NA	712.675	-9.85521	0.754428	-13.0631	5.34688e-39	1.0673e-35	500.893	0	0	1917.9	2762.96	2.01043	999.75	874.997	693.655	1705.08	338.769	1.69587	1385.81	2.59753	1
CrematogasterSubCLCMeta_rep_c8472	B	PREDICTED: uncharacterized protein LOC105674718	NA	97.5939	-9.83972	1.81713	-5.41497	6.12979e-08	3.21643e-06	0	0	0	224	0	0	0	165	196	377	483	0	137	0	0
CrematogasterSubCLCMeta_s53131	B	PREDICTED: polyglutamine-binding protein 1	NA	94.6283	-9.79511	1.80718	-5.42012	5.95592e-08	3.14587e-06	0	0	0	291	199.29	0	290	215	227.858	232.425	0	0	0	0	0
CrematogasterSubCLCMeta_rep_c32504	B	PREDICTED: uncharacterized protein LOC108729430 isoform X2	NA	91.6021	-9.74811	1.32205	-7.37348	1.66236e-13	2.69961e-11	294.083	0	0	243.175	125.919	0	0	192.085	22.7222	313.091	96.1193	0	115.227	0	0
CrematogasterSubCLCMeta_s52618	B	PREDICTED: uncharacterized protein LOC105203604 isoform X1	NA	177.914	-9.74308	1.35715	-7.17905	7.01975e-13	1.02449e-10	710.868	0	0	435.863	415.523	1.21154	240.208	429.709	17.8148	400.293	0	1.22523	29.7546	0	0
CrematogasterSubCLCMeta_rep_c20621	B	PREDICTED: ribonuclease H-like	NA	88.8737	-9.70459	1.56136	-6.21548	5.11667e-10	4.44872e-08	442.806	0	0	228.626	0	0	57.0838	140.282	0	172.789	96.3848	0	237.85	0	0
CrematogasterSubCLCMeta_s59890	B	PREDICTED: uncharacterized protein LOC103307937	NA	121.129	-9.66972	0.907925	-10.6504	1.73709e-26	1.41048e-23	237.167	0	1	177.652	365.492	0	170.404	131.908	159.731	269.112	190.215	0	222.395	0	0
CrematogasterSubCLCMeta_s52369	B	NA	NA	85.6132	-9.65064	1.83311	-5.26461	1.40484e-07	6.74364e-06	97.2243	0	0	508.775	0	0	148.588	245.456	196.358	101.925	0	0	0	0	0
CrematogasterSubCLCMeta_s60089	B	PREDICTED: uncharacterized protein LOC105147602 isoform X1	NA	84.6916	-9.63518	2.11739	-4.55051	5.35172e-06	0.000163199	0	0	0	0	225.168	1.47626e-05	240.108	71.2871	0	246	641.291	0	0	0	0
CrematogasterSubCLCMeta_s57682	B	PREDICTED: bystin	NA	81.7445	-9.58445	1.3793	-6.94877	3.6849e-12	4.8901e-10	117.026	0	0	42.9664	87.9896	0	111.106	65.0316	51.9216	0	857.887	0	93.6042	0	0
CrematogasterSubCLCMeta_rep_c31064	B	PREDICTED: protein disulfide-isomerase A3	NA	3301.13	-9.56031	0.711112	-13.4442	3.33107e-41	7.97907e-38	9637.87	3.20195	33.1126	4542.61	5853.91	0	5657.32	7698.35	5148.98	2616.84	1761.42	2.14887	8506.88	5.95337	3.33978
CrematogasterSubCLCMeta_rep_c5916	B	PREDICTED: F-box only protein 21-like	NA	74.7028	-9.45405	1.26885	-7.45089	9.2711e-14	1.55842e-11	160.051	0	0	203.98	141.548	0	216	26.9776	0	201.124	97.5043	0	132.927	0	0
CrematogasterSubCLCMeta_rep_c9262	B	PREDICTED: protein PBDC1	NA	74.5782	-9.45163	1.23215	-7.67087	1.70835e-14	3.14777e-12	127.067	0	0	0	136	0	87	121	99.3022	278	187	0	149	0	0
CrematogasterSubCLCMeta_s43974	B	PREDICTED: dyslexia-associated protein KIAA0319	NA	194.096	-9.41071	1.30952	-7.18636	6.65433e-13	9.7489e-11	595.17	0	3.47077	179.036	398.887	0	428.329	0	477.602	65.3746	283.656	0	738.585	0	0
CrematogasterSubCLCMeta_rep_c7299	B	PREDICTED: uncharacterized protein LOC105277942 isoform X1	NA	256.237	-9.33733	0.96645	-9.66147	4.39508e-22	2.36579e-19	391	2	0	1192	277	1	109	512	485	548	73	1	354	0	0
CrematogasterSubCLCMeta_rep_c19146	B	PREDICTED: fatty acid synthase-like	NA	380.385	-9.32787	1.5975	-5.83904	5.25029e-09	3.70435e-07	1288.04	1.004	0	1.02618	1499.01	1	0	0	1	1707.33	681	0	864.998	3	1
CrematogasterSubCLCMeta_s43927	B	PREDICTED: fatty acid synthase-like	NA	396.815	-9.3173	1.88105	-4.95325	7.29852e-07	2.89925e-05	604.07	0	0	0	2977.14	0	0	1.23672	1.21319	1221.62	454.497	0	1120.22	0	6.74924
CrematogasterSubCLCMeta_c23098	B	PREDICTED: uncharacterized protein LOC108758967	NA	67.598	-9.30987	1.79049	-5.19962	1.99699e-07	9.22563e-06	0	0	0	0	294.217	0	199.037	226.732	146.869	0	124.596	0	79.5979	0	0
59-PAR-Cr-FB2_PF_(paired)_contig_1302	B	PREDICTED: chymotrypsin inhibitor-like	NA	130.793	-9.29892	1.56288	-5.94986	2.68364e-09	2.02465e-07	1355.71	0	0	0	26.4912	0	4.34388	70.2871	42.9428	38.7592	178.794	1.70308	329.244	0	0
CrematogasterSubCLCMeta_rep_c7390	B	NA	NA	702.751	-9.29614	0.6228	-14.9264	2.22018e-50	7.59731e-47	1342.07	0	1.02568	972.681	1526.4	0	1312.56	1117.05	1449.64	967.745	1381.39	0	1113.82	1.02552	10
CrematogasterSubCLCMeta_rep_c21234	B	PREDICTED: zinc metalloproteinase nas-4-like	NA	321.388	-9.16907	3.00566	-3.0506	0.00228384	0.0252104	0	0	2	2867	0	0	0	637	1460.95	0	0	4	0	0	0
CrematogasterSubCLCMeta_s43719	B	PREDICTED: 40S ribosomal protein S3-like	NA	2498.42	-9.16766	0.84825	-10.8077	3.16399e-27	2.80699e-24	5157.78	0	30.1376	2755.48	4729.63	2.1532	6171.14	5064.75	2246.76	6468.37	6385.66	10.0572	211.878	5.25247	0
CrematogasterSubCLCMeta_s54318	B	PREDICTED: elongation of very long chain fatty acids protein 4-like	Elongase bond [Drosophila melanogaster] Ng 2015	2643.83	-9.16663	1.15051	-7.96742	1.62019e-15	3.57689e-13	9525.01	0	0	1283.82	2949.66	21.9154	11073.2	351.695	2954.99	9890.93	648.253	0	2510.16	0	27.5802
CrematogasterSubCLCMeta_s43973	B	PREDICTED: zinc finger protein 598	NA	693.851	-9.14344	2.97268	-3.07582	0.00209923	0.0235853	3755.88	0	0	1855.86	2971.38	0	0	0	0	0	2663.94	12.6319	0.00014613	0	0
CrematogasterSubCLCMeta_s45043	B	PREDICTED: histone acetyltransferase KAT7	NA	208.572	-9.12005	0.949773	-9.60234	7.81467e-22	4.11404e-19	128.151	0	0	75.7719	449.866	0	317.651	268.407	440.476	493.183	843.193	0	393.017	0	3.80092
CrematogasterSubCLCMeta_s52382	B	PREDICTED: uncharacterized protein LOC105204248	NA	56.5599	-9.05249	1.0274	-8.81104	1.23993e-18	4.60477e-16	170.837	0	0	87.9777	117.802	0	145.911	59.4414	144.018	62.9186	14.1814	0	87.2156	0	0
76-PAR-Cr-FB2_PF_(paired)_contig_2014	B	PREDICTED: fatty acyl-CoA reductase 1-like	uncharacterized protein Dmel_CG13091, isoform A [Drosophila melanogaster] Dembeck FA reductase	4164.48	-9.0502	0.530091	-17.0729	2.36107e-65	1.8852e-61	9153.86	19.7277	15.2116	10635.3	7246.51	0	4097.1	8231.01	7450.68	8799.86	2955.55	11.8762	5975.13	11.089	23.2413
CrematogasterSubCLCMeta_s53057	B	PREDICTED: borealin	NA	56.3931	-9.04855	1.21645	-7.43848	1.0185e-13	1.70605e-11	60.4155	0	0	157.005	82.9115	0	81.1487	127.379	86.1754	0	201.806	0	115.358	0	0
CrematogasterSubCLCMeta_s43988	B	PREDICTED: CLK4-associating serine/arginine rich protein isoform X3	NA	56.0534	-9.03969	2.16628	-4.1729	3.00749e-05	0.000716458	238.053	0	0	0	403.916	0	175.221	0	0	61.8169	0	0	4.25425	0	0
CrematogasterSubCLCMeta_s43408	B	PREDICTED: uncharacterized protein LOC105195495	NA	54.3903	-8.9962	2.06808	-4.35003	1.36121e-05	0.000364716	218.465	0	0	145.346	179.414	0	0	82.949	222.707	0	0	0	0	0	0
CrematogasterSubCLCMeta_rep_c26716	B	PREDICTED: exportin-4-like	NA	54.0647	-8.9877	1.80654	-4.97509	6.52173e-07	2.63215e-05	75.6678	0	0	63.2536	0	0	60.8079	96.3404	0	156.196	444.364	0	0	0	0
CrematogasterSubCLCMeta_s58733	B	PREDICTED: phospholipase D3-like isoform X1	NA	53.8449	-8.98206	1.26596	-7.09508	1.29278e-12	1.80038e-10	7.5609e-06	0	0	24.0174	53.6293	0	179.578	47.3863	122.349	106.407	205.344	0	151.02	0	0
CrematogasterSubCLCMeta_s54111	B	PREDICTED: transketolase isoform X1	NA	52.2534	-8.93837	1.51108	-5.91524	3.31401e-09	2.44252e-07	0	0	0	187.112	0	0	165.694	108.174	69.8465	73	44.2711	0	174.03	0	0
CrematogasterSubCLCMeta_s53399	B	PREDICTED: ejaculatory bulb-specific protein 3-like	NA	944.451	-8.92121	0.911246	-9.79012	1.24153e-22	6.91603e-20	7107.31	5.62515	3.63054	521.727	1301	0	259	1300.76	944	1001	84	4.54809	2005.02	0	5.20963
CrematogasterSubCLCMeta_rep_c9105	B	PREDICTED: protein ALP1-like	NA	96.9647	-8.86691	1.03058	-8.60381	7.71119e-18	2.47933e-15	62.8201	0	0	282.848	116.371	0	42.0579	99.782	136.936	349.941	324.762	0	137.059	0	2
CrematogasterSubCLCMeta_rep_c27569	B	PREDICTED: iron-sulfur protein NUBPL	NA	93.6727	-8.81684	0.956051	-9.22215	2.91212e-20	1.32868e-17	222.175	0	0	260	167.435	0	103.803	119.547	103.863	127.721	322.068	0	74.4346	1.78524	0
CrematogasterSubCLCMeta_s60114	B	PREDICTED: zinc finger protein on ecdysone puffs isoform X1	NA	48.0141	-8.81621	2.07764	-4.24339	2.20173e-05	0.000550225	0	0	0	133.009	0	0	248.901	166.198	0	139.89	3503.66	0	0	0	0
CrematogasterSubCLCMeta_rep_c10397	B	PREDICTED: tyrosine-protein kinase CSK-like isoform X1	NA	303.079	-8.8022	1.75741	-5.00863	5.48183e-07	2.27769e-05	0	1.19958e-05	0	1.32317	119.021	7.41375	1088.45	85.4813	1160.83	0.440289	1430.81	0	1283.92	0	0
CrematogasterSubCLCMeta_s52783	B	PREDICTED: uncharacterized protein LOC105452295	NA	2723.08	-8.78944	0.668571	-13.1466	1.77959e-39	3.70673e-36	3910.85	15	18	2971.33	5212.77	4	7282	7715.24	4246.03	4190.18	381.429	0	6105.68	14.5347	10.7392
CrematogasterSubCLCMeta_s54286	B	PREDICTED: homeodomain-only protein-like	NA	46.1425	-8.75897	1.54597	-5.66568	1.46444e-08	9.12313e-07	279.485	0	0	0	154.317	0	84.4837	41.869	95.518	0	37.3936	0	36.3656	0	0
CrematogasterSubCLCMeta_rep_c27589	B	PREDICTED: RNA polymerase II-associated protein 3 isoform X1	NA	45.8675	-8.75058	1.91348	-4.57312	4.80516e-06	0.000147944	19.5957	0	0	0	130.189	0	153.205	0.853732	288.245	0	181.742	0	7.55316e-07	0	0
CrematogasterSubCLCMeta_s54301	B	PREDICTED: ras-related protein Rab-7a isoform X1	NA	2592.17	-8.73725	0.836039	-10.4508	1.45349e-25	1.05504e-22	4119.88	34.3591	0	4956.86	4994.04	0	5135.53	4660.05	3778.72	4559.17	6181	0	2667.17	11.2858	13.043
CrematogasterSubCLCMeta_rep_c12628	B	PREDICTED: leucine-rich repeat transmembrane neuronal protein 4-like	NA	1138.31	-8.71217	0.797057	-10.9304	8.2457e-28	7.59667e-25	2555.36	5.13543	2	2847.91	1232.7	1.00683	27.0668	4472.8	2773.15	1017.45	1587.13	14.3919	919.083	2.03305	4.04425
CrematogasterSubCLCMeta_s43267	B	PREDICTED: probable enoyl-CoA hydratase, mitochondrial	NA	1980.29	-8.70686	1.41444	-6.1557	7.47483e-10	6.31564e-08	6028.42	0	0	3329.68	2734.77	27.2551	0	9670.26	4249.83	2500.66	990.438	5.37339	0	14.1879	2.86887
CrematogasterSubCLCMeta_s43528	B	NA	NA	43.9407	-8.68841	1.64601	-5.27846	1.30273e-07	6.29132e-06	71.8119	0	0	31.7697	105.506	0	163.34	0.821885	120.475	193.576	0	0	8.94855e-05	0	0
CrematogasterSubCLCMeta_s60502	B	PREDICTED: probable malonyl-CoA-acyl carrier protein transacylase, mitochondrial	NA	43.0471	-8.65985	1.1136	-7.77644	7.45968e-15	1.48905e-12	92.2376	0	0	10.944	21.025	0	67.3879	40.3219	51.1049	36.8791	277.207	0	129.012	0	0
CrematogasterSubCLCMeta_rep_c16573	B	PREDICTED: uncharacterized protein LOC105450917, partial	NA	58.3139	-8.61404	0.968934	-8.89022	6.09857e-19	2.37532e-16	87.1027	0	0	181.463	108.079	0	118.134	41.0958	67.2903	149.934	45.1895	1	120.987	0	0
CrematogasterSubCLCMeta_rep_c4836	B	PREDICTED: cell division cycle 5-like protein	NA	41.4873	-8.60587	1.52882	-5.62908	1.8117e-08	1.09865e-06	29.6674	0	0	58.3193	59.9041	0	0	91.8276	150.851	0.132281	270.147	0	31.9396	0	0
CrematogasterSubCLCMeta_rep_c35684	B	PREDICTED: alanine aminotransferase 2-like isoform X3	NA	330.074	-8.60029	0.947892	-9.07307	1.15713e-19	5.03952e-17	1950.78	2.37852	0	188.106	424.9	0	506.842	284.849	896.826	145.285	152.15	0	640.8	0	7.3227
CrematogasterSubCLCMeta_s44922	B	PREDICTED: folliculin	NA	41.0165	-8.58908	2.06519	-4.15898	3.19674e-05	0.000755158	176.024	0	0	0	44.9263	0	52.322	0	0	234.33	143.297	0	0	0	0
CrematogasterSubCLCMeta_s43313	B	NA	NA	40.9251	-8.58602	1.18383	-7.25274	4.08424e-13	6.17235e-11	56.7333	0	0	35.7185	178.848	0	105.967	44.1615	132.37	9.52577	3.3299	0	87.3156	0	0
CrematogasterSubCLCMeta_s26301	B	PREDICTED: dual specificity protein phosphatase CDC14B isoform X2	NA	40.5617	-8.57309	1.51569	-5.65622	1.54745e-08	9.56563e-07	0	0	0	0	64.6352	0	101.945	17.1106	85.904	208.293	70.0645	0	102.273	0	0
CrematogasterSubCLCMeta_rep_c5607	B	PREDICTED: GPN-loop GTPase 3 isoform X2	NA	56.4095	-8.56633	1.68898	-5.07191	3.93847e-07	1.69677e-05	0	0	0	0	221	0	83.6597	156	63.2973	0	167.765	0	224.254	0.865161	0
CrematogasterSubCLCMeta_s59795	B	PREDICTED: etoposide-induced protein 2.4 homolog isoform X1	NA	424.685	-8.5107	1.45264	-5.85877	4.66296e-09	3.33416e-07	862.975	0	0	636.386	1288.74	12.2124	4.14201	792.039	0	1765.13	750.252	0	476.995	0	0
CrematogasterSubCLCMeta_s44813	B	PREDICTED: putative nuclease HARBI1	NA	38.5122	-8.49807	1.83452	-4.6323	3.61622e-06	0.000116192	64.4071	0	0	232.815	0	0	27.569	0	15.2693	206.334	0	0	43.9939	0	0
CrematogasterSubCLCMeta_s44802	B	PREDICTED: rho guanine nucleotide exchange factor 2-like isoform X1	NA	38.4175	-8.49461	1.49223	-5.69257	1.25141e-08	7.9406e-07	93.7041	0	0	128.008	116.653	0	134.148	45.5588	44.9498	0	41.3524	0	0	0	0
CrematogasterSubCLCMeta_s43910	B	PREDICTED: very long-chain-fatty-acid--CoA ligase bubblegum	NA	516.302	-8.49259	0.981891	-8.64923	5.18499e-18	1.71308e-15	2150.6	0	0	492.562	596.21	0	463.239	1028.31	711.565	815.351	528.217	0	1248.62	0	15.8218
CrematogasterSubCLCMeta_s43471	B	NA	NA	38.0783	-8.4813	1.02051	-8.31087	9.50041e-17	2.61573e-14	120.079	0	0	20.6243	61.3782	0	20.3139	64.8642	94.01	110.334	58.5647	0	47.3414	0	0
CrematogasterSubCLCMeta_s44232	B	PREDICTED: rho guanine nucleotide exchange factor 18-like isoform X9	NA	37.8626	-8.47396	1.24274	-6.81878	9.18179e-12	1.13955e-09	38.3078	0	0	39.418	141.683	6.50745e-08	131.68	25.6795	0	56.7776	98.9542	0	80.7131	0	0
CrematogasterSubCLCMeta_s59765	B	PREDICTED: 14 kDa phosphohistidine phosphatase-like	NA	37.0964	-8.44412	1.49707	-5.64042	1.69631e-08	1.03391e-06	3.16082	0	0	127.78	0	0	2.45425	12.6954	59.4477	224.068	57.7122	0	97.5201	0	0
CrematogasterSubCLCMeta_rep_c18179	B	NA	NA	65.9092	-8.43702	2.09387	-4.02938	5.59232e-05	0.00122055	0	0	1	599	0	0	0	132	283	1	0	0	1	1	0
CrematogasterSubCLCMeta_s54256	B	PREDICTED: chondroadherin-like	NA	36.8921	-8.43569	1.45969	-5.77908	7.51082e-09	5.10384e-07	87.1084	0	0	92.7081	35.3324	0	6.67584	183.096	125.313	2	0	0	21.7477	0	0
CrematogasterSubCLCMeta_s44345	B	transcription factor IIIA-like	NA	35.9232	-8.39772	1.29336	-6.49296	8.41681e-11	8.70894e-09	88.9213	0	0	9.30892	106.711	0	53.4942	45.1087	0	137.499	99.2541	0	28.6643	0	0
CrematogasterSubCLCMeta_s60459	B	PREDICTED: spectrin alpha chain-like	NA	35.4986	-8.38129	1.04786	-7.99852	1.25925e-15	2.85909e-13	15.9544	0	0	21.6554	23.1656	0	38.5429	61.939	117.319	69	110.254	0	119.644	0	0
CrematogasterSubCLCMeta_rep_c30608	B	PREDICTED: transmembrane protein 245 isoform X1	NA	118.093	-8.3597	1.82135	-4.58984	4.43585e-06	0.000137903	343.131	0	0	0	0	0	544.215	43.1216	534.258	336.726	0	0	55.2829	0	4.26529
CrematogasterSubCLCMeta_rep_c750	B	PREDICTED: blastoderm-specific protein 25D isoform X2	NA	34.8709	-8.35429	1.25361	-6.66418	2.66154e-11	3.02866e-09	105	0	0	105.519	59.1623	0	30.358	101.731	65.2958	27.0946	0	0	37.5595	0	0
CrematogasterSubCLCMeta_s40034	B	PREDICTED: cytochrome P450 6k1-like isoform X3	NA	34.3701	-8.33427	1.36783	-6.09307	1.10765e-09	9.07082e-08	2.94682	0	0	64.1631	75.0577	0	14.1328	74.7023	56.4289	0	63.1941	0	208.328	0	0
CrematogasterSubCLCMeta_s43752	B	PREDICTED: heat shock 70 kDa protein cognate 4	NA	13006.3	-8.30154	1.50891	-5.50169	3.76176e-08	2.08341e-06	17719.4	0	147.446	53162.9	60290.3	0	45828.3	19.577	24175.6	0	5837.65	20.3739	71.2566	170.542	105.143
CrematogasterSubCLCMeta_rep_c26185	B	PREDICTED: 40S ribosomal protein S6 isoform X1	NA	4338.41	-8.30138	0.832698	-9.96926	2.07768e-23	1.29267e-20	17.9817	75.6513	12.2867	4262.73	5490.63	16.4599	12484.2	6617.73	10595.5	5381.27	14769.9	4.11837	11213.2	13.8953	7.65787
CrematogasterSubCLCMeta_s57184	B	PREDICTED: uncharacterized protein LOC108912782 isoform X2	NA	214.614	-8.29897	2.21371	-3.7489	0.000177609	0.00323525	0	0	0	0	3455.89	1	0	3	0	3.94572	1.5278	2	8138.33	3.81745	0
CrematogasterSubCLCMeta_s44914	B	PREDICTED: protein NYNRIN-like	NA	33.449	-8.29509	1.50648	-5.50627	3.66513e-08	2.03932e-06	79.652	0	0	88.9245	151.342	0	0	34.2546	0.74368	21.2778	168.599	0	2.02883	0	0
CrematogasterSubCLCMeta_s44882	B	PREDICTED: CDGSH iron-sulfur domain-containing protein 2 homolog	NA	87.5676	-8.27954	1.53456	-5.39538	6.83791e-08	3.52241e-06	419.562	0	0	33.4496	274.677	0	0	0	129.309	145.948	219.907	0	192.385	0	3.35324
CrematogasterSubCLCMeta_s59894	B	uncharacterized protein LOC110997052	NA	32.7697	-8.26579	1.03953	-7.95146	1.8433e-15	3.9958e-13	45.0039	0	0	71.4391	51.468	0	128.1	31.7549	16.813	15.0312	65.8023	0	103.506	0	0
CrematogasterSubCLCMeta_s44997	B	PREDICTED: mitochondrial import inner membrane translocase subunit Tim17-B-like	NA	442.198	-8.26544	0.928245	-8.90437	5.36883e-19	2.10823e-16	840.55	0.00279046	0	719.304	827	0	973.687	757	826.191	1059.34	348.327	0	532.504	0	16.17
CrematogasterSubCLCMeta_s60027	B	PREDICTED: uncharacterized protein LOC105192857	NA	32.5025	-8.25326	1.75527	-4.702	2.57631e-06	8.63705e-05	0	0	0	141.82	0	0	52.708	105.462	2.05931e-07	87.4967	89.5303	0	26.4802	0	0
CrematogasterSubCLCMeta_s52819	B	PREDICTED: uncharacterized protein LOC105433789	NA	32.4633	-8.25265	1.34876	-6.11871	9.4338e-10	7.83267e-08	29.4521	0	0	0	62.8948	0	38.9665	4.7506	27.1992	64.8744	264.874	0	65.1496	0	0
CrematogasterSubCLCMeta_s56331	B	PREDICTED: beta-1,3-galactosyltransferase 5-like	NA	32.3618	-8.24725	1.74421	-4.72836	2.26343e-06	7.70129e-05	0	0	0	162.122	0	0	0	52.4958	100.976	34.9215	73.5708	0	96.251	0	0
CrematogasterSubCLCMeta_rep_c15073	B	PREDICTED: chondroadherin-like	NA	45.0438	-8.24125	1.22944	-6.70327	2.03801e-11	2.38716e-09	134.182	0	0	10.6387	47.9088	0	336.849	50.2938	38.1963	61.3647	7.01663	0	14.5568	0	1.09745
CrematogasterSubCLCMeta_s52626	B	PREDICTED: ubiquitin carboxyl-terminal hydrolase 46	NA	32.1468	-8.23733	1.4725	-5.59411	2.21758e-08	1.3132e-06	77.4503	0	0	0	0	0	62.9418	108.629	28.0293	64.0023	66.1595	0	94.3746	0	0
CrematogasterSubCLCMeta_s44900	B	PREDICTED: ras-related protein M-Ras-like isoform X1	NA	62.5717	-8.23412	0.931203	-8.84245	9.36439e-19	3.51713e-16	135.607	0	0	84.0868	115.248	0	114.535	88.1265	128.339	32.8631	153.829	0	154.657	2.11175	0
CrematogasterSubCLCMeta_rep_c27499	B	PREDICTED: uncharacterized protein LOC105193999, partial	NA	32.0452	-8.23285	1.2714	-6.47544	9.45364e-11	9.67726e-09	45.8267	0	0	67.7514	81.1736	0	85.2891	20.1278	98.0528	93.1498	11.9538	0	0	0	0
CrematogasterSubCLCMeta_s52500	B	PREDICTED: long-chain fatty acid transport protein 4 isoform X1	NA	2034.5	-8.23085	1.03469	-7.95492	1.79247e-15	3.90327e-13	5261.36	0	0	3699.84	3685.68	27.5378	3849.91	4634.27	3424.96	3010.35	1285.48	0	2600.33	0	45.5813
CrematogasterSubCLCMeta_s52504	B	PREDICTED: 40S ribosomal protein S9	NA	2168.86	-8.20035	1.3186	-6.21897	5.00422e-10	4.3668e-08	5232.13	4.00132	55.5514	5613.79	5556.87	10.8209	0	5785.32	6368.65	2200.48	2855.62	3.23766	0	0	6.48106
CrematogasterSubCLCMeta_s44371	B	NA	NA	31.2329	-8.19615	1.47152	-5.56983	2.54986e-08	1.48247e-06	124.838	0	0	26.9992	76.1037	0	0	0	83.4772	53.2771	43.9493	0	95.7191	0	0
CrematogasterSubCLCMeta_s44774	B	PREDICTED: thyroid receptor-interacting protein 11-like	NA	31.2143	-8.19495	2.41174	-3.39794	0.000678945	0.00960325	301.925	0	0	90.3727	8.73e-08	0	8.28149e-06	13.4714	0	65.5707	0	0	0	0	0
CrematogasterSubCLCMeta_s43615	B	PREDICTED: uncharacterized protein LOC105207250, partial	NA	31.0559	-8.1874	1.09111	-7.50372	6.20317e-14	1.07283e-11	72.1738	0	0	32.3138	165.924	0	51.4104	34.9431	26.1445	55.6164	8.24971	0	41.4805	0	0
CrematogasterSubCLCMeta_s55537	B	PREDICTED: 25S rRNA (cytosine-C(5))-methyltransferase nop2-like	NA	30.5674	-8.16517	1.26754	-6.44174	1.18112e-10	1.17884e-08	16.0963	0	0	0	25.7621	0	56.013	44.2382	39.2092	122.912	145.353	0	48.0289	0	0
CrematogasterSubCLCMeta_s53134	B	PREDICTED: uncharacterized protein LOC105556748	NA	30.4331	-8.1585	1.75639	-4.64505	3.39996e-06	0.000109907	0	0	0	0	106.227	0	64.7803	116.335	107.167	0	73.94	0	15.3516	0	0
CrematogasterSubCLCMeta_s56931	B	NA	NA	27.952	-8.15289	2.70037	-3.01917	0.00253466	0.027361	0	0	0	1	0	0	0	0	0	1673	524	0	2	1	0
CrematogasterSubCLCMeta_s43425	B	suppressor of hairless protein	NA	30.2475	-8.14971	2.12191	-3.84074	0.000122663	0.00236616	298.49	0	0	9.08705	0	0	0	0	19.6574	0	37.7545	0	114.905	0	0
CrematogasterSubCLCMeta_s43378	B	PREDICTED: SURP and G-patch domain-containing protein 1-like isoform X2	NA	29.6474	-8.1206	2.08553	-3.89378	9.8696e-05	0.00196764	26.2003	0	0.000480999	212.263	111.753	0	3.82274e-07	87.449	12.5933	0	0	0	6.61746e-05	0	0
CrematogasterSubCLCMeta_rep_c37100	B	NA	NA	28.6119	-8.06947	2.35213	-3.4307	0.000602028	0.00876104	0	0	0	0	0	0	0	83.4764	194.349	68.1216	0	0	105.984	0	0
CrematogasterSubCLCMeta_c11137	B	PREDICTED: putative nuclease HARBI1	NA	76.7162	-8.03978	1.74734	-4.60114	4.20184e-06	0.000131481	0	0	0	162	0	0	0	146.105	144	350	283	3	135	0	0
CrematogasterSubCLCMeta_s59586	B	PREDICTED: protein SMG9 isoform X2	NA	27.8854	-8.03295	1.77743	-4.51942	6.20092e-06	0.00018456	0	0	0	42.2751	70.235	0	0	13.3836	27.457	0	187.192	0	141.563	0	7.86237e-05
CrematogasterSubCLCMeta_s57381	B	NA	NA	27.6177	-8.01826	1.21633	-6.5922	4.33356e-11	4.75075e-09	75.2519	0	0	83.1382	62.9832	0	0	52.4872	58.4769	16	35.876	0	52.4735	0	0
CrematogasterSubCLCMeta_s44059	B	PREDICTED: tyrosine-protein phosphatase corkscrew	NA	100.126	-7.99112	1.61139	-4.95916	7.07991e-07	2.82883e-05	269.368	0	0	77.7291	464.196	0	12.1941	353.482	0	28.2169	369.274	0	0	3.50934	0
CrematogasterSubCLCMeta_s54294	B	PREDICTED: superoxide dismutase	NA	423.524	-7.99074	1.51512	-5.27399	1.33493e-07	6.43384e-06	488.234	0	0	0	1602.95	0	1596.3	26.6492	1327.01	1617.36	0	4.59316	11.0118	4.002	8.99755
CrematogasterSubCLCMeta_s26443	B	PREDICTED: uncharacterized protein LOC105202897	NA	26.846	-7.97769	1.55166	-5.1414	2.72693e-07	1.22897e-05	17	0	0	6	0	0	0	32.8429	66.108	144.062	93.9141	0	71.8268	0	0
CrematogasterSubCLCMeta_rep_c12110	B	PREDICTED: uncharacterized protein LOC108767674	NA	120.687	-7.96472	0.89083	-8.94079	3.86403e-19	1.54262e-16	100.476	1	0	272.627	154.711	0	80.7412	169	227.337	197	732.234	3	54.7976	0	1
CrematogasterSubCLCMeta_s44042	B	PREDICTED: plexin domain-containing protein 2	NA	413.53	-7.94469	0.703817	-11.288	1.50418e-29	1.63775e-26	1174.46	0	0	1232.33	790.676	5.22142	772.316	772.497	535.387	380.137	330.373	2.75029	427.559	0	9.81733
CrematogasterSubCLCMeta_s60139	B	PREDICTED: uncharacterized protein LOC105453964 isoform X1	NA	781.649	-7.88677	1.54007	-5.12105	3.03836e-07	1.35152e-05	1758.69	0	0	443.668	335.827	33.6729	8.82874e-05	46.0034	1399.26	2601.86	3802.65	0	2542.74	0	0
59-PAR-Cr-FB2_PF_(paired)_contig_8715	B	PREDICTED: myotubularin-related protein 13	NA	25.1177	-7.88147	2.1947	-3.59114	0.000329235	0.00534625	171.992	0	0	0	0.80636	0	4.37831	0	0.00520339	124.763	0	0	85.2047	0	0
76-PAR-Cr-FB2_PF_(paired)_contig_15569	B	PREDICTED: ejaculatory bulb-specific protein 3-like	NA	24.6487	-7.85362	1.58785	-4.94607	7.57279e-07	2.99332e-05	16	0	0	75.9123	7.76466	0	28.7197	154.874	65.5513	0	0	0	15.2437	0	0
CrematogasterSubCLCMeta_s54340	B	NA	NA	24.458	-7.84296	1.74228	-4.50156	6.74568e-06	0.000198871	0	0	0	22.0383	0	0	80.288	57.7014	68.4233	117.228	33.3961	0	0	0	0
CrematogasterSubCLCMeta_s43911	B	PREDICTED: fatty acid synthase-like	FASN2 [Drosophila melanogaster] mb FA synthase Chung 2014	24.7657	-7.83737	2.69217	-2.91117	0.00360083	0.0358564	1.41502	1.29477	0	0	1144.49	0	0	0	2.43578	0	0	0	415.903	0	0
CrematogasterSubCLCMeta_s57051	B	PREDICTED: fatty acid synthase-like	NA	570.763	-7.81886	2.78152	-2.81101	0.0049387	0.0457902	2851.34	0	0	1.05295	0	24.9916	0	0	0	4083.96	1982.95	0	3.40159	1.02385	0
CrematogasterSubCLCMeta_s59886	B	PREDICTED: actin cytoskeleton-regulatory complex protein PAN1-like	NA	23.9764	-7.81468	2.02164	-3.86552	0.000110852	0.00217114	0	0	0	0	0	0	50.1372	0	36.0697	148.362	120.001	0	40.1793	0	0
CrematogasterSubCLCMeta_rep_c33232	B	PREDICTED: multifunctional protein ADE2	NA	102.719	-7.81415	1.22973	-6.35434	2.09325e-10	2.00163e-08	386.33	0	0	177.533	194.183	0	176.717	276.289	80.8046	0	78.8095	0	216.726	0	4.6321
CrematogasterSubCLCMeta_c8880	B	PREDICTED: uncharacterized protein LOC105206346	NA	23.7615	-7.80122	1.21937	-6.39777	1.57667e-10	1.5415e-08	85	0	0	62	66	0	3	50	32	1	43	0	32	0	0
CrematogasterSubCLCMeta_c8861	B	PREDICTED: uncharacterized protein LOC105669272	NA	23.5834	-7.79116	1.10847	-7.02877	2.08363e-12	2.82778e-10	57	0	0	34	44	0	3	25	21	68	109	0	21	0	0
CrematogasterSubCLCMeta_rep_c39042	B	PREDICTED: uncharacterized protein LOC105566560	NA	85.5497	-7.78294	1.73363	-4.48938	7.14303e-06	0.000208787	173.984	0	0	0	297.049	4.39546	242.224	224.749	138.452	0	290.079	0	0	0	0
CrematogasterSubCLCMeta_rep_c26755	B	PREDICTED: sorting nexin-13-like	NA	292.806	-7.7766	1.31042	-5.93441	2.94897e-09	2.204e-07	529.042	0	0	788.423	167.91	0	497.05	10.3837	0	640.129	554.134	11.7055	1545.77	1.98982	0
CrematogasterSubCLCMeta_c30666	B	PREDICTED: tRNA (cytosine(38)-C(5))-methyltransferase	NA	23.144	-7.76441	1.20101	-6.46489	1.01372e-10	1.03109e-08	40.2454	0	0	59.3207	85.2736	0	3.47921	18.3942	9.02125	4.50588	87.3736	0	74.9946	0	0
CrematogasterSubCLCMeta_rep_c37505	B	NA	NA	23.0797	-7.75929	1.44514	-5.36922	7.90772e-08	4.03875e-06	32	0	0	0	57.2097	0	44.9207	46.7772	0	82	38	0	60.9341	0	0
CrematogasterSubCLCMeta_s44429	B	PREDICTED: codanin-1	NA	22.5949	-7.72872	2.34412	-3.29707	0.000976982	0.0128866	77.7338	0	0	126.1	0	0	103.724	37.407	0	0	0	0	0	0	0
CrematogasterSubCLCMeta_s44180	B	PREDICTED: uncharacterized protein LOC105279359	NA	31.0702	-7.7038	1.0415	-7.39681	1.39494e-13	2.31237e-11	85.4596	1.27506	0	30.6517	85.3729	0	66.1258	58.1759	54.2048	29.7075	78.4359	0	4.82504	0	0
CrematogasterSubCLCMeta_rep_c2516	B	PREDICTED: maltase 1-like	NA	178.619	-7.68636	1.11952	-6.86578	6.61292e-12	8.49344e-10	50	0	0	538.869	236.616	8	48	260.008	1030.98	531.073	16	0	73.6353	0	1.11889
CrematogasterSubCLCMeta_rep_c26564	B	PREDICTED: tetraspanin-33-like	NA	228.174	-7.64859	1.64486	-4.65001	3.31923e-06	0.000107588	14.596	0	0	0	572.73	0	308.904	420.423	395.006	426.672	1664.53	12.0676	0	0	0
CrematogasterSubCLCMeta_s58033	B	NA	NA	21.3563	-7.64815	1.49615	-5.11188	3.18966e-07	1.40966e-05	48.501	0	0	17.1391	41.4337	0	120.381	0	21.759	0	87.7335	0	17.2035	0	0
CrematogasterSubCLCMeta_rep_c24948	B	PREDICTED: prolactin regulatory element-binding protein	NA	836.262	-7.63848	0.822899	-9.2824	1.65697e-20	7.78239e-18	2129.1	0	11.1143	1901.11	1549.85	29.5494	1421	1392.7	1339	922.023	891.745	2.56548	1556.25	0	0
CrematogasterSubCLCMeta_c25910	B	PREDICTED: putative nuclease HARBI1	NA	21.2065	-7.63751	2.35144	-3.24802	0.00116212	0.0148039	0	0	0	0	0	0	160.126	0	115.669	28.0377	0	0	39.9436	0	0
CrematogasterSubCLCMeta_rep_c34213	B	PREDICTED: zinc carboxypeptidase-like	NA	643.535	-7.62321	1.51937	-5.01736	5.23854e-07	2.18608e-05	1826.61	0	0	508.233	1347.96	0	4888.97	407.535	438.235	0	509.625	0	253.206	0	37.4105
CrematogasterSubCLCMeta_c25172	B	PREDICTED: uncharacterized protein LOC105458971 isoform X2	NA	20.7943	-7.60946	1.14008	-6.67447	2.48124e-11	2.85742e-09	8	0	0	6	77.8611	0	101.658	19	13.4749	38	34	0	36.1257	0	0
CrematogasterSubCLCMeta_s55549	B	PREDICTED: uncharacterized protein LOC108767493 isoform X2	NA	20.512	-7.58989	2.07821	-3.65213	0.000260072	0.00442917	31.6659	0	0	0	0	0	21.6515	32.6504	0	12.9258	259.413	0	0	0	0
CrematogasterSubCLCMeta_s60024	B	PREDICTED: carboxyl-terminal PDZ ligand of neuronal nitric oxide synthase protein-like isoform X1	NA	73.0689	-7.55594	1.30088	-5.80833	6.30996e-09	4.38012e-07	71.2161	0	0	67.5991	0	4.49437	133.189	37.9911	35.6672	438.732	229.031	0	146.745	0	0
CrematogasterSubCLCMeta_s35430	B	PREDICTED: axonemal 84 kDa protein	NA	369.025	-7.54329	0.682399	-11.0541	2.09465e-28	2.00697e-25	855.179	0	0	1008.03	506.791	2.63621	597.34	520.917	373.161	926.383	565.206	12.0725	402.487	0	6.31457
CrematogasterSubCLCMeta_rep_c33610	B	cytochrome c oxidase subunit I (mitochondrion)	NA	259327	-7.53565	0.425821	-17.6968	4.44158e-70	4.25566e-66	476444	1506.96	5572.68	428716	407018	439.677	452621	448789	452598	587742	281369	2112.08	519961	2761.44	2363.48
CrematogasterSubCLCMeta_rep_c12627	B	PREDICTED: uncharacterized protein LOC108720937	NA	342.655	-7.53315	1.27114	-5.92629	3.09856e-09	2.3086e-07	777.153	0	0	497.669	1069.23	0	0	10.7557	510.973	1219.82	24.5708	9	1301.32	2.46532	9.26083
CrematogasterSubCLCMeta_s60725	B	uncharacterized protein LOC111042513	NA	19.484	-7.51443	1.34981	-5.56701	2.59151e-08	1.50305e-06	99.8834	0	0	0	3.06834	0.065402	35.4214	36.1055	20.4643	59.2315	10.178	0	36.4844	0	0
CrematogasterSubCLCMeta_s60149	B	PREDICTED: DNA polymerase subunit gamma-2, mitochondrial	NA	236.215	-7.50198	1.38137	-5.43082	5.60943e-08	2.97928e-06	73.7061	0	0	0	55.5346	7.17559	20.1879	160.965	67.8912	680.855	984.56	0	1896.28	0	6.77802
CrematogasterSubCLCMeta_s54325	B	PREDICTED: teneurin-m isoform X1	NA	51.539	-7.50055	1.73533	-4.32227	1.5443e-05	0.000404719	116.047	0	3.22543	0	0	0	331.841	72.3531	138.374	0	77.633	0	87.8049	0	0
CrematogasterSubCLCMeta_s60105	B	NA	NA	51.7219	-7.48895	1.62098	-4.62001	3.83715e-06	0.000121982	106.487	0	2.01751	145	1	1	0	198.416	150.946	166	2	0	0	0	0
CrematogasterSubCLCMeta_rep_c31155	B	PREDICTED: twinfilin isoform X3	NA	19.0434	-7.48178	1.76725	-4.23357	2.30015e-05	0.000569769	0	0	0	0	0	0	42.8741	42.1448	18.7315	134.325	12.0835	0	40.9754	0	0
CrematogasterSubCLCMeta_rep_c6411	B	PREDICTED: uncharacterized protein LOC107038770	NA	50.853	-7.47685	1.24929	-5.98489	2.16535e-09	1.6641e-07	285	0	2	14	178	0	60.192	4	78	142.903	22.5361	0	6.27956	0	1
CrematogasterSubCLCMeta_c163	B	uncharacterized protein LOC101453534, partial	NA	18.9678	-7.47505	0.957312	-7.80837	5.79305e-15	1.17596e-12	20	0	0	35	32	0	17	39	23	57	44	0	32	0	0
CrematogasterSubCLCMeta_rep_c6472	B	PREDICTED: NAD-dependent protein deacetylase sirtuin-7	NA	18.9071	-7.4722	1.71605	-4.35431	1.33484e-05	0.000358454	41.0205	0	0	64.1141	22.9987	0	0	25.6065	0	0	111.871	0	47.2427	0	0
CrematogasterSubCLCMeta_rep_c36702	B	PREDICTED: THAP domain-containing protein 4-like	NA	377.024	-7.47076	0.765705	-9.75671	1.72673e-22	9.50833e-20	684	0	19	819	916	0	615	471	457	742	498	0	737	3	1
CrematogasterSubCLCMeta_s56007	B	PREDICTED: cytochrome P450 4V2-like	NA	36.7579	-7.46357	1.63012	-4.57854	4.68226e-06	0.000144532	112.23	0	0	124.38	0	1.0207	24.7142	139.227	0	117.896	25.4662	0	0	1.00717	0
CrematogasterSubCLCMeta_rep_c17456	B	NA	NA	18.6821	-7.45516	1.2818	-5.81615	6.02185e-09	4.20537e-07	0	0	0	6.45998	22.3341	0	58.5183	8.1607	50.5019	62	41.3125	0	55.3674	0	0
CrematogasterSubCLCMeta_c4353	B	PREDICTED: uncharacterized protein LOC105848702	NA	118.173	-7.4506	2.12183	-3.51141	0.000445739	0.00685742	175.546	6.03029	0	0	13	0	0	292.818	0	0	1277.58	0	270.522	0	0
CrematogasterSubCLCMeta_s26717	B	NA	NA	18.4564	-7.43756	2.05032	-3.62752	0.000286162	0.00478004	20.4509	0	0	0	0	0	16.2865	17.721	120.358	0	143.699	0	0	0	0
CrematogasterSubCLCMeta_c6134	B	PREDICTED: anosmin-1 isoform X2	NA	18.2041	-7.41772	1.5696	-4.72588	2.2912e-06	7.79024e-05	0	0	0	14	140	0	41	0	49	11	41	0	4	0	0
CrematogasterSubCLCMeta_s45027	B	PREDICTED: uncharacterized protein LOC106751022	NA	17.9996	-7.40055	1.70871	-4.33107	1.48386e-05	0.000391882	42.672	0	0	0	46.2437	0	0	38.2089	58.0249	71.859	22.1861	0	0.0130189	0	0
CrematogasterSubCLCMeta_rep_c7130	B	PREDICTED: zinc finger protein Noc	NA	233.629	-7.39926	1.30579	-5.66651	1.45736e-08	9.09085e-07	130.16	0	0	429.262	371.341	0	0	314.042	485.306	657.582	959.038	0	439.164	14.4563	0
CrematogasterSubCLCMeta_rep_c35445	B	PREDICTED: fatty acyl-CoA reductase 1-like	uncharacterized protein Dmel_CG13091, isoform A [Drosophila melanogaster] Dembeck FA reductase	4533.48	-7.388	0.711254	-10.3873	2.83277e-25	1.99573e-22	5508.25	16.0682	181.7	12465.2	12101.8	1.23113	9858.75	5236.81	5985.46	12029.2	1469.08	40.2938	5776.95	25.7549	27.0373
CrematogasterSubCLCMeta_s43224	B	PREDICTED: uncharacterized protein LOC105562793	NA	653.057	-7.37119	0.960194	-7.67677	1.63153e-14	3.02953e-12	1752.61	0	31.2486	745.294	1054.97	0	551.033	404.183	1337.7	1727.1	1709.22	11.5804	1180.64	0	0
CrematogasterSubCLCMeta_rep_c23524	B	PREDICTED: maltase 1-like	NA	61.2585	-7.37017	1.44916	-5.08582	3.66037e-07	1.58838e-05	180.448	0	0	312.813	0	1.28086	154.355	53.7035	13.0246	0	68.7668	0	181.948	0	3.09379
76-PAR-Cr-FB2_PF_(paired)_contig_16517	B	PREDICTED: uncharacterized protein LOC105831393	NA	17.5954	-7.36785	1.1952	-6.16451	7.07018e-10	5.99107e-08	22.9385	0	0	18	43.8815	0	57.8622	40.3747	23.3983	24	49	0	0	0	0
CrematogasterSubCLCMeta_rep_c39809	B	NA	NA	17.5614	-7.36525	1.29052	-5.7072	1.14851e-08	7.37556e-07	11.9401	0	0	51.1596	72.6389	0	28.8793	0	7.44775	67	18	0	21.0201	0	0
CrematogasterSubCLCMeta_rep_c40106	B	PREDICTED: relaxin receptor 1 isoform X2	NA	17.5491	-7.3642	1.45803	-5.05079	4.39993e-07	1.87367e-05	36.457	0	0	14.1187	63.4807	0	71.4976	27.1049	34.3467	0	0	0	31.679	0	0
CrematogasterSubCLCMeta_s52636	B	PREDICTED: protein MON2 homolog isoform X2	NA	419.624	-7.3572	1.19161	-6.17418	6.65071e-10	5.67942e-08	460.892	0	0	67.5835	720.202	8.37357	1513.56	777.255	1013.34	0.725547	1407.68	0	864.911	17.907	0
CrematogasterSubCLCMeta_s59544	B	NA	NA	17.313	-7.34448	1.26613	-5.80075	6.60208e-09	4.54479e-07	7.37217	0	0	5.83163	70.5577	0	42.1961	14.812	1.88775	89.0993	35.1275	0	6.21237	0	0
CrematogasterSubCLCMeta_rep_c38994	B	NA	NA	17.2101	-7.33614	1.98485	-3.69606	0.000218971	0.00383135	64.2392	0	0	0	0	0	64.8671	46.106	0	0	64.7888	0	34.7551	0	0
CrematogasterSubCLCMeta_s60249	B	PREDICTED: retrovirus-related Pol polyprotein from transposon TNT 1-94, partial	NA	61.7721	-7.3266	1.04068	-7.04023	1.91922e-12	2.61949e-10	76.8915	0	0.784131	114.746	14.2959	2.69314	58.2154	104.998	72.5632	33.064	482.857	0	76.9103	0	0
CrematogasterSubCLCMeta_rep_c26144	B	PREDICTED: maltase 1-like	NA	16.9012	-7.31046	2.22604	-3.28406	0.00102323	0.0133269	0	0	0	20.4149	0	0	0	257.892	1	0	26	0	238.436	0	0
CrematogasterSubCLCMeta_rep_c35276	B	NA	NA	23.5946	-7.30574	0.92864	-7.86714	3.62853e-15	7.62422e-13	44	0	0	49	58	0	40	26	53	42	20	0	40	1	0
222-PAT-Cr-FB2_PF_(paired)_contig_2145	B	NA	NA	16.694	-7.29258	1.95456	-3.73106	0.000190678	0.0034276	9.57656	0	0	0	1.47125	0	0	1.42954	0	108.304	116.329	0	41.8599	0	0
CrematogasterSubCLCMeta_rep_c39274	B	PREDICTED: acyl-CoA desaturase-like	desaturase 1, isoform E [Drosophila melanogaster]	2743.86	-7.28771	1.69603	-4.29691	1.73194e-05	0.000449225	0	8	9	74.6351	13	56.1228	3	3	4	128590	51438.8	10	78.1661	89.0803	7
222-PAT-Cr-FB2_PF_(paired)_contig_14130	B	PREDICTED: tRNA-dihydrouridine(16/17) synthase	NA	16.5635	-7.28155	2.42776	-2.99928	0.00270617	0.0287269	1.11561	5.51364e-05	0	0	0	0	0	0	73.7221	0	177.022	0	45.6938	0	0
CrematogasterSubCLCMeta_s43281	B	PREDICTED: LOW QUALITY PROTEIN: uncharacterized protein LOC108747852	NA	429.582	-7.26558	1.5459	-4.69989	2.60306e-06	8.70845e-05	1710.38	9.97858	0	1894.57	922.238	17.0465	185.889	638.031	676.152	0	0	0	597.87	0	0
CrematogasterSubCLCMeta_c11467	B	PREDICTED: uncharacterized protein LOC105668987	NA	22.5703	-7.242	1.97275	-3.67102	0.000241584	0.00416315	68	0	0	0	27	1	46	0	0	196	0	0	4	0	0
CrematogasterSubCLCMeta_s44776	B	PREDICTED: methyltransferase-like protein 13	NA	16.0138	-7.23205	2.13233	-3.39162	0.000694806	0.00976417	134.127	0	0	0	52.5748	0	48.3647	0.731053	0	12.3862	0	0	0	0	0
CrematogasterSubCLCMeta_s60206	B	NA	NA	15.7654	-7.20925	2.09477	-3.44155	0.00057839	0.0084685	115.86	0	0	0	0	0	0	22.7508	1.51167e-08	66.7701	1.6244	0	30.4682	0	0
CrematogasterSubCLCMeta_s60744	B	PREDICTED: BAI1-associated protein 3-like isoform X1	NA	15.6782	-7.20158	1.77359	-4.06045	4.89783e-05	0.0010944	36.7091	0	0	0	0	0	10.5336	0	6.61061	112.169	33.7668	0	46.7712	0	0
CrematogasterSubCLCMeta_s44798	B	PREDICTED: acylamino-acid-releasing enzyme-like isoform X3	NA	228.036	-7.19489	0.976088	-7.37115	1.6916e-13	2.73782e-11	536.214	0	0	476.66	505.494	16.4649	485.881	451.317	442.923	137.792	198.599	0	324.907	0	0
CrematogasterSubCLCMeta_rep_c29165	B	PREDICTED: uncharacterized protein LOC105429143	NA	15.5379	-7.18881	1.63863	-4.3871	1.14872e-05	0.000313571	1.73642	0	0	0	58.6063	1.57885e-07	29.2744	32.8399	66.7988	1	0	0	57.5193	0	0
CrematogasterSubCLCMeta_rep_c31075	B	PREDICTED: sterol O-acyltransferase 1-like isoform X2	NA	30.2784	-7.1831	1.69026	-4.2497	2.14058e-05	0.000536343	0	0	0	45.1607	34.3709	0	99.5323	54.3587	52.1187	174.243	0	1.9852	0	0	0
CrematogasterSubCLCMeta_rep_c11193	B	PREDICTED: protein ALP1-like	NA	15.302	-7.16693	1.26777	-5.65317	1.57518e-08	9.68708e-07	26	0	0	57	54	0	39	6	15	0	11	0	37	0	0
CrematogasterSubCLCMeta_c36170	B	PREDICTED: uncharacterized protein LOC105205003	NA	67.1178	-7.15515	0.926738	-7.72079	1.15608e-14	2.22427e-12	157.558	0	5.42914	70.6015	196.246	0	60.3724	109.985	106.745	207.204	29.9429	0	97.988	0	0
CrematogasterSubCLCMeta_s52955	B	NA	NA	15.094	-7.14687	1.25929	-5.67532	1.38428e-08	8.66886e-07	9.85304	0	0	21.6026	42.3045	0	18.168	28.7343	53.4652	7.73561	0	0	58.0081	0	0
CrematogasterSubCLCMeta_s52302	B	PREDICTED: protein BUD31 homolog	NA	15.0276	-7.13997	2.0285	-3.51982	0.000431839	0.00668436	19.4394	0	0	0	85.0211	0	18.8001	80.7545	22.4429	0	0	0	0	0	0
CrematogasterSubCLCMeta_s60464	B	NA	NA	14.9768	-7.1357	2.01643	-3.53877	0.000401995	0.00630388	24.6443	0	0	0	0	0	20.502	0	0	108.137	66.7013	0	19.9394	0	0
CrematogasterSubCLCMeta_rep_c36172	B	thymus-specific serine protease-like	NA	14.9703	-7.13435	1.19159	-5.98724	2.13437e-09	1.64655e-07	28	0	0	36.745	45	0	43	17	25.1466	22	0	0	17	0	0
CrematogasterSubCLCMeta_s57588	B	PREDICTED: uncharacterized protein LOC103578557	NA	29.219	-7.13252	1.25334	-5.69082	1.26434e-08	8.00144e-07	26.3638	0	0	148.024	100.355	0	38.2086	0	12.927	36.273	59.3496	0	49.4804	0	2
76-PAR-Cr-FB2_PF_(paired)_contig_10375	B	PREDICTED: uncharacterized protein LOC105559041	NA	14.8557	-7.12386	1.71177	-4.16168	3.1591e-05	0.000747995	0	0	0	0	79.0943	0	26.1287	46.8863	43.7759	0	21.815	0	18.0498	0	0
CrematogasterSubCLCMeta_s59576	B	PREDICTED: putative fatty acyl-CoA reductase CG5065, partial	NA	14.6146	-7.10012	1.76522	-4.02224	5.76475e-05	0.00125191	0	0	0	21	31.0343	0	7.94852	0	0	117	21	0	31.0495	0	0
CrematogasterSubCLCMeta_s31204	B	PREDICTED: protein RRP5 homolog	NA	14.5686	-7.09519	1.68866	-4.20168	2.64942e-05	0.000640934	2.4262	0	0	5.73097	1	0	0	46.0545	62.0556	81.9791	25	0	0	0	0
CrematogasterSubCLCMeta_c10998	B	PREDICTED: uncharacterized protein LOC108760044, partial	NA	14.3814	-7.0785	1.65056	-4.28853	1.79856e-05	0.000463745	1	0	0	20	3	0	0	13	40	0	129	0	45	0	0
CrematogasterSubCLCMeta_rep_c24424	B	NA	NA	14.3709	-7.07568	1.19475	-5.9223	3.17477e-09	2.35646e-07	62.728	0	0	25	21.1195	0	19	23.7073	32.6108	0	21.7973	0	20.1884	0	0
CrematogasterSubCLCMeta_rep_c1768	B	PREDICTED: pre-mRNA 3'-end-processing factor FIP1	NA	14.192	-7.05798	1.77857	-3.96835	7.23732e-05	0.00152069	54.2242	0	0	0	114.26	0	15.8663	10.0857	13.4746	0	0	0	17.8512	0	0
CrematogasterSubCLCMeta_s43690	B	PREDICTED: chaoptin isoform X2	NA	86.9333	-7.04128	1.08092	-6.51416	7.30976e-11	7.67958e-09	280.217	0	0	137.727	241.39	0	195.052	106.32	132.047	0	120.566	5.15387	166.075	0	1.94202
CrematogasterSubCLCMeta_s43935	B	PREDICTED: luciferin 4-monooxygenase-like	NA	117.667	-7.03471	1.294	-5.43642	5.43607e-08	2.90006e-06	304.576	0	0	90.0766	242.201	0	208.468	364.173	22.5941	0	191.739	0	417.111	4.77949e-08	9.50705
CrematogasterSubCLCMeta_rep_c33779	B	PREDICTED: laccase-1-like isoform X1	NA	13.9011	-7.02803	1.99077	-3.5303	0.000415094	0.0064792	0	0	0	0	0	0	0	50.8978	16.7374	51.881	69.6646	0	31.5778	0	0
CrematogasterSubCLCMeta_s44983	B	PREDICTED: uncharacterized protein LOC105452160	NA	13.868	-7.02497	2.05928	-3.41137	0.000646382	0.00925193	16.2451	0	0	57.6284	93.87	0	0	3.46918	0	0	57.2445	0	0	0	0
CrematogasterSubCLCMeta_rep_c31844	B	PREDICTED: uncharacterized protein LOC105202897	NA	13.8535	-7.02379	2.05834	-3.41235	0.00064405	0.00923235	0	0	0	0	0	0	0	11.1571	108.892	3.93842	59.0859	0	53.1732	0	0
CrematogasterSubCLCMeta_s31707	B	PREDICTED: pre-mRNA-processing-splicing factor 8	NA	13.8095	-7.01853	2.36251	-2.97079	0.00297031	0.0309345	63.5641	0	0	1.82002e-07	124.297	0.273111	0.121784	0.000151462	0.0013893	18.2079	0	0	11.5367	0	0
CrematogasterSubCLCMeta_c14190	B	PREDICTED: uncharacterized protein LOC105462614	NA	13.8007	-7.01565	1.06258	-6.60249	4.04309e-11	4.47326e-09	34.0568	0	0	8.0785	32.937	0	17	40.4379	12.1556	31	34.1695	0	6.14891	0	0
222-PAT-Cr-FB2_PF_(paired)_contig_1446	B	PREDICTED: PRKR-interacting protein 1 homolog	NA	63.4637	-7.00949	1.30956	-5.35257	8.67144e-08	4.38209e-06	10.5142	0	0	154.392	2.18644e-07	0	37.9225	101.419	66.239	353.109	202.007	0	68.9999	5.35224	0
CrematogasterSubCLCMeta_s60510	B	PREDICTED: uncharacterized protein LOC108780192	NA	49.0648	-7.00412	0.964314	-7.26332	3.7769e-13	5.78357e-11	85.0086	0	0	15.2105	122.283	0	58.1769	100.078	89.5079	20.4625	215.622	3.11748	92.7248	0	1.00279
CrematogasterSubCLCMeta_rep_c36065	B	PREDICTED: fatty acid synthase-like	NA	26.5635	-6.99441	1.85823	-3.76401	0.000167211	0.00306919	35.0811	0	0	1.41404	267.039	0	0	0	19.6138	0	7	0	101.56	0	2.46332
222-PAT-Cr-FB2_PF_(paired)_contig_9102	B	PREDICTED: uncharacterized protein LOC105203549	NA	13.5599	-6.99266	2.01395	-3.47212	0.000516369	0.00771847	20.2881	0	0	11.0729	0	0	0	36.3124	56.3527	0	103.563	0	0	0	0
CrematogasterSubCLCMeta_s55490	B	NA	NA	60.2644	-6.96779	0.81226	-8.57828	9.63014e-18	2.97646e-15	91.4027	0	0	194.192	129.021	0	63.2776	92.7743	67.5997	94.2645	102.936	5.44767	113.018	0	0
76-PAR-Cr-FB2_PF_(paired)_contig_17882	B	PREDICTED: microphthalmia-associated transcription factor-like isoform X1	NA	13.3025	-6.96396	1.77586	-3.92145	8.80188e-05	0.00178902	5.67617	0	0	0.0982639	0	0	16.7502	30.183	21.0159	105.318	24.3353	0	0	0	0
CrematogasterSubCLCMeta_s60766	B	PREDICTED: mitotic checkpoint protein BUB3	NA	13.2743	-6.96151	1.76184	-3.95127	7.77383e-05	0.00160943	60.6231	0	0	52.9602	0	0	15.2209	5.33198	15.575	0	0	0	60.4012	0	0
CrematogasterSubCLCMeta_s59013	B	PREDICTED: peptidyl-tRNA hydrolase ICT1, mitochondrial-like	NA	13.2085	-6.95552	1.79471	-3.87556	0.000106378	0.00209895	0	0	0	0	46.7868	0	21.8302	7	42.8359	0	106.561	0	3.2949	0	0
CrematogasterSubCLCMeta_s59997	B	PREDICTED: uncharacterized mitochondrial protein AtMg00810-like	NA	13.1889	-6.95145	2.04598	-3.39761	0.000679771	0.00960643	29.6577	0	0	0	9.16196	0	0	45.5271	0	96.667	12.8496	0	0	0	0
CrematogasterSubCLCMeta_rep_c35869	B	PREDICTED: uncharacterized protein LOC105570065	NA	35.3037	-6.94369	1.21843	-5.69889	1.20589e-08	7.69247e-07	0	0	2.70235	73.828	24.2078	0	46.9645	62.8466	106.861	42.1132	95.1011	0	117.796	0	0
CrematogasterSubCLCMeta_c4866	B	PREDICTED: uncharacterized protein LOC105450919	NA	25.6437	-6.94336	0.977018	-7.10668	1.18866e-12	1.66507e-10	21	0	0	56	96	0	23	32	70	25	32	1	54	0	1
CrematogasterSubCLCMeta_s55705	B	PREDICTED: manganese-transporting ATPase 13A1	NA	13.045	-6.93601	2.08718	-3.32314	0.000890088	0.011911	0	0	0	24.3933	65.4096	0	0	10.3873	2.96851	96.5223	0	0	0	0	0
CrematogasterSubCLCMeta_s57096	B	PREDICTED: cytochrome P450 6k1-like isoform X1	NA	362.513	-6.93364	0.53627	-12.9294	3.07271e-38	5.88817e-35	651.036	3.22241	14.1849	705.107	1029.33	0	680.663	580.12	582.414	480.982	256.489	2.68328	706.628	8	3.32722
CrematogasterSubCLCMeta_s44559	B	uncharacterized protein LOC110860780	NA	13.0302	-6.93332	1.09246	-6.34652	2.20246e-10	2.0996e-08	10.7837	0	0	35.6421	39.3533	0	18.0116	22.022	32.13	28	1.69454	0	15.1	0	0
CrematogasterSubCLCMeta_c11476	B	PREDICTED: uncharacterized protein LOC105555714	NA	12.845	-6.91358	1.2753	-5.42113	5.92233e-08	3.13158e-06	27	0	0	44	47	0	13	7	6	29	0	0	28	0	0
CrematogasterSubCLCMeta_s55471	B	PREDICTED: apoptogenic protein 1, mitochondrial	NA	12.7476	-6.90337	2.10094	-3.28585	0.00101673	0.0132613	0	0	0	30.1387	0	0	65.8689	2.19076	101.745	0	0	0	6.84879	0	0
CrematogasterSubCLCMeta_c8840	B	retrovirus-related Pol polyprotein from transposon TNT 1-94	NA	12.6769	-6.89599	1.19226	-5.78395	7.29659e-09	4.97738e-07	16	0	0	0	31	0	16	12	19	42	47	0	23	0	0
CrematogasterSubCLCMeta_rep_c7996	B	PREDICTED: uncharacterized protein LOC105557094	NA	140.48	-6.89125	1.78828	-3.85355	0.000116415	0.00226343	379	0	10	1396.31	0	0	377.209	1.05862	3.00181	1	0	0	1	1	2
CrematogasterSubCLCMeta_rep_c3900	B	PREDICTED: tubulin beta-1 chain	NA	1145.37	-6.87834	1.09962	-6.25523	3.9694e-10	3.54119e-08	2490.51	0	73.814	888.783	16.5624	8.66219	695.986	3535.55	2237.89	26.4416	3638.79	9.15943	4775.52	0	14.7555
CrematogasterSubCLCMeta_c9336	B	PREDICTED: uncharacterized protein LOC105556409	NA	12.5121	-6.87554	1.2269	-5.60398	2.09483e-08	1.24358e-06	51	0	0	23	34	0	31	19	14	0	9	0	15	0	0
CrematogasterSubCLCMeta_s43587	B	PREDICTED: uncharacterized protein LOC105568957 isoform X2	NA	12.505	-6.87541	1.46425	-4.69551	2.6594e-06	8.8783e-05	58.4207	0	0	39.5828	12.8107	0	30.7842	8.68147	17.8087	0	30.0288	0	0	0	0
CrematogasterSubCLCMeta_s44961	B	PREDICTED: uncharacterized protein LOC105200675 isoform X1	NA	12.4679	-6.87224	1.66621	-4.12447	3.71588e-05	0.000862484	0	0	0	22.2221	26.0897	0	34.395	0	39.0708	0	54.5654	0	35.2002	0	0
CrematogasterSubCLCMeta_c19660	B	PREDICTED: uncharacterized protein LOC106745117, partial	NA	12.467	-6.87138	2.36841	-2.90126	0.00371667	0.0367047	0	0	0	0	111	0	47	0	0	0	46	0	4	0	0
CrematogasterSubCLCMeta_s43713	B	PREDICTED: hemolymph lipopolysaccharide-binding protein-like	NA	1318.55	-6.869	1.6827	-4.08214	4.46236e-05	0.00101221	2.29088	38.634	23.2643	0	6603.42	0	10328.5	2.63268	9.4797	0	4823.54	16.7776	11.0919	18.9215	14.1854
CrematogasterSubCLCMeta_s44936	B	PREDICTED: uncharacterized protein LOC105673664 isoform X1	NA	12.4176	-6.86494	1.37923	-4.97737	6.44552e-07	2.60566e-05	101.983	0	0	6.61242	26.1563	0	6.42692	6.70752	22.9417	0	10.9693	0	12.5303	0	0
CrematogasterSubCLCMeta_c25781	B	PREDICTED: uncharacterized protein LOC105831680	NA	256.803	-6.8625	0.799923	-8.57895	9.57452e-18	2.97646e-15	356.599	9.64869	8.16862	214.019	204.988	0	334.162	494.064	337.35	153.772	1957.11	0	229.855	1.2096	3.47048
CrematogasterSubCLCMeta_s44462	B	PREDICTED: pre-mRNA 3' end processing protein WDR33	NA	12.3369	-6.85596	2.35233	-2.91454	0.00356218	0.0355676	109.442	0	0	23.753	9.79724	0	0	0	0	0.216734	56.3351	0	0	0	0
CrematogasterSubCLCMeta_s53983	B	NA	NA	12.3134	-6.8537	1.43399	-4.77947	1.75755e-06	6.21219e-05	31.0833	2.8681e-08	0	34.8965	0	0	25.8276	19.1008	14.6236	0	60.3505	0	14.702	0	0
CrematogasterSubCLCMeta_rep_c27475	B	PREDICTED: dolichyl-diphosphooligosaccharide--protein glycosyltransferase 48 kDa subunit	NA	1115.93	-6.8513	0.908438	-7.54185	4.63347e-14	8.06633e-12	3390.88	0	15.8975	2382.98	1949.77	6.57265e-05	1581.14	3344.64	2073.77	530.39	1910.69	19.5185	32.958	44.7517	20.9908
CrematogasterSubCLCMeta_rep_c11287	B	PREDICTED: probable cytochrome P450 6d4, partial	NA	12.2818	-6.85012	1.09348	-6.26452	3.73967e-10	3.3676e-08	5	0	0	18	56	0	15	9	21	24	8	0	41	0	0
CrematogasterSubCLCMeta_rep_c31341	B	PREDICTED: protein hu-li tai shao isoform X7	NA	33.5529	-6.84454	1.24537	-5.49598	3.88556e-08	2.1396e-06	54.6085	0	0	29.2884	66.0437	0	120.268	75.0369	13.6997	0	104.75	2.88156	73.1457	0	0
CrematogasterSubCLCMeta_s32945	B	NA	NA	23.7689	-6.83267	1.92325	-3.55267	0.000381347	0.0060288	0	0	0	0	99.4565	2.02867	123.68	0	86.2836	0	74.775	0	10.8066	0	0
CrematogasterSubCLCMeta_s60185	B	NA	NA	12.1295	-6.83215	1.27279	-5.36787	7.96717e-08	4.06046e-06	0	0	0	33.9732	21.6696	0	19.6284	5.49547	11.6414	46.3534	49.5989	0	7.75763	0	0
CrematogasterSubCLCMeta_s43535	B	PREDICTED: LDLR chaperone boca	NA	81.723	-6.83123	1.49236	-4.57748	4.70611e-06	0.000145174	386.554	0	0	0	281.959	0	0.0586187	72.5788	176.611	107.054	115.445	0	151.978	0	7.84057
CrematogasterSubCLCMeta_c820	B	PREDICTED: uncharacterized protein LOC106694005	NA	43.69	-6.82673	0.84697	-8.06018	7.61853e-16	1.80684e-13	105	0	1	107	78	0	55	71	46	32	92	3	106	0	0
76-PAR-Cr-FB2_PF_(paired)_contig_3870	B	PREDICTED: vacuolar protein sorting-associated protein 37B isoform X1	NA	395.09	-6.82117	0.881182	-7.74094	9.86845e-15	1.93757e-12	467.457	0	0	644.823	793.869	31.6021	761.052	775.949	514.007	947.099	481.629	0	772.917	2.02774	2.44429
CrematogasterSubCLCMeta_rep_c36553	B	PREDICTED: 60S ribosomal protein L18a	NA	2338.72	-6.8153	1.12147	-6.0771	1.22378e-09	9.9707e-08	5071.71	0	146.03	25.1388	6358.39	25.3686	7296.98	2856.72	5486.61	5780.37	3862.11	6.86528	63.8024	0	50.9993
CrematogasterSubCLCMeta_c30875	B	PREDICTED: fanconi-associated nuclease 1-like isoform X2	NA	11.9894	-6.81484	1.13871	-5.98473	2.16753e-09	1.6641e-07	36	0	0	20	27	0	31	11	28	1	6	0	31	0	0
CrematogasterSubCLCMeta_s52186	B	PREDICTED: uncharacterized protein LOC106746604	NA	11.9946	-6.81241	1.20709	-5.64367	1.66464e-08	1.0159e-06	57.3844	0	0	2.74445	10.874	0	15	46.1713	7.40326	22.5355	14.7093	0	4	0	0
CrematogasterSubCLCMeta_s58482	B	PREDICTED: acyl-CoA Delta(11) desaturase	NA	11.9285	-6.80714	2.34539	-2.90235	0.0037037	0.0365992	0	0	0	60	0	0	69	0	0	48	0	0	8.02333	0	0
222-PAT-Cr-FB2_PF_(paired)_contig_4705	B	NA	NA	11.7097	-6.78073	1.72244	-3.9367	8.26099e-05	0.00169418	55.3915	0	0	23.7987	9.87523	0	0	24.7822	0	0	61.6099	0	12.5888	0	0
CrematogasterSubCLCMeta_rep_c28832	B	PREDICTED: uncharacterized protein LOC105848702	NA	69.9115	-6.77884	1.66105	-4.08107	4.48288e-05	0.00101497	145.285	0	1	1	0	1	0	191.587	0	38	687.57	0	113.466	0	5
CrematogasterSubCLCMeta_rep_c34701	B	PREDICTED: tenascin-like isoform X2	NA	40.1927	-6.77574	1.34239	-5.04753	4.47563e-07	1.90252e-05	86.53	0	0	126	9	0	72	106	177	0	6	0	37	0	4
CrematogasterSubCLCMeta_s44945	B	PREDICTED: protein inturned	NA	16.2662	-6.76838	1.22386	-5.53037	3.19557e-08	1.80522e-06	18	0	0	78.6975	30.6076	0	23.4552	22.8809	6.23565	0	51.8619	0	29.3006	1.0109	0
CrematogasterSubCLCMeta_rep_c26750	B	NA	NA	11.5927	-6.76602	1.99401	-3.39317	0.000690884	0.00972332	0	0	0	37.1062	27.3904	0	0	0	0	77.2518	25.398	0	17.2208	0	0
CrematogasterSubCLCMeta_s57693	B	NA	NA	11.4742	-6.7518	2.3722	-2.84622	0.00442413	0.0418041	0	0	0	10.7483	98.5885	0	0	7.36621	0	0	78.0487	0	0	0	0
CrematogasterSubCLCMeta_s52299	B	NA	NA	16.0315	-6.74825	1.62916	-4.14217	3.44036e-05	0.000806086	0	0	0	0	10	0	33.5206	0	60.8749	43.694	28	0	87.372	0	1
CrematogasterSubCLCMeta_s44249	B	NA	NA	11.3685	-6.73753	2.32981	-2.89189	0.00382937	0.0375391	50.0379	0	0	32.0619	0	0	18.4766	0	0	71.5071	0	0	0	0	0
59-PAR-Cr-FB2_PF_(paired)_contig_3024	B	NA	NA	11.2795	-6.72661	1.97349	-3.40848	0.000653255	0.00931876	37	0	0	0	0	0	56.4174	23.6598	0	0	27.1897	0	36.2856	0	0
CrematogasterSubCLCMeta_c21447	B	PREDICTED: uncharacterized protein LOC105455117	NA	11.2492	-6.72241	1.47912	-4.54488	5.49654e-06	0.000167083	35	0	0	0	19	0	0	9	37	52	17	0	8	0	0
CrematogasterSubCLCMeta_rep_c23335	B	PREDICTED: putative nuclease HARBI1	NA	11.2089	-6.71618	1.55557	-4.31751	1.57799e-05	0.000413096	0	0	0	0	6.32074	0	15.7016	33.8621	10.5796	82.0796	10.1671	0	9.52844	0	0
CrematogasterSubCLCMeta_rep_c25246	B	PREDICTED: uncharacterized protein LOC105559986	NA	11.0629	-6.70142	1.35708	-4.93813	7.8877e-07	3.10498e-05	10.4172	0	0	29.0536	6.02803	0	15.6618	4.35501	7.21972	0	95.8056	0	23.0417	0	0
CrematogasterSubCLCMeta_s55598	B	NA	NA	11.0735	-6.69968	1.46062	-4.58688	4.49922e-06	0.000139692	32	0	0	42.1036	12.2789	0	20	16	43	0	9	0	0	0	0
CrematogasterSubCLCMeta_rep_c33771	B	PREDICTED: short-chain dehydrogenase/reductase family 16C member 6-like	NA	466.89	-6.69338	1.05009	-6.3741	1.84046e-10	1.77406e-08	587.842	0	0	679.846	769.8	38.9046	579.903	1218.36	1419.6	805.98	98.4512	0	1052.18	0	8.33685
CrematogasterSubCLCMeta_s60232	B	PREDICTED: maltase 1-like	NA	10.9533	-6.68421	2.00596	-3.33219	0.000861668	0.0116344	38.4499	0	0	73.2145	0	0	28.2904	0	0	0	9.2332	0	25.4526	0	0
CrematogasterSubCLCMeta_c26515	B	PREDICTED: uncharacterized protein LOC105197121	NA	68.4734	-6.67557	0.719651	-9.27612	1.75766e-20	8.17515e-18	77.5425	0	0	102.733	103.871	0	115.073	98.1927	68.9699	222.216	159.305	5	132.296	0	1.50555
CrematogasterSubCLCMeta_rep_c19922	B	PREDICTED: uncharacterized protein LOC105278576 isoform X10	NA	10.8419	-6.67176	1.10823	-6.02021	1.74188e-09	1.37704e-07	12.8095	0	0	13.6264	15.9127	0	12.5249	2.08082	27.3282	36.6715	48.3764	0	7.50751	0	0
CrematogasterSubCLCMeta_rep_c2225	B	PREDICTED: chitinase-like protein Idgf4 isoform X2	NA	12266.2	-6.6694	0.763695	-8.73307	2.47849e-18	8.73065e-16	704.621	65.6212	229.666	15840.3	1681.99	34.2408	22025.6	45246.5	45618.1	19040.7	9318	273.877	29863.8	158.623	533.799
CrematogasterSubCLCMeta_s44456	B	PREDICTED: homologous-pairing protein 2 homolog	NA	10.798	-6.66415	2.30512	-2.89101	0.00384001	0.0376217	30.8991	0	0	0	67	0	0	0	0	0	46.425	0.00114327	37.1962	0	0
CrematogasterSubCLCMeta_s57892	B	PREDICTED: probable phospholipid-transporting ATPase IIA isoform X3	NA	10.7654	-6.65839	1.44702	-4.60146	4.19542e-06	0.000131366	20.0336	0	0	46.3861	34.7099	0	19.0882	19.2375	0	12	0	0	15.4864	0	0
CrematogasterSubCLCMeta_rep_c28612	B	PREDICTED: transmembrane protein 209	NA	10.7618	-6.6577	1.71042	-3.89243	9.92458e-05	0.00197531	30.3945	0	0	23.9137	11.0101	0	15.9787	48.4034	33.0237	0	0	0	0	0	0
CrematogasterSubCLCMeta_rep_c30015	B	PREDICTED: uncharacterized protein LOC108755007 isoform X1	NA	2270.55	-6.64358	0.863908	-7.69015	1.46959e-14	2.76093e-12	3462.32	37.3591	22.1347	19.9055	35.3269	52.1864	4102.84	4357.39	9347.19	1232.94	4882.53	27.8801	9201.67	25.153	70.7621
CrematogasterSubCLCMeta_s57406	B	PREDICTED: uncharacterized protein LOC105261961	NA	14.9246	-6.64299	1.43692	-4.62307	3.78106e-06	0.000120599	51.3304	0.996168	0	10.3425	28.6674	0	0	14.5596	12.392	29.7394	98.1427	0	0	0	0
CrematogasterSubCLCMeta_rep_c35407	B	putative integrase core domain protein	NA	137.839	-6.63748	0.955483	-6.94673	3.7385e-12	4.93389e-10	151.132	0	0	370.771	333.792	0	201.2	94.3346	206.821	206	175.119	0	460.41	14	0
CrematogasterSubCLCMeta_rep_c23603	B	PREDICTED: poly(A) RNA polymerase gld-2 homolog A-like isoform X4	NA	10.5742	-6.63299	1.63929	-4.04627	5.20405e-05	0.00114996	0	0	0	67.3979	6.08193	0	1.01264	38.9751	5.86576	0	39.4447	0	8.06635	0	0
CrematogasterSubCLCMeta_s52678	B	PREDICTED: striatin-interacting protein 1 isoform X2	NA	10.5275	-6.62743	1.25398	-5.28513	1.25617e-07	6.09104e-06	49.4415	0	0	6.72519	18.65	0	32.4799	11.2462	13.6912	0	28.7875	0	8.27052	0	0
59-PAR-Cr-FB2_PF_(paired)_contig_21219	B	NA	NA	10.4902	-6.62226	1.35594	-4.88388	1.04017e-06	3.93925e-05	29.0607	0	0	2	37.2294	0	6.09718	10.7424	26.8203	6.00781	0	0	49.63	0	0
CrematogasterSubCLCMeta_rep_c28318	B	PREDICTED: uncharacterized protein LOC108688626 isoform X1	NA	10.4869	-6.62185	1.81652	-3.64534	0.000267038	0.00452049	12	0	0	1	24	0	73.9514	15.9737	0.27091	0	44	0	0	0	0
CrematogasterSubCLCMeta_rep_c11465	B	PREDICTED: uncharacterized protein LOC105198409	NA	10.3797	-6.60686	2.31338	-2.85593	0.00429113	0.0407807	27.3697	0	0	0	0	0	0	0	61.1403	26.7768	0	0	53.2232	0	0
CrematogasterSubCLCMeta_rep_c36226	B	PREDICTED: uncharacterized protein LOC106709547	NA	595.858	-6.59656	0.432803	-15.2415	1.8755e-52	7.48745e-49	1030.34	15.7585	13	1148.43	1458.21	0	1300.78	556.903	886.274	1046.29	946.329	14.1586	1062.83	7.1151	13.2354
CrematogasterSubCLCMeta_rep_c24312	B	PREDICTED: uncharacterized protein LOC105556755	NA	14.385	-6.58994	1.60809	-4.09798	4.16773e-05	0.000951686	62.2229	0	0	0	41.2528	0	47.4422	23.859	15.9792	0	37.8581	0	0	1	0
CrematogasterSubCLCMeta_s53243	B	PREDICTED: uncharacterized protein LOC105563963 isoform X2	NA	45.4886	-6.58965	1.17333	-5.6162	1.952e-08	1.17333e-06	14.7574	0	0	0	25.9967	0	183.963	57.376	223.29	62	99.4422	0	69.419	1.6985	3.16694
CrematogasterSubCLCMeta_s60473	B	PREDICTED: LOW QUALITY PROTEIN: nuclear factor NF-kappa-B p110 subunit	NA	55.9496	-6.57519	1.94372	-3.38279	0.000717546	0.0100279	7.04872	0	0.761459	53.506	0	0	0	62.1845	0	0	783.718	0	93.9688	5.01996	0
CrematogasterSubCLCMeta_c14630	B	PREDICTED: uncharacterized protein LOC105206529	NA	10.1195	-6.57059	2.13921	-3.0715	0.00212984	0.0238397	0	0	0	20	19	0	0	3	2	0	0	0	123.93	0	0
CrematogasterSubCLCMeta_rep_c27380	B	PREDICTED: pancreatic lipase-related protein 2-like	NA	607.351	-6.56425	1.67849	-3.9108	9.19895e-05	0.00185261	0	0	0	1977.75	1374.55	60.2097	241.529	2224.93	2943.43	0	626.204	2.01095	0	2.4241	2.0686
CrematogasterSubCLCMeta_s43571	B	PREDICTED: uncharacterized protein LOC105457806	NA	79.2535	-6.55609	0.910432	-7.20108	5.97368e-13	8.80557e-11	146.571	0.0250034	7	183.698	237.219	0.0208334	75.5236	51.0079	118.867	330	32.4613	1.59993	46.989	0	0
CrematogasterSubCLCMeta_rep_c38656	B	PREDICTED: cytochrome P450 4C1-like isoform X2	NA	9.89877	-6.53627	1.34943	-4.84371	1.27435e-06	4.69255e-05	10.3197	0	0	28	15	0	14	12.9325	3	61	0	0	6	0	0
CrematogasterSubCLCMeta_s52546	B	PREDICTED: transportin-3	NA	9.83501	-6.52988	1.43747	-4.54262	5.55587e-06	0.000168459	15.1997	0	0	11.3702	28.394	0	21.8375	17.974	12.6188	0	55.3431	0	0	0	0
CrematogasterSubCLCMeta_s43352	B	PREDICTED: putative transcription factor SOX-15 isoform X2	NA	339.199	-6.51549	1.31165	-4.9674	6.78571e-07	2.72264e-05	467.422	0	0	1732.79	847.192	37.8194	820.803	284.157	108.291	676.876	297.902	0	10.0089	0	0
CrematogasterSubCLCMeta_rep_c28334	B	PREDICTED: uncharacterized protein LOC105153752	NA	9.68002	-6.50544	1.71296	-3.79778	0.000145997	0.00272575	30.5696	0	0	48.0624	8.9677	0	0	17.7723	31.039	0	0	0	13.3305	0	0
CrematogasterSubCLCMeta_s44507	B	NA	NA	9.67366	-6.50449	1.99494	-3.26049	0.0011122	0.0143001	60.237	0	0	17.8382	33	0	21.1321	15.9888	0	0	0	0	0	0	0
CrematogasterSubCLCMeta_s35492	B	PREDICTED: chymotrypsin inhibitor-like	NA	9.63739	-6.50117	1.51846	-4.28142	1.85702e-05	0.000475999	603.637	0	0	5	14.5263	0	19.6561	0	45.0572	0	12.4373	0	58.693	0	0
CrematogasterSubCLCMeta_rep_c27502	B	PREDICTED: LYR motif-containing protein 4B	NA	52.5675	-6.48943	1.24081	-5.23001	1.69501e-07	7.98453e-06	133	0	0	160	34.5128	5.57791	191	98.2468	94.6054	0	93.357	0	17.4964	0	0
CrematogasterSubCLCMeta_rep_c34491	B	PREDICTED: uncharacterized protein LOC108609589	NA	9.53097	-6.48491	1.16069	-5.58712	2.3087e-08	1.36043e-06	2	0	0	7	34.8659	0	33.7438	15.3785	7.80356	12	37	0	5.3949	0	0
CrematogasterSubCLCMeta_s56361	B	NA	NA	9.48906	-6.47818	1.43019	-4.5296	5.90956e-06	0.000177387	0	0	0	36.3329	21.7443	0	20.0583	8.49142	33.0429	0	25.4372	0	11.1328	0	0
CrematogasterSubCLCMeta_s44133	B	PREDICTED: putative fatty acyl-CoA reductase CG5065	uncharacterized protein Dmel_CG13091, isoform A [Drosophila melanogaster] Dembeck FA reductase	4179	-6.47641	0.489539	-13.2296	5.91933e-40	1.28899e-36	5742.84	71.5537	125.148	11314.6	8759.84	32.4443	3763.04	9796.39	4711.95	10995.5	2640.08	149.323	6204.06	25.9391	84.7564
CrematogasterSubCLCMeta_s57270	B	NA	NA	9.47754	-6.47532	1.81463	-3.56839	0.000359181	0.00574917	0	0	0	0	20.7719	0	0	33.9837	68.8531	1.50293	3.95375	0	19.6473	0	0
CrematogasterSubCLCMeta_s55363	B	protein ALP1-like isoform X1	NA	51.3418	-6.46882	1.5134	-4.27438	1.91674e-05	0.000488432	57.5918	0	1.08516	7.56233	258.763	4.55247	0	204.086	43.9438	5.26945	0	0	212.209	0	0
CrematogasterSubCLCMeta_rep_c26873	B	PREDICTED: uncharacterized protein LOC105561956 isoform X1	NA	9.43012	-6.46666	0.976087	-6.62509	3.47032e-11	3.87535e-09	27.2266	0	0	23.9881	18.0037	0	10.4079	12.4861	11.4749	16.7988	19.0237	0	11.3723	0	0
CrematogasterSubCLCMeta_s57010	B	PREDICTED: 60S acidic ribosomal protein P0	NA	10124.4	-6.46414	1.16404	-5.5532	2.80483e-08	1.60923e-06	23120.4	0	951.494	22042.8	12833.7	18.4409	43.268	25367.2	36.5317	23432.8	22498.1	159.567	27785.8	43.8458	85.3544
CrematogasterSubCLCMeta_rep_c4374	B	PREDICTED: proteasome subunit beta type-1	NA	955.892	-6.4587	0.326963	-19.7537	7.46195e-87	8.937e-83	1909	10.8084	17.1557	2210.18	1628.91	10.5415	1296.38	1618.22	1460.8	1968.96	1255.07	36.0015	1535.37	17.3001	21.1364
CrematogasterSubCLCMeta_s58592	B	PREDICTED: uncharacterized protein LOC105180667	NA	9.33769	-6.4559	1.8109	-3.56501	0.000363841	0.00580824	2.01862	0	0	0	5.31774	0	21.5863	0	45.5389	0	79.1374	0	10.1	0	0
CrematogasterSubCLCMeta_s60325	B	PREDICTED: oxidation resistance protein 1 isoform X5	NA	13.0981	-6.45386	1.87944	-3.43392	0.00059491	0.00867591	62.6428	0	0	69.5496	12.7595	0	0	29.6578	0	0	0	1.35559	22.4672	0	0
CrematogasterSubCLCMeta_s43297	B	PREDICTED: ubiquitin carboxyl-terminal hydrolase 20	NA	162.392	-6.45236	2.16529	-2.9799	0.00288338	0.0302131	556.157	0	0	1221.73	0	18.7281	0	120.827	0.0752214	0	532.992	0	134.15	0	0
CrematogasterSubCLCMeta_rep_c39270	B	PREDICTED: actin, alpha skeletal muscle	NA	2938.07	-6.45205	0.952402	-6.7745	1.24834e-11	1.51787e-09	4013.11	0	162.255	2596.6	1582.23	149.2	6063.33	5656.61	10443.4	9054.13	96.397	9.4571	5827.92	30.5006	5.47224
CrematogasterSubCLCMeta_c949	B	PREDICTED: uncharacterized protein LOC108763052	NA	9.31617	-6.4483	1.27563	-5.05498	4.30433e-07	1.83622e-05	15	0	0	0	13	0	24	29	15	35	7	0	4	0	0
CrematogasterSubCLCMeta_s60578	B	PREDICTED: protein yellow-like	NA	49.7523	-6.44033	1.50436	-4.2811	1.85969e-05	0.000476428	33.0701	0	0	0	0	0	14.5211	98.8921	210.995	171.861	195.557	6.3315	72.812	0	0
CrematogasterSubCLCMeta_s60168	B	PREDICTED: uncharacterized protein LOC105840982	NA	9.20061	-6.43103	1.06334	-6.04794	1.46705e-09	1.17528e-07	33.7169	0	0	22.174	22.6016	0	15.4112	6.42603	13.1542	17.417	5.00177	0	9.04711	0	0
59-PAR-Cr-FB2_PF_(paired)_contig_2256	B	NA	NA	47.9927	-6.43037	1.18936	-5.40656	6.42473e-08	3.34554e-06	67.1524	0	6.48635	36.5475	106.048	0	113.517	77.8398	143.856	141.841	0	0	53.0598	0	0
CrematogasterSubCLCMeta_c7710	B	uncharacterized protein LOC109862308	NA	9.13619	-6.42472	1.08486	-5.92215	3.17756e-09	2.35646e-07	11.539	0	0	14	7	0	6	6	8	30	35.0588	0	31.0002	0	0
CrematogasterSubCLCMeta_s45042	B	PREDICTED: CTP synthase isoform X2	NA	9.13439	-6.42163	2.02396	-3.17281	0.00150969	0.0182454	55.8079	0	0	10.0713	45.7935	0	0	17.7187	0	8.82066	0	0	0	0	0
CrematogasterSubCLCMeta_rep_c29901	B	PREDICTED: S-methyl-5'-thioadenosine phosphorylase-like	NA	695.527	-6.40534	0.738326	-8.67549	4.11763e-18	1.37162e-15	1312.94	0	16.9325	1009.64	1185.43	46.8756	942.344	1276	1271.98	1189.42	1663.42	2.71963	1129.4	18.1964	0
CrematogasterSubCLCMeta_s59574	B	hypothetical protein T265_06416	NA	9.00606	-6.40295	1.75693	-3.64439	0.000268031	0.00453249	4.03562	0	0	35.4529	28.6675	0	0	4.25045	28.7986	0	50.0498	0	0	0	0
CrematogasterSubCLCMeta_rep_c35433	B	muscle-specific protein 20	NA	2647.47	-6.40008	1.19053	-5.37583	7.62309e-08	3.90588e-06	26234	76.5786	100.325	3217.59	3251.3	0	3972.46	186.553	216.215	496.503	177.95	61.2137	2813.11	77.0708	0
CrematogasterSubCLCMeta_rep_c26055	B	PREDICTED: proteasome subunit beta type-6	NA	860.819	-6.39257	1.2278	-5.20654	1.92396e-07	8.92164e-06	2377.08	0	0	2567.33	2488	6.24642	1892	28.6006	2130.56	0	416.708	4.98284	1805.57	30.7667	69.3143
CrematogasterSubCLCMeta_rep_c38849	B	PREDICTED: putative neutral sphingomyelinase	NA	8.87676	-6.38134	2.01069	-3.17371	0.00150505	0.018203	32.7418	0	0	4.27112	44.6866	0	39.117	0	0	0	23.1653	0	0	0	0
CrematogasterSubCLCMeta_s59406	B	NA	NA	8.88075	-6.38016	1.22017	-5.22892	1.70507e-07	8.02404e-06	11.6783	0	0	16.1103	29.714	0	5.23457	15.2466	20.4246	24.7158	0	0	15.073	0	0
CrematogasterSubCLCMeta_rep_c39824	B	PREDICTED: uncharacterized protein LOC105839093	NA	8.86314	-6.37934	1.50485	-4.23918	2.24336e-05	0.000557721	14	0	0	0	81	0	2	1	2	18	12	0	13	0	0
CrematogasterSubCLCMeta_rep_c15419	B	PREDICTED: uncharacterized protein LOC106653922 isoform X1	NA	12.4081	-6.37525	1.49859	-4.25415	2.09841e-05	0.000526603	36	0	0	13	0	0	4	37	3	48	0	0	46	0	1
222-PAT-Cr-FB2_PF_(paired)_contig_38123	B	PREDICTED: uncharacterized protein LOC100207339	NA	8.8288	-6.3722	1.70352	-3.7406	0.00018358	0.00332379	0	0	0	33.0877	15.2353	0	25.2803	34.126	20.4487	0	0	0	7.7563	0	0
CrematogasterSubCLCMeta_s60554	B	NA	NA	17.272	-6.36869	1.25581	-5.07136	3.94973e-07	1.70009e-05	53.4898	0	0	55.782	11.9669	2	68.8668	12.5887	11.345	0	15.5973	0	42.2226	0	0
CrematogasterSubCLCMeta_s58049	B	PREDICTED: voltage-dependent T-type calcium channel subunit alpha-1G-like	NA	8.78045	-6.36549	1.71417	-3.71344	0.000204459	0.0036144	20	0	0	8.15658	41.7785	0	41.2305	9.34882	0	0	20.9558	0	0	0	0
CrematogasterSubCLCMeta_rep_c26247	B	PREDICTED: uncharacterized protein LOC105144108	NA	8.76767	-6.36267	1.51577	-4.19764	2.69711e-05	0.000650934	31.4546	0	0	31.4749	20.3151	0	36.0316	6.78569	8.54693	0	2.72842	0	0	0	0
CrematogasterSubCLCMeta_s57725	B	NA	NA	8.75323	-6.36098	1.30408	-4.87775	1.073e-06	4.05397e-05	0	0	0	10.8703	28.5063	0	3.6782	11.5125	38.1869	26.3642	16.8489	0	2.99824	0	0
CrematogasterSubCLCMeta_s43403	B	PREDICTED: uncharacterized protein LOC105849513, partial	NA	8.65732	-6.34525	1.5548	-4.08107	4.48297e-05	0.00101497	0	0	0	65.038	24.9771	0	12.2614	1.59298	14.0034	0	13.91	0	6.93256	0	0
CrematogasterSubCLCMeta_s54316	B	NA	NA	8.66911	-6.3449	1.35969	-4.66642	3.06487e-06	0.00010043	24.3839	0	0	6.09177	28.4781	0	10.1375	11.9557	5.59653	44.4109	0	0	1.80739	0	0
CrematogasterSubCLCMeta_rep_c37857	B	PREDICTED: very-long-chain 3-oxoacyl-CoA reductase	NA	12504.8	-6.33681	0.739703	-8.56669	1.06499e-17	3.27056e-15	26535.8	67.7271	58.0894	30632.4	8855.14	1229.77	17121.1	30678.4	16379.3	33104	9338.02	32.4807	17894	71.8211	128.061
CrematogasterSubCLCMeta_rep_c11830	B	PREDICTED: elongation of very long chain fatty acids protein AAEL008004-like	uncharacterized protein Dmel_CG18609 [Drosophila melanogaster] Dembeck FA Elongase	81.4098	-6.33528	1.7187	-3.6861	0.000227717	0.0039598	91.1288	0	10	0	448.183	1	0	66.5227	27.5271	54.8892	0	0	622.644	0	0
CrematogasterSubCLCMeta_s52256	B	PREDICTED: hormone-sensitive lipase isoform X2	NA	95.4979	-6.32841	1.43782	-4.40139	1.07562e-05	0.000295807	0	0	0	22.1729	376.297	1.82012	628.317	36.7033	388.114	30.2096	51.5559	0	0	1.40297	9.81607
76-PAR-Cr-FB2_PF_(paired)_contig_10369	B	PREDICTED: uncharacterized protein LOC105205270 isoform X2	NA	12.0224	-6.32828	2.15581	-2.93545	0.00333066	0.0337555	10.0202	0.570252	0	44.2608	0	0	70.6561	0	0	59.3977	0	0	0.00148983	0	0
CrematogasterSubCLCMeta_s56346	B	PREDICTED: DNA-directed RNA polymerase I subunit RPA2 isoform X3	NA	8.5578	-6.32754	1.42948	-4.42645	9.57959e-06	0.000269641	0	0	0	25.9429	32.5282	0	15.551	15.057	0.0330087	21.5786	10.6677	0	11.3302	0	0
CrematogasterSubCLCMeta_s57801	B	PREDICTED: uncharacterized protein LOC105569853	NA	8.52851	-6.32391	1.69272	-3.73594	0.000187013	0.00337522	16.7113	0	0	32.0428	0	0	18.181	11.931	12.0348	0	49.0193	0	0	0	0
CrematogasterSubCLCMeta_s60654	B	PREDICTED: cytochrome c oxidase assembly factor 5	NA	8.49736	-6.31894	2.0043	-3.15269	0.00161773	0.0193172	0	0	0	40.4476	16.7208	0	0	6.43886	0	0	60.8298	0	19.802	0	0
CrematogasterSubCLCMeta_rep_c28226	B	PREDICTED: sodium/potassium/calcium exchanger 3 isoform X1	NA	47.5788	-6.31856	2.27664	-2.77539	0.0055136	0.0497637	0	0	0	0	132.845	0	334.377	60.5074	226.182	0	0	0	0	6.28234	0
CrematogasterSubCLCMeta_rep_c10922	B	NA	NA	8.46701	-6.31408	1.36113	-4.63887	3.50322e-06	0.00011294	16.2072	0	0	5.84382	11.9484	0	56.3262	0	22.5186	1.01159	14.3588	0	10.2174	0	0
CrematogasterSubCLCMeta_s54335	B	PREDICTED: 40S ribosomal protein S3	NA	2031.61	-6.30922	0.875527	-7.20619	5.75382e-13	8.50767e-11	5087.04	24.2976	216.029	1675.04	5364.2	8.59597	3426.7	2985.15	3601.82	4433.4	5413.1	4.74002	21.3909	10.0489	11.4669
CrematogasterSubCLCMeta_s54177	B	PREDICTED: protein TIS11	NA	1766.55	-6.30419	1.30136	-4.84431	1.27055e-06	4.68219e-05	2498.27	0.035436	0	1469.59	2404.07	10.7799	831.294	7063.92	4354.02	1626.49	6552.43	223.636	838.095	0	0
CrematogasterSubCLCMeta_rep_c34099	B	PREDICTED: protein Malvolio-like isoform X4	NA	112.836	-6.29873	0.959528	-6.56441	5.224e-11	5.63663e-09	290.411	0	0	126.195	132.305	0	401.51	155.098	151.18	161.735	251.15	15.2233	110.267	0	0
CrematogasterSubCLCMeta_rep_c32139	B	PREDICTED: probable E3 ubiquitin-protein ligase makorin-1 isoform X3	NA	114.581	-6.28924	1.07235	-5.86489	4.49422e-09	3.22795e-07	576.402	0	0	253.016	242.88	15.3125	185.876	183.442	75.0472	52.0133	69.6616	0	121.508	0	0
CrematogasterSubCLCMeta_s56961	B	NA	NA	11.667	-6.28547	1.38732	-4.53066	5.88004e-06	0.000176722	32	0	0	43.2477	27.1256	1.07718	30.3162	23.7664	13.2585	0	0	0	10.2037	0	0
CrematogasterSubCLCMeta_c30924	B	PREDICTED: uncharacterized protein LOC108003822 isoform X2	NA	8.26615	-6.28031	1.23597	-5.08127	3.74916e-07	1.6225e-05	10	0	0	10.1159	5.50833	0	39	7	18	0	27	0	18.6151	0	0
CrematogasterSubCLCMeta_rep_c38909	B	PREDICTED: girdin-like	Cyp9f2 [Drosophila melanogaster] Dembeck Cytochrom P450	2352.22	-6.27721	0.777193	-8.07677	6.65026e-16	1.58505e-13	2331.19	6.00645	18.645	1671.87	5785.84	192.171	5271.88	1103.05	1385.83	12683.2	2431.91	4.11651	3946.77	66.4944	25.2192
CrematogasterSubCLCMeta_s59967	B	PREDICTED: tubulin-specific chaperone D	NA	110.228	-6.26905	1.35705	-4.61962	3.84443e-06	0.000122062	163.275	0	0	125.038	116.058	0	62.6196	145.024	132.872	0	1042.16	0	92.8752	0	16.1684
CrematogasterSubCLCMeta_s54166	B	PREDICTED: sialin-like isoform X1	NA	1301.52	-6.26845	1.0838	-5.78378	7.30394e-09	4.97738e-07	3163.59	21.2081	115.064	1717.91	614.269	0	33.2284	3660.09	4279.21	3148.26	3524.33	26.3562	51.0737	16.1584	0
CrematogasterSubCLCMeta_rep_c40070	B	PREDICTED: fatty acyl-CoA reductase 1-like	NA	195.322	-6.26771	1.36685	-4.58551	4.52882e-06	0.000140429	17.917	0	1.04518	568.388	749.711	23.5409	421.697	0	2.06424	540.167	341.527	0	478.481	1.04226	0
CrematogasterSubCLCMeta_c28607	B	PREDICTED: inactive hydroxysteroid dehydrogenase-like protein 1	NA	22.8537	-6.26406	1.56074	-4.01352	5.98204e-05	0.00128917	128.809	0	0	3	0	3	0	22	14	86	76	0	28	0	0
CrematogasterSubCLCMeta_s60118	B	PREDICTED: uncharacterized protein LOC105201565	NA	8.1767	-6.26138	1.47866	-4.23451	2.29048e-05	0.000567668	19.9375	0	0	35.4427	25.7297	0	18.4492	8.94491	0	14.3549	0	0	3.55178	0	0
CrematogasterSubCLCMeta_s60717	B	PREDICTED: protein canopy 4	NA	15.9143	-6.25068	1.69303	-3.69201	0.000222488	0.00388013	0	0	1.65118	0	56.6031	0	5.02433	53.3372	0	10.143	51.1825	0	79.4891	0	0
CrematogasterSubCLCMeta_s59783	B	PREDICTED: senecionine N-oxygenase-like	NA	244.512	-6.24111	1.11797	-5.58254	2.37037e-08	1.38654e-06	464.483	8.69705	19.7291	134.04	354.47	4.39295	592.843	528.328	522.541	451.757	0	0	730.48	0	0
CrematogasterSubCLCMeta_rep_c36375	B	NA	NA	8.03377	-6.23911	1.05791	-5.89757	3.68888e-09	2.68985e-07	19.3592	0	0	5.00805	17.0327	0	17.7975	5.15585	28	13.2258	20.4281	0	5.05188	0	0
CrematogasterSubCLCMeta_s52821	B	PREDICTED: CD63 antigen	NA	120.974	-6.23091	0.994287	-6.26672	3.68739e-10	3.32678e-08	116.193	0	4.00137	123.688	67.0005	5.78906	409.957	348.804	0	128.255	114.026	0	573.891	2.53199	3.56738
CrematogasterSubCLCMeta_s43933	B	PREDICTED: 40S ribosomal protein S15Aa	NA	1500.47	-6.23035	1.28608	-4.84443	1.26975e-06	4.68219e-05	5442.79	4.0819	79.8112	2521.08	5997.54	16.1228	3769.11	20.3821	4.6247	0	6722.64	21.4913	5.07069	68.5674	20.7871
CrematogasterSubCLCMeta_s57933	B	PREDICTED: uncharacterized protein LOC105620756	NA	7.92792	-6.21865	1.73795	-3.57816	0.000346025	0.00557317	10	0	0	52.3729	5.78065	0	19.0078	0	8.46686	0	34.8149	0	0	0	0
CrematogasterSubCLCMeta_rep_c30034	B	PREDICTED: GTP-binding protein Rit2	NA	27.4869	-6.21134	1.18053	-5.26149	1.4289e-07	6.85229e-06	0	0	0	64	68.1708	0	99.0176	20.1293	52.753	29.6429	38.3567	0	67.649	0	4.19106
CrematogasterSubCLCMeta_s60147	B	uncharacterized protein LOC111042513	NA	234.143	-6.20656	0.934032	-6.64491	3.03398e-11	3.41997e-09	432.888	23.3738	0	236.977	302.294	0	387.01	261.015	375.454	472.287	919.456	5.83051	387.562	0	0
CrematogasterSubCLCMeta_rep_c2517	B	PREDICTED: maltase 1-like	NA	139.712	-6.20539	1.79014	-3.46642	0.000527442	0.0078497	0	0	8.0783	8.01116	123.994	0	5	6.19421	1362.67	709.919	0	2.28258	0	0	10.903
CrematogasterSubCLCMeta_s44176	B	PREDICTED: protein O-mannosyl-transferase 2	NA	47.2702	-6.20322	1.07152	-5.78918	7.07289e-09	4.84751e-07	252.796	0	0	98.5373	51.2248	0	4.45434	26.0201	61.2165	96.5529	77.6772	0	69.0875	0	7.22759
CrematogasterSubCLCMeta_s55813	B	NA	NA	7.80069	-6.19457	1.35892	-4.55845	5.15332e-06	0.000157449	2.10475	0	0	0	11.9615	0	9.72695	4.04348	28.1165	41.1193	5.0098	0	22.0975	0	0
CrematogasterSubCLCMeta_s52228	B	PREDICTED: uncharacterized protein LOC108759968	NA	10.8455	-6.18289	1.18756	-5.20638	1.9256e-07	8.92164e-06	15.4999	0	0	29.9351	17.6302	0	15	4.314	41.4053	0	33	1	22.0668	0	0
CrematogasterSubCLCMeta_s44516	B	NA	NA	15.1313	-6.17616	1.5735	-3.92511	8.66885e-05	0.00176423	38	0	0	104	0	0	22	17	26.6429	22	0	0	0	1	1
59-PAR-Cr-FB2_PF_(paired)_contig_46388	B	PREDICTED: receptor-type tyrosine-protein phosphatase T-like isoform X4	NA	7.69142	-6.17442	1.84712	-3.34273	0.000829581	0.011297	6	0	0	0	90	0	8	7	8	0	0	0	4	0	0
CrematogasterSubCLCMeta_s52278	B	PREDICTED: solute carrier family 2, facilitated glucose transporter member 8-like	NA	7.62323	-6.16191	1.46102	-4.21753	2.46989e-05	0.000605243	22	0	0	27.4627	0	0	10.9192	7.05525	30.849	0	20.3612	0	4.93306	0	0
CrematogasterSubCLCMeta_c28768	B	PREDICTED: sex determination protein fruitless-like	NA	7.54953	-6.14655	1.45334	-4.22927	2.34455e-05	0.00057927	33.0553	0	0	0	20.6096	0	18.6086	16.8338	8.27972	0	5.95615	0	14.0009	0	0
CrematogasterSubCLCMeta_s44764	B	PREDICTED: protein turtle isoform X2	NA	64.7265	-6.14613	0.944118	-6.50992	7.51918e-11	7.8823e-09	50.7566	0	0	105.752	119.616	0	184.817	58.0517	208.295	117.146	167.665	0	23.145	0	10.1744
CrematogasterSubCLCMeta_c33481	B	PREDICTED: cytochrome P450 6k1-like isoform X1	NA	599.451	-6.14079	0.682328	-8.99975	2.26226e-19	9.34295e-17	842.6	12.5917	4.32483	1321.2	1332.86	53.9052	1143.08	916.424	924.629	1285.88	324.052	6.40457	1207.16	0	8.5532
CrematogasterSubCLCMeta_c30685	B	NA	NA	7.49928	-6.13813	1.99107	-3.08283	0.00205041	0.0232001	0	0	0	35.1424	0	0	0	19.8421	12.6086	0	46.4013	0	8.50682	0	0
CrematogasterSubCLCMeta_s54112	B	PREDICTED: axonemal 84 kDa protein-like	NA	583.748	-6.13421	1.10246	-5.56411	2.63498e-08	1.52089e-06	1385.75	11.8572	60.1458	643.341	5.4934	0	1203.77	1207.73	529.925	2112.91	1446.49	0	487.509	14.6673	0
CrematogasterSubCLCMeta_s52831	B	NA	NA	164.673	-6.13274	1.84615	-3.32191	0.00089404	0.0119505	1519.25	0	0	0	74.5096	24.0162	637.908	1	0	152.57	51	0	87.3715	0	0
222-PAT-Cr-FB2_PF_(paired)_contig_26524	B	PREDICTED: uncharacterized protein LOC105462614	NA	7.46242	-6.13056	1.77589	-3.45211	0.000556219	0.00821164	2	0	0	46.7283	8.96764	0	11	0	0	17	0	0	31.5908	0	0
CrematogasterSubCLCMeta_rep_c38031	B	PREDICTED: venom acid phosphatase Acph-1-like	NA	7.30393	-6.09955	1.71797	-3.55044	0.000384582	0.00606258	5.1256	0	0	0	9	0	16	21.2902	29	0	0	0	36	0	0
CrematogasterSubCLCMeta_rep_c24991	B	PREDICTED: uncharacterized protein LOC105560198	NA	7.28186	-6.09811	1.51471	-4.02592	5.67536e-05	0.00123642	15.187	0	0	20	8.06304	0	3	0	13.1313	0	58.5837	0	7.13337	0	0
CrematogasterSubCLCMeta_rep_c17911	B	PREDICTED: hemK methyltransferase family member 2	NA	7.28995	-6.09743	2.02444	-3.01192	0.00259603	0.0277856	32.6929	0	0	24.6559	0	0	0	0	0	13.2741	45.8924	0	3.28216	0	0
CrematogasterSubCLCMeta_s57124	B	PREDICTED: uncharacterized protein LOC105560345	NA	466.368	-6.09542	0.923597	-6.59965	4.12136e-11	4.53889e-09	368.224	0	32.5361	1017.21	1427.1	5.28093	311.519	668.855	305.103	1120.69	1487.4	35.3585	706.2	0	0
CrematogasterSubCLCMeta_s52189	B	PREDICTED: nesprin-1 isoform X1	NA	58.472	-6.09037	2.00411	-3.03895	0.00237406	0.0259904	189.463	0	0	0	0	0	0	130.67	93.4415	274.152	220.073	8.94285	2.13705e-07	0	0
CrematogasterSubCLCMeta_s43176	B	PREDICTED: histone-lysine N-methyltransferase SETMAR-like, partial	NA	111.697	-6.08375	1.8214	-3.34015	0.000837345	0.011393	871.538	0	0	0	42	13.9923	0	0	1	417.338	419.002	0	1	1	2.03454
CrematogasterSubCLCMeta_s59600	B	PREDICTED: protein KIAA0556-like	NA	7.21699	-6.08267	1.46078	-4.16398	3.1275e-05	0.000740996	0	0	0	16.8105	5.679	0	0	10.8851	5.99765	23.3486	17.914	0	34.9981	0	0
CrematogasterSubCLCMeta_s52933	B	PREDICTED: LOW QUALITY PROTEIN: CAD protein	NA	7.20513	-6.08174	1.73206	-3.51129	0.000445944	0.00685838	1.99921	0	0	11.4928	0	0	27.3823	0	20.2174	0	30.0279	0	32.1779	0	0
CrematogasterSubCLCMeta_s45032	B	PREDICTED: leucine-rich PPR motif-containing protein, mitochondrial-like	NA	7.21084	-6.08094	1.72511	-3.52496	0.000423552	0.00658162	9.55957	0	0	8.61493	21.4459	0	6.51376	0	0	46.9596	19.8121	0	0	0	0
CrematogasterSubCLCMeta_s59678	B	PREDICTED: uncharacterized protein LOC105559244	NA	7.19462	-6.07594	1.74316	-3.4856	0.000491043	0.00742797	0	0	0	15.4995	0	0	16.2017	32.9149	3.07841	26.5283	0	0	12.8487	0	0
CrematogasterSubCLCMeta_s44569	B	uncharacterized protein K02A2.6-like	NA	7.14446	-6.06556	1.25306	-4.84058	1.29458e-06	4.74882e-05	10	0	0	18	12.1729	0	18	2.62061	2.73046	41	3	0	1.50361	0	0
CrematogasterSubCLCMeta_s56454	B	NA	NA	99.5926	-6.05305	1.80605	-3.35155	0.000803612	0.0109965	0	0	10	17	1561.07	4	8	1	3	2	0	0	3350.49	2	0
CrematogasterSubCLCMeta_c23551	B	retrovirus-related Pol polyprotein from transposon TNT 1-94	NA	1233.93	-6.0513	1.24719	-4.85193	1.22267e-06	4.53713e-05	22	17.0597	44.1857	83	3661	119	59	26.2827	10759.8	704.951	130	7	4827.61	0	4
CrematogasterSubCLCMeta_s30784	B	PREDICTED: protein phosphatase PP2A 55 kDa regulatory subunit isoform X1	NA	493.498	-6.0427	0.9565	-6.31751	2.65815e-10	2.4727e-08	411.139	0	5.58552	222.547	529.197	32.3802	892.905	517.707	820.059	846.407	3088.2	39.6947	856.277	0	0.464374
59-PAR-Cr-FB2_PF_(paired)_contig_25248	B	GPI transamidase component PIG-T	NA	7.00344	-6.03769	1.72693	-3.49621	0.000471919	0.00718634	49	0	0	7	11	0	1	2	0	35	0	0	1	0	0
CrematogasterSubCLCMeta_c52	B	PREDICTED: uncharacterized protein LOC105555908, partial	NA	308.882	-6.02326	0.916558	-6.5716	4.97763e-11	5.41962e-09	335	3	19	371	254	6	46	8	120	2558	58	9	975	7	6
CrematogasterSubCLCMeta_rep_c12105	B	NA	NA	6.88523	-6.01322	2.01349	-2.98646	0.00282228	0.0297485	0	0	0	31	0	0	0	21	7	35	0	0	9	0	0
CrematogasterSubCLCMeta_c27404	B	AGAP002025-PA	NA	6.85194	-6.00795	2.07926	-2.88946	0.00385904	0.0377674	51.5168	0	0	0	16.7602	0	0	1	0	0	29.5045	0	12	0	0
CrematogasterSubCLCMeta_rep_c19734	B	uncharacterized protein LOC111359630	NA	6.85314	-6.00784	1.51246	-3.97223	7.12016e-05	0.00149936	17	0	0	9	20	0	45	4	8	0	6.03634	0	0	0	0
CrematogasterSubCLCMeta_rep_c17757	B	PREDICTED: lysosomal alpha-mannosidase isoform X2	NA	6.85899	-6.00754	1.25995	-4.76809	1.85978e-06	6.5129e-05	20	0	0	16	10	0	0	8	14	19	2	0	18	0	0
CrematogasterSubCLCMeta_rep_c2905	B	PREDICTED: uncharacterized protein LOC105561055, partial	NA	461.714	-6.00028	1.14265	-5.25118	1.51128e-07	7.21124e-06	54.4038	0	17.0756	1436.2	44.2137	0	26.9866	1093.91	1495.69	1206.1	655.086	52.6806	1168.94	0	6.98769
CrematogasterSubCLCMeta_s57566	B	PREDICTED: uncharacterized protein LOC105564486 isoform X4	NA	6.75195	-5.98682	1.73385	-3.4529	0.000554602	0.00819535	23.6229	0	0	16.8575	19.2281	0	0	0	14.86	0	2.0318	0	32.28	0	0
CrematogasterSubCLCMeta_rep_c26682	B	PREDICTED: putative nuclease HARBI1 isoform X1	NA	6.74504	-5.98518	2.03345	-2.94337	0.00324659	0.0330966	0	0	0	0	36.2852	0	25.0843	6.10531	37.6693	0	0	0	4.05385	0	0
59-PAR-Cr-FB2_PF_(paired)_contig_23139	B	PREDICTED: gelsolin-like protein 2, partial	NA	9.47959	-5.98483	1.71106	-3.49774	0.000469212	0.00715422	60.2068	0	0	38.9881	2	1	29.3437	0	3.92409	0	13.8121	0	0	0	0
CrematogasterSubCLCMeta_c36507	B	protein unc-13 homolog B isoform X4	NA	6.73649	-5.98265	1.51132	-3.95856	7.54038e-05	0.00157333	13	0	0	30.6809	5.09863	0	33.8989	3.50901	11.4311	0	0	0	8.06629	0	0
CrematogasterSubCLCMeta_s57556	B	PREDICTED: uncharacterized protein LOC105556435, partial	NA	6.72688	-5.98111	2.01102	-2.97416	0.00293793	0.0306505	0	0	0	47	25	0	0	5.42525	16.5806	0	14	0	0	0	0
CrematogasterSubCLCMeta_rep_c36730	B	PREDICTED: acyl-CoA desaturase-like	desaturase 1, isoform E [Drosophila melanogaster]	2481.74	-5.97879	1.01393	-5.89668	3.70887e-09	2.70031e-07	550.804	64.5474	38.4955	1972.59	398.091	58.138	625.224	505.227	446.83	93394.3	40069	31.6322	376.318	129.046	76.5325
CrematogasterSubCLCMeta_c11559	B	PREDICTED: uncharacterized protein LOC108760942	NA	9.41574	-5.97544	1.32762	-4.50086	6.76785e-06	0.000199402	8	0	0	1	15	0	7	13	22	57	24	0	0	0	1
CrematogasterSubCLCMeta_s53943	B	PREDICTED: protein unc-80 homolog	NA	6.65423	-5.96701	1.73068	-3.44778	0.000565219	0.00831377	0	0	0	0	12.5429	0	18.5476	10.557	18.0383	0	49.1642	0	3.46558	0	0
CrematogasterSubCLCMeta_s57638	B	PREDICTED: putative nuclease HARBI1	NA	9.34308	-5.96559	1.5818	-3.7714	0.000162337	0.00299464	21.2692	0	1	18	41.0004	0	0	0	38.6571	0	13.7632	0	19.1271	0	0
CrematogasterSubCLCMeta_s57869	B	PREDICTED: serine/threonine-protein kinase KIN4 isoform X2	NA	12.993	-5.95134	1.36806	-4.3502	1.36012e-05	0.000364629	53.196	1.88451	0	25.7176	33.487	0	1.11103	22.8899	26.3348	0	1.5599	0	36.7766	0	0.426164
CrematogasterSubCLCMeta_s53311	B	PREDICTED: non-canonical poly(A) RNA polymerase PAPD5-like	NA	72.2254	-5.94249	1.12328	-5.29031	1.22111e-07	5.95114e-06	53.6644	0	0	3.14478	61.7943	12.0978	79.9522	122.675	128.907	123.435	381.273	0	229.615	0	0
CrematogasterSubCLCMeta_rep_c5341	B	PREDICTED: uncharacterized protein LOC107172553	NA	6.48743	-5.92893	1.71685	-3.45337	0.000553625	0.00818343	6.77836	0	0	9.42213	24.9844	0	20.836	6.5761	0	0	0	0	35.0456	0	0
CrematogasterSubCLCMeta_rep_c30957	B	PREDICTED: protein SMG8 isoform X1	NA	35.1131	-5.92888	1.18683	-4.99555	5.86673e-07	2.40631e-05	67.5818	0	0	92.3939	58.2781	0	0	17.0057	36.8377	112.448	89.57	5.96287	83.007	0	0
CrematogasterSubCLCMeta_s43801	B	PREDICTED: alanine aminotransferase 1 isoform X1	NA	153.232	-5.92508	1.69275	-3.50027	0.00046479	0.00709357	763.812	22.1626	0	158.726	0	0	0	261.427	472.741	13.8601	214.09	0	523.399	0	0
CrematogasterSubCLCMeta_s57751	B	PREDICTED: protein MMS22-like	NA	6.46899	-5.92397	2.08833	-2.8367	0.00455822	0.0429019	67.4129	0	0	15.4543	5.94616	0	0	2.52052	0	0	8.91052	0	0.00799553	0	0
CrematogasterSubCLCMeta_s60207	B	NA	NA	6.42834	-5.91444	1.71199	-3.45472	0.000550865	0.00815018	25.255	0	0	0	1.01989	0	6	0	1	47.4163	2.21813	0	17	0	0
CrematogasterSubCLCMeta_rep_c11899	B	NA	NA	12.6137	-5.91352	1.07127	-5.52012	3.38763e-08	1.89593e-06	17	0	0	44	37.622	0	13	13	29.4302	2	21.5248	0	23.2067	0	2
CrematogasterSubCLCMeta_s37739	B	PREDICTED: uncharacterized protein LOC105450347	NA	17.2259	-5.9125	1.24019	-4.76741	1.86605e-06	6.52532e-05	32.4054	0	0	56.7199	16.7682	0	0	42.3891	64.0841	9.89816	25.4596	0	21.1138	0	3.38899
CrematogasterSubCLCMeta_s55667	B	PREDICTED: uncharacterized protein LOC105205348, partial	NA	6.41231	-5.91121	1.78706	-3.30778	0.000940384	0.0124553	6.59477	0	0	0	42.4901	0	25.5089	18.4975	3	0	4.47395	0	0	0	0
CrematogasterSubCLCMeta_rep_c29815	B	PREDICTED: apolipoprotein D-like	NA	5376.28	-5.91037	0.439761	-13.44	3.52593e-41	8.04366e-38	9693.66	70.0235	172.518	5589.98	10981.6	96.8464	10920.9	6310.04	10255.4	4817.8	25737.6	272.942	3113.15	124.623	199.09
CrematogasterSubCLCMeta_rep_c11752	B	tyrosine-protein kinase pr2	NA	6.38632	-5.90394	1.8747	-3.14927	0.00163681	0.0194916	5	0	0	7	6	0	0	17	0	58	1	0	0	0	0
CrematogasterSubCLCMeta_c26529	B	NA	NA	6.3785	-5.90258	1.78165	-3.31298	0.000923091	0.0122772	45.2402	0	0	12	9.07268	0	11	16.6905	2.17691	0	0	0	0	0	0
CrematogasterSubCLCMeta_s44246	B	PREDICTED: protein ANTAGONIST OF LIKE HETEROCHROMATIN PROTEIN 1-like	NA	43.6211	-5.8985	1.18969	-4.95803	7.12131e-07	2.83828e-05	86.2789	4.96403	0	27.29	133.172	0	46.9621	128.061	165.227	0	6.1637	0	82.3017	0	2.42319
CrematogasterSubCLCMeta_s43968	B	PREDICTED: fatty acid synthase-like	FASN3 [Drosophila melanogaster] FA Synthase Wicker-Thomas 2015	6.29542	-5.88557	1.59008	-3.70144	0.000214378	0.00376198	0	0	0	19.9783	1.18092	0	22.9505	9.89224	34.1578	2.14976	11.0052	0	0	0	0
CrematogasterSubCLCMeta_c12246	B	PREDICTED: zinc finger protein 845	NA	6.26372	-5.87571	1.37267	-4.2805	1.86476e-05	0.000477471	4	0	0	4	11.1627	0	13	7	0	45	2.6277	0	9	0	0
CrematogasterSubCLCMeta_c19026	B	PREDICTED: bromodomain adjacent to zinc finger domain protein 1A-like	NA	6.22958	-5.86808	1.49794	-3.91743	8.94981e-05	0.00181217	0	0	0	31	6	0	4	14	10	22	0	0	8	0	0
CrematogasterSubCLCMeta_rep_c25366	B	uncharacterized protein LOC111034053, partial	NA	6.19702	-5.86457	1.25625	-4.66833	3.03655e-06	9.96383e-05	16	0	0	9.56641	29.0119	0	11.4149	2	9	0	14.9038	0	8.68857	0	0
59-PAR-Cr-FB2_PF_(paired)_contig_36232	B	PREDICTED: gephyrin-like	NA	6.20662	-5.86372	1.64154	-3.57209	0.00035414	0.00567798	4	0	0	14	2	0	4	0	0	57	12	0	3	0	0
CrematogasterSubCLCMeta_s60416	B	uncharacterized protein LOC110833857	NA	6.16059	-5.85389	1.63695	-3.57611	0.000348749	0.00560747	13	0	0	0	14	0	0	3	1	41	24	0	2	0	0
CrematogasterSubCLCMeta_s58446	B	PREDICTED: lysozyme	NA	6.14562	-5.85219	1.53148	-3.82126	0.000132772	0.00252408	0	0	0	0	9.37948	0	1.25132	7.99551	8.65118	19	30.6654	0	25.3891	0	0
CrematogasterSubCLCMeta_rep_c5353	B	PREDICTED: nuclear pore complex protein Nup88 isoform X1	NA	56.1792	-5.84232	1.00248	-5.82786	5.61427e-09	3.93796e-07	159.737	0	0	88.259	101.436	9.80737	56.7389	39.1824	12.4217	161.306	186.455	0	87.2433	0	0
CrematogasterSubCLCMeta_s55605	B	PREDICTED: serine/threonine-protein kinase fray2-like	NA	6.10804	-5.84086	1.70174	-3.43228	0.000598522	0.00872327	0	0.29784	0	26.8419	5.12164	0	11.9529	18.151	13.8337	0	0	0	19.0169	0	0
CrematogasterSubCLCMeta_rep_c17208	B	PREDICTED: NEDD8	NA	106.855	-5.83057	1.6094	-3.62283	0.000291403	0.00484308	8.29114	0	0	0	213.296	0	0	412.476	441.816	1.0638	214.563	15.0807	397.974	0	4.51554
CrematogasterSubCLCMeta_s52593	B	PREDICTED: uncharacterized protein LOC105451300	NA	383.056	-5.82508	1.29074	-4.51297	6.39263e-06	0.00018963	427.834	0	0	1133.37	1847.28	48.3059	1247.8	714.596	304.959	0	173.022	0	67.9656	16.5716	4.0077
CrematogasterSubCLCMeta_s52705	B	PREDICTED: uncharacterized protein LOC108914938	NA	11.8628	-5.82235	1.93226	-3.01322	0.00258487	0.0276971	0	0	0	59.3731	7.75896	0	87.5851	0	0	0	7	1.76047	25.5542	0	0
CrematogasterSubCLCMeta_rep_c30471	B	NA	NA	6.00979	-5.81726	1.86364	-3.12146	0.00179958	0.0209558	0.950357	0	0	0	15.6257	0	0	3.58978	12.3864	53.6496	0	0	5.24309	0	0
CrematogasterSubCLCMeta_s53270	B	PREDICTED: 3-hydroxyisobutyryl-CoA hydrolase, mitochondrial-like	NA	38.4811	-5.80781	1.9855	-2.92512	0.00344326	0.0346329	204.173	1.22832	0	251.565	1.06939	0	125.434	4	0	0	0	6.08385	0	0	0
CrematogasterSubCLCMeta_c38306	B	PREDICTED: uncharacterized protein K02A2.6-like	NA	204.796	-5.80529	0.614454	-9.44789	3.45738e-21	1.76205e-18	225.629	1.62432	22.7735	620.549	316.213	4.67335	448.367	121.509	440.794	300.76	249.065	3.10551	519.825	0	5.81739
CrematogasterSubCLCMeta_c7684	B	PREDICTED: protein YIPF1	NA	305.701	-5.80461	0.664346	-8.73733	2.38684e-18	8.47011e-16	596.974	0	7.74243	462.915	525.311	0	725	229.653	699.032	216.832	598.674	19.3146	840.667	22.8271	6.6763
CrematogasterSubCLCMeta_s31761	B	PREDICTED: actin-interacting protein 1 isoform X2	NA	484.615	-5.80327	1.29862	-4.4688	7.86596e-06	0.000226599	1169.67	0	0	726.219	954.699	0	103.794	518.408	687.579	1212.75	1111.63	90.9508	1165.02	0	0
CrematogasterSubCLCMeta_rep_c11704	B	C. briggsae CBR-MAC-1 protein	NA	5.9477	-5.80288	1.10104	-5.27034	1.36169e-07	6.5431e-06	3	0	0	10.4589	5	0	3.4993	17.039	16.268	11	21	0	9	0	0
CrematogasterSubCLCMeta_c91	B	PREDICTED: uncharacterized protein LOC105662864	NA	25.6427	-5.80285	1.33805	-4.33678	1.44583e-05	0.000383316	6	0	1	45	187	0	30	6	9	0	7	0	123	0	4
CrematogasterSubCLCMeta_rep_c1532	B	PREDICTED: tyrosine 3-monooxygenase	NA	1837.55	-5.80129	0.908604	-6.38484	1.71576e-10	1.6639e-08	933.713	68.1389	23.3528	190.388	259.197	102.492	227.587	2794.73	1498.07	808.246	22575.4	13.26	2821.76	30.272	99.3322
CrematogasterSubCLCMeta_s59868	B	PREDICTED: fatty acid synthase-like	NA	46.4522	-5.79693	1.58511	-3.65713	0.000255057	0.00435927	200.462	0	7	0	3	1	4	0	1	303.939	212.227	1	8	0	0
CrematogasterSubCLCMeta_c20421	B	hypothetical protein CRE_05366	NA	5.91504	-5.79377	1.82113	-3.18141	0.00146561	0.0178025	32	0	0	18	2	0	0	5	3	29	0	0	0	0	0
CrematogasterSubCLCMeta_c11557	B	PREDICTED: FIT family protein CG10671	NA	5.91066	-5.79377	2.00622	-2.8879	0.00387823	0.03784	0	0	0	0	28	0	5	11	0	26	0	0	22	0	0
CrematogasterSubCLCMeta_rep_c33877	B	NA	NA	5.86525	-5.78167	1.53241	-3.77291	0.000161352	0.00297991	6.21079	0	0	19.8404	12.9852	0	0	23.5935	13.8606	0	12.7346	0	1.42549	0	0
CrematogasterSubCLCMeta_rep_c4778	B	PREDICTED: uncharacterized protein LOC105555675	NA	847.142	-5.78	0.795548	-7.26543	3.71861e-13	5.72822e-11	734.664	17.9141	16	3753	1655.85	1.6162	1000	513.895	2155.17	1006.09	1319.31	1	1271.52	4	126
CrematogasterSubCLCMeta_c6648	B	retrovirus-related Pol polyprotein from transposon TNT 1-94	NA	160.16	-5.77595	0.63817	-9.0508	1.4193e-19	6.0172e-17	348	11	4	171	437	0	91	288	229	388	170	11	359	1	2
CrematogasterSubCLCMeta_c11863	B	Leucine--tRNA ligase	NA	5.81982	-5.77018	1.54192	-3.74219	0.00018242	0.0033078	29	0	0	10	0	0	3	4	5	27	0	0	11	0	0
CrematogasterSubCLCMeta_c15696	B	transcription intermediary factor 1-alpha-like isoform X1	NA	5.81531	-5.76955	1.90613	-3.02684	0.00247128	0.0268279	11	0	0	1	0	0	12	0	4	58	0	0	2	0	0
CrematogasterSubCLCMeta_s26049	B	NA	NA	5.82238	-5.76869	1.32793	-4.34413	1.39827e-05	0.000372979	20	0	0	9.25459	1.02437	0	1.14004	12.1238	3.02928	33.1831	6	0	3.05984	0	0
CrematogasterSubCLCMeta_rep_c28696	B	PREDICTED: suppressor of Mek1	NA	5.78511	-5.76393	1.7157	-3.35952	0.000780776	0.0107315	7.10142	0	0	34	8	0	0	7.0781	13.2663	0	24.9378	0	0	0	0
CrematogasterSubCLCMeta_s55582	B	PREDICTED: Fanconi anemia group M protein	NA	5.78537	-5.76193	1.69712	-3.39512	0.000685988	0.00967431	0	0	0	8.34421	8.61162	0	0	21.4693	0	23.9433	9.78811	0	17.1435	0	0
CrematogasterSubCLCMeta_rep_c38834	B	PREDICTED: LOW QUALITY PROTEIN: breast cancer type 2 susceptibility protein homolog	NA	287.343	-5.75833	1.3487	-4.26952	1.95891e-05	0.000497063	875.013	20.1445	0	1723.16	1.17728	0	537.949	439.209	557.141	211.896	0	9.86387	2.18638	17.1808	4.4416
CrematogasterSubCLCMeta_c21549	B	PREDICTED: uncharacterized protein LOC108774327	NA	8.09397	-5.75253	1.24264	-4.62927	3.66949e-06	0.000117667	22	0	0	3	7	0	23	22	12	25	0	1	8	0	0
CrematogasterSubCLCMeta_rep_c26948	B	PREDICTED: follistatin-related protein 5-like isoform X2	NA	11.2693	-5.74927	1.64716	-3.49041	0.000482285	0.00732062	0	0	0	0	44.436	0	43.0947	12.1297	8.04445	17.1038	61.3869	0	0	0	1.90918
CrematogasterSubCLCMeta_s43705	B	PREDICTED: malate dehydrogenase, mitochondrial	NA	1509.92	-5.7468	1.21309	-4.73734	2.16537e-06	7.4032e-05	2706.75	0	13.1849	175.481	2681.37	263.567	944.244	6058.75	1381.25	3152.79	1286.46	10.8165	4465.95	0	0
CrematogasterSubCLCMeta_s43537	B	PREDICTED: uncharacterized protein LOC105197181	NA	215.509	-5.74414	1.43075	-4.01478	5.95e-05	0.00128457	643.417	0	0	0	503.477	40.7887	422.726	260.636	165.644	486.809	704.757	0	226.512	0	0
CrematogasterSubCLCMeta_s44229	B	NA	NA	5.69554	-5.74052	1.77223	-3.23916	0.00119883	0.0151377	35.2039	0	0	21	2	0	9.73581	5.19514	0	0	16.7112	0	0	0	0
CrematogasterSubCLCMeta_rep_c15413	B	PREDICTED: uncharacterized protein LOC108764918	NA	5.68435	-5.7373	1.48921	-3.85257	0.000116885	0.00227072	16	0	0	23	19	0	11	3	12.6753	4	0	0	0	0	0
CrematogasterSubCLCMeta_rep_c11919	B	PREDICTED: uncharacterized protein LOC105555964	NA	99.0012	-5.73346	1.57588	-3.63826	0.000274486	0.0046237	0	0	0	175	362	18	352.793	0	1	124	283	1	315	0	0
CrematogasterSubCLCMeta_s60400	B	PREDICTED: LOW QUALITY PROTEIN: beta-galactosidase-like	NA	5.66341	-5.73133	1.86394	-3.07484	0.00210616	0.0236354	6.29247	0	0	0	5.78081	0	5.16508	0	3.90449	61.7823	2.88705	4.89296e-07	0.000630784	0	0
CrematogasterSubCLCMeta_s60102	B	PREDICTED: pseudouridylate synthase 7 homolog	NA	341.064	-5.73037	1.552	-3.69225	0.000222281	0.00387935	774.548	0	0	0	0	54.6202	698.255	821	4.73433	560	1632.83	8.00312	960.102	0	2.82778
CrematogasterSubCLCMeta_s55730	B	PREDICTED: cytochrome P450 6k1-like	NA	7.95419	-5.73014	1.22686	-4.67056	3.00382e-06	9.87675e-05	8.60499	0	1.15194	5	16.4009	0	29.8018	7.2888	25.8622	24	0	0	7.42537	0	0
59-PAR-Cr-FB2_PF_(paired)_contig_24017	B	PREDICTED: tubulin glycylase 3A-like	NA	5.61241	-5.72025	1.32022	-4.33281	1.47221e-05	0.000389302	20	0	0	12	16	0	17	3	1	0	10	0	11	0	0
CrematogasterSubCLCMeta_rep_c23438	B	PREDICTED: uncharacterized protein LOC108772331	NA	138.604	-5.71211	1.05711	-5.40354	6.53399e-08	3.39505e-06	256.519	0	21	295.379	237.733	0	334.518	433.461	164.53	267.83	1.007	1.04159	83.0149	0	6.777
CrematogasterSubCLCMeta_s52915	B	NA	NA	5.58673	-5.71127	1.56119	-3.65828	0.000253911	0.00434433	0	0	0	2.71698	9.22883	0	0	18.4028	17.5448	22.4073	1.41697	0	15.4321	0	0
CrematogasterSubCLCMeta_s52840	B	PREDICTED: protein ALP1-like	NA	191.381	-5.71023	0.915859	-6.23484	4.52254e-10	3.98275e-08	490.18	0	11	311.152	532.629	24	155.942	337.218	225.064	530.998	10.238	1	319.941	2	0
CrematogasterSubCLCMeta_rep_c4731	B	PREDICTED: glutamate receptor ionotropic, delta-2-like	NA	609.71	-5.70277	0.89236	-6.39066	1.65169e-10	1.60828e-08	880	27.7183	0	4101.98	622.467	13.1757	690	1306.09	323.224	860	17	22.0633	348	44.2218	8.07551
CrematogasterSubCLCMeta_s43783	B	PREDICTED: fatty acid synthase-like	NA	228.532	-5.69412	1.73367	-3.28443	0.0010219	0.0133141	549.502	0	0	0	1873.17	42.601	0	3.73993	1.00461	347.959	53.8774	1.14087	795.826	1.39083	0
CrematogasterSubCLCMeta_s59177	B	PREDICTED: uncharacterized protein LOC105564248, partial	NA	7.72769	-5.68972	1.88275	-3.02203	0.00251085	0.0271713	0	0	0	0	25.3681	0	28.2595	0	4.08813	0	67.5833	0	9.24211	1	0
CrematogasterSubCLCMeta_s57378	B	NA	NA	5.43597	-5.67518	1.66256	-3.41353	0.000641275	0.00919531	8.93632	0	0	15.2352	21.202	0	0	0	9.6936	0	14.6534	0	19.8254	0	0
CrematogasterSubCLCMeta_s60603	B	PREDICTED: uncharacterized protein LOC105457091	NA	7.65234	-5.67192	1.04515	-5.42687	5.73503e-08	3.04261e-06	13.2782	1	0	16.3803	14.557	0	19.2057	4.49318	10.4152	21.9368	19.0198	0	2.685	0	0
CrematogasterSubCLCMeta_s25640	B	PREDICTED: D-beta-hydroxybutyrate dehydrogenase, mitochondrial	NA	5.43155	-5.67137	1.98937	-2.85083	0.00436053	0.0413091	0	0	0	0	0	0	17.1207	30.2618	14.7234	0	8.91827	0	13.216	0	0
CrematogasterSubCLCMeta_c20823	B	PREDICTED: uncharacterized protein LOC105204142, partial	NA	5.42607	-5.66988	1.72279	-3.2911	0.000997974	0.0130771	0	0	0	11	0	0	7	6	10	33	0	0	17	0	0
CrematogasterSubCLCMeta_c14019	B	PREDICTED: uncharacterized protein LOC105195852	NA	5.31712	-5.64257	1.56127	-3.61409	0.000301403	0.00497736	12	0	0	15	5	0	7	2	4	0	0	0	41	0	0
CrematogasterSubCLCMeta_s53408	B	PREDICTED: uncharacterized protein LOC105448375	NA	14.9719	-5.63804	1.56913	-3.5931	0.000326764	0.00531735	38.761	0	0	68.9274	36.5477	1	5.92365	0	34.9255	0	56.0195	0	0.000105556	2.36091	0
CrematogasterSubCLCMeta_s54326	B	PREDICTED: hemolymph lipopolysaccharide-binding protein-like	NA	945.512	-5.63735	0.886481	-6.35924	2.02755e-10	1.94268e-08	3158.12	15.2126	18.5482	1032.69	2083.24	1.10432e-06	2471.67	1491.71	1190.17	1366.9	333.4	36.5973	1392.2	0	135.142
CrematogasterSubCLCMeta_rep_c26732	B	NA	NA	5.26093	-5.6257	1.80726	-3.11283	0.00185302	0.0213953	6.12611	0	0	8	24.759	0	0	0	1.36465	30.8422	0	0	11.0576	0	0
CrematogasterSubCLCMeta_c12099	B	PREDICTED: retrovirus-related Pol polyprotein from transposon TNT 1-94	NA	5.25816	-5.62445	1.26751	-4.43741	9.10472e-06	0.000258095	0	0	0	22	9	0	4	9	4	16	14	0	5	0	0
CrematogasterSubCLCMeta_s53086	B	PREDICTED: uncharacterized protein LOC105203974	NA	7.3694	-5.61895	1.86299	-3.0161	0.0025605	0.0275344	0	0	0	0	6	0	26	42	15	0	0	0	22	0	1
CrematogasterSubCLCMeta_s59523	B	PREDICTED: ATPase ASNA1 homolog	NA	127.081	-5.60894	1.93656	-2.89635	0.0037753	0.0371383	367.569	0	0	0	0	0	0	0	198.502	626.738	342.172	16.9312	487.758	0	11.4688
CrematogasterSubCLCMeta_rep_c25352	B	PREDICTED: peroxisomal membrane protein PMP34	NA	5.19224	-5.60755	1.76695	-3.17357	0.00150575	0.018207	29	0	0	17	20	0	0	0	2.25109	0	11	0	4.4937	0	0
CrematogasterSubCLCMeta_rep_c8265	B	NA	NA	7.28882	-5.60026	1.41608	-3.95478	7.66063e-05	0.0015908	0	1	0	7	5.98538	0	6	11.6235	26.2847	24	0	0	32.8348	0	0
CrematogasterSubCLCMeta_c11219	B	PREDICTED: RNA-binding protein 47-like	NA	5.16513	-5.59827	1.76528	-3.17132	0.00151747	0.0183184	0	0	0	11.5964	0	0	0	8.05621	4.93904	39	4	0	10.7866	0	0
CrematogasterSubCLCMeta_s44957	B	NA	NA	7.21364	-5.58817	1.18864	-4.70131	2.58495e-06	8.6539e-05	23.8474	0	0.748743	17.6843	13	0	8.85885	0.938356	6.56042	24.9105	14.909	0	1.45257	0	0
CrematogasterSubCLCMeta_rep_c26634	B	PREDICTED: islet cell autoantigen 1 isoform X2	NA	51.5163	-5.57758	1.49761	-3.72432	0.000195839	0.00350077	27.2296	0	0	250.299	0	0	3.02942	89.4584	1.39229	42.6869	156.01	0	251.096	0	11.6426
CrematogasterSubCLCMeta_c35255	B	NA	NA	5.02899	-5.56391	1.20547	-4.61555	3.92058e-06	0.000123894	7.87482	0	0	9.92313	5	0	7	6	21.7493	0	12	0	11.8004	0	0
CrematogasterSubCLCMeta_s52727	B	NA	NA	5.03927	-5.5624	1.69139	-3.28865	0.00100669	0.0131626	0	0	0	7	0	0	11	15.4583	10	21	0	0	12.936	0	0
CrematogasterSubCLCMeta_rep_c24598	B	PREDICTED: golgin subfamily A member 4-like	NA	180.366	-5.55944	1.69192	-3.28587	0.00101668	0.0132613	413.063	0	41.7439	0	487.433	0.00336076	623.635	0	82.862	626.669	512.459	0	119.554	0	0
CrematogasterSubCLCMeta_rep_c4628	B	PREDICTED: golgin subfamily A member 2-like	NA	1053.52	-5.54927	0.983257	-5.64377	1.66369e-08	1.0159e-06	247.705	0	16.6197	2000.16	186.623	130.938	2682.99	2377.72	2313.27	2425.66	1324.48	0	2785.78	7.40509	82.8879
CrematogasterSubCLCMeta_rep_c32630	B	ras-related protein Rab-11A	NA	517.173	-5.54702	1.60496	-3.45617	0.000547912	0.00811651	105.344	45.6954	22.455	863.981	0	29.0634	885.771	2472.06	0	1594.47	0	0	1701.01	0	9.9299
CrematogasterSubCLCMeta_c28822	B	PREDICTED: 116 kDa U5 small nuclear ribonucleoprotein component	NA	4.96336	-5.54243	1.80103	-3.07737	0.00208836	0.0234966	0	0	0	45	3	0	13.1624	0	5	0	4.12562	0	9.3192	0	0
CrematogasterSubCLCMeta_s41139	B	PREDICTED: alpha-tocopherol transfer protein-like	NA	18.2904	-5.54201	1.44917	-3.82426	0.000131167	0.00250152	42.8466	0	0	23.8136	33.7327	3.80107	6.98111e-07	28.841	11.8719	0	29.1456	0	121.155	0	0
CrematogasterSubCLCMeta_s43696	B	PREDICTED: uncharacterized protein LOC108769986	NA	4.9518	-5.53759	1.73458	-3.19247	0.00141059	0.01727	0	0	0	19	11.8943	0	1	0	1	38	1	0	4	0	0
CrematogasterSubCLCMeta_c39157	B	NA	NA	4.92279	-5.52945	1.81824	-3.0411	0.00235713	0.0258464	47	0	0	3	9	0	0	4	5	0	0	0	8	0	0
CrematogasterSubCLCMeta_s43657	B	PREDICTED: transmembrane protein 194A isoform X2	NA	13.5515	-5.5285	1.2187	-4.5364	5.72238e-06	0.000172416	52.4572	0	0	61.0499	10	2	13	12.0054	12.4067	0	13.3299	0	37.7871	0	1
CrematogasterSubCLCMeta_rep_c35746	B	uncharacterized protein LOC111124935 isoform X2	NA	4.8881	-5.52259	1.73813	-3.17732	0.00148641	0.0180277	1.51378	0	0	0	14.8627	0	0	8.7592	8.81833	0	33.8412	0	13.8228	0	0
CrematogasterSubCLCMeta_s45010	B	PREDICTED: molybdopterin synthase catalytic subunit isoform X1	NA	30.8619	-5.50825	0.807051	-6.82516	8.78264e-12	1.09286e-09	74.1974	0	0	29	53.0212	0	46.1097	28.8633	59.7617	71.4039	67.0486	6.60123	58.0725	0	0
CrematogasterSubCLCMeta_s58538	B	PREDICTED: uncharacterized protein LOC101239284, partial	NA	4.83584	-5.50752	1.40539	-3.91884	8.89745e-05	0.00180461	9	0	0	0	10.2664	0	6	0	7.91944	12	17	0	17.7688	0	0
CrematogasterSubCLCMeta_s53346	B	PREDICTED: uncharacterized protein LOC105205071	NA	84.1081	-5.50616	0.959887	-5.73626	9.6791e-09	6.37822e-07	151.383	0	6	124.027	119.299	0	139.06	98.1375	163.22	367.395	11.0538	0	109.378	13	0
59-PAR-Cr-FB2_PF_(paired)_contig_11573	B	PREDICTED: uncharacterized protein LOC105462614	NA	40.7188	-5.50064	1.64037	-3.3533	0.000798553	0.010946	42.9432	0	0	415.193	101.095	0	0	12.5621	13.8444	0	11.8305	0	28.2603	9	0
CrematogasterSubCLCMeta_c18918	B	PREDICTED: LOW QUALITY PROTEIN: uncharacterized protein LOC105663077	NA	4.80671	-5.49727	1.50449	-3.65391	0.000258275	0.00440327	2	0	0	16	20	0	0	4	19	0	6	0	11	0	0
CrematogasterSubCLCMeta_rep_c19549	B	NA	NA	4.78131	-5.48935	1.29292	-4.24569	2.17924e-05	0.000545185	6	0	0	11	26	0	8	7	3	0	13	0	3	0	0
CrematogasterSubCLCMeta_rep_c20285	B	PREDICTED: protein MON2 homolog isoform X2	NA	1441.88	-5.48659	0.605541	-9.06064	1.29688e-19	5.54729e-17	1703.23	67.9351	96.5464	1947.99	1679.46	22.7235	3144.55	3208	2229.19	3422.1	2544.41	57.6495	2444.32	0	85.9533
CrematogasterSubCLCMeta_rep_c28066	B	PREDICTED: NADPH--cytochrome P450 reductase isoform X1	NA	7854.45	-5.48602	1.25792	-4.36117	1.29368e-05	0.000348965	15783.3	7.88832	0	19574.6	14516.6	1748.05	11124.4	14451.9	7958.45	10616.4	22536.2	4.10218	6355.33	21.3085	0
CrematogasterSubCLCMeta_rep_c8308	B	PREDICTED: uncharacterized protein LOC105457730	NA	24.782	-5.48563	1.74179	-3.14942	0.00163596	0.0194864	46	0	6	0	182	0	103	12	36	0	0	0	11	0	0
CrematogasterSubCLCMeta_c13766	B	PREDICTED: uncharacterized protein LOC105284312	NA	105.705	-5.48549	1.89902	-2.8886	0.00386967	0.0378046	298	0	0	702	0	24	186	188	190	28	0	0	0	0	0
CrematogasterSubCLCMeta_s56649	B	PREDICTED: methyltransferase-like protein 25	NA	6.69572	-5.48179	1.21535	-4.51046	6.46861e-06	0.000191528	10	0	1	4	9	0	4	18	13	0	25	0	25	0	0
CrematogasterSubCLCMeta_c14025	B	PREDICTED: peroxisomal biogenesis factor 3 isoform X1	NA	4.75619	-5.48055	1.7952	-3.05289	0.00226649	0.0250417	0	0	0	0	24	0	9	1	6	25	0	0	10	0	0
CrematogasterSubCLCMeta_c19101	B	PREDICTED: uncharacterized protein LOC105286098, partial	NA	4.73706	-5.474	1.68437	-3.24988	0.00115454	0.0147298	0	0	0	18	0	0	0	10	12	17	7	0	10	0	0
CrematogasterSubCLCMeta_s59069	B	NA	NA	22.441	-5.47193	1.01609	-5.3853	7.23259e-08	3.70976e-06	45.5538	2.9696	0.577399	20	49.7618	0	54.2876	37.0248	68.5552	0	60.3769	0	20.9663	0	1.13898
CrematogasterSubCLCMeta_s60350	B	PREDICTED: uncharacterized protein LOC105621899	NA	4.73186	-5.47171	1.80558	-3.03044	0.00244199	0.0265802	18.8427	0	0	6.49267	1.0346	0	0	6.4432	0	26.0912	0	0	13.8227	0	0
CrematogasterSubCLCMeta_s56264	B	PREDICTED: uncharacterized protein LOC105570876	NA	4.72038	-5.46979	1.74788	-3.12939	0.0017517	0.0205487	27.9501	0	0	0	0	0	15.8896	2	7.99628	9	11.8252	0	0	0	0
76-PAR-Cr-FB2_PF_(paired)_contig_28659	B	PREDICTED: uncharacterized protein LOC108365609	NA	4.71828	-5.4685	1.96697	-2.78016	0.00543326	0.049223	41	0	0	0	7	0	22	1	0	1	0	0	1	0	0
CrematogasterSubCLCMeta_s58753	B	Uncharacterized protein CELE_C42C1.8	NA	4.70541	-5.46329	1.60556	-3.40274	0.000667141	0.00946143	0	0	0	10.311	10.5826	0	0	3.71073	1.80007	37.921	3	0	3.74922	0	0
CrematogasterSubCLCMeta_rep_c31723	B	uncharacterized protein LOC109864121	NA	9.25479	-5.46187	1.55642	-3.50925	0.000449373	0.00690004	11.0364	0	0	1	8.78883	0	42.0717	3.24475	0	34	49.9616	0	0	0	2.335
CrematogasterSubCLCMeta_rep_c10463	B	PREDICTED: pre-mRNA-processing factor 6	NA	141.58	-5.46105	1.46349	-3.73152	0.000190331	0.00342422	220.02	0	0	318.768	467	0	42.6108	0	176.518	302	761.902	0	24.2593	0	35.8533
CrematogasterSubCLCMeta_rep_c3518	B	PREDICTED: facilitated trehalose transporter Tret1	NA	12.9967	-5.44841	1.09881	-4.95847	7.10494e-07	2.83411e-05	2.61739	0	0	24	18.6225	0	16.2514	18.1781	26.9437	35.4312	6.83044	0	54.4047	3.03835	0
CrematogasterSubCLCMeta_c9844	B	NA	NA	9.18643	-5.44824	1.42661	-3.81903	0.00013398	0.00254403	10	0	0	0	42	0	5	19	14	21	0	2	31	0	0
CrematogasterSubCLCMeta_c31718	B	PREDICTED: protein kinase C-binding protein 1 isoform X1	NA	260.45	-5.44065	0.704253	-7.72541	1.11491e-14	2.16243e-12	415.35	7.17468	7.88947	133.071	411.21	0	354.839	305.945	414.322	444.89	907.501	0	802.881	24.2075	22.9606
CrematogasterSubCLCMeta_rep_c31980	B	NA	NA	4.60666	-5.43293	1.86393	-2.91477	0.00355952	0.0355485	27.2761	0	0	0	12.1869	0	0	16.8664	1.35034	0	1	0	11.6415	0	0
CrematogasterSubCLCMeta_rep_c23694	B	PREDICTED: uncharacterized protein LOC105561055, partial	NA	328.58	-5.43271	0.812141	-6.68937	2.24129e-11	2.59984e-09	34.4111	0	4.92444	911.676	129.786	40	72.0134	451.594	804.336	790.98	905.344	9.31938	1130.81	11	14.0123
CrematogasterSubCLCMeta_rep_c25135	B	NA	NA	77.5554	-5.42586	1.22439	-4.43147	9.3594e-06	0.000264375	160.122	0	2.72166	100.621	70.2229	0	33.9839	117.629	479.695	163.217	0	0	72.8576	0	16.9661
CrematogasterSubCLCMeta_s60593	B	PREDICTED: cytochrome P450 4C1-like isoform X2	NA	33.1875	-5.42099	0.784542	-6.90975	4.85504e-12	6.32039e-10	102.245	1	0	43.7303	80.9311	3.20765	16.3445	44.7998	118.413	40.4476	34.4215	0	37.1825	0	3.55655
CrematogasterSubCLCMeta_c10191	B	NA	NA	9.01253	-5.41888	1.04089	-5.20603	1.92927e-07	8.93001e-06	22	0	0	19	20	0	8	16	4	24	8	0	17	0	2
CrematogasterSubCLCMeta_c20140	B	arginine-glutamic acid dipeptide repeats protein-like isoform X2	NA	4.55402	-5.41874	1.47162	-3.68216	0.00023127	0.00401284	14	0	0	8	15	0	15	2	13.2189	0	6	0	0	0	0
CrematogasterSubCLCMeta_rep_c17353	B	NA	NA	4.55293	-5.41697	1.78193	-3.03995	0.00236621	0.0259219	21	0	0	0	0	0	2	0	9	28	6	0	5	0	0
CrematogasterSubCLCMeta_s59464	B	PREDICTED: MTSS1-like protein isoform X6	NA	12.2985	-5.41457	1.53985	-3.51629	0.000437618	0.00675417	12.5922	0	3.33206	0	0	0	8.60211	7.90475	4.38191	90.4815	36.1937	0	31.6727	0	0
CrematogasterSubCLCMeta_c11525	B	NA	NA	4.53021	-5.41139	1.40536	-3.85053	0.000117862	0.0022837	0	0	0	0	12	0	9	7	9	11	8	0	17	0	0
CrematogasterSubCLCMeta_rep_c1409	B	PREDICTED: facilitated trehalose transporter Tret1 isoform X1	NA	10635.8	-5.40671	0.457291	-11.8234	2.95641e-32	4.04665e-29	37761.4	564.767	148.272	11243.6	21548.1	334.051	12113.2	23530	14993.7	11282.1	24349.4	444.498	7866.31	685.77	309.522
CrematogasterSubCLCMeta_s36014	B	PREDICTED: uncharacterized protein LOC105674296, partial	NA	4.52233	-5.40416	1.48036	-3.65058	0.000261652	0.00445292	2	0	0	26.5989	1.41628	0	4.00904	12.4712	2.60113	17.4368	1.878	0	0	0	0
CrematogasterSubCLCMeta_s59958	B	PREDICTED: beta carbonic anhydrase 1 isoform X1	NA	162.459	-5.40388	1.45905	-3.70369	0.000212486	0.003737	62.9133	0	0	338	0	39.0172	68.1153	536.34	596.36	294.399	407.901	0	214.521	0	0
CrematogasterSubCLCMeta_s53489	B	NA	NA	4.48318	-5.39652	1.75293	-3.07857	0.00207996	0.0234458	0	0	0	0	16	0	24.7436	5.27836	16.7412	0	8.08678	0	2.05291	0	0
CrematogasterSubCLCMeta_rep_c24271	B	PREDICTED: ATPase family AAA domain-containing protein 5	NA	12.4103	-5.39439	1.2676	-4.25559	2.08498e-05	0.000523782	27.2448	0	0	0	16.3053	0	4.07091	25.6677	14.6226	51.7864	13.871	2.91881	36.3897	0	0
CrematogasterSubCLCMeta_s59779	B	PREDICTED: sorting nexin-8-like isoform X2	NA	90.7969	-5.39028	1.93072	-2.79185	0.00524084	0.047869	110.092	0	0	66.4141	0	21.6163	257.042	0	0	544.74	5.37107	0	419.155	0	0
222-PAT-Cr-FB2_PF_(paired)_contig_18121	B	NA	NA	4.44775	-5.38222	1.51609	-3.55007	0.000385135	0.0060693	4.75032	0	0	0	8.3341	0	0	6.66226	5.27601	31.4905	9	0	3.6128	0	0
CrematogasterSubCLCMeta_rep_c27399	B	PREDICTED: tubulin beta chain-like isoform X1	NA	27.9309	-5.38058	1.57551	-3.41514	0.000637495	0.0091466	0	0	2.53836	0	51.762	4.3073	109.539	74.3491	94.4159	0	4.85816	0	102.489	0	0
CrematogasterSubCLCMeta_s60773	B	NA	NA	4.4214	-5.37474	1.29518	-4.14979	3.3278e-05	0.000782262	0	0	0	4.31737	4.29981	0	7.46276	4.29592	6.31981	25.8123	9.30386	0	9.84199	0	0
CrematogasterSubCLCMeta_c33007	B	PREDICTED: dystrobrevin beta-like isoform X3	NA	158.649	-5.37076	1.1881	-4.52048	6.17009e-06	0.000184169	256.011	0	0	434.455	69.5294	0	225.206	256.038	343.581	52.5209	611.219	40.2874	291.039	0	0
CrematogasterSubCLCMeta_rep_c1681	B	PREDICTED: NADPH--cytochrome P450 reductase isoform X1	NA	5821.99	-5.3679	0.825543	-6.50226	7.91219e-11	8.2402e-09	3673.05	95.2311	89.7184	136.11	1332.35	804.322	13646.6	8128.09	13663.3	10644.2	39156.2	50.0162	5623.91	253.311	140.466
CrematogasterSubCLCMeta_c18033	B	PREDICTED: uncharacterized protein LOC105835681, partial	NA	6.19284	-5.36753	1.71543	-3.12896	0.00175425	0.020563	0	0	0	24	5	0	5	8	2	0	0	0	55	0	1
CrematogasterSubCLCMeta_rep_c35777	B	PREDICTED: solute carrier family 35 member B1	NA	148.676	-5.36255	0.730091	-7.34505	2.05687e-13	3.31779e-11	312.208	0	7.99728	349.684	273.51	0	265.597	322.251	194.365	128.873	289.302	12.8539	168.172	0	17.8153
CrematogasterSubCLCMeta_rep_c8425	B	PREDICTED: uncharacterized protein LOC105566332	NA	2967.02	-5.3563	0.497673	-10.7627	5.16448e-27	4.49845e-24	5815.6	117.603	197.008	4502.62	3423.07	94.469	7599.43	8427.45	7736.34	3675.56	699.27	76.048	3084.48	162.349	90.4031
CrematogasterSubCLCMeta_c15286	B	PREDICTED: heterogeneous nuclear ribonucleoprotein A2 homolog 1-like	NA	4.33541	-5.34937	1.72547	-3.10024	0.00193366	0.0221457	13	0	0	0	5	0	7	7	0	0	34.3897	0	7	0	0
CrematogasterSubCLCMeta_s29420	B	PREDICTED: peritrophin-48-like	NA	6.09051	-5.34037	1.57705	-3.3863	0.00070841	0.00991754	0	0	0	17	6.92407	1.24038	18.7255	18	20	0	0	0	13	0	0
CrematogasterSubCLCMeta_s58897	B	PREDICTED: uncharacterized protein LOC105257014	NA	11.8283	-5.34031	1.37442	-3.8855	0.000102118	0.00202574	21.8765	0	2	21.7795	0	0	19.1572	8.0738	0	66.5743	13	0	30.3148	1	0
CrematogasterSubCLCMeta_c36480	B	PREDICTED: nuclear pore complex protein Nup107-like, partial	NA	4.31553	-5.34022	1.7802	-2.99978	0.00270177	0.028695	0.840329	0	0	0	12.5642	0	8.50272	0	8.69093	25.5074	0	0	10.4689	0	0
222-PAT-Cr-FB2_PF_(paired)_contig_34074	B	uncharacterized protein LOC111320025	NA	4.29805	-5.33923	1.33337	-4.0043	6.22019e-05	0.0013327	5	0	0	8	13	0	12	3	2	0	26	0	3	0	0
CrematogasterSubCLCMeta_s43255	B	PREDICTED: heparanase-like isoform X1	NA	544.29	-5.33595	1.4245	-3.74585	0.000179783	0.00326988	1835.14	21.6009	0	1461.91	948.843	101.37	1086.03	0	895.916	5.98125	54.7103	0	2304.41	0	11.3475
CrematogasterSubCLCMeta_s59996	B	PREDICTED: uncharacterized protein LOC105679152	NA	178.061	-5.33494	1.53683	-3.47138	0.000517792	0.00773557	0	32.0787	0	347.59	0	0	102.759	319.641	294.054	775.847	666.323	0	290.606	0	7.88249
CrematogasterSubCLCMeta_c18838	B	PREDICTED: uncharacterized protein LOC106658078	NA	6.03198	-5.32853	1.40767	-3.78535	0.000153494	0.0028546	0	0	1	23	26	0	11	3	16	7	0	0	9	0	0
CrematogasterSubCLCMeta_rep_c25497	B	PREDICTED: ceramide glucosyltransferase	NA	140.179	-5.32627	0.93523	-5.69514	1.23268e-08	7.84721e-07	312.431	0	0	322.904	282.533	7.10867	144.005	190.2	283.769	195.298	172.845	0	278.419	28.2895	0
CrematogasterSubCLCMeta_rep_c23584	B	PREDICTED: uncharacterized mitochondrial protein AtMg00810-like	NA	41.4985	-5.32452	0.842277	-6.32158	2.589e-10	2.41776e-08	85.1918	0	10	35	94.1192	1	75	52.5534	49.4221	146	67	0	37.3554	0	0
76-PAR-Cr-FB2_PF_(paired)_contig_41406	B	PREDICTED: uncharacterized protein LOC105560690, partial	NA	4.25552	-5.31751	1.74149	-3.05342	0.00226251	0.0250151	16	0	0	0	7	0	7	21	3	0	0	0	10	0	0
CrematogasterSubCLCMeta_rep_c29369	B	PREDICTED: transposable element P transposase isoform X1	NA	19.3565	-5.31629	0.941403	-5.6472	1.63078e-08	9.99051e-07	68.5102	0	0	32.1008	13.9947	0	24.6959	20.079	16.1089	60.0028	28.3705	5.01542	33.7867	0	0
76-PAR-Cr-FB2_PF_(paired)_contig_38860	B	NA	NA	4.21759	-5.30646	1.76067	-3.01389	0.00257921	0.0276673	12	0	0	0	2	0	8	14	25	0	5	0	0	0	0
CrematogasterSubCLCMeta_rep_c9585	B	PREDICTED: solute carrier family 25 member 44	NA	197.169	-5.30438	1.11134	-4.77297	1.81531e-06	6.38516e-05	417.975	5.10358	14.3462	349.029	132.276	0	0	37.5337	207.033	125.758	1659.43	0	408.286	25.3854	6.69341
CrematogasterSubCLCMeta_s52292	B	PREDICTED: histone-lysine N-methyltransferase SETMAR-like	NA	90.3906	-5.30126	1.67165	-3.17128	0.00151768	0.0183184	0	1	15.2854	854.897	3	0	1	149.966	353.968	0	9.2302	0	5	0	9.37808
CrematogasterSubCLCMeta_s57602	B	PREDICTED: syntaxin isoform X3	NA	8.29453	-5.30012	1.27101	-4.17002	3.04575e-05	0.000724852	31.342	0	0	14.0964	9.0046	0	3.47541	3	20.4603	0	22.8925	0	30.7752	2.29782	0
CrematogasterSubCLCMeta_s43572	B	PREDICTED: uncharacterized protein LOC105830040 isoform X2	NA	233.937	-5.29162	1.07926	-4.90303	9.43716e-07	3.61974e-05	440.001	35.7857	0	242.857	322.345	0	416.692	778.369	373.922	365.896	57.708	18.5263	530.139	0	0
CrematogasterSubCLCMeta_c36257	B	PREDICTED: relaxin receptor 1	NA	71.4136	-5.29153	1.60681	-3.2932	0.000990551	0.0130119	0	0	0	0	119.226	0	152.089	150.821	224.814	69.038	13	18.5526	395.865	0	0
CrematogasterSubCLCMeta_rep_c11901	B	PREDICTED: uncharacterized protein LOC108769970, partial	NA	19.1711	-5.28335	1.78027	-2.96773	0.00300008	0.0311497	0	0	0	37.5831	17	5.11036	1	27.4336	0	0	145	0	95	0	0
59-PAR-Cr-FB2_PF_(paired)_contig_36272	B	uncharacterized protein LOC111362701	NA	4.15154	-5.28326	1.74342	-3.03039	0.00244236	0.0265802	6	0	0	10	8	0	0	0	6	28.5821	0	0	5	0	0
CrematogasterSubCLCMeta_rep_c38199	B	PREDICTED: uncharacterized protein LOC108722135	NA	1120.94	-5.27898	0.345281	-15.2889	9.06565e-53	3.94825e-49	2128.25	57.496	57.4038	1936.01	2032.34	12.864	2034.1	1964.78	2256.59	2163.43	1108.62	61.948	1649.36	52.2229	51.6402
CrematogasterSubCLCMeta_c21562	B	PREDICTED: uncharacterized protein LOC101852842, partial	NA	4.13359	-5.2789	1.76236	-2.99537	0.00274116	0.0290148	0	0	0	12	0	0	16	11	1	0	19	0	8	0	0
59-PAR-Cr-FB2_PF_(paired)_contig_28144	B	PREDICTED: uncharacterized protein LOC107042104	NA	4.1327	-5.27737	1.60238	-3.29346	0.00098962	0.0130032	9	0	0	0	14	0	27	8	1	0	4	0	2	0	0
CrematogasterSubCLCMeta_c14510	B	PREDICTED: uncharacterized protein LOC108628188	NA	4.07266	-5.25859	1.68811	-3.11507	0.00183902	0.0212601	0	0	0	17	0	0	8	4	11	0	13	0	14	0	0
CrematogasterSubCLCMeta_c32378	B	PREDICTED: piggyBac transposable element-derived protein 4-like	NA	4.06347	-5.25681	1.37318	-3.8282	0.000129086	0.00246772	14	0	0	7	1.67781	0	16	1	3	0	18	0	6	0	0
222-PAT-Cr-FB2_PF_(paired)_contig_36522	B	NA	NA	4.05723	-5.25502	1.76108	-2.98397	0.00284531	0.029932	8	0	0	0	0	0	3	3	7	0	31	0	18	0	0
CrematogasterSubCLCMeta_s54129	B	PREDICTED: hemolymph lipopolysaccharide-binding protein-like	NA	39.0167	-5.25455	0.982152	-5.35003	8.79383e-08	4.42993e-06	85.5574	0	0	8.39653	93.94	2	190.792	39.4771	60.1843	79.8848	33.0656	0	12.724	0	8.99326
CrematogasterSubCLCMeta_s43022	B	PREDICTED: uncharacterized protein LOC103506659	NA	8.04148	-5.25378	1.50951	-3.48046	0.000500561	0.00753625	59.812	0	2	12	2.07457	0	0	18.2946	13.2052	0	10.215	0	7.4035	0	0
CrematogasterSubCLCMeta_s60220	B	NA	NA	4.05166	-5.25192	1.74459	-3.0104	0.002609	0.027887	11.8423	0	0	11	0	0	0	0	15.8867	2.39951	22.9827	0	3.64808	0	0
CrematogasterSubCLCMeta_rep_c37832	B	PREDICTED: uncharacterized protein LOC106637964	NA	168.249	-5.25028	0.344911	-15.2221	2.5212e-52	9.29103e-49	310.726	9	12	249.505	288.543	7	231.26	267.077	262.526	432.333	274.116	4	288.587	6	7
76-PAR-Cr-FB2_PF_(paired)_contig_12520	B	PREDICTED: uncharacterized protein LOC105560198	NA	4.03914	-5.24099	1.63096	-3.21345	0.00131153	0.0162809	10	0	0	0	2	0	2	11	2	29	0	0	3.65316	0	0
CrematogasterSubCLCMeta_s54812	B	PREDICTED: uncharacterized protein LOC109611168	NA	5.67329	-5.23725	1.65954	-3.15585	0.00160028	0.01916	0	0	0	0	11	0	0	4	3	38.6762	11	0	20.8249	1	0
CrematogasterSubCLCMeta_c15492	B	PREDICTED: uncharacterized protein LOC105190067	NA	3.98868	-5.23062	1.4848	-3.52279	0.000427036	0.00662715	3	0	0	4	0	0	11	5	6	0	21	0	17	0	0
CrematogasterSubCLCMeta_s41769	B	PREDICTED: fatty acid synthase-like, partial	NA	44.3842	-5.22982	1.59341	-3.28217	0.00103013	0.013384	138.527	0	0	23.2187	1.05795	0	0	14.0902	10.4003	411.142	65.7591	4.88329	0	6.73864	0
CrematogasterSubCLCMeta_s58915	B	PREDICTED: uncharacterized protein LOC107073060	NA	3.99463	-5.22929	1.76458	-2.96348	0.00304179	0.0314533	0	0	0	0	30.055	0	0	7.56853	2.99839	4.98085	5	0	13.2872	0	0
CrematogasterSubCLCMeta_rep_c22948	B	PREDICTED: inositol-pentakisphosphate 2-kinase isoform X1	NA	92.9431	-5.22338	1.24109	-4.2087	2.56844e-05	0.000625235	0	0	0	150.016	26.7269	0	108.941	173.916	136.551	101.334	717.621	9.90126	122.173	1.04031e-05	17.2805
CrematogasterSubCLCMeta_c10720	B	NA	NA	13.8381	-5.2199	1.32552	-3.93802	8.21583e-05	0.00168627	2	0	0	69	33	0	37	22	35	0	6	0	10	0	4
CrematogasterSubCLCMeta_rep_c31863	B	PREDICTED: ATPase WRNIP1	NA	11.1316	-5.21513	1.50233	-3.47136	0.000517836	0.00773557	29.2308	0	0	32.7381	51.5283	2.81396	3.89482	0	21.1295	2.75938	37.1092	0	0	0	0
CrematogasterSubCLCMeta_c15524	B	NA	NA	7.84318	-5.21482	1.66328	-3.13526	0.00171705	0.0202507	0	0	0	0	7	1	2	11	13	78	0	0	5	1	0
CrematogasterSubCLCMeta_s53021	B	PREDICTED: terminal uridylyltransferase 4-like, partial	NA	3.93889	-5.20841	1.7317	-3.00769	0.00263245	0.0280812	5.91494	0	0	0	17.3272	0	14.1316	0	5.67371	15.9627	0	0	2.99931	0	0
CrematogasterSubCLCMeta_c34849	B	PREDICTED: uncharacterized protein LOC105560345	NA	3.92664	-5.20652	1.82301	-2.856	0.0042902	0.0407799	2	0	0	0	14	0	0	6	0.538252	0	18.199	0	24.5652	0	0
222-PAT-Cr-FB2_PF_(paired)_contig_24570	B	cystine-binding periplasmic protein, putative, partial	NA	3.93359	-5.2058	1.87379	-2.77822	0.00546571	0.0493862	2	0	0	26	0	0	0	0	1	23	5	0	4	0	0
CrematogasterSubCLCMeta_s59672	B	PREDICTED: uncharacterized protein LOC106692977 isoform X2	NA	65.023	-5.19209	1.31248	-3.95594	7.62337e-05	0.00158587	46.9305	0	14.0166	191.86	0	0	62.0716	102.891	150.067	275.693	172.652	0	0	4.35872	1.15404
CrematogasterSubCLCMeta_rep_c25719	B	PREDICTED: uncharacterized protein LOC101846064	NA	110.856	-5.18862	0.683043	-7.59633	3.04657e-14	5.32671e-12	185.982	0	8.45628	144.889	221.936	14.6033	272.785	167.193	159.652	174.527	299.365	0	114.693	0	9.1688
CrematogasterSubCLCMeta_s60763	B	NA	NA	95.4321	-5.18654	1.50491	-3.44641	0.000568079	0.00835071	0	8.67892	0	7	3	0	14.6308	6.12552	3.71115	4493	1701.52	6	18	2	9.41281
CrematogasterSubCLCMeta_s59178	B	PREDICTED: E3 ubiquitin-protein ligase MYCBP2	NA	3.87233	-5.18512	1.69279	-3.06305	0.00219092	0.0243761	0	0	0	0	6.64322	0	13.7335	9.87241	14.8321	0	13.0149	0	4.10132	0	0
CrematogasterSubCLCMeta_s59867	B	PREDICTED: uncharacterized protein LOC105566980	NA	199.158	-5.18337	0.603522	-8.58853	8.80889e-18	2.75822e-15	400.01	0	23.6898	385.746	339.431	11	316.601	363.714	345.017	246.329	443.689	16.5163	264.482	0	5.96724
222-PAT-Cr-FB2_PF_(paired)_contig_11244	B	PREDICTED: reticulocyte-binding protein PFD0110w-like, partial	NA	3.87106	-5.18099	1.62203	-3.19415	0.00140245	0.0171878	11	0	0	0	4	0	0	5	1	30	5	0	2.50006	0	0
CrematogasterSubCLCMeta_s60439	B	PREDICTED: probable maleylacetoacetate isomerase 2	NA	3.86519	-5.18053	1.6889	-3.0674	0.00215931	0.0241077	9.37326	0	0	0	0	0	0	14.9406	8.19709	7.16685	15.3367	0	7.03783	0	0
CrematogasterSubCLCMeta_c24068	B	PREDICTED: uncharacterized protein LOC100571960	NA	176.785	-5.17871	0.847954	-6.1073	1.01332e-09	8.35547e-08	432.699	17	29	402.704	379.657	0	226.341	153.13	320.217	287.364	223.108	0	331.48	0	3.49445
CrematogasterSubCLCMeta_s43185	B	PREDICTED: ubiquinone biosynthesis monooxygenase COQ6 isoform X2	NA	39.2406	-5.17643	1.41523	-3.65767	0.000254521	0.00435165	133.687	0	0	94.1824	55.2063	10.5414	3.03754	0	66.3667	214.844	21.2993	0	7.09927	0	0
CrematogasterSubCLCMeta_rep_c30063	B	PREDICTED: elongation of very long chain fatty acids protein 6	CG9458 [Drosophila melanogaster] Dembeck FA Elongase	3481.41	-5.17078	0.552779	-9.35414	8.42825e-21	4.1626e-18	1494.37	156.755	349.382	4828.35	3679.71	102.043	2666.36	6703.8	15461.8	5426.09	1970.91	162.886	12183	66.1954	159.176
CrematogasterSubCLCMeta_rep_c23111	B	PREDICTED: uncharacterized protein LOC105198100, partial	NA	10.638	-5.1675	1.53661	-3.36292	0.000771221	0.0106322	23.3764	0	1.39232	0	34.6864	1.75335	7.04482	0	0	21	44.5799	0	43.1972	0	0
CrematogasterSubCLCMeta_rep_c8711	B	PREDICTED: protein unzipped	NA	572.097	-5.16637	1.06791	-4.83783	1.31267e-06	4.80047e-05	123.701	11.0928	15.7717	724.385	1595.61	53.6756	2024.93	245.191	2133.07	185.149	2321.21	16.9792	0	62.2469	0
76-PAR-Cr-FB2_PF_(paired)_contig_7371	B	PREDICTED: coiled-coil domain-containing protein 115	NA	17.59	-5.16536	1.03929	-4.97006	6.69311e-07	2.69225e-05	26.4412	0	0	33.501	16.0711	0	45.7269	28.0068	0	38.5017	49.7856	3.32593	36.2817	2.02011	0
CrematogasterSubCLCMeta_rep_c30121	B	NA	NA	10.3081	-5.16355	1.40668	-3.67073	0.000241855	0.00416482	0	0	1.19099	3.58295	33.7559	0	48.9192	4.35662	27.9353	22.924	0	0	19.5399	0	2.15125
CrematogasterSubCLCMeta_rep_c24152	B	PREDICTED: uncharacterized protein LOC105198746, partial	NA	74.2282	-5.15935	1.10453	-4.6711	2.99593e-06	9.85754e-05	9.36743	2.60177	5.21477	8	27.28	0	211.608	641.636	34.2204	11.6672	21.0437	0	88.0776	9.56409	2.59987
59-PAR-Cr-FB2_PF_(paired)_contig_9028	B	PREDICTED: uncharacterized protein LOC105667732	NA	42.1919	-5.15519	1.54117	-3.345	0.000822839	0.0112211	181.524	0	0	202.373	91.289	12	89.2588	0	19.663	0	29.766	0	39.2024	0	0
76-PAR-Cr-FB2_PF_(paired)_contig_29311	B	PREDICTED: cap-specific mRNA (nucleoside-2'-O-)-methyltransferase 2	NA	3.7971	-5.15459	1.70691	-3.01983	0.00252917	0.0273201	0	0	0	19	7	0	11	9	8	0	0	0	5	0	0
CrematogasterSubCLCMeta_s58879	B	NA	NA	10.3115	-5.15282	1.41016	-3.65407	0.000258118	0.00440215	29.2622	0	3	0	18.7729	0	16.0359	25.2911	13.6216	33	0	0	18.5684	0	0
CrematogasterSubCLCMeta_c18675	B	PREDICTED: uncharacterized protein LOC108771307	NA	32.7301	-5.1486	1.11114	-4.63361	3.5935e-06	0.000115695	46	2	0	82	18	0	59	61	107	89	0	0	2319	7	0
CrematogasterSubCLCMeta_s43181	B	PREDICTED: uncharacterized protein LOC108747896	NA	45.5652	-5.14268	1.43208	-3.59105	0.000329353	0.00534625	75.7898	0	13.9955	80.2692	101.782	0	4.66364	129.63	44.9224	228.178	2.64045	0	0	0	0
CrematogasterSubCLCMeta_rep_c39304	B	PREDICTED: uncharacterized protein LOC105451287	NA	197.492	-5.14185	1.08851	-4.72377	2.31512e-06	7.8604e-05	2.30634	0	23.6788	16	397.522	13.6666	117.05	472.463	686.172	1125.62	34.5965	0	115.277	11.9098	9.2875
CrematogasterSubCLCMeta_rep_c8667	B	PREDICTED: uncharacterized protein LOC105391048	NA	789.344	-5.13781	0.782394	-6.56678	5.14152e-11	5.57274e-09	219	23	27.53	453.814	1395.71	0	2934.4	1221.18	1733.01	1098.95	3377.49	107.311	231.831	51.4994	20.3819
CrematogasterSubCLCMeta_c14492	B	NA	NA	17.3512	-5.13774	1.36459	-3.76505	0.000166517	0.00305997	19	0	0	0	5.25547	5.20658	51.0462	1.03373	21.1251	31	36.6245	0	117.209	0	0
CrematogasterSubCLCMeta_c28284	B	NA	NA	14.1715	-5.13407	0.999509	-5.13659	2.79767e-07	1.2573e-05	26	2.14736	0	53	15	0.036066	9	6.57265	30	42	34.072	2.07805	5.47535	0	0
CrematogasterSubCLCMeta_c31881	B	PREDICTED: centrosomal protein of 162 kDa isoform X2	NA	5.24587	-5.12494	1.29609	-3.95417	7.6801e-05	0.00159294	4	1	0	8.91494	17.3522	0	2.72835	1.62759	22.5181	0	24.9233	0	4.15069	0	0
CrematogasterSubCLCMeta_s54314	B	PREDICTED: tumor protein p53-inducible nuclear protein 2	NA	227.899	-5.11954	1.01156	-5.06102	4.17016e-07	1.78375e-05	293.674	43.4054	10.2019	310.895	375.676	0	72.2678	360.27	340.923	1109.85	70.6384	7.40343	516.229	0	0
CrematogasterSubCLCMeta_s56928	B	PREDICTED: zinc finger MYND domain-containing protein 11	NA	423.322	-5.11717	0.717332	-7.13362	9.77622e-13	1.3939e-10	534.29	24.1012	36.7557	502.264	959.959	0.229725	590.729	641.571	824.684	774.569	1386.05	17.752	483.995	0	47.5856
CrematogasterSubCLCMeta_rep_c11996	B	PREDICTED: tRNA-splicing ligase RtcB homolog	NA	29.624	-5.11543	1.77851	-2.87625	0.00402435	0.0389091	30	0	0	83	0	4.67758	0	0	142	132	81	0	0	0	4
CrematogasterSubCLCMeta_c5508	B	PREDICTED: uncharacterized protein LOC106639100	NA	31.562	-5.11342	1.68841	-3.02854	0.00245739	0.0267074	35	8	0	0	249	0	121	6	0	1	90	0	7	0	0
CrematogasterSubCLCMeta_s43709	B	PREDICTED: E3 ubiquitin-protein ligase HECTD1 isoform X1	NA	122.345	-5.09884	0.960093	-5.31077	1.09161e-07	5.40245e-06	97.8108	5.68755	0	149.206	191.872	0	130.638	162.217	337.617	333.453	299.469	0	225.068	0	32.0799
76-PAR-Cr-FB2_PF_(paired)_contig_29144	B	NA	NA	3.64978	-5.0988	1.38773	-3.6742	0.000238596	0.00411759	15.7529	0	0	5.21385	5.70499	0	8	3	1.51978	0	1	0	16.8322	0	0
76-PAR-Cr-FB2_PF_(paired)_contig_13827	B	PREDICTED: zinc finger MYM-type protein 1-like	NA	3.63212	-5.09096	1.70474	-2.98636	0.00282322	0.0297519	0	0	0	5	18	0	9	10	6	0	0	0	9	0	0
CrematogasterSubCLCMeta_rep_c11770	B	NA	NA	25.6926	-5.08319	0.804402	-6.31922	2.62893e-10	2.45027e-08	39.5738	0	0	36.5214	34.5128	0	52.31	12.9301	20.3924	81.2879	68.6167	2.284	58.6434	0	6.18461
CrematogasterSubCLCMeta_rep_c31923	B	PREDICTED: LOW QUALITY PROTEIN: abnormal spindle-like microcephaly-associated protein homolog	NA	189.439	-5.06853	1.15372	-4.39321	1.11691e-05	0.000305934	571.013	0	0	410.01	99.3582	0	539.41	339.454	373.484	6.47681	124.943	27.099	458.697	0	33.7247
59-PAR-Cr-FB2_PF_(paired)_contig_35789	B	PREDICTED: ATP-binding cassette sub-family A member 1-like isoform X4	NA	5.05258	-5.06801	1.70898	-2.96552	0.00302168	0.0313062	5	0	0	10	5	0	0	4	0	47	0	0	4	0	1
CrematogasterSubCLCMeta_rep_c6250	B	PREDICTED: uncharacterized protein LOC108780192	NA	108.321	-5.0675	0.501077	-10.1132	4.82671e-24	3.16758e-21	152	6	1	174	322.983	7	238.637	69.5566	189	107	224	6	244	1	12
CrematogasterSubCLCMeta_s59292	B	RNA-binding protein 40-like	NA	7.05826	-5.06506	1.429	-3.54449	0.000393376	0.00618289	14.266	0	2.09784	7.70772	3.54794	0	0	17.1556	26.5425	0	36.8432	0	6.68166	0	0
59-PAR-Cr-FB2_PF_(paired)_contig_24339	B	PREDICTED: uncharacterized protein LOC105451300	NA	5.02917	-5.06313	1.64401	-3.07974	0.00207184	0.0233763	2	0	0	41	21.4441	0	10.0871	1	1.0381	0	0	0	2.28119	0	0.656902
CrematogasterSubCLCMeta_c10087	B	PREDICTED: uncharacterized protein LOC105153752	NA	52.1344	-5.05718	0.880903	-5.7409	9.41724e-09	6.23999e-07	83.9969	0	0	80.4741	110.181	14.4418	115.241	158.5	102.847	34.3733	61.9256	0	48.0678	0	2.37055
222-PAT-Cr-FB2_PF_(paired)_contig_17309	B	uncharacterized protein LOC101738465	NA	3.54715	-5.05717	1.8056	-2.80082	0.00509725	0.0468702	0	0	0	0	12	0	0	2.25766	2.25425	26	7	0	7	0	0
CrematogasterSubCLCMeta_rep_c7266	B	PREDICTED: uncharacterized protein LOC105449452	NA	90.23	-5.055	1.14412	-4.41824	9.95069e-06	0.000278126	105	0	0	61	64	0	56	168	146	202	524	0	128	27	0
CrematogasterSubCLCMeta_s60611	B	PREDICTED: GAS2-like protein 1	NA	139.809	-5.05332	1.19814	-4.21765	2.4686e-05	0.000605237	115.585	0	40.8348	21.7639	118.665	0	144.233	87.942	260.64	53.4337	1484.56	0	124.809	0	4.80381
222-PAT-Cr-FB2_PF_(paired)_contig_23158	B	PREDICTED: facilitated trehalose transporter Tret1-like	NA	3.52963	-5.05211	1.80086	-2.80539	0.0050256	0.0464252	0	0	0	1	0	0	8	0	3	15	9	0	22	0	0
CrematogasterSubCLCMeta_rep_c5548	B	PREDICTED: ras-related protein Rab-8A isoform X1	NA	561.948	-5.04726	0.860413	-5.8661	4.46174e-09	3.21426e-07	1252.83	6.24198	60.8524	1058.51	938.483	92.6698	1160.01	1098.8	864.315	232.723	979.81	0	1152.38	0	16.6545
CrematogasterSubCLCMeta_rep_c962	B	PREDICTED: cytochrome b5-like	NA	3225.13	-5.04649	0.948088	-5.32281	1.02178e-07	5.06733e-06	7899.19	18.2544	69.1643	3640.98	13278	746.863	4985.95	12525.5	4035.79	472.086	1219.15	39.1292	43.6206	70.9542	50.0806
CrematogasterSubCLCMeta_c29985	B	nipped-B-like protein	NA	58.1644	-5.04645	0.944423	-5.34342	9.12085e-08	4.58021e-06	74.2586	0	17.5552	85.036	75.7628	0	60.4932	88.8531	82.524	78.28	340.959	0	55.7725	0	1.36534
CrematogasterSubCLCMeta_c11016	B	NA	NA	6.94859	-5.04143	1.56319	-3.22509	0.00125934	0.015777	0	0	0	0	20.8524	0	11.1846	7.54391	4.60458	0	9.89263	0	57.642	1	1
CrematogasterSubCLCMeta_c12664	B	PREDICTED: uncharacterized protein LOC105555907	NA	3.4997	-5.04034	1.70364	-2.95857	0.00309068	0.0318557	5	0	0	0	15	0	8	5	7	0	18	0	0	0	0
CrematogasterSubCLCMeta_rep_c25012	B	NA	NA	257.732	-5.03933	0.901218	-5.59169	2.24867e-08	1.32669e-06	480.652	0	2.23802	381.171	370.875	65.7279	281.602	328.2	854.372	871.712	25.0284	4.95925	336.506	2.27341	5.16049
CrematogasterSubCLCMeta_s60490	B	PREDICTED: lipid storage droplets surface-binding protein 1 isoform X1	NA	3.4982	-5.03709	1.77391	-2.83954	0.00451789	0.0425641	20.197	0	0	0	13.5478	0	9.3214	0	0	7.20377	3.24543	0	2.36737	0	0
CrematogasterSubCLCMeta_rep_c37949	B	15-hydroxyprostaglandin dehydrogenase	NA	3.47573	-5.02764	1.53457	-3.27624	0.00105198	0.0136357	6	0	0	0	23.1332	0	5.66076	9.35265	3	0	6	0	1.61053	0	0
76-PAR-Cr-FB2_PF_(paired)_contig_49864	B	PREDICTED: uncharacterized protein LOC105462195	NA	3.47057	-5.0224	1.53306	-3.27605	0.00105268	0.0136373	8	0	0	8	11	0	0	16	2	0	6	0	2	0	0
CrematogasterSubCLCMeta_rep_c17349	B	PREDICTED: cytochrome P450 4c3-like	NA	6.78847	-5.00816	1.38362	-3.6196	0.000295062	0.00489119	8	0	0	0	19	0	14	8	9	0	38	2	16	0	0
59-PAR-Cr-FB2_PF_(paired)_contig_12639	B	PREDICTED: uncharacterized protein C15orf41 homolog	NA	14.2609	-5.00445	1.551	-3.22661	0.00125268	0.0157143	99.0124	4.28511	0	24.2295	19.1821	0	31.1251	16.0591	24.8894	0	0	0	1.23221	0	0
CrematogasterSubCLCMeta_rep_c5976	B	PREDICTED: uncharacterized protein LOC105568007	NA	330.037	-5.00345	1.25451	-3.98836	6.65324e-05	0.00141096	75.341	0	66.5067	142.278	220.299	42.1405	348	197.424	406.162	196.801	3514.04	0	607	0	0
222-PAT-Cr-FB2_PF_(paired)_contig_6055	B	NA	NA	3.40778	-5.00068	1.73543	-2.88153	0.0039575	0.0384022	0	0	0	0	13.1524	0	15.2841	4.70242	11.0236	0	2.09712	0	9.25875	0	0
CrematogasterSubCLCMeta_s30762	B	PREDICTED: uncharacterized protein LOC109503658	NA	3.40102	-4.99684	1.72532	-2.89618	0.00377739	0.0371512	14	0	0	11	11	0	0	3	0	0	4.27912	0	11	0	0
CrematogasterSubCLCMeta_rep_c33721	B	NA	NA	30.4268	-4.99681	1.0802	-4.6258	3.73148e-06	0.000119176	0	0	0	88.5947	72.9425	0	49.1208	59.8466	64.3666	30	17	7.14929	89.3745	0	2.8453
76-PAR-Cr-FB2_PF_(paired)_contig_31955	B	PREDICTED: putative inorganic phosphate cotransporter	NA	3.40088	-4.9925	1.61373	-3.09376	0.00197634	0.0225167	2	0	0	0	0	0	7	11	1.67033	23	2	0	4.41026	0	0
CrematogasterSubCLCMeta_s56423	B	PREDICTED: LOW QUALITY PROTEIN: protein white, partial	NA	3.3922	-4.99081	1.63666	-3.04939	0.00229309	0.0252657	0	0	0	5	6.91648	0	3	1.27149	2.80368	28.9909	0	0	3.6523	0	0.417759
CrematogasterSubCLCMeta_rep_c20739	B	PREDICTED: uncharacterized protein LOC105150940 isoform X2	NA	3.38003	-4.9887	1.40073	-3.5615	0.000368738	0.00586686	3	0	0	10	12	0	15	2	9	0	2	0	1	0	0
CrematogasterSubCLCMeta_rep_c32179	B	PREDICTED: speckle targeted PIP5K1A-regulated poly(A) polymerase-like	NA	585.539	-4.98365	0.816555	-6.10326	1.03929e-09	8.54021e-08	710.553	29.691	22.5154	860.66	1096.4	115.447	1114.59	617.717	1078.99	987.005	1656.95	15.8465	1160.37	0	0
CrematogasterSubCLCMeta_rep_c14568	B	PREDICTED: uncharacterized protein LOC105571263	NA	4.7699	-4.98319	1.69539	-2.93926	0.00328997	0.0334484	15	0	0	19	0	0	0	13	3	19	0	0	1	0	1
CrematogasterSubCLCMeta_rep_c33625	B	PREDICTED: TGF-beta receptor type-1	NA	84.8435	-4.97621	1.55594	-3.19819	0.00138293	0.0170007	3.3884	0	0	21.3603	227.949	0	283.893	397.269	8.36417	174.958	0.00447617	0	133.946	0	30.4863
CrematogasterSubCLCMeta_rep_c5241	B	PREDICTED: probable ATP-dependent RNA helicase DDX43	NA	117.373	-4.97544	1.04287	-4.77091	1.83394e-06	6.44123e-05	178.179	0	4.24395	131.93	356.833	34.0333	253.674	70.1597	173.022	43.4456	190.855	0	476.97	0	0
CrematogasterSubCLCMeta_s54861	B	PREDICTED: receptor-type tyrosine-protein phosphatase mu	NA	3.34512	-4.97432	1.45369	-3.42186	0.000621951	0.00898005	0	0	0	7	5	0	15	4.68647	11.6033	0	5.82674	0	4.18718	0	0
CrematogasterSubCLCMeta_c21604	B	NA	NA	9.3869	-4.9699	1.12689	-4.41029	1.03231e-05	0.000285701	34.4986	0	0	6	9.49902	3.20292	10.7303	25.6763	20.4186	24	4	0	6.2914	0	0
CrematogasterSubCLCMeta_c33593	B	NA	NA	4.70603	-4.96771	1.68373	-2.95042	0.00317342	0.0324806	0	0	0	26.5055	6.48865	0	1	0	5	14	23	0	0	0	1
CrematogasterSubCLCMeta_rep_c29930	B	PREDICTED: protein O-mannosyl-transferase 2	NA	18.5387	-4.96591	1.44619	-3.4338	0.000595194	0.0086774	0	0	0	11.4782	26.5913	5.69359	91.5794	36.939	14.2319	0	58.3266	0	57.4135	0	0
CrematogasterSubCLCMeta_s59712	B	NA	NA	3.31204	-4.96187	1.73608	-2.8581	0.00426191	0.0406	0	0	0	0	0	0	8.15802	5.26381	2.50772	5.38627	22.8312	0	11.7408	0	0
CrematogasterSubCLCMeta_rep_c6317	B	PREDICTED: mucin-12	NA	6.56106	-4.95858	1.44135	-3.44023	0.000581217	0.00849691	29	0	0	6	1	0	3	2	6	0	56	2	7	0	0
CrematogasterSubCLCMeta_rep_c26194	B	PREDICTED: mothers against decapentaplegic homolog 3, partial	NA	272.488	-4.95737	0.825824	-6.00294	1.93778e-09	1.50459e-07	554.751	8.16092	20.4188	585.89	131.832	0	264.011	81.4505	573.897	1181.29	456.486	0	392.608	39.5414	21.9599
59-PAR-Cr-FB2_PF_(paired)_contig_2832	B	PREDICTED: translational activator of cytochrome c oxidase 1-like	NA	11.8747	-4.94953	1.27688	-3.87628	0.000106067	0.00209541	78.6071	0	0	31.0985	29.9592	1.72577	6.63225	5.34135	16.5756	1.84736	11.4368	0	0	0	1.81564
CrematogasterSubCLCMeta_c18395	B	uncharacterized protein LOC109863416 isoform X4	NA	3.28219	-4.94633	1.55762	-3.17558	0.00149539	0.0181137	14	0	0	0	10	0	1	7	5	0	13.9802	0	2	0	0
CrematogasterSubCLCMeta_s52201	B	MFS-type transporter SLC18B1-like isoform X3	NA	3.27336	-4.94479	1.55692	-3.17601	0.00149317	0.0181006	2.54568	0	0	0	16.9372	0	8.99913	0.887165	4.48244	0	5.25281	0	15.4618	0	0
CrematogasterSubCLCMeta_rep_c26788	B	PREDICTED: ankyrin repeat domain-containing protein 40-like	NA	145.079	-4.94172	0.821833	-6.01305	1.82062e-09	1.42517e-07	276.869	0	4.88057	306.609	233.761	32.6967	249.601	320.59	260.972	192.77	152	0	223.024	0	10.714
59-PAR-Cr-FB2_PF_(paired)_contig_5843	B	PREDICTED: exosome complex exonuclease RRP44	NA	24.4086	-4.93543	1.69737	-2.9077	0.00364099	0.0361511	137.492	6.52535	0	73.5574	0	0	0	0	55.1996	28.27	38.433	0	47.5724	0	0
CrematogasterSubCLCMeta_rep_c31194	B	PREDICTED: uncharacterized protein LOC105563879	NA	41.0753	-4.92528	0.847848	-5.80916	6.27872e-09	4.36567e-07	90.896	5.09154	0	19.4851	120.353	2.1908	47.899	25.9868	35.5956	33.6149	256.317	0	44.4269	6.26846	0
CrematogasterSubCLCMeta_s33927	B	PREDICTED: motile sperm domain-containing protein 1-like	NA	6.43189	-4.92466	1.43973	-3.42055	0.000624948	0.0090121	8.86018	0	0	8.57304	13.6459	2.2444	27.4794	1.87	19.4772	19.3623	0	0	0	0	0
76-PAR-Cr-FB2_PF_(paired)_contig_14935	B	PREDICTED: uncharacterized protein LOC105284314	NA	4.58718	-4.9207	1.31428	-3.74402	0.000181099	0.00328883	7	0	0	8	2	0	11	26	2	0	5	0	7	1	0
76-PAR-Cr-FB2_PF_(paired)_contig_37632	B	NA	NA	3.19948	-4.90981	1.5829	-3.10178	0.00192361	0.022057	0	0	0	14	1	0	2	9	6	0	17	0	3	0	0
CrematogasterSubCLCMeta_s59964	B	retrovirus-related Pol polyprotein from transposon TNT 1-94	NA	146.298	-4.90543	0.994962	-4.93027	8.2117e-07	3.22457e-05	237.913	0	0	232.314	380.117	12	365.422	134.289	120.756	367.235	232.274	0	199.902	0	40.5677
CrematogasterSubCLCMeta_s55852	B	NA	NA	3.17709	-4.90311	1.26126	-3.88747	0.000101295	0.00201109	2	0	0	3	1	0	14	1	14	4	6	0	7	0	0
76-PAR-Cr-FB2_PF_(paired)_contig_19271	B	uncharacterized protein LOC111319124	NA	3.15233	-4.88904	1.75334	-2.78842	0.00529659	0.0482586	0	0	0	8	4	0	9	8	0	0	21	0	2	0	0
CrematogasterSubCLCMeta_rep_c34171	B	PREDICTED: uncharacterized protein K02A2.6-like	NA	370.739	-4.88863	0.781212	-6.25775	3.90562e-10	3.49732e-08	549.54	4	0	615.904	747.969	0	677.941	449.764	533.673	687.454	779.728	66	756.965	35	24
CrematogasterSubCLCMeta_c19563	B	PREDICTED: uncharacterized protein LOC106709094	NA	6.23868	-4.88513	1.38502	-3.52712	0.000420103	0.0065365	7	0	0	1	3	0	0	10	6	7	59	2	12	0	0
CrematogasterSubCLCMeta_rep_c37465	B	PREDICTED: uncharacterized protein LOC108763322	NA	25.0184	-4.88486	0.844845	-5.78195	7.38379e-09	5.02465e-07	58.5077	6	0	8	66.8345	0	50.4399	18	53.6816	46.2411	58	0	34	2	0
CrematogasterSubCLCMeta_s43920	B	PREDICTED: synergin gamma-like	NA	130.263	-4.8836	1.53533	-3.18082	0.0014686	0.0178343	299.948	0	3.28485	197.42	437.27	0	0	411.884	121.958	200.089	0	0	277.658	41.1953	0
222-PAT-Cr-FB2_PF_(paired)_contig_23380	B	PREDICTED: dnaJ homolog subfamily A member 3, mitochondrial-like	NA	4.44905	-4.88188	1.74274	-2.80127	0.00509018	0.0468232	4	0	0	1	0	1	7	0	0	40	14	0	3	0	0
222-PAT-Cr-FB2_PF_(paired)_contig_23622	B	uncharacterized protein LOC111361247	NA	3.13028	-4.87601	1.65296	-2.94986	0.00317918	0.0325299	6	0	0	9	0	0	1	0	2	22	8	0	1	0	0
CrematogasterSubCLCMeta_c18139	B	PREDICTED: uncharacterized protein LOC105276541 isoform X1	NA	4.42009	-4.87125	1.40989	-3.45507	0.00055016	0.00814478	0	0	0	12	18	1	9	13	5	0	2	0	9	0	0
CrematogasterSubCLCMeta_s43164	B	PREDICTED: histone-lysine N-methyltransferase trithorax	NA	139.75	-4.871	1.02318	-4.76066	1.92962e-06	6.70843e-05	213.033	22.6467	23.2035	240.813	518.165	0	234.465	89.3992	254.049	319.741	256.051	0	55.8274	0	0
CrematogasterSubCLCMeta_s57717	B	PREDICTED: piggyBac transposable element-derived protein 4-like	NA	181.644	-4.87071	1.05416	-4.62049	3.8284e-06	0.000121784	159.584	0	0	400.538	406.532	0	339.66	178.921	172.249	475.08	396.18	56.0762	305.174	7.5376	0
CrematogasterSubCLCMeta_c10058	B	uncharacterized protein LOC109863026	NA	6.13062	-4.85556	1.20973	-4.01375	5.97604e-05	0.00128845	15	0	0	0	14	0	13	9	6	23	10	0	4	0	2
CrematogasterSubCLCMeta_rep_c25233	B	AGAP002278-PA	NA	6.1303	-4.85026	1.02945	-4.71151	2.45886e-06	8.29204e-05	17	2	0	7	8	0	5	8	18.7142	5	11	0	16	0	0
CrematogasterSubCLCMeta_rep_c4145	B	PREDICTED: transcription factor SPT20 homolog isoform X1	NA	184.479	-4.84179	1.23809	-3.91068	9.20367e-05	0.00185261	234.248	0	69.855	340.987	247.694	0	161.264	97.0773	272.165	403	754.837	0	453.396	0	0
CrematogasterSubCLCMeta_s43367	B	NA	NA	343.017	-4.83971	0.935738	-5.17208	2.315e-07	1.05523e-05	876.883	15.4679	7.23029	699.873	667.065	1.22877	562.356	658.781	462.01	510.557	267.868	0	511.524	94.0541	0
CrematogasterSubCLCMeta_s56934	B	PREDICTED: fatty acid synthase-like	NA	6240.62	-4.82686	0.961208	-5.02166	5.12275e-07	2.14337e-05	11454.4	8.14115	29.503	22189.7	4183.06	253.525	6739.76	15698.6	14877.9	14527.8	1854.6	13.6663	1421.09	1798.23	88.8664
CrematogasterSubCLCMeta_s56013	B	PREDICTED: uncharacterized protein LOC101890319	NA	3.01537	-4.82324	1.55345	-3.10486	0.00190366	0.021865	12	0	0	0	1.19432	0	8.66206	4.6316	13.8772	0	4	0	3	0	0
CrematogasterSubCLCMeta_c16913	B	PREDICTED: uncharacterized protein LOC105286098, partial	NA	8.48073	-4.81411	1.29926	-3.70528	0.000211157	0.00371635	11	2	0	0	6	0	5	13	15	62	3	1	11	0	0
CrematogasterSubCLCMeta_rep_c30320	B	PREDICTED: kalirin isoform X2	NA	75.9088	-4.81337	0.921376	-5.22411	1.74993e-07	8.19489e-06	57.7718	4.88603	0	103.72	138.675	0	170.252	78.1814	149.662	221.303	189.854	21.9179	78.3428	0	0
CrematogasterSubCLCMeta_s43762	B	PREDICTED: uncharacterized protein LOC108723020 isoform X2	NA	340.228	-4.81271	1.34184	-3.58665	0.000334952	0.00542479	1243.23	2.29965	0	1605.31	25.241	79.8986	5.72932	2.82121	1672.41	643.012	2.90898	31.7312	2.66586	4.43462	4.67933
CrematogasterSubCLCMeta_rep_c11459	B	PREDICTED: uncharacterized protein LOC108912923, partial	NA	4.21637	-4.80475	1.40352	-3.42335	0.000618542	0.00894161	6	0	0	7	2	1	14	8	0	0	10	0	20	0	0
CrematogasterSubCLCMeta_s59287	B	NA	NA	36.8852	-4.80306	1.31591	-3.65	0.00026224	0.00446134	0	0	0	7.04292	112.469	5.66757	165.204	2.11635	99.8685	19	193.306	0	11.8226	0	7.88513
CrematogasterSubCLCMeta_rep_c15442	B	NA	NA	8.27331	-4.79851	1.44105	-3.32987	0.000868853	0.0116955	9	0	0	8	25.1047	0	39	0	19.6165	21	6.94555	3.14337	0	0	0
CrematogasterSubCLCMeta_s53156	B	PREDICTED: nucleolar protein 12	NA	30.1889	-4.79214	1.48871	-3.21897	0.0012865	0.0160367	66.078	0	0	83.569	0	0	54.947	44.0196	131.772	13.1378	0	0	71.0251	0	12.0106
CrematogasterSubCLCMeta_rep_c4047	B	PREDICTED: Krueppel homolog 1-like	NA	1985.1	-4.77486	0.545316	-8.75613	2.02067e-18	7.33365e-16	3694.99	48.0311	327.367	3056.45	4328	184.488	2834.66	3264.93	1894.26	4817.04	3681.57	51.6999	2968.22	10.4925	139.869
CrematogasterSubCLCMeta_rep_c26726	B	PREDICTED: uncharacterized protein LOC108691018	NA	4.12769	-4.77302	1.51719	-3.14596	0.00165541	0.0196594	9	0.809307	0	0	13.4338	0	0.745692	2.17734	2.47371	0	25.3623	0	17.0446	0	0
CrematogasterSubCLCMeta_c28878	B	uncharacterized protein LOC111088387	NA	4.10699	-4.77008	1.66207	-2.86996	0.00410518	0.0395152	0	0	0	0	4	0	2	7	6	0	35	1	16	0	0
CrematogasterSubCLCMeta_c971	B	PREDICTED: uncharacterized protein K02A2.6-like isoform X2	NA	682.396	-4.77003	0.45322	-10.5248	6.64279e-26	4.97244e-23	1157.28	32.2877	47	1182.89	2119.28	9	1380.16	718.886	1021.85	940.531	862.998	29	1220.44	26	118.377
CrematogasterSubCLCMeta_s56122	B	NA	NA	5.77171	-4.76804	1.39358	-3.42144	0.000622904	0.0089911	12.4656	0	0	7.09116	8.89659	0	0	5.75648	12.2728	18.2617	0.32526	0	25.4861	0	2.28308
CrematogasterSubCLCMeta_s54243	B	PREDICTED: conserved oligomeric Golgi complex subunit 8	NA	21.0536	-4.76413	1.69931	-2.80356	0.00505416	0.0466082	0	0	0	0	17.5933	0	69.1681	43.3113	45.0824	0	21.9157	8.32108	136.914	0.0434496	0
CrematogasterSubCLCMeta_c15844	B	NA	NA	4.1046	-4.76306	1.33844	-3.55866	0.000372752	0.00591306	10	0	0	0	5	0	13	5	15	13	1	1	1	0	0
CrematogasterSubCLCMeta_s56900	B	PREDICTED: EH domain-containing protein 3	NA	813.42	-4.76266	1.5105	-3.15303	0.00161584	0.019308	0	85.4049	218.315	970.525	1039	5.59236e-07	1598.98	2286.2	2452.52	537.381	3416.66	0	561.09	0	0
CrematogasterSubCLCMeta_c21466	B	PREDICTED: uncharacterized protein LOC108771321	NA	4.09385	-4.76191	1.43744	-3.31276	0.000923786	0.0122797	6	0	0	17	2	1	22	0	4	0	6	0	8	0	0
CrematogasterSubCLCMeta_rep_c26590	B	PREDICTED: guanine nucleotide-binding protein subunit beta-like protein isoform X1	NA	613.801	-4.76023	0.892002	-5.33657	9.47202e-08	4.72365e-06	67.883	19.099	18.5745	2195.65	723.585	38.6833	2207.57	35.1788	2437.45	148.246	21.7957	97.2553	1855.51	36.8453	19.2076
CrematogasterSubCLCMeta_rep_c15199	B	PREDICTED: Down syndrome cell adhesion molecule-like	NA	13.1324	-4.75826	1.66345	-2.86048	0.00423006	0.0404167	0	0.0132506	0	0	22.4261	0	37.5323	21.7054	8.47609	38.7216	82.4251	5.49023	0	0	0
CrematogasterSubCLCMeta_rep_c26246	B	NA	NA	16.0783	-4.75775	1.07765	-4.41494	1.01039e-05	0.000281423	3.61552	0	0	20.2125	62.6513	6.40249	44.0874	7.27181	62.4276	12	35.4753	0	10.1829	0	0
CrematogasterSubCLCMeta_s32658	B	PREDICTED: elongation factor 1-alpha	NA	15846.1	-4.75431	1.08679	-4.37462	1.21642e-05	0.000330357	1316.6	4286.23	67.8768	44582.8	16334	255.299	19838.2	64404.2	558.553	1721.83	38280.7	490.185	55576.5	28.5283	36.8446
CrematogasterSubCLCMeta_rep_c39496	B	PREDICTED: acyl-CoA Delta(11) desaturase-like	desaturase 1, isoform E [Drosophila melanogaster]	2473.2	-4.75092	1.20692	-3.9364	8.27147e-05	0.0016956	48.3956	28.9383	121.606	17974.9	120.27	202.954	15259.9	45.5713	39.7265	3771.78	62.0908	332.927	275.455	220.843	29.2745
CrematogasterSubCLCMeta_s52495	B	PREDICTED: uncharacterized protein LOC105457130	NA	193.942	-4.74664	1.02341	-4.63808	3.51663e-06	0.000113296	308.455	0	0	289.531	258.937	30.412	445.941	265.113	325.273	272.896	559.83	0	322.495	42.0171	0
CrematogasterSubCLCMeta_rep_c32594	B	NA	NA	21.3743	-4.74363	1.21566	-3.9021	9.53624e-05	0.00190673	11.0928	0	1.21613	59.1258	54.4803	0	3.21338	19.0251	74.3287	0	23.0583	0	96.8468	6.54482	0
CrematogasterSubCLCMeta_rep_c13456	B	uncharacterized protein LOC105691027	NA	1693.34	-4.74137	0.853511	-5.55514	2.77397e-08	1.59401e-06	2480.43	74.1188	51	6232	45.9678	28	1977	4565	5293	3620	587	20.8776	435.418	400.738	50.6707
CrematogasterSubCLCMeta_rep_c10099	B	PREDICTED: uncharacterized protein LOC106742680	NA	2.82913	-4.72919	1.51804	-3.11532	0.00183748	0.0212475	16	0	0	4.10472	2	0	7	3.99627	5.63714	0	0	0	5	0	0
CrematogasterSubCLCMeta_rep_c32296	B	uncharacterized protein LOC109859484	NA	31.3959	-4.71978	1.26215	-3.73946	0.000184415	0.00333452	24	0	0	45	91	12	35	62	42	0	31	0	162	0	0
CrematogasterSubCLCMeta_s60338	B	NA	NA	12.8727	-4.71481	1.56923	-3.00453	0.00265989	0.0283139	0	0	1.17807	0	12.7531	3.86783	0	7.82408	13.2813	20.872	106.186	0	56.8165	0	0
CrematogasterSubCLCMeta_rep_c1732	B	PREDICTED: LIM and SH3 domain protein Lasp	NA	392.291	-4.70945	0.786772	-5.98579	2.15344e-09	1.6586e-07	1791.02	0	35.5153	374.004	713.44	11.5435	956.021	21.2781	705.498	124.524	1133.31	37.4274	406.99	30.2396	43.2025
CrematogasterSubCLCMeta_c18741	B	NA	NA	2.78657	-4.70911	1.61601	-2.91404	0.00356781	0.0356164	2	0	0	21	8	0	2.68026	1	3.5286	0	0	0	4.86013	0	0
CrematogasterSubCLCMeta_s60396	B	PREDICTED: zinc finger protein 260-like	NA	2.78995	-4.70617	1.30768	-3.59888	0.000319595	0.0052202	10.3195	0	0	3.58658	0	0	6	4.36544	3.79054	10	1.99395	0	2.64248	0	0
CrematogasterSubCLCMeta_s54249	B	PREDICTED: probable peroxisomal acyl-coenzyme A oxidase 1	NA	245.081	-4.70598	0.986085	-4.77239	1.82049e-06	6.3987e-05	73.2615	0	0	350.639	363.597	0	588.324	241.002	652.086	730.56	611.495	62.8825	228.799	5.14139	31.1094
CrematogasterSubCLCMeta_rep_c7435	B	PREDICTED: alaserpin-like isoform X14	NA	215.6	-4.70248	0.804453	-5.84556	5.04868e-09	3.57791e-07	331.5	15.0853	0	19.1375	61.985	12.068	592.095	485.316	931.444	102.107	178.247	28.8326	647.269	18.2109	8.23111
CrematogasterSubCLCMeta_c17269	B	PREDICTED: uncharacterized protein LOC105257220	NA	5.50496	-4.69995	1.46988	-3.19751	0.00138617	0.0170232	12	0	0	0	3	0	9	3	13	9	0	0	38	0	2
CrematogasterSubCLCMeta_c31812	B	NA	NA	5.50369	-4.69574	1.41415	-3.32054	0.000898435	0.0119971	7.70712	0	0	23.5227	1	0	4	1	0	27.4918	16	2	4	0	0
76-PAR-Cr-FB2_PF_(paired)_contig_37172	B	PREDICTED: THO complex subunit 2 isoform X1	NA	3.9005	-4.68823	1.46942	-3.19053	0.0014201	0.0173553	4	0	1	0	2	0	6	18	7	3	0	0	19	0	0
CrematogasterSubCLCMeta_c5837	B	PREDICTED: uncharacterized protein LOC105560198	NA	7.70332	-4.6873	1.0004	-4.68543	2.79371e-06	9.26749e-05	9	0	0	14.4568	11	2.31747	5	11	6	21	19	0	24.0208	1	0
CrematogasterSubCLCMeta_s43810	B	PREDICTED: uncharacterized protein LOC105565840	NA	1245.92	-4.68497	1.08204	-4.32974	1.49283e-05	0.000393599	5395.48	135.573	0	3811.68	405.669	12.7815	1313.25	3279.95	2405.28	247.887	878.471	295.822	890.568	0	29.4803
CrematogasterSubCLCMeta_s57723	B	PREDICTED: zinc finger HIT domain-containing protein 3	NA	26.6612	-4.68287	1.38535	-3.38028	0.000724122	0.0100991	95.0824	0	0	96.6105	4.1198	0	23.3845	21.5377	0	0	122.622	6.28228	60.6696	0	5.12197
CrematogasterSubCLCMeta_rep_c29243	B	PREDICTED: uncharacterized protein LOC105564159 isoform X1	NA	76.4458	-4.68153	1.21741	-3.84549	0.000120313	0.00232657	59.5629	0	12.2741	19.0313	0	11.9054	134.745	144.442	20.532	173.644	683.02	6.51874	17.8291	0	0
CrematogasterSubCLCMeta_s58951	B	PREDICTED: uncharacterized protein LOC105204142, partial	NA	5.43654	-4.68101	1.66847	-2.80557	0.00502277	0.046408	0	0	0	0	24.4051	0	11.5726	14.6626	1	0	15.3168	0	19.4187	0	2.43862
CrematogasterSubCLCMeta_rep_c39070	B	NA	NA	77.8678	-4.67842	0.937255	-4.99162	5.98742e-07	2.44535e-05	175	0	6.10711	190.263	93.026	25.079	147.367	65.5891	152.148	188	129.468	0	59.9918	0	0
CrematogasterSubCLCMeta_c10686	B	NA	NA	2.72884	-4.67551	1.55282	-3.01099	0.002604	0.0278483	6	0	0	0	9.85343	0	6	12	1.11249	0	4.38756	0	3.09279	0	0
222-PAT-Cr-FB2_PF_(paired)_contig_26241	B	PREDICTED: neuronal acetylcholine receptor subunit alpha-5-like isoform X2	NA	5.38861	-4.66646	1.18584	-3.93516	8.31397e-05	0.00170358	14.0004	0	0	8	14.0003	0	12.0006	8.00019	3	0	17.0016	2	9	0	0
CrematogasterSubCLCMeta_rep_c23112	B	PREDICTED: uncharacterized protein LOC108747733 isoform X2	NA	13476.5	-4.6572	1.04101	-4.47375	7.68601e-06	0.00022262	10244.7	171.758	5342.08	30254.5	351.62	91.526	23455.4	62130.7	26243.9	14902.9	7272.13	47.8043	24140.6	29.3583	65.7846
CrematogasterSubCLCMeta_s59917	B	PREDICTED: general transcriptional corepressor trfA-like isoform X2	NA	72.7285	-4.65234	1.38075	-3.36944	0.000753215	0.0104199	26.2047	0	0	149.268	78.0816	0	87.4215	97.2281	220.065	0	298.842	0	220.963	0	32.3705
CrematogasterSubCLCMeta_rep_c28243	B	PREDICTED: origin recognition complex subunit 5	NA	51.0881	-4.64664	0.985543	-4.7148	2.41948e-06	8.19153e-05	135	0	4.54102	189	122.257	14.2515	13.9788	21.6785	194.416	10.9801	99.7971	0	14.7662	0	1.6622
CrematogasterSubCLCMeta_s57377	B	PREDICTED: uncharacterized protein LOC106063474	NA	12.1389	-4.63853	1.39911	-3.31534	0.000915322	0.0121976	26.7707	0	0	60.7458	0	0	18.4155	16.1909	21.8684	0	23.8136	4.88266	19.8359	0	0
CrematogasterSubCLCMeta_c9294	B	PREDICTED: uncharacterized protein LOC105448116	NA	9.68486	-4.63577	1.41558	-3.27482	0.00105731	0.0136825	23	1	0	27	8	0	27	2	0	52	6	0	0	0	2.51323
CrematogasterSubCLCMeta_s54140	B	PREDICTED: trichohyalin-like	NA	346.238	-4.63498	1.03431	-4.48122	7.42169e-06	0.000216272	140.201	0	15.9981	59.9094	148.454	71.1723	1065.04	1821.8	1461.98	315.368	44.2868	8.71412	30.549	1.94891	48.1307
CrematogasterSubCLCMeta_rep_c33950	B	NA	NA	7.43608	-4.62098	1.51263	-3.05493	0.00225114	0.0249137	26.5937	0	0	0	27.6605	3.40345	1.27841	0	20.817	6.08056	29.031	0	8.00186	0	0
CrematogasterSubCLCMeta_rep_c22951	B	PREDICTED: elongation of very long chain fatty acids protein AAEL008004-like	uncharacterized protein Dmel_CG18609 [Drosophila melanogaster] Dembeck FA Elongase	4381.13	-4.61458	1.14806	-4.01947	5.83292e-05	0.00126557	158.171	42.1229	50.1751	12115.4	252.102	1628.33	8662.91	12391	18367	12365.7	803.665	24.9263	215.964	43.1064	6.34514
CrematogasterSubCLCMeta_c9570	B	PREDICTED: uncharacterized protein LOC108723882	NA	24.2787	-4.60907	0.940893	-4.89861	9.65173e-07	3.69023e-05	49	0	0	65	26	10	17	64	29	45	34	0	37	0	0
CrematogasterSubCLCMeta_rep_c5471	B	PREDICTED: U1 small nuclear ribonucleoprotein A isoform X2	NA	49.9567	-4.60163	0.940184	-4.89439	9.86117e-07	3.75532e-05	116	0	19	76	148	0	68	88	105	84	74	2	4	0	1
CrematogasterSubCLCMeta_s44247	B	PREDICTED: Fanconi anemia group I protein	NA	290.638	-4.60154	0.402336	-11.437	2.73019e-30	3.11418e-27	466.819	9.80578	24.6546	542.182	559.394	2.82435	525.206	491.391	538.75	375.843	477.04	17.471	510.911	43.6927	23.4824
CrematogasterSubCLCMeta_s54125	B	PREDICTED: uncharacterized protein LOC105565446 isoform X1	NA	21.6823	-4.59696	1.47116	-3.12473	0.00177971	0.0207648	40.3295	0	0	35.7167	60.9282	8.90683	12.9251	92.3826	55.3676	0	0	0	24.0663	0	0
CrematogasterSubCLCMeta_s54767	B	PREDICTED: thioredoxin domain-containing protein 12-like	NA	3.66738	-4.59316	1.59493	-2.87985	0.00397869	0.0385666	19	0.798787	0	0	9	0	4	7.31861	9	0	0	0	8	0	0
CrematogasterSubCLCMeta_s43355	B	PREDICTED: mitochondrial-processing peptidase subunit alpha isoform X4	NA	101.27	-4.58751	0.897065	-5.11391	3.15556e-07	1.39588e-05	249.335	0	0	146.038	117.129	0	81.5739	216.918	143.927	249.705	190.061	32.5446	146.285	1.48972	9.56365
CrematogasterSubCLCMeta_s52457	B	uncharacterized protein LOC111051184	NA	175.46	-4.58414	1.04508	-4.38642	1.15232e-05	0.000314196	183.562	5	0	1110.06	65.325	49.7262	165.376	381.078	578.903	120.886	2.85064	11	13.8835	5	2.16819
CrematogasterSubCLCMeta_rep_c23813	B	PREDICTED: cytochrome P450 4C1-like isoform X1	Cyp4s3 [Drosophila melanogaster] Dembeck Cytochrom P450	270.514	-4.58006	0.813856	-5.6276	1.8273e-08	1.1067e-06	1756.93	22.8809	7.39207	117.64	339.414	10.745	689.498	324.383	71.5642	561.013	27.9952	9.65812	129.821	53.2632	5.74323
CrematogasterSubCLCMeta_c10435	B	protein FAM200B-like	NA	6.96208	-4.5789	1.33527	-3.42919	0.000605384	0.00879652	19	0	2	0	18	0	15	8	23	0	4	0	22	0	1
CrematogasterSubCLCMeta_s58326	B	PREDICTED: uncharacterized protein LOC105459086	NA	3.59497	-4.56976	1.42903	-3.19779	0.00138483	0.0170154	10	0	0	18.7409	9.4709	1	0	2	6.55008	0	2.67219	0	6	0.400102	0
CrematogasterSubCLCMeta_s44151	B	PREDICTED: lipid phosphate phosphohydrolase 1-like isoform X1	NA	290.247	-4.56641	1.04711	-4.36095	1.29499e-05	0.000349121	395.989	86.1654	0	585.7	421.569	0	222.805	247.787	651.399	152.712	1701.96	0	345.096	10.3489	12.8587
CrematogasterSubCLCMeta_rep_c15670	B	NA	NA	7.29312	-4.56308	1.50902	-3.02387	0.00249566	0.0270313	0	3	0	5	0	0	6	9	6	39	40	0	10	0	0
CrematogasterSubCLCMeta_s53303	B	PREDICTED: probable low affinity copper uptake protein 2	NA	5.01354	-4.56093	1.37611	-3.31438	0.000918474	0.0122294	0	0	0	0	21	1	7	6	12.8289	1	14	1	19	0	0
CrematogasterSubCLCMeta_rep_c38812	B	PREDICTED: fas-associated death domain protein isoform X1	NA	9.22079	-4.55957	1.47157	-3.09843	0.00194548	0.0222631	0	0	0	8.41532	14.2521	0	2.58762	2.61002	1.26585	87.3448	9.39529	4	13.1121	0	6.13538e-06
CrematogasterSubCLCMeta_s52711	B	PREDICTED: LIM and SH3 domain protein Lasp isoform X2	NA	196.782	-4.55482	1.10512	-4.12157	3.76301e-05	0.000871313	567.05	0	12.7173	130.378	272.361	71.8318	387.103	203.424	257.972	205.978	774.148	0	324.312	0	0
CrematogasterSubCLCMeta_s44722	B	PREDICTED: zinc transporter ZIP11 isoform X2	NA	82.2539	-4.55061	0.940872	-4.83659	1.32084e-06	4.82668e-05	84.0756	0	25.5545	182.315	43.686	10.738	180.314	120.137	150.514	108.755	214.781	0	202.801	0	0
CrematogasterSubCLCMeta_rep_c21536	B	PREDICTED: uncharacterized protein LOC105144187	NA	4.96694	-4.54332	1.39377	-3.25973	0.00111517	0.0143229	10	0	0	0	10.3677	0	18.4421	15.1753	4	0	6.43489	2.23292	12.8009	0.379285	0
CrematogasterSubCLCMeta_c17400	B	PREDICTED: uncharacterized protein LOC105555687	NA	4.94506	-4.54111	1.56053	-2.90998	0.00361453	0.0359479	0	0	1	29	2	0	0	0	5	8	24	1	12	0	0
CrematogasterSubCLCMeta_s59019	B	PREDICTED: uncharacterized protein LOC105838349	NA	9.22135	-4.5349	1.58142	-2.86761	0.0041358	0.0396982	10	0	0	0	5	4	9	18.858	3	0	105.642	0	4.49914	0	0
CrematogasterSubCLCMeta_s56514	B	NA	NA	3.50357	-4.53469	1.38589	-3.27203	0.00106778	0.0138031	0	0	0	9	12	1	9	2	12	0	4	0	8	0	0
CrematogasterSubCLCMeta_s59780	B	PREDICTED: uncharacterized protein LOC105285007	NA	64.2109	-4.53414	1.01052	-4.48692	7.22606e-06	0.000211085	17.1316	17.6998	0	25.3069	158.778	6.53185	99.1226	68.8261	126.646	140.737	293.692	0	98.6675	0	0
CrematogasterSubCLCMeta_c8207	B	uncharacterized protein LOC111363578	NA	3.4993	-4.52878	1.52618	-2.96739	0.00300338	0.0311641	0	0	0	0	7	0	2.22988	3	2.34716	22	2	0	16	1	0
CrematogasterSubCLCMeta_s52829	B	PREDICTED: exportin-2	NA	57.9051	-4.52753	1.09195	-4.14627	3.3794e-05	0.000792836	98.5858	0	0	176.888	217.697	0	119.097	19.4986	41.8132	45.3304	0	15.0663	175.525	4.7595	6.28487
CrematogasterSubCLCMeta_c17472	B	PREDICTED: uncharacterized protein LOC105556197	NA	11.1976	-4.5208	1.55953	-2.89882	0.00374571	0.0369305	0	1	4	15	0	0	0	5	10	31	76	0	48	0	0
CrematogasterSubCLCMeta_s52984	B	PREDICTED: cytochrome P450 6k1-like	Cyp9f2 [Drosophila melanogaster] Dembeck Cytochrom P450	57.0449	-4.51259	1.59467	-2.82979	0.00465786	0.0436758	87.9574	0	27.0537	0	0	0	250.412	53.794	237.96	34.829	150.018	0	91.9127	0	0
CrematogasterSubCLCMeta_s53395	B	PREDICTED: uncharacterized protein LOC105556620	NA	52.8209	-4.51198	1.57302	-2.86836	0.00412609	0.0396526	85.9744	0	24.9673	0	108.769	0	127.395	131	142.852	0	212.936	0	23.8717	0	0
CrematogasterSubCLCMeta_s60211	B	PREDICTED: uncharacterized protein LOC105568133	NA	6.84197	-4.51079	1.51504	-2.97734	0.00290762	0.0304072	0	0	0	0	9.37936	0	14.4704	11.1237	13.9072	0	44.1077	2.39156	20.6015	1.13311	0
222-PAT-Cr-FB2_PF_(paired)_contig_11891	B	PREDICTED: uncharacterized protein LOC105205003	NA	13.7949	-4.50749	1.41435	-3.18697	0.00143773	0.0175171	37.0937	0	0	18.9472	60.4809	0	0	16.523	20.2393	0	15.6257	0	46.4387	6	0
CrematogasterSubCLCMeta_s59716	B	PREDICTED: small heat shock protein hspG3 isoform X1	NA	88.3326	-4.50564	1.20446	-3.7408	0.000183437	0.00332315	177.262	0	0	67.1412	34.5192	38.5094	72.3181	128.411	89.3425	332.506	157.947	0	295.646	0	0
CrematogasterSubCLCMeta_rep_c13388	B	PREDICTED: uncharacterized protein LOC105207095	NA	49.6799	-4.50478	0.690308	-6.52575	6.76624e-11	7.13987e-09	97.7405	6.34914	0	93.0446	91.1571	0	95.4839	100.064	89.4921	26.2486	125.62	6.70494	51.3828	0	8.92023
CrematogasterSubCLCMeta_rep_c29931	B	PREDICTED: uncharacterized protein LOC107981809	NA	153.04	-4.49563	1.2668	-3.54881	0.00038698	0.00609436	0	7.9583	3.32763	186.796	768.768	0	0	8	19.0015	529.276	555.236	13.7952	376.552	29.1269	13.9241
CrematogasterSubCLCMeta_s58221	B	PREDICTED: protein PF14_0175-like isoform X2	NA	4.80653	-4.49468	1.47839	-3.04025	0.00236382	0.025902	15.5074	0	0	11	15	2	23.0395	2.06943	3.33503	0	4.36909	0	0	0	0
222-PAT-Cr-FB2_PF_(paired)_contig_37763	B	copia protein, partial	NA	2.39031	-4.49345	1.54275	-2.91263	0.00358401	0.0357409	0	0	0	4	1	0	10	2	6	0	11	0	6	0	0
CrematogasterSubCLCMeta_c18455	B	PREDICTED: uncharacterized protein LOC105391048	NA	60.0363	-4.48212	1.20342	-3.72449	0.000195707	0.00349972	126.139	0	26.3638	159.805	184.148	0	100.782	28.7698	101.49	0	110.78	0	133.496	0	3.12991
CrematogasterSubCLCMeta_s44166	B	PREDICTED: tyrosine--tRNA ligase, cytoplasmic	NA	86.392	-4.48101	0.954947	-4.69242	2.69992e-06	9.00106e-05	142.952	14.8259	0	83.2871	180.603	0	297.698	131.051	154.099	80.9662	128.352	0	136.286	21.3418	0
CrematogasterSubCLCMeta_rep_c36774	B	PREDICTED: acetyl-CoA carboxylase isoform X1	NA	127.012	-4.47943	1.2088	-3.70569	0.000210813	0.00371205	268.797	3	1	16.5219	1	5.02978	110.889	0	1	408.162	1028.41	8	262.847	32	8
CrematogasterSubCLCMeta_s52788	B	NA	NA	507.212	-4.4794	1.30205	-3.44027	0.00058113	0.00849691	995.314	0	0	987.508	951.249	22.7987	1067.27	788.225	1583.89	863.72	479.913	0	0	177.573	26.0442
CrematogasterSubCLCMeta_s57044	B	PREDICTED: probable cytochrome P450 6a14	Cyp9f2 [Drosophila melanogaster] Dembeck Cytochrom P450	1820.06	-4.47344	0.573016	-7.80684	5.86405e-15	1.18535e-12	2730.91	229.513	298.808	2890.87	4742.66	7.45632	3679	2559.4	2592	3551.93	1374.41	71.8052	3699.14	128.308	73.1805
CrematogasterSubCLCMeta_rep_c22442	B	PREDICTED: nucleoside diphosphate-linked moiety X motif 19, mitochondrial-like	NA	303.613	-4.47193	0.693759	-6.44594	1.14886e-10	1.14903e-08	721.61	4.12602	43.1067	628.768	446.356	0	342.38	554.363	589.197	642.422	115.418	23.4968	534.439	9.93253	66.0893
CrematogasterSubCLCMeta_s60401	B	PREDICTED: kinesin-like protein KIF12 isoform X2	NA	6.70119	-4.46932	1.2748	-3.5059	0.000455059	0.00696057	0	0	0	20.3461	15.224	2.60559	12.1398	3.71058	5.3178	31	7.30469	0	8.48385	0	0
CrematogasterSubCLCMeta_s43210	B	DEAD-box helicase Dbp80-like	NA	129.979	-4.46779	0.875065	-5.10567	3.29623e-07	1.45274e-05	511.93	15.1657	0	102.737	313.823	0	162.131	206.408	527.773	87.7128	43.3742	14.9659	17.1916	11.5655	16.3231
CrematogasterSubCLCMeta_s54246	B	PREDICTED: V-type proton ATPase subunit F	NA	187.031	-4.46654	0.903245	-4.94499	7.61473e-07	3.00493e-05	386.867	6.77915	27.1839	494.61	52.8207	0	165.342	646.868	638.353	275.876	68.475	1.55819	29.5116	45.9932	2.95845
CrematogasterSubCLCMeta_c30712	B	PREDICTED: superoxide dismutase	NA	4.67866	-4.45857	1.56014	-2.8578	0.00426588	0.0406094	11	0	0	6.65511	32.2809	0	1	0	1.27795	12	0	0	7.65701	0	1.5536
CrematogasterSubCLCMeta_c15961	B	PREDICTED: golgin subfamily B member 1-like isoform X2	NA	4.67591	-4.45819	1.59349	-2.79775	0.00514607	0.0471652	0	0	0	0	13	0	21	11	12	0	6	0	10	0	2
CrematogasterSubCLCMeta_rep_c11332	B	PREDICTED: protein MAK16 homolog A	NA	219.611	-4.45066	1.14932	-3.87241	0.000107763	0.00212017	0	26.1521	19.9819	417.52	21.5945	45.4904	7.50988	326	340.77	236	1803	3.48783	478.911	0	3.81905
59-PAR-Cr-FB2_PF_(paired)_contig_26336	B	PREDICTED: uncharacterized protein LOC107981685	NA	3.32419	-4.4502	1.46984	-3.02767	0.00246447	0.0267661	11	1.3244	0	4.57016	15.6813	0	0	0	1	9	8	0	2	0	0
CrematogasterSubCLCMeta_s54269	B	PREDICTED: fatty acid synthase-like	FASN2 [Drosophila melanogaster] mb FA synthase Chung 2014	1858.46	-4.44189	0.920826	-4.82381	1.4084e-06	5.1193e-05	516.9	31.0377	220.88	1291.89	397.975	28.2655	14252.6	749.259	691.822	7361.41	3060.52	14.7791	211.53	365.64	221.458
CrematogasterSubCLCMeta_rep_c29945	B	PREDICTED: uncharacterized protein LOC105282194	NA	45.2211	-4.43977	0.889419	-4.99176	5.98302e-07	2.44535e-05	59.0427	0	16.0825	40.066	97.9022	0	48.1034	35.4964	82.5633	184.125	90.5125	6.25398	59.7779	0	0
CrematogasterSubCLCMeta_s57615	B	NA	NA	3.28793	-4.43763	1.59478	-2.7826	0.00539259	0.0489378	0	0	0	2.00479	23.0064	0	2	8	1.07618	1	0	0	14.4057	1	0
76-PAR-Cr-FB2_PF_(paired)_contig_10560	B	hypothetical protein LOTGIDRAFT_182014, partial	NA	3.27363	-4.43278	1.55476	-2.85111	0.00435669	0.0412809	1	0	0	0	2	1	12	13	4	0	19	0	1	0	0
CrematogasterSubCLCMeta_s58118	B	28S ribosomal protein S27, mitochondrial	NA	6.43807	-4.42915	1.27476	-3.4745	0.000511814	0.00766234	15.8422	0	0.21851	7.17102	11.7231	0	16.1006	3.45209	22.9342	0	3.44706	3.10738	20.9992	0	0
59-PAR-Cr-FB2_PF_(paired)_contig_12933	B	NA	NA	6.22689	-4.4246	1.42805	-3.09834	0.00194607	0.0222631	12	0	0	0	15	0	10	0	16	30	7	0	6	0	3
CrematogasterSubCLCMeta_rep_c35230	B	PREDICTED: poly(U)-specific endoribonuclease homolog	NA	956.297	-4.42164	0.500069	-8.84206	9.39722e-19	3.51713e-16	1376.87	130.833	17.7337	926.717	1832.42	53.219	2960.28	601.765	2542.24	1276.92	2351.94	135.087	1193.67	60.1594	33.8925
CrematogasterSubCLCMeta_c24195	B	PREDICTED: nascent polypeptide-associated complex subunit alpha isoform X1	NA	62.7084	-4.42088	1.27806	-3.45905	0.000542091	0.00804023	16.2507	0	0	83.2085	102.483	0	61.2426	179.44	147.955	101.478	289.044	28.2541	0	2.30715	0
CrematogasterSubCLCMeta_s57066	B	PREDICTED: tyrosine-protein kinase Btk29A isoform X1	NA	28743.6	-4.41559	0.704094	-6.2713	3.58035e-10	3.24242e-08	92180.7	6269.85	424.778	47137	48062.3	1061.66	5144.44	71061	50032.4	28263.3	62502.9	3687.05	33043.6	344.767	765.64
CrematogasterSubCLCMeta_rep_c11620	B	PREDICTED: DNA polymerase epsilon catalytic subunit A	NA	16.0558	-4.40777	1.50599	-2.92682	0.00342449	0.0344947	13	1	0	0	12	0	20	1	16	0	201	0	18	0	7
CrematogasterSubCLCMeta_c32976	B	serine protease 132 precursor	NA	4.51196	-4.40442	1.28371	-3.43101	0.000601334	0.00875892	0	0	0	5.1421	10	1.39162	4	1.74776	1.56005	25	19	0	4	0	1.48816
CrematogasterSubCLCMeta_rep_c37642	B	PREDICTED: uncharacterized protein LOC108777330	NA	109.002	-4.40082	0.811152	-5.42539	5.78284e-08	3.06458e-06	151.971	12.5715	19.2614	506.744	260.17	0	4.16539	239.162	128.405	159.342	70.8665	2.91471	109.956	3.83921	12.8991
CrematogasterSubCLCMeta_s52534	B	PREDICTED: probable cytochrome P450 6a14	Cyp9f2 [Drosophila melanogaster] Dembeck Cytochrom P450	89.0299	-4.39305	0.861482	-5.09941	3.40714e-07	1.49886e-05	168.725	0	0	111.788	154.274	14.1718	287.072	131.511	139.609	163.586	71.3669	1.8797	124.953	26.4072	0
CrematogasterSubCLCMeta_rep_c4816	B	PREDICTED: nucleolar GTP-binding protein 1	NA	361.826	-4.3796	0.995882	-4.39771	1.09401e-05	0.000300176	199.859	0	35.0226	260.033	264.356	76.386	9.42763	528.699	613.379	475.938	2827.97	31.4323	780.981	0	39.1094
CrematogasterSubCLCMeta_rep_c17712	B	NA	NA	7.89503	-4.37674	1.41356	-3.09625	0.00195987	0.0223711	0	0	4	0	9	0	14	19	9	21	44	0	9	0	0
CrematogasterSubCLCMeta_c15710	B	NA	NA	3.13217	-4.37249	1.4244	-3.06971	0.00214264	0.0239537	10	0	0	0	5	0	2	3	14	0	4	0	12	0	1
CrematogasterSubCLCMeta_rep_c22323	B	PREDICTED: uncharacterized protein LOC105201075	NA	23.1218	-4.36618	1.55839	-2.80172	0.00508303	0.0467754	8.39218	0	0	53.7794	36.8743	0	0	0	0	94.5416	106.221	3.76264	68.587	0	8.49319
CrematogasterSubCLCMeta_s57074	B	PREDICTED: poly(U)-specific endoribonuclease homolog	NA	4681.43	-4.36231	0.974229	-4.4777	7.54518e-06	0.000219071	5936.02	124.694	119.702	6083.55	5060.2	1891.57	7334.46	16485.1	13673.3	6928.24	2069.54	25.336	6037.04	0	112.173
CrematogasterSubCLCMeta_s44806	B	NA	NA	14.868	-4.3621	0.807812	-5.39989	6.66806e-08	3.45348e-06	25.1907	3.04658	0	24.6332	41.2646	0	14.6021	13.6504	8.59333	27.1139	51.0266	0	25.6302	4.01961	0
CrematogasterSubCLCMeta_rep_c22684	B	PREDICTED: peptidyl-prolyl cis-trans isomerase-like 4	NA	188.307	-4.35504	1.29861	-3.35363	0.000797599	0.010936	104.696	0	0	419.726	239.236	91.9583	452.85	345.825	289.416	295.219	664.368	0	118.602	0	0
CrematogasterSubCLCMeta_s54268	B	PREDICTED: integrin alpha pat-2-like	NA	8.30024	-4.35314	1.54603	-2.8157	0.00486716	0.0452281	0	1.26599	0	47	7	0	23.1097	20.5651	19.8562	0	0	3	6	0	0
CrematogasterSubCLCMeta_rep_c11229	B	NA	NA	6.17452	-4.34911	1.13321	-3.83786	0.000124109	0.00238783	10	1	0	11	9	2	0	9	24	14	12	0	6	0	0
CrematogasterSubCLCMeta_rep_c26722	B	PREDICTED: uncharacterized protein LOC105196020	NA	21.1928	-4.34897	1.12201	-3.87604	0.00010617	0.00209656	28.3673	0	0	72.734	39.4274	2.99675	9.85927	28.5163	14.2075	64.1034	0	0	60.7675	0	7.95907
CrematogasterSubCLCMeta_rep_c8152	B	PREDICTED: fatty acyl-CoA reductase 1-like	uncharacterized protein Dmel_CG13091, isoform A [Drosophila melanogaster] Dembeck FA reductase	273.607	-4.34401	1.20813	-3.59565	0.000323587	0.0052764	994.886	20.4274	119.704	827.054	280.427	0	146.201	355.041	415.799	710.126	158.183	0	195	0	0
CrematogasterSubCLCMeta_c11389	B	PREDICTED: uncharacterized protein LOC105571047	NA	22.2929	-4.34079	1.18704	-3.65681	0.000255377	0.00436318	9	0	0	19	38	11	28	38	6	36	5	0	166	0	0
CrematogasterSubCLCMeta_rep_c1031	B	PREDICTED: apolipophorins	NA	46471	-4.33881	0.857472	-5.06001	4.19241e-07	1.79166e-05	14014.4	1264.53	743.196	4492.17	71025.8	18642	64749.8	93267.6	187737	137635	68179.6	995.3	72478.3	467.715	758.98
CrematogasterSubCLCMeta_rep_c26651	B	NA	NA	18.0897	-4.338	1.10018	-3.943	8.04691e-05	0.00165594	46.3544	0	1.23806	68.0867	16	8.1237	0	23.7175	28.493	21	46.7752	0	28.6268	0	0
CrematogasterSubCLCMeta_s43542	B	PREDICTED: probable trafficking protein particle complex subunit 2	NA	41.0329	-4.33427	1.05412	-4.11173	3.92711e-05	0.000903631	101.046	0	0	21.4077	98.0869	0	93.4601	71.8501	61.0388	36.7799	96.5652	0	54.0744	20.2191	0
CrematogasterSubCLCMeta_c36989	B	PREDICTED: double-stranded RNA-specific editase Adar-like isoform X1	NA	224.329	-4.33216	0.905318	-4.78524	1.70786e-06	6.05168e-05	539.927	0	35.6077	434.982	639.638	37.7052	383.96	136.408	417.585	270.031	426.16	0	233.82	0.154055	43.9628
CrematogasterSubCLCMeta_c37454	B	PREDICTED: nose resistant to fluoxetine protein 6-like	NA	98.9389	-4.33192	1.18477	-3.65634	0.000255841	0.00436799	19.1821	12.3734	16.6331	3377.42	6.70515	0	12.7363	111.067	139.322	1083.12	16.2974	2.81346	17.5938	0	17.7017
CrematogasterSubCLCMeta_s58652	B	NA	NA	6.16202	-4.33173	1.17021	-3.70166	0.000214194	0.00376012	2.29221	2.58511	0	1.82144	8.45316	0	18	19.4075	7.86021	15	5.08264	0	15	0	0
CrematogasterSubCLCMeta_s44141	B	PREDICTED: Krueppel-like factor 3	NA	1109.32	-4.31517	0.750792	-5.74749	9.0578e-09	6.03522e-07	2090.85	0	232.925	972.912	3488.43	129.085	377.746	2029.85	3235.05	2697.68	1268	80.4332	667.877	34.1642	110.423
CrematogasterSubCLCMeta_s44968	B	PREDICTED: transmembrane protein 115	NA	147.165	-4.31355	1.54357	-2.79453	0.00519747	0.0475635	405.815	0	28.4916	113.92	423.181	0	302.342	348.015	234.104	345.206	0	0	0	0	52.5417
CrematogasterSubCLCMeta_rep_c13229	B	NA	NA	5.93916	-4.3101	1.36225	-3.16397	0.00155635	0.0187243	11	0	0	7	0	0	3	7	30	1	30	3	7	0	0
CrematogasterSubCLCMeta_c12922	B	NA	NA	3.0129	-4.3099	1.40102	-3.07625	0.00209619	0.0235678	4	0	0	11	2	1	12	5	0	0	7	0	6	0	0
CrematogasterSubCLCMeta_rep_c23789	B	PREDICTED: 39S ribosomal protein L1, mitochondrial isoform X2	NA	125.479	-4.30871	1.48066	-2.91	0.00361425	0.0359479	90.2248	0	0	122.047	0	0	331.776	113.802	303.217	198.646	557.1	65.4322	292.981	0	0
CrematogasterSubCLCMeta_s36528	B	PREDICTED: sorbitol dehydrogenase-like	NA	329.808	-4.30227	0.999932	-4.30257	1.68832e-05	0.000438625	721.348	18.7998	72.9152	252.247	600.86	0.003554	717.424	387.023	708.893	348.271	202.261	0	1148.87	0	84.5379
CrematogasterSubCLCMeta_c39956	B	PREDICTED: uncharacterized protein LOC105206809, partial	NA	105.504	-4.29562	1.23486	-3.47864	0.000503971	0.00757094	10	0	21.1303	36	101.343	0	7	299.929	853.518	22	21.7651	32.7322	277.252	2.11994	0
CrematogasterSubCLCMeta_c28366	B	PREDICTED: protein msta, isoform A-like	NA	13.4472	-4.29437	1.3609	-3.15555	0.00160198	0.0191721	9.50263	0	0	1.37609	47.8378	0	30.7871	2.56738	15.8012	0	46.5623	6.99165	63.0408	0	0
CrematogasterSubCLCMeta_rep_c5005	B	PREDICTED: uncharacterized protein LOC108746040 isoform X1	NA	101.287	-4.29426	1.06217	-4.04293	5.27865e-05	0.00116322	229.656	0	0	101.51	43.0616	46.8527	134.761	179.512	144.789	278.099	241.86	0	193.502	0	5.0448
CrematogasterSubCLCMeta_s57030	B	PREDICTED: glycosyltransferase-like protein LARGE2	Cyp4s3 [Drosophila melanogaster] Dembeck Cytochrom P450	421.636	-4.29342	0.602181	-7.12979	1.00523e-12	1.429e-10	1067.49	59.1798	13.5493	749.92	553.506	21.1767	255.372	734.611	896.742	1191.22	43.2362	22.5496	804.508	35.0871	59.0021
CrematogasterSubCLCMeta_rep_c22787	B	PREDICTED: uncharacterized protein LOC105208050	NA	281.828	-4.28946	0.876289	-4.89503	9.82929e-07	3.75213e-05	36.7294	0	0	518.406	394.788	49.2836	566.715	616.338	932.829	88.8152	521.61	39.7696	702.024	13.6905	46.4934
CrematogasterSubCLCMeta_rep_c9587	B	PREDICTED: uncharacterized protein K02A2.6	NA	13.1632	-4.28906	1.23462	-3.474	0.000512767	0.00767421	46.7955	0	0	29	20.0381	3	1.97545	20.7901	2.99325	61	0	0	9.12263	0	3.99123
CrematogasterSubCLCMeta_rep_c3751	B	PREDICTED: uncharacterized protein LOC105144108	NA	20.6544	-4.28782	1.17574	-3.6469	0.000265419	0.00450104	41.9783	0	5	37.3307	29.4662	0	3.21354	22.5628	14.3496	0	142.061	6.31219	47.4761	0	0
CrematogasterSubCLCMeta_s43245	B	PREDICTED: probable tRNA (guanine(26)-N(2))-dimethyltransferase	NA	15.1393	-4.27265	1.4212	-3.00638	0.00264381	0.0281836	9.07167	0	0	27.3346	26.569	0	37.0076	0	50.3385	44.571	43.0927	7.73866	0	0	0
CrematogasterSubCLCMeta_c11999	B	PREDICTED: eukaryotic translation initiation factor 4E-binding protein Mextli isoform X3	NA	2.923	-4.27164	1.38804	-3.07746	0.00208774	0.0234966	2	0	0	0	10	0	8	6	4	0	12	0	5	0	1
CrematogasterSubCLCMeta_rep_c32883	B	PREDICTED: serine/threonine-protein phosphatase 2A 55 kDa regulatory subunit B alpha isoform isoform X1	NA	166.474	-4.26476	1.48471	-2.87245	0.00407308	0.039293	436.889	44.1839	0	562.136	449.791	4.5583e-05	2.4118	38.9546	96.1681	0	716.125	0	358.086	33.9066	0
CrematogasterSubCLCMeta_s52444	B	NA	NA	68.3089	-4.26192	0.571395	-7.45879	8.73204e-14	1.47818e-11	148.533	0	9.73397	112.868	84.5361	11.9145	143.684	81.0399	169.51	71.4778	175.066	4.23501	74.36	0	11.293
CrematogasterSubCLCMeta_s44754	B	PREDICTED: uncharacterized protein LOC105565299 isoform X1	NA	32.4067	-4.26166	1.4125	-3.01711	0.00255201	0.0274774	52.7722	0	16.4114	119.133	131.882	0	17.8352	19.3423	0	59.2262	0	2.45044	91.7947	0	0
CrematogasterSubCLCMeta_rep_c29384	B	PREDICTED: uncharacterized protein LOC108771974	NA	5.6979	-4.2602	1.30447	-3.26584	0.00109141	0.014063	0	0	0	21.005	15.6983	0	11	8.53812	8.52192	6.77217	15.3714	1.71321	0	0	1
CrematogasterSubCLCMeta_s52657	B	PREDICTED: uncharacterized protein LOC105202757, partial	NA	238.608	-4.25902	1.24553	-3.41945	0.000627481	0.00904082	975.434	14.8156	55.3515	380.975	569.592	0	548.237	840.795	0	3	133.875	21.183	36.7227	0	39.0385
CrematogasterSubCLCMeta_s56831	B	NADH dehydrogenase subunit 1 (mitochondrion)	NA	820422	-4.25743	0.250478	-16.9972	8.60705e-65	5.89054e-61	1534940	51502.8	106893	1382270	1274050	40389.8	1495540	1228940	1232070	1663410	1025400	85474.6	1659680	71640.7	79398
CrematogasterSubCLCMeta_rep_c39513	B	NA	NA	5.72561	-4.25331	1.38792	-3.06452	0.00218022	0.0242898	0	0	0	10.9973	11.5024	0	25.9813	5.12227	18.8114	1	1.01675	3	13.9403	0	0
CrematogasterSubCLCMeta_rep_c3612	B	PREDICTED: THAP domain-containing protein 4-like	NA	1455.09	-4.24974	0.912233	-4.65861	3.18359e-06	0.000103618	2561	0	512.991	2889.13	3583.15	51.6217	1664.41	2729.04	1791.23	4100.63	622.597	5.50458	1763.2	14.4265	238.978
CrematogasterSubCLCMeta_rep_c27078	B	PREDICTED: serine/threonine-protein kinase mig-15 isoform X9	NA	286.379	-4.24951	1.27498	-3.333	0.000859135	0.0116103	313.54	63.4891	0	584.335	680.258	76.017	691.504	712.395	893.469	189.647	6.9965	0	222.66	0.388924	0
CrematogasterSubCLCMeta_c21679	B	PREDICTED: uncharacterized protein LOC105680060	NA	14.1329	-4.24531	1.18798	-3.57355	0.000352169	0.00565397	54	0	0	28	33	0	23	13	13	20	0	0	29	0	8
CrematogasterSubCLCMeta_s43397	B	PREDICTED: histone-lysine N-methyltransferase SETMAR-like	NA	156.656	-4.24313	0.524819	-8.08495	6.21905e-16	1.49717e-13	261.022	12.4065	24.8105	449.578	327.196	7.40776	235.714	210.167	246.747	168.954	175.151	28.3532	319.739	0	11.5421
CrematogasterSubCLCMeta_s59727	B	PREDICTED: KIF1-binding protein homolog	NA	63.6319	-4.24144	1.17577	-3.60737	0.000309311	0.00508341	41.8766	0	0	1.80898	56.4191	1.61305	96.5875	69.6245	96.8034	91.6479	429.156	0	154.965	31.3137	0
CrematogasterSubCLCMeta_rep_c28392	B	PREDICTED: tubulin beta chain isoform X2	NA	872.144	-4.23823	1.31289	-3.22816	0.00124589	0.0156413	1202.26	0	26.6243	1097.12	2540.37	427.241	3298.67	7.89811	2094.95	1800.5	1520.41	0	5.65202	5.64433	2.60605
CrematogasterSubCLCMeta_s39238	B	PREDICTED: general transcription factor 3C polypeptide 3	NA	52.8368	-4.23757	1.305	-3.24717	0.00116558	0.0148244	95.9423	0	0	79.0556	20.4131	0	78.1751	18.5488	16.1364	0	501.292	10.1017	78.4302	0	19.5836
CrematogasterSubCLCMeta_s54154	B	PREDICTED: multifunctional protein ADE2	NA	418.35	-4.2336	1.09957	-3.85025	0.000117999	0.00228496	1555.9	0	66.0593	531.629	428.294	147.04	775.205	1323.44	100.685	422.012	448.021	14.1445	598.816	0	0
CrematogasterSubCLCMeta_s52949	B	NA	NA	115.472	-4.23337	1.11447	-3.79857	0.000145534	0.00272029	407.35	24.3637	0	123.554	120.444	0	70.7778	338.276	57.1426	191.401	51.9733	34.4333	348.636	0	1.16539e-08
CrematogasterSubCLCMeta_c21353	B	ubiquitin-conjugating enzyme E2 variant 2-like isoform X1	NA	2.84477	-4.23002	1.46962	-2.87831	0.00399806	0.0387096	7	0	0	13	4	0	0	2	1	0	6	0	12	0	1
CrematogasterSubCLCMeta_rep_c5633	B	PREDICTED: uncharacterized protein K02A2.6-like	NA	318.441	-4.22575	0.762264	-5.54368	2.96183e-08	1.68719e-06	214.247	12	48.7225	53.1886	461.479	0	285.935	423.076	524.934	541.375	2425.14	45	270.891	34	34.798
CrematogasterSubCLCMeta_rep_c24601	B	NA	NA	4.00504	-4.22332	1.23615	-3.41652	0.000634277	0.00911227	9	0	0	0	10	0	7	5	12	12	146	2	2	0	0
CrematogasterSubCLCMeta_s59450	B	PREDICTED: uncharacterized protein LOC105831680	NA	80.5148	-4.21175	1.05882	-3.97776	6.95681e-05	0.00146884	260.089	13.8475	10.5277	176.06	128.212	7	79.6401	219.957	8.91629	281.837	3.16512	9.52397	2	0	0
222-PAT-Cr-FB2_PF_(paired)_contig_25592	B	NA	NA	8.78206	-4.20383	1.22088	-3.44327	0.000574728	0.00842806	2.09968	0	0	0	3.09067	1.48949	22.0391	3.54949	25.6312	29.5677	34.9172	0	17.6972	0	3.63658
CrematogasterSubCLCMeta_c34306	B	PREDICTED: cytochrome P450 6k1-like	Cyp9f2 [Drosophila melanogaster] Dembeck Cytochrom P450	6414.79	-4.20216	0.568921	-7.38619	1.51096e-13	2.46209e-11	17572.7	1646.8	282.02	9522.73	10212.4	375.355	6809.88	16638	14276.6	4351.51	4945.13	470.549	12028.7	169.773	289.941
CrematogasterSubCLCMeta_s43218	B	PREDICTED: tubulin beta chain-like isoform X1	NA	12.6196	-4.19513	1.25141	-3.35232	0.000801367	0.0109763	35.7134	0	0	26.1644	5.20959	0	0	46.9103	8.76114	30.9632	14.235	7.29721	16.4276	0	2.47793e-05
CrematogasterSubCLCMeta_s52347	B	NA	NA	15.2713	-4.19458	1.26137	-3.3254	0.000882911	0.0118348	18.1701	1.63378	0	0	43.5311	3.0658	71.5423	42.032	2.72237	0	47.3649	0	9.40996	3.49756	0
CrematogasterSubCLCMeta_rep_c19959	B	PREDICTED: putative ATP-dependent RNA helicase DHX33	NA	218.347	-4.19394	0.771113	-5.43881	5.36379e-08	2.8677e-06	171.6	48.7986	38.7376	207.932	178.415	15.672	288.682	388.139	265.04	336.448	1400	0	259.739	2.1955	7.98997
CrematogasterSubCLCMeta_rep_c25066	B	PREDICTED: puromycin-sensitive aminopeptidase isoform X2	NA	363.73	-4.19157	0.878796	-4.76967	1.84525e-06	6.47623e-05	384.339	0	30.044	99.5486	688.011	67.6366	997.772	549.979	247.015	1414.18	374.096	1.87145	734.494	96.2683	3.48367
CrematogasterSubCLCMeta_rep_c24352	B	PREDICTED: uncharacterized protein LOC105625793	NA	6038.98	-4.18692	1.03371	-4.05038	5.11349e-05	0.00113256	11045.8	428.166	787.925	6151.26	8978.26	10.668	10508	20898.4	10135.4	10269.5	4253.02	0	6916.37	6.58522	2267.56
CrematogasterSubCLCMeta_rep_c30659	B	PREDICTED: zinc finger BED domain-containing protein 4-like	NA	19.9255	-4.17224	1.03536	-4.02976	5.58348e-05	0.00121918	19.7583	8	0	50.894	60.3588	1	36.4289	18.6769	32.3893	43.9562	0	1	39.4236	0	0
CrematogasterSubCLCMeta_s44006	B	PREDICTED: ubiquitin carboxyl-terminal hydrolase isozyme L5	NA	456.945	-4.16439	0.838983	-4.96362	6.91919e-07	2.76924e-05	862.8	0	80.4567	1166.15	716.123	0	652.172	357.179	706.206	613.01	1161.8	22.0956	869.313	133.164	25.4755
CrematogasterSubCLCMeta_rep_c1845	B	PREDICTED: uncharacterized protein LOC105570907 isoform X4	NA	177.091	-4.1577	0.521724	-7.96915	1.59765e-15	3.54345e-13	249.631	6.11413	39.1148	271.753	327.129	9	324.852	201.916	337.465	294.505	264.364	10.4296	457.742	1.11834	39.0929
CrematogasterSubCLCMeta_s58699	B	PREDICTED: uncharacterized protein LOC105143370	NA	19.4784	-4.13914	1.12522	-3.67852	0.000234591	0.00405724	20.5864	0	0	2.47182	46.6688	10.6365	14.3419	41.3115	31.73	33.3192	12.7549	0	94.6022	0	0
CrematogasterSubCLCMeta_rep_c38357	B	PREDICTED: uncharacterized protein LOC105846126	NA	62.2476	-4.13708	0.905355	-4.56956	4.88746e-06	0.000150285	106.707	0	25.344	98.1362	98.9746	0	159.314	63.8482	118.733	124.413	107.972	0	76.5204	0	13.1939
CrematogasterSubCLCMeta_s59976	B	PREDICTED: tubulin beta-4B chain	NA	587.694	-4.13421	0.849014	-4.86943	1.11922e-06	4.1955e-05	1325.12	4.38467	36.5931	731.449	341.815	0.105895	1305.55	1066.38	1197.23	300.6	1574.91	122.346	1254.85	4.57176	187.617
CrematogasterSubCLCMeta_s53424	B	PREDICTED: helicase POLQ-like	NA	5.35395	-4.12625	1.3407	-3.07769	0.00208613	0.0234878	15.1664	1.24508	0	4.45319	20.4932	1.64754	15.1217	12.3036	8.32177	0	0	0	6.36467	0	0
CrematogasterSubCLCMeta_s54885	B	NA	NA	6.64137	-4.12479	1.22178	-3.37605	0.000735341	0.010214	17.0055	0	0	18.3519	15.0218	0	3.75642	12.0301	23.276	0	6.11275	0	5.61795	0	4.38955
CrematogasterSubCLCMeta_rep_c25763	B	UPF0430 protein CG31712-like isoform X2	NA	350.166	-4.11988	1.04588	-3.93917	8.17652e-05	0.00167973	860.914	108.494	25.8132	555.334	1099.16	6.95298	198.041	0	1254.46	493.009	285.208	37.8636	688.897	4.66621	0
CrematogasterSubCLCMeta_s60648	B	PREDICTED: uncharacterized protein LOC107885212	NA	15.3502	-4.1173	0.995843	-4.13449	3.55746e-05	0.000830137	10.2229	0	3.52227	47.9875	24.0991	4.57471	17.0034	5.88079	11.3921	87.9709	8.81637	0	16.1529	0	0
CrematogasterSubCLCMeta_rep_c40032	B	uncharacterized protein LOC109860631	NA	119.413	-4.116	0.693213	-5.93756	2.89297e-09	2.16892e-07	227.693	0	37	271.833	220.044	16.8545	251.614	73.9865	160.908	181	273.972	7	187.588	10.4231	0
CrematogasterSubCLCMeta_s38733	B	NA	NA	36.3597	-4.10835	1.42187	-2.8894	0.00385976	0.0377674	95.6735	17.9484	0	0	9.23007	0	42.3711	19.0123	70.1495	167.635	149.522	0	10.1496	0	0
CrematogasterSubCLCMeta_c11289	B	PREDICTED: DNA-dependent protein kinase catalytic subunit-like	NA	17.3649	-4.09146	1.25934	-3.24889	0.00115856	0.0147733	27	0	0	14	38	0	11	29	23	0	120	0	19	0	11
CrematogasterSubCLCMeta_s43524	B	PREDICTED: tyrosine-protein phosphatase 10D isoform X3	NA	302.783	-4.08934	1.25438	-3.26004	0.00111396	0.0143151	446.329	0	0	827.649	727.259	173.989	243.608	343.452	310.868	364.268	869.92	0	564.663	0	3.04365
CrematogasterSubCLCMeta_s44479	B	uncharacterized protein LOC109860095	NA	45.8045	-4.08273	0.934021	-4.37113	1.23604e-05	0.000334209	52.1125	0	0	75.6531	118.504	21.0197	139.004	37.1249	111.364	58	33.2545	5.73694	77.69	0	0
CrematogasterSubCLCMeta_s57688	B	uncharacterized protein LOC105841774 isoform X1	NA	146.779	-4.08254	1.01796	-4.01051	6.05888e-05	0.0013028	88.2971	0	9.43927	452.988	507.614	0	399.931	61.5965	25.3504	197.916	400.233	0	151.9	37.5225	43.45
CrematogasterSubCLCMeta_rep_c34753	B	PREDICTED: iron-sulfur cluster co-chaperone protein HscB, mitochondrial	NA	11.1429	-4.08213	1.21831	-3.35065	0.000806219	0.0110227	1.36571	0	1.85659	9.54659	0	0	23.1755	3.90228	55.3266	12.072	40.2149	0	34.5954	0	4.90103
CrematogasterSubCLCMeta_c28788	B	tigger transposable element-derived protein 6	NA	23.2158	-4.0793	1.20206	-3.3936	0.000689804	0.00971098	37.461	0	0	15	7	0	32	7	15	0	128.941	12	140	1	1
CrematogasterSubCLCMeta_rep_c26441	B	NA	NA	267.831	-4.07888	0.569653	-7.16029	8.05079e-13	1.16171e-10	882	25	23.0083	319	415	0	493	387	541.026	431	432	31	155.341	35.8563	44.1824
CrematogasterSubCLCMeta_rep_c31205	B	PREDICTED: uncharacterized protein LOC105569971	NA	266.901	-4.07273	1.10673	-3.67998	0.000233254	0.00403848	654.525	2.88189	2.70996	904.562	406.367	12.7165	393.492	410.387	0	38.4038	1286.38	2.17417	68.158	3.7787	146.251
CrematogasterSubCLCMeta_rep_c39341	B	PREDICTED: glucose dehydrogenase	NA	624.986	-4.06836	0.645202	-6.30557	2.87143e-10	2.64541e-08	1239.38	0	62.3374	1723.32	936.254	30.0665	601.04	1576.51	858.344	689.429	590.088	84.2069	1116.21	60.8512	153.424
CrematogasterSubCLCMeta_s54288	B	PREDICTED: 1-phosphatidylinositol 3-phosphate 5-kinase isoform X1	NA	203.055	-4.06753	1.32052	-3.08025	0.00206827	0.0233471	223.431	0	0	270.373	211.862	0	503.417	456.055	545.46	330.132	335.262	0	203.456	117.758	0
CrematogasterSubCLCMeta_c98	B	PREDICTED: galectin-4-like isoform X3	NA	32.4767	-4.0661	1.15554	-3.5188	0.000433497	0.00670592	36.6991	4.38578	0	101.933	28.4221	0	0	52.0599	36.624	74.7919	138.376	0	33.6851	0	15.7353
CrematogasterSubCLCMeta_s60541	B	NA	NA	78.7935	-4.06286	0.985664	-4.12195	3.75676e-05	0.000870286	74.3179	17.1942	0	85.08	138.45	26.9184	120.103	77.4898	176.862	196.453	121.572	0	225.591	0	0
CrematogasterSubCLCMeta_rep_c9079	B	PREDICTED: uncharacterized protein LOC103578557	NA	75.7869	-4.0603	0.811801	-5.00159	5.68599e-07	2.34019e-05	7.63616	7	11	63.9761	116.645	0	73.7914	138	89.073	89.727	432.65	17	199.52	10	0
CrematogasterSubCLCMeta_c14392	B	PREDICTED: sarcolemmal membrane-associated protein	NA	3.55486	-4.05402	1.41345	-2.86818	0.00412843	0.0396582	5	0	0	7	1	0	4	4	2	0	34	2	2	0	0
76-PAR-Cr-FB2_PF_(paired)_contig_24566	B	NA	NA	3.57285	-4.05375	1.34627	-3.0111	0.00260305	0.0278482	0	1	0	0	8.69303	0	2.52664	3	20.2852	4	10.4812	1	8	0	0
CrematogasterSubCLCMeta_s60526	B	PREDICTED: uncharacterized protein LOC108774331	NA	51.0641	-4.0498	0.813331	-4.97928	6.38225e-07	2.58278e-05	128.557	9.80495	9.96896	23.8319	102.721	0	21.7181	90.2724	93.7366	96.9066	171.332	10.4683	56.5208	0	0
CrematogasterSubCLCMeta_rep_c40061	B	PREDICTED: LOW QUALITY PROTEIN: E3 ubiquitin-protein ligase MIB2	NA	30.3857	-4.04871	1.08127	-3.74439	0.000180834	0.00328526	67.909	14.9025	0	36.9572	16.2625	0	6.59465	42.9248	33.325	142.523	93.4719	1.26956	19.337	0	0
CrematogasterSubCLCMeta_rep_c36619	B	PREDICTED: uncharacterized protein LOC105391048	NA	473.955	-4.04485	0.754615	-5.36016	8.31505e-08	4.21088e-06	684.225	115.96	30.0888	915.684	1575.72	2	528.161	728.346	439.317	420.843	1659.98	26.7227	405.597	1.11227	101.26
CrematogasterSubCLCMeta_rep_c11576	B	NA	NA	13.237	-4.03901	1.2378	-3.26305	0.00110219	0.0141866	5	0	0	12	12	8.13905	31	17	36.9789	0	63	0	36	0	0
CrematogasterSubCLCMeta_rep_c28537	B	PREDICTED: alpha-tubulin N-acetyltransferase-like isoform X2	NA	13.1132	-4.03815	1.11931	-3.60771	0.000308908	0.00508027	35.2636	1.61712	5.71879	11.1422	4.96626	0	2.10357	7.59658	19.1442	94	9.45299	0	10.2538	0	0
CrematogasterSubCLCMeta_s60036	B	PREDICTED: matrix metalloproteinase-14 isoform X2	NA	60.4907	-4.03537	0.980679	-4.11488	3.87389e-05	0.000894824	107.631	0	24.17	128.253	110.996	0	46.1012	41.4875	63.5512	241.985	75.194	0	97.7544	14.2817	0
CrematogasterSubCLCMeta_rep_c26764	B	PREDICTED: zinc finger matrin-type protein CG9776-like isoform X1	NA	6.6539	-4.03409	1.27637	-3.16059	0.00157452	0.0189096	3	0	0	4	10	0	0	3.63683	20	12	38	0	17	4	0
CrematogasterSubCLCMeta_rep_c2293	B	PREDICTED: microtubule-associated proteins 1A/1B light chain 3A-like isoform X1	NA	480.024	-4.03192	0.85725	-4.70332	2.55962e-06	8.59313e-05	1563.71	6.66024	0	891.361	763.516	112.933	1344	337.928	1301.05	490.05	590.626	61.9882	24.3051	15.9643	102.728
CrematogasterSubCLCMeta_rep_c4291	B	PREDICTED: Krueppel homolog 2 isoform X1	NA	983.524	-4.03074	0.565813	-7.1238	1.04991e-12	1.48372e-10	3241.02	27.0159	49.7911	1406.92	2638.38	98.5708	1164.75	1003.03	546.496	3349.2	840.522	176.036	439.554	139.538	117.46
CrematogasterSubCLCMeta_s58487	B	PREDICTED: diphthamide biosynthesis protein 1	NA	24.2661	-4.02772	0.937252	-4.29737	1.72835e-05	0.000448539	27.8144	0	4.35212	89.1617	15.3361	10.9337	53.3618	9.63258	36.0147	23.8202	24.318	0	96.4008	0	0
CrematogasterSubCLCMeta_c37871	B	PREDICTED: uncharacterized protein LOC105286914	NA	9.45512	-4.0228	1.26442	-3.18153	0.00146499	0.0178025	0	0	4.39355	18.9395	24.3556	1.48551	1.36769	10.0823	3.00741	57	28	1.16622	1.26728	0	0
CrematogasterSubCLCMeta_rep_c35487	B	PREDICTED: serpin B4-like	NA	862.722	-4.02017	1.13891	-3.52984	0.000415811	0.00648657	1747.24	8.10719	6.68655	760.055	1068.71	477.414	5316.24	221.534	1371.88	1119	850.096	0	781.04	0	37.5244
CrematogasterSubCLCMeta_rep_c33613	B	PREDICTED: ATP-binding cassette sub-family G member 4	NA	2169.76	-4.01959	0.345516	-11.6336	2.78137e-31	3.60128e-28	3725.39	122.407	350.253	1672.13	2885.2	200.448	4379.91	5059.45	6219.26	2455.03	3615.75	279.69	2922.62	149.9	258.221
CrematogasterSubCLCMeta_c18357	B	PREDICTED: uncharacterized protein LOC105448726	NA	2.46681	-4.01752	1.32477	-3.03263	0.00242436	0.0264517	10	0	0	1	5	1	7	2	5	0	8	0	1	0	0
CrematogasterSubCLCMeta_rep_c22353	B	PREDICTED: lipid storage droplets surface-binding protein 2-like	NA	2662.44	-4.0151	0.973072	-4.12621	3.68797e-05	0.000856836	9732.43	48.8496	105.588	4393.11	4953.31	1147.41	2734.56	4945.64	12440.3	28.9804	553.19	130.806	143.423	31.2835	189.175
CrematogasterSubCLCMeta_s26926	B	NA	NA	71.4443	-4.01283	0.696778	-5.75913	8.45489e-09	5.68888e-07	118.986	0	11.7764	123.706	58.3147	25.3331	43.7482	52.4068	172.227	158.273	266.286	3.77176	127.179	1.42089	2.89988
CrematogasterSubCLCMeta_s59690	B	piggyBac transposable element-derived protein 3-like, partial	NA	51.4953	-4.00987	1.31043	-3.05997	0.00221362	0.0245538	50.9608	21.8749	0	0	25.5525	6.10261	20.7472	101.123	35.0583	210.763	42.1989	0	290.365	0	0
CrematogasterSubCLCMeta_s52168	B	NA	NA	37.2096	-4.0046	1.06685	-3.75368	0.000174259	0.00318149	21.3394	0	16.8834	15	105.913	0	180.678	20.0114	117.399	14	99.4562	0	14	7.2806	0
CrematogasterSubCLCMeta_c38582	B	PREDICTED: putative fatty acyl-CoA reductase CG5065 isoform X1	uncharacterized protein Dmel_CG10097, isoform C [Drosophila melanogaster] Dembeck FA reductase	45.1901	-3.99937	1.26731	-3.1558	0.00160057	0.01916	180.921	0	0	167.535	8.28239	27.9573	74.8782	104.341	42.3584	7.14741	25.9262	0	54.62	0	0
CrematogasterSubCLCMeta_s44356	B	PREDICTED: ATP-dependent RNA helicase DHX8	NA	145.577	-3.99497	0.904368	-4.41742	9.9886e-06	0.000278953	229.137	0	35.96	248.938	349.38	0	196.768	129.163	200.585	475.712	249.712	12.1198	129.106	0	50.3434
CrematogasterSubCLCMeta_rep_c29772	B	PREDICTED: uncharacterized protein LOC108687529 isoform X2	NA	578.423	-3.98627	1.04673	-3.80832	0.000139916	0.00263689	784.871	59.8855	53.5836	1831.77	823.658	94.4415	16.488	1252.03	18.5221	2991.15	0	18.6825	615.633	46.5301	88.9882
CrematogasterSubCLCMeta_c17647	B	PREDICTED: 40S ribosomal protein S7	NA	275.208	-3.98317	0.973354	-4.09221	4.27279e-05	0.000973356	782.226	0	0	660.233	705.677	103.559	56.2503	329.37	94.1767	75.8794	702.029	11.9951	851.247	45.0433	12.2027
CrematogasterSubCLCMeta_rep_c27448	B	PREDICTED: pleckstrin homology domain-containing family M member 2	NA	771.229	-3.97919	1.10992	-3.5851	0.000336951	0.00544797	632.904	11.3475	60.3666	628.582	698.996	411.562	1093.13	3584.06	1056.38	293.821	2242.29	3.51437	1322.75	0	0
CrematogasterSubCLCMeta_s52287	B	PREDICTED: uncharacterized protein LOC105566004 isoform X2	NA	16.4055	-3.97741	1.12758	-3.52738	0.000419694	0.00653225	25.3057	0	0	8.2561	18.3249	2.14335	26.6592	60.6907	14.776	0	69.7142	0	28.3916	0	9.29365
CrematogasterSubCLCMeta_s43376	B	NA	NA	46.5365	-3.9755	1.04236	-3.81392	0.000136778	0.00258793	126.616	12.9824	2.2249	70.0864	119.271	0	141.029	92.6331	92.5818	0	3.35931	7.60801	48.5481	0	4.6165
CrematogasterSubCLCMeta_rep_c32885	B	NA	NA	54.1182	-3.97535	1.29447	-3.07104	0.00213317	0.0238659	205.244	25.471	0	157.195	14.3398	0	27.6415	44.8064	103.152	111.106	0	5.02015	145.389	0	0
CrematogasterSubCLCMeta_rep_c9246	B	PREDICTED: LOW QUALITY PROTEIN: putative nuclease HARBI1	NA	65.4501	-3.96874	0.760176	-5.22083	1.78127e-07	8.32541e-06	153.647	8	20	24.3526	80.2584	0	282.24	146.04	10.4627	97.2871	52.3635	6	130.663	3	5
CrematogasterSubCLCMeta_rep_c39305	B	PREDICTED: uncharacterized protein LOC105559263	NA	243.204	-3.95942	0.515175	-7.68559	1.52298e-14	2.85005e-12	276.99	24.8409	0	381.72	357.881	49.1608	486.36	405.217	462.236	398.969	628.072	34.3635	334.237	23.9292	21.2683
CrematogasterSubCLCMeta_rep_c22587	B	PREDICTED: H/ACA ribonucleoprotein complex non-core subunit NAF1	NA	207.596	-3.9563	0.989102	-3.9999	6.33702e-05	0.00135473	284.926	5.74579	66.0991	86.787	41.4953	0	244.578	280	83.1763	82	2243	2.78909	115.607	5.32574	62.142
CrematogasterSubCLCMeta_s43865	B	NA	NA	214.163	-3.95524	1.06392	-3.71761	0.00020112	0.00356986	499.544	0	0	178.752	190.376	118.814	408.26	457.187	402.145	669.835	200.026	0	163.354	12.0317	5.79933
CrematogasterSubCLCMeta_rep_c27483	B	PREDICTED: protein mab-21	NA	94.2062	-3.95523	0.991665	-3.98848	6.64992e-05	0.00141088	211.507	0	10.8067	272.609	285.067	33.6444	226.677	74.4573	170.785	0	121.967	6.90211	77.6934	0	9.59567
CrematogasterSubCLCMeta_rep_c4683	B	PREDICTED: uncharacterized protein LOC105558535	NA	29.2545	-3.95517	0.860364	-4.59709	4.28431e-06	0.000133887	44	5.45346	0	83.1136	50.4409	13.2859	25.8711	41.6172	78.4385	35	62.0752	0	27.3979	0	0
CrematogasterSubCLCMeta_rep_c33836	B	hypothetical protein IscW_ISCW024385, partial	NA	129.377	-3.94903	1.10953	-3.55918	0.000372021	0.00590881	56.1169	0	70.354	188.297	309.219	18.1499	249.662	156.307	307.355	424.253	163.638	0	104.189	0	0
CrematogasterSubCLCMeta_rep_c29904	B	PREDICTED: endoplasmin	NA	3982.16	-3.94866	1.24351	-3.17541	0.00149625	0.0181195	8350.15	0	8.44597	6182	4640	2463.78	8913.67	9305.4	5265.91	3438.13	2341	60.1428	11162.4	0	24.8325
CrematogasterSubCLCMeta_rep_c3866	B	PREDICTED: adenylyltransferase and sulfurtransferase MOCS3	NA	713.144	-3.94858	0.850613	-4.64204	3.44988e-06	0.00011137	821.472	9.39689	0	1165.66	1338.45	221.819	1286.39	1706.46	1743.52	1152.87	803.413	180.59	663.915	43.504	4.01833
CrematogasterSubCLCMeta_c3164	B	PREDICTED: uncharacterized protein K02A2.6-like	NA	77.624	-3.94	1.31691	-2.99186	0.00277283	0.0292981	19	8	0	0	529	0	45	81	263	79.9651	1	0	177	23	19
CrematogasterSubCLCMeta_s43651	B	PREDICTED: cryptochrome-1-like isoform X1	NA	78.0275	-3.93245	0.969142	-4.05767	4.95657e-05	0.00110495	184.224	0	0	232.666	152.059	41.0759	61.3476	68.4951	123.096	232.325	27.5245	6.99035	79.7414	0	2.88446
CrematogasterSubCLCMeta_rep_c440	B	PREDICTED: uncharacterized protein K02A2.6-like	NA	962.166	-3.92655	0.817604	-4.8025	1.56693e-06	5.61458e-05	2243.96	47	51.6612	4667.74	255.885	88.094	1690.45	1732.57	2319.4	1016.84	16.2404	62.8181	198.349	294.962	80.3995
CrematogasterSubCLCMeta_rep_c7163	B	PREDICTED: lysosomal aspartic protease	NA	129.906	-3.91855	1.05283	-3.72191	0.000197724	0.00352395	20	3	24	870	26	12	260	0	377	3	456	16	31	15	18
59-PAR-Cr-FB2_PF_(paired)_contig_11258	B	PREDICTED: uncharacterized protein LOC105451935	NA	55.4616	-3.91773	1.03594	-3.78183	0.000155682	0.00289072	143.431	20.1211	13.9507	52.1723	146.588	0	100.839	34.2546	10.269	146.232	147.009	0	70.4566	0	0
CrematogasterSubCLCMeta_s59528	B	PREDICTED: acetyl-CoA acetyltransferase, mitochondrial	NA	870.948	-3.91719	0.87787	-4.46215	8.11411e-06	0.000233047	2085.04	16.7203	0	949.925	1297.28	455.133	1453.58	2607.33	888.757	923.45	752.472	56.2752	1946.75	22.2216	19.8339
CrematogasterSubCLCMeta_s43734	B	PREDICTED: neuromedin-U receptor 2-like	NA	530.801	-3.91595	0.938323	-4.17335	3.00149e-05	0.00071574	738.233	14.0852	0	1582.86	1157.94	236.674	619.363	890.33	687.612	1071.76	315.338	28.2038	852.036	0	73.9181
CrematogasterSubCLCMeta_rep_c11383	B	PREDICTED: uncharacterized protein LOC108764774	NA	12.0319	-3.91546	1.13437	-3.45166	0.000557152	0.00821583	21.0008	0	0	24.0008	6.00025	2.26766	0	23.0003	15	53.0048	6.00027	6	29	0	0
CrematogasterSubCLCMeta_c20849	B	PREDICTED: uncharacterized protein LOC105675368	NA	13.001	-3.91377	0.984819	-3.9741	7.06463e-05	0.00148833	12.8165	0	5	26	34	0	8	39	14.0021	0	40.5049	1	24	0	3
CrematogasterSubCLCMeta_rep_c22128	B	PREDICTED: uncharacterized protein DDB_G0271670-like	NA	14767.5	-3.91247	0.466331	-8.3899	4.86567e-17	1.39581e-14	46906.9	961.523	2534.74	17153.8	10638.1	700.79	18511.5	44490.6	28753.4	15788.6	27613.2	1962.67	9540.46	1243.44	2586.51
CrematogasterSubCLCMeta_s57462	B	uncharacterized protein LOC109863026	NA	5.81471	-3.91079	1.29724	-3.01471	0.00257229	0.0276116	2.25298	0	4.23084	24.4215	9.52469	0	13.0563	16.7997	2.30704	0	7.9283	0	10.5331	0	0
CrematogasterSubCLCMeta_rep_c31092	B	PREDICTED: uncharacterized protein LOC105619933	NA	115.473	-3.90061	0.937284	-4.16161	3.16017e-05	0.000747995	180.016	0	8.39393	155.265	179.821	58.6744	144.263	224.821	93.4522	84.4586	433.066	0	298.593	0	11.3849
CrematogasterSubCLCMeta_s59502	B	PREDICTED: myotubularin-related protein 6	NA	33.6777	-3.89966	0.885752	-4.40265	1.06937e-05	0.000294596	61.1697	0	0	66.2387	49.3274	0	52.2317	65.2284	63.2529	62.6918	22.9208	3.92996	61.295	0	19.8352
CrematogasterSubCLCMeta_c760	B	PREDICTED: muscle-specific protein 20-like	NA	282.23	-3.8991	1.02747	-3.79487	0.000147723	0.00275475	663.551	0	11.52	483.528	321.295	0	496.248	278.191	421.704	1039.17	192.247	174.103	302.003	1.66685	5.0055
CrematogasterSubCLCMeta_s59720	B	PREDICTED: lysophospholipase-like protein 1	NA	99.1369	-3.89039	1.25667	-3.09579	0.00196288	0.022388	74.333	0	68.1993	4.18519	35.1317	3.36145	80.5205	293.978	349.943	345	138.185	0	155.077	0	0
CrematogasterSubCLCMeta_s58752	B	PREDICTED: uncharacterized protein LOC105449477	NA	4.36551	-3.88975	1.24319	-3.12883	0.00175503	0.0205671	6.82155	0	0	7	2.48515	0	3.73903	3	3.60773	18	22	0	1.07954	0	3
CrematogasterSubCLCMeta_rep_c8463	B	PREDICTED: geranylgeranyl transferase type-2 subunit beta	NA	22.3081	-3.88683	1.26263	-3.07837	0.00208137	0.0234562	88.0094	0	0	5.68082	31.8335	3.0582	0	25.7089	17.1256	51.2661	125.077	0	3.36514	0	13.4808
CrematogasterSubCLCMeta_s43918	B	PREDICTED: PAX3- and PAX7-binding protein 1	NA	275.953	-3.87599	1.17603	-3.29584	0.000981293	0.0129222	616.301	0	47.956	327.883	615.417	0	274.389	270.829	550.367	274.69	935.582	0.000377468	437.386	0	155.9
CrematogasterSubCLCMeta_c33249	B	PREDICTED: piggyBac transposable element-derived protein 4-like	NA	4.32891	-3.87448	1.30225	-2.97522	0.00292776	0.0305628	5	0	0	9	12.3222	0	13	4	1	18	1	0	1	0	3
CrematogasterSubCLCMeta_s53082	B	PREDICTED: uncharacterized protein LOC108768207	NA	24.3162	-3.87194	0.78992	-4.90169	9.50181e-07	3.64163e-05	55.2553	0	0	28.1731	42.0533	7	75.2638	64.1593	35.8465	18	11.1582	2	30.8382	0	8
CrematogasterSubCLCMeta_rep_c37686	B	PREDICTED: uncharacterized protein LOC105448375	NA	3.15653	-3.87128	1.2927	-2.99473	0.00274689	0.0290562	7	0	0	0	6	0	2	10	6	1	5	0	11	0	2
CrematogasterSubCLCMeta_s41617	B	PREDICTED: peptidoglycan-recognition protein SC2-like	NA	260.49	-3.86108	1.12645	-3.42767	0.000608792	0.00883576	1315.83	7.66338e-07	19.0433	0	282.558	35.7448	650.655	96.821	790.867	341.183	262.013	0.00617928	211.827	42.2321	89.1533
CrematogasterSubCLCMeta_s57437	B	PREDICTED: DNA topoisomerase 2-binding protein 1 isoform X2	NA	19.2481	-3.85427	1.058	-3.64299	0.000269487	0.00455391	109.202	0	13.2101	5.29661	31.6851	0	15.7482	17.0996	17.1983	19.6522	12.689	0	61.4354	0	1.20351
CrematogasterSubCLCMeta_rep_c34623	B	NA	NA	5713.83	-3.84928	0.639791	-6.01647	1.78262e-09	1.4046e-07	13517.6	193.821	381.868	5861.87	6311.98	2739.91	5769.82	15636.2	9964.03	9503.72	8145.32	178.929	10298.2	255.767	170.595
CrematogasterSubCLCMeta_rep_c26532	B	PREDICTED: uncharacterized protein LOC108766947	NA	52.8301	-3.83561	1.2292	-3.1204	0.00180605	0.0210005	0	0	3.58549	60.8111	6.49903	0	10.1503	89.7316	66.2122	149.737	357.661	29.1905	98.5924	0	5.3554
CrematogasterSubCLCMeta_c7054	B	PREDICTED: uncharacterized protein LOC105282795 isoform X1	NA	28.1743	-3.83401	0.919829	-4.16817	3.07053e-05	0.000730025	136.616	12	0	50.2555	9.12596	2	20	38.8287	8.59674	94.4645	39.2907	0	16	1	3
CrematogasterSubCLCMeta_rep_c33290	B	PREDICTED: uncharacterized protein LOC105555801	NA	157.737	-3.82564	0.662753	-5.77235	7.81744e-09	5.29717e-07	345.011	38	20.2997	415	351.346	4	183.772	219.238	44.4402	595	113.88	8.61228	44.125	20	15.2216
CrematogasterSubCLCMeta_c30234	B	PREDICTED: uncharacterized protein LOC107982014	NA	39.1339	-3.82435	0.781461	-4.89385	9.88842e-07	3.7627e-05	65.6078	0	18	84.4248	101.075	1	48	10	31	73.1827	151.094	3.49776	47.9807	0	7.40948
CrematogasterSubCLCMeta_rep_c3829	B	PREDICTED: lipid storage droplets surface-binding protein 1 isoform X3	NA	617.492	-3.81953	0.934012	-4.08937	4.32538e-05	0.000984515	2598.3	46.1843	203.173	69.0602	827.195	0	44.2222	1858.71	127.655	1621.11	550.475	91.7363	1282	55.8885	46.6744
CrematogasterSubCLCMeta_s52273	B	PREDICTED: DDB1- and CUL4-associated factor 13	NA	77.0645	-3.81516	1.17478	-3.24754	0.00116406	0.0148197	174.449	0	13.041	71.3938	67.7656	38.3069	226.543	254.572	129.929	154.912	0	3.6691	32.4061	0	0
CrematogasterSubCLCMeta_rep_c39725	B	PREDICTED: D-beta-hydroxybutyrate dehydrogenase, mitochondrial, partial	NA	35.3487	-3.80502	0.919254	-4.13925	3.48446e-05	0.00081469	45.1997	0	0	51.1668	14.6998	13.2297	59.0938	51.9292	90.2089	119.938	45.9191	0	52.0069	0	13.1395
CrematogasterSubCLCMeta_s44412	B	PREDICTED: uncharacterized protein LOC108688790	NA	154.441	-3.80321	1.15042	-3.30594	0.000946593	0.0125272	132.058	0	26.6834	123.326	469.529	83.9577	311.797	103.603	448.715	85.0928	561.649	0	204.526	0	0
CrematogasterSubCLCMeta_rep_c26675	B	PREDICTED: deoxynucleoside kinase-like	NA	46.5799	-3.79056	1.0266	-3.69234	0.000222197	0.00387929	139	0	17.3045	33.3525	5.64431	0	80.9855	43.5887	58.8879	115.69	159.124	0	79.1339	0	19.308
CrematogasterSubCLCMeta_rep_c36971	B	PREDICTED: uncharacterized protein LOC105677028	NA	56.2212	-3.78997	0.636655	-5.95295	2.63353e-09	1.99944e-07	99.0196	6.6853	0	58.0833	87.2616	0	72.8809	61.0885	96.1881	193.742	127.683	15.6168	55.3482	8.12001	8.54585
CrematogasterSubCLCMeta_rep_c15154	B	NA	NA	5.48494	-3.78941	1.21064	-3.13009	0.00174752	0.0205167	9	0	0	0	6	0	10	20	6	18	10	3	1	0	1.20799
76-PAR-Cr-FB2_PF_(paired)_contig_12536	B	PREDICTED: DNA replication complex GINS protein PSF1-like isoform X2	NA	28.2877	-3.78106	1.171	-3.2289	0.00124265	0.0156088	115.035	10.326	2.0037	0	1.8476	0	35.5792	71.0505	94.2661	41.2434	53.509	7.02576	8.18664	0	0
CrematogasterSubCLCMeta_rep_c36414	B	PREDICTED: uncharacterized protein LOC105193868 isoform X1	NA	29.5153	-3.77707	1.31336	-2.87588	0.00402907	0.0389329	15.7884	0	1.34125	0	23.5331	5.14423	130.71	51.392	122.306	63.1812	0	0	34.5621	15.3054	0
CrematogasterSubCLCMeta_s44515	B	NA	NA	149.918	-3.76936	1.34158	-2.80964	0.00495977	0.0459145	0	14.7873	20.2634	125.484	2.32513	2	24.5064	12.5122	13.6886	7280.6	2460.82	9.88383	1.25407	29.3512	33.8024
76-PAR-Cr-FB2_PF_(paired)_contig_9802	B	NA	NA	26.5927	-3.76781	0.880973	-4.27687	1.89541e-05	0.000483768	42.024	0	0	36.7062	15.6975	9.58727	86.4375	41.0476	81.0933	35.3247	45.2575	0	20.097	0	9.94312
CrematogasterSubCLCMeta_s43302	B	PREDICTED: fatty acid synthase-like	NA	334.647	-3.76542	1.29562	-2.90626	0.0036578	0.0362578	788.585	17.1668	44.1135	14.8471	1876.41	8.01554	1.15829	1.08653	1.06981	938.599	521.543	0	998.714	131.609	43.1849
CrematogasterSubCLCMeta_rep_c16009	B	NA	NA	6.70617	-3.76347	1.35581	-2.77581	0.00550651	0.0497362	5	0	0	24	0	0	8	7	5	35	0	4	14	0	1
CrematogasterSubCLCMeta_rep_c22856	B	NA	NA	44.0023	-3.76166	1.20823	-3.11336	0.00184973	0.0213633	204	3.2023	0	3.77153	98.6983	7.14192	21.5891	30.5397	24.4257	0	173.528	21.6059	132	0	0
CrematogasterSubCLCMeta_rep_c6709	B	PREDICTED: aladin-like	NA	75.2298	-3.75863	0.59376	-6.33022	2.44817e-10	2.30422e-08	150.731	21.847	0	132.075	39.1935	6.86813	126.341	107.937	113.015	97	150.49	12.7218	230	5.69215	4.46758
CrematogasterSubCLCMeta_s57595	B	PREDICTED: atrial natriuretic peptide receptor 1-like	NA	9.35343	-3.75657	0.930462	-4.03731	5.40667e-05	0.00118543	29.6347	0	0	2.5	35.3874	0	18.3406	12.7974	10.7867	14	8.5	0	7.28353	2.5	3.65432
CrematogasterSubCLCMeta_s60402	B	PREDICTED: atrial natriuretic peptide receptor 1-like	NA	9.35343	-3.75657	0.930462	-4.03731	5.40667e-05	0.00118543	29.6347	0	0	2.5	35.3874	0	18.3406	12.7974	10.7867	14	8.5	0	7.28353	2.5	3.65432
CrematogasterSubCLCMeta_s43593	B	NA	NA	6.84883	-3.75269	1.32386	-2.83466	0.00458742	0.0431174	21.2504	0	0	17.6502	31.224	4.71668	12.9052	1.89872	5.38969	9.75691	0	0	2.37234	0	0
CrematogasterSubCLCMeta_rep_c36572	B	PREDICTED: 60S ribosomal protein L18a	NA	231.034	-3.74984	0.840778	-4.45997	8.19727e-06	0.000234872	550.998	47.9848	16.367	41.0965	571.746	39.6494	651.022	35.9162	611.198	816.486	140.523	23.4817	54.2365	0	38.8637
CrematogasterSubCLCMeta_rep_c36699	B	PREDICTED: uncharacterized protein LOC107265982	NA	461.475	-3.74941	0.492284	-7.61636	2.60924e-14	4.61258e-12	885.042	82.7364	125.534	987.184	1412.05	11.0999	798.145	628.166	666.03	593.621	371.175	51.6664	571.884	32.9148	30.6124
CrematogasterSubCLCMeta_s56046	B	NA	NA	5.3278	-3.74441	1.11329	-3.36336	0.000770001	0.0106184	7	0	1	10	1	2	11	15	16	0	15	0	6	0	1
CrematogasterSubCLCMeta_s43333	B	PREDICTED: uncharacterized aarF domain-containing protein kinase 1	NA	222.134	-3.7427	0.799938	-4.67873	2.88651e-06	9.54342e-05	391.247	27.0319	75.2102	684.766	322.672	0	240.537	471.397	294.229	483.946	173.311	0	200.524	27.405	38.3911
CrematogasterSubCLCMeta_rep_c6636	B	PREDICTED: zinc transporter 7-A	NA	480.319	-3.74097	0.366559	-10.2057	1.87064e-24	1.26221e-21	1086.14	70.9849	23.8155	607.75	794.578	77.9962	897.472	883.903	676.988	428.288	981.886	38.609	917.113	36.3952	104.839
CrematogasterSubCLCMeta_c33764	B	NA	NA	14.9348	-3.73822	1.29967	-2.87628	0.00402398	0.0389091	49.8243	0	0	31.3669	18.1958	11.2237	0	41.8263	48.475	16.2003	6.58175	0	5.98567	0	0
CrematogasterSubCLCMeta_c32579	B	PREDICTED: signal transducer and activator of transcription 5B	NA	1115.04	-3.73607	0.746969	-5.00164	5.68453e-07	2.34019e-05	1366.38	169.903	42.9248	1340.82	2137.53	183.817	2017	1521.58	1754.76	2676.72	2842.75	0	1308.56	360.329	34.8368
CrematogasterSubCLCMeta_s52572	B	NA	NA	14.3649	-3.73352	1.29023	-2.89368	0.00380753	0.037348	17	0	1	30	0	5.52918	10	59	5.03092	0	9	0	81.8361	0	4
CrematogasterSubCLCMeta_s56140	B	NA	NA	73.0193	-3.73081	0.675406	-5.5238	3.31747e-08	1.86319e-06	153.421	13	14.8354	248.836	89.5364	4	126.592	109.059	94.8947	168.767	58.7409	0	24.4287	18.0567	3.03593
CrematogasterSubCLCMeta_rep_c36306	B	PREDICTED: protein yellow-like	NA	1069.05	-3.72903	0.870437	-4.28409	1.83487e-05	0.000471836	2274.13	96.2418	79.4424	1129.58	1176.72	468.637	1787.01	1566.75	2197.28	4531.91	93.2217	49.1957	865.167	0	99.2665
CrematogasterSubCLCMeta_s44657	B	PREDICTED: LOW QUALITY PROTEIN: geminin	NA	43.56	-3.72624	0.820663	-4.54052	5.6115e-06	0.000169609	125.161	0	15.3838	98.0705	33.5957	11.3318	54.5042	33.2447	32.7363	53.3742	47.8309	0	183.432	0	8.10983
CrematogasterSubCLCMeta_rep_c22416	B	PREDICTED: uncharacterized protein LOC105556865	NA	358.089	-3.72329	0.806034	-4.61927	3.85085e-06	0.000122174	272.208	1	29.7746	1011.98	1023.14	202.291	196.443	458.573	246.114	845.394	821.834	16	550.177	16.3438	4
CrematogasterSubCLCMeta_c4441	B	PREDICTED: uncharacterized protein LOC105561639	NA	128.568	-3.72277	1.02423	-3.63471	0.000278296	0.00467146	276.257	19.7101	73.8898	220.668	256	0	326	112.746	30.2849	124.263	492.286	0	152.929	0	4.22868
CrematogasterSubCLCMeta_c13004	B	PREDICTED: uncharacterized protein LOC105203970, partial	NA	5.90398	-3.71873	1.27814	-2.90949	0.00362024	0.0359748	10	4	0	14	5	0	12	4	3	9	0	0	32	0	0
CrematogasterSubCLCMeta_rep_c35827	B	NA	NA	227.933	-3.71641	0.974621	-3.81318	0.000137191	0.00259266	167.594	74.4462	0	227.122	334.326	39.982	306.073	745.004	897.257	9.78753	381.138	0	363.934	7.32707	40.2609
59-PAR-Cr-FB2_PF_(paired)_contig_14746	B	PREDICTED: uncharacterized protein LOC105449477	NA	22.3514	-3.71592	0.861363	-4.314	1.60329e-05	0.000419033	31	9	0	25	69	0	17	31	23	87	11	1	36	0	6
CrematogasterSubCLCMeta_s44823	B	PREDICTED: LOW QUALITY PROTEIN: E3 ubiquitin-protein ligase Su(dx)	NA	78.0882	-3.70015	1.28961	-2.86919	0.00411526	0.0395883	345.678	0	0	55.6363	94.2382	58.5301	126.374	18.4348	58.1055	206.854	195.802	0	84.4703	0	0
CrematogasterSubCLCMeta_c15003	B	PREDICTED: putative uncharacterized protein FLJ37770	NA	11.8687	-3.6967	1.07615	-3.43512	0.000592282	0.00864284	5	0	0	25	29	9	3	10	14	29	51	0	19	0	0
CrematogasterSubCLCMeta_rep_c33018	B	PREDICTED: RNA-binding protein 45 isoform X1	NA	1157.9	-3.69341	0.611388	-6.04102	1.53145e-09	1.22279e-07	2076.86	93.5495	76.8414	2337.84	1017.4	453.461	1934.12	2834.75	2594.15	1900	411.424	18.587	1908.11	55.2745	187.365
CrematogasterSubCLCMeta_rep_c18927	B	NA	NA	2.81435	-3.68851	1.30703	-2.82206	0.0047717	0.0445089	5	0	0	6	7	0	2	12	2	0	2	2	5	0	0
CrematogasterSubCLCMeta_rep_c7387	B	PREDICTED: uncharacterized protein LOC105457794	NA	171.487	-3.6866	1.10755	-3.3286	0.000872837	0.0117392	0	8.88718	32.0168	97.3968	799	20.5256	264.946	645.708	223.078	0	542.869	14.6528	13.2927	44.7306	10.0104
CrematogasterSubCLCMeta_rep_c26751	B	NA	NA	8.27513	-3.68354	1.08753	-3.38707	0.000706425	0.00989843	7.7545	3.90425	0	10.0545	34.8565	0	7	7.23357	6.43146	0	47.0926	1.06092	11.9046	0	1.28409
CrematogasterSubCLCMeta_rep_c29739	B	PREDICTED: DNA polymerase III PolC-type-like	NA	35.5464	-3.67066	1.01359	-3.62145	0.00029296	0.00486308	113.11	9.38043	14	120.016	103.865	3	1	50.9473	3	14.6883	71.878	0	55	0	1.33876
CrematogasterSubCLCMeta_s26802	B	PREDICTED: maternal protein tudor-like	NA	40.4443	-3.66982	1.15324	-3.18218	0.00146172	0.0177733	23.6661	0	0	26.1115	97.2022	0	39.4123	53.4586	66.0721	50.734	123.425	31.8076	150.867	0	0
CrematogasterSubCLCMeta_rep_c39825	B	PREDICTED: uncharacterized protein LOC105566859	NA	90.9175	-3.66535	0.884918	-4.14202	3.44261e-05	0.000806086	67.9644	12.3413	24.9587	39.727	177.852	0	151.452	126.891	262.934	158.488	435.081	18.3132	0	8.62525	6.72832
CrematogasterSubCLCMeta_s60107	B	DEAD-box helicase Dbp80-like	NA	598.541	-3.66217	0.749359	-4.88707	1.0235e-06	3.88533e-05	1659.89	44.2603	100.172	558.263	1779.45	0	1119.01	623.636	1629.81	1085.58	375.626	130.058	95.9063	87.5585	113.556
CrematogasterSubCLCMeta_s54197	B	PREDICTED: uncharacterized protein LOC108684226 isoform X4	NA	42.5475	-3.65662	1.0828	-3.37701	0.000732783	0.0101932	40.6892	12.3333	0	68.9168	65.9118	0	118.916	57.8859	107.177	1.25329	114.632	0	82.0153	0	20.8294
CrematogasterSubCLCMeta_s52855	B	PREDICTED: protein DENND6A isoform X2	NA	218.698	-3.65249	0.796747	-4.58426	4.55595e-06	0.000141178	219.929	14.9901	90.0185	300.068	335.345	0.000280485	521.671	216.88	434.889	156.752	665.305	35.6129	549.542	0	38.1156
CrematogasterSubCLCMeta_c33758	B	PREDICTED: uncharacterized protein LOC105566755 isoform X1	NA	155.853	-3.65228	1.22396	-2.98398	0.00284523	0.029932	453.408	71.1072	0	325.568	398.686	37.8085	258.551	49.7969	36.6875	506.265	61.8406	0	215.138	0	0
CrematogasterSubCLCMeta_rep_c35408	B	uncharacterized protein Dsimw501_GD19374, isoform N	NA	26.8091	-3.65067	0.818351	-4.46101	8.15746e-06	0.000233872	59	0	14	34	80.463	0	41.9433	16	39.9929	75	33.5712	7	23	0	1
CrematogasterSubCLCMeta_s44877	B	PREDICTED: neuroglian isoform X2	NA	46.4471	-3.64715	1.08367	-3.36554	0.000763933	0.0105408	198.474	2.27884	28.6316	69.8413	101.836	0	24.7782	74.5102	9.0123	0	142.735	2.07035	84.4471	5.47662	0
CrematogasterSubCLCMeta_s57107	B	PREDICTED: DNA topoisomerase I, mitochondrial isoform X1	NA	677.534	-3.64668	0.408403	-8.92912	4.29408e-19	1.70014e-16	1203.21	57.0093	135.176	1214.48	608.88	113.163	714.21	798.39	1126.53	1305.4	2462.67	67.691	977.836	133.039	25.7587
CrematogasterSubCLCMeta_c23422	B	PREDICTED: uncharacterized protein LOC108724527	NA	239.834	-3.63991	0.590479	-6.16433	7.07819e-10	5.99107e-08	753.827	16.2875	56.5481	301	697.058	45.1346	400.964	285.552	638.221	317	133.839	41.2886	38.4611	10.0444	24.0517
CrematogasterSubCLCMeta_rep_c38109	B	PREDICTED: cytochrome P450 9e2-like	Cyp9f2 [Drosophila melanogaster] Dembeck Cytochrom P450	11550.2	-3.63876	0.610788	-5.95749	2.56144e-09	1.94779e-07	25554.8	923.514	1346.56	16510.7	15918.4	4851.89	11224.7	41678.8	24343.7	15654.6	4712.31	308.298	11179.2	885.366	770.737
CrematogasterSubCLCMeta_s26822	B	PREDICTED: sensory neuron membrane protein 1-like isoform X1	NA	198.753	-3.63864	1.18835	-3.06192	0.00219926	0.0244398	284.906	56.8388	0	374.678	0	8.97727	0	164.233	247.963	1045.42	145.585	23.8393	682.11	31.4131	27.5511
CrematogasterSubCLCMeta_c7103	B	NA	NA	120.393	-3.63656	0.778167	-4.67324	2.96491e-06	9.76891e-05	154.659	4	8	314.505	99.5938	0	94.333	226.932	102.862	590.228	29	17	121.176	40	28
CrematogasterSubCLCMeta_rep_c26771	B	PREDICTED: putative nuclease HARBI1, partial	NA	36.944	-3.63455	0.808605	-4.49485	6.96203e-06	0.000204494	77.2245	12.6651	0	24.1711	78.7133	0	62.1857	91.5744	72.5102	17.6049	102.064	8.15469	30.7046	0	6.82778
CrematogasterSubCLCMeta_rep_c34162	B	PREDICTED: uncharacterized protein LOC105556682	NA	2744.56	-3.62178	0.832727	-4.3493	1.36572e-05	0.000365721	6361.17	258.156	125.13	7880.8	4517.43	1612.51	4980.6	3926.82	2804.78	6967.21	2186.35	15.1542	596.588	112.009	23.7801
CrematogasterSubCLCMeta_rep_c8249	B	PREDICTED: cytochrome P450 6k1-like isoform X1	NA	67.6592	-3.61974	0.759063	-4.7687	1.85416e-06	6.50273e-05	155	7	22	158	86.0951	4	52	142.097	193.292	8	52	2	165	19	0
CrematogasterSubCLCMeta_rep_c28798	B	NA	NA	9.76294	-3.61845	1.20023	-3.0148	0.00257152	0.0276116	2	0	0	12	34	5	11	2	7	68	1	0	6	0	3
CrematogasterSubCLCMeta_s44378	B	PREDICTED: ankyrin-3-like, partial	NA	32.5053	-3.61775	0.737216	-4.90732	9.23316e-07	3.54718e-05	86.3684	4.55668	2.02315	28.4114	60.4488	0	68.267	21.5096	26.29	122.604	22.045	0	46.463	9	10
CrematogasterSubCLCMeta_rep_c38116	B	PREDICTED: uncharacterized protein LOC108747896	NA	120.709	-3.61344	0.658214	-5.48976	4.02471e-08	2.21114e-06	335.647	8.58232	29.1063	311.025	218.902	3.58509	201.175	260.552	164.633	180.772	5.53539	27.7918	71.1293	12.7946	15.9438
CrematogasterSubCLCMeta_s59793	B	PREDICTED: integrin alpha-8-like	NA	17.1747	-3.61284	1.14867	-3.14525	0.00165947	0.0196929	31.7646	12.3019	0	37.1808	1.15366	0	26.7109	18.66	26.0233	65.1777	22	0	25.0695	0	0
CrematogasterSubCLCMeta_rep_c3577	B	PREDICTED: uncharacterized protein LOC105455077 isoform X2	NA	122.998	-3.60986	1.27317	-2.83534	0.00457773	0.0430601	47.7355	0	32	132	0	67.02	38.652	85.3826	145.499	213	1205.05	1	158.927	1	0
59-PAR-Cr-FB2_PF_(paired)_contig_31400	B	PREDICTED: uncharacterized protein LOC105395811	NA	4.93664	-3.60446	1.03343	-3.48788	0.000486867	0.00737412	9	0	0	13	5	1	12	3	1	19	5	0	6	2	1
CrematogasterSubCLCMeta_rep_c33829	B	PREDICTED: LOW QUALITY PROTEIN: tissue inhibitor of metalloproteases	NA	440.797	-3.60136	1.11967	-3.21646	0.00129784	0.0161495	291.357	11.4642	169.568	387.28	0	158.788	355.363	1586.71	171.194	759.918	1103.64	7.71207	1926.78	18.2136	0.407683
CrematogasterSubCLCMeta_s52246	B	PREDICTED: ubiquinone biosynthesis monooxygenase COQ6 isoform X2	NA	258.034	-3.59369	0.827642	-4.34209	1.41135e-05	0.000375581	378.839	12.9992	0	473.089	313.778	117.916	375.831	535.8	372.745	394.4	473.098	23.3985	545.15	0	59.1602
CrematogasterSubCLCMeta_s53244	B	PREDICTED: beta-1,3-galactosyltransferase 5	NA	152.329	-3.59358	1.28416	-2.79839	0.00513581	0.0470999	90.3838	1.21219e-05	0	171.347	262.224	1.77858	242.386	547.128	214.732	110.278	662.666	61.7736	0	59.6219	0
CrematogasterSubCLCMeta_s55936	B	NA	NA	8.40998	-3.59121	1.03652	-3.4647	0.000530824	0.00789022	17	0	1	1	3	2.50802	11.8431	4.58774	9.9379	1	51.691	2	34.6069	0	1.15433
CrematogasterSubCLCMeta_s59863	B	PREDICTED: uncharacterized protein B0303.7 isoform X2	NA	207.334	-3.59094	1.02131	-3.51603	0.000438056	0.0067544	368.643	0	0	218.823	359.04	0	168.045	470.536	361.238	475.458	156.133	120.526	479.967	39.1016	11.7353
CrematogasterSubCLCMeta_rep_c11017	B	PREDICTED: uncharacterized protein LOC105663914	NA	81.6401	-3.59005	1.09284	-3.28507	0.00101956	0.0132909	365	10	8	21	559.378	20	29.6964	0	228.703	1	12.4752	5	17.7933	13	10
CrematogasterSubCLCMeta_rep_c22978	B	PREDICTED: uncharacterized protein LOC108767291	NA	16.0955	-3.5841	1.0303	-3.47871	0.000503831	0.00757094	16	0	1	75	44	0	17	32	10	21	6	0	14	12	0
CrematogasterSubCLCMeta_c38857	B	PREDICTED: protein Skeletor, isoforms B/C isoform X2	NA	5.96663	-3.58341	1.1824	-3.03062	0.00244055	0.0265786	14.7967	0	0	23.6584	3	0	22	4.53751	2.60176	0	11.094	4	6.93001	0	1
CrematogasterSubCLCMeta_rep_c38595	B	PREDICTED: putative fatty acyl-CoA reductase CG5065	NA	201.665	-3.58148	1.04488	-3.42765	0.000608822	0.00883576	305.329	7	0	1004.22	244.735	0	235.097	307.673	236.295	422.139	16	144.463	160.785	9	8
CrematogasterSubCLCMeta_c12029	B	PREDICTED: ribokinase	NA	7.09846	-3.57995	1.12109	-3.19328	0.00140669	0.0172346	7	0	0	2	4	0	3	7	11	1	72	3	11	1	2
CrematogasterSubCLCMeta_s43807	B	PREDICTED: uncharacterized protein LOC105450202	NA	121.563	-3.57778	1.02611	-3.48673	0.000488974	0.00740368	615.589	0	41.5393	103.371	102.301	17.9793	206.561	68.66	311.425	146.995	19.2996	0	235.302	0	47.0358
CrematogasterSubCLCMeta_rep_c6670	B	PREDICTED: succinate--hydroxymethylglutarate CoA-transferase	NA	126.017	-3.57616	0.75089	-4.76256	1.91155e-06	6.66011e-05	239.306	37.1131	0	223.106	236.082	28.0188	198.393	211.025	189.97	183	194	3.645	210.702	0	31.3476
CrematogasterSubCLCMeta_rep_c23611	B	PREDICTED: protein GDAP2 homolog isoform X1	NA	405.231	-3.57076	1.06933	-3.33924	0.000840079	0.0114176	1534.47	47.7054	25.2037	24.7171	41.4499	136.562	77.7825	19.8841	1537.88	36.728	1789.23	7.40155e-08	1403.98	71.3461	48.7986
CrematogasterSubCLCMeta_rep_c3188	B	PREDICTED: cytochrome c1, heme protein, mitochondrial	NA	1123.21	-3.57052	0.449183	-7.94892	1.88147e-15	4.04196e-13	2187.94	55.6482	279.256	883.018	1919.07	279.976	2220.56	1058.36	2174.96	3002.7	932.084	88.5197	2433.1	157.034	81.4754
CrematogasterSubCLCMeta_rep_c9634	B	PREDICTED: general odorant-binding protein 56d-like	NA	266.752	-3.56963	1.16474	-3.06475	0.00217849	0.0242769	524	31.608	0	1228.03	393	179.425	239	280.738	477	220	63	3.33825	532	0	0
CrematogasterSubCLCMeta_rep_c26922	B	PREDICTED: dentin sialophosphoprotein-like	NA	72.2937	-3.56646	1.14582	-3.11258	0.00185461	0.0214041	64.8952	36.2413	3.36732	3.36785	137.969	0	146.979	0	145.065	234.222	195.643	12.6647	193.215	2.2678	0
CrematogasterSubCLCMeta_rep_c22082	B	PREDICTED: uncharacterized protein LOC105147561 isoform X1	NA	742.835	-3.56297	0.465076	-7.66104	1.84427e-14	3.38519e-12	1127.23	79.6621	47.7462	705.883	1509.7	269.953	1244.36	879.262	1211.9	1054	2649.1	30.7263	1063.69	55.1622	131.696
CrematogasterSubCLCMeta_c11563	B	uncharacterized protein LOC105683011	NA	5.93842	-3.56237	1.22337	-2.91193	0.00359202	0.0357984	0	0	0	11	10	0	4	8	7	29	8	5	11	0	0
CrematogasterSubCLCMeta_rep_c22630	B	PREDICTED: chromosomal protein D1-like isoform X1	NA	1325.14	-3.5604	0.335608	-10.6088	2.71207e-26	2.12996e-23	2258.41	114.368	178.78	1817.15	2213.34	416.8	2508.85	2186.59	2276.26	2026.12	2077.08	84.3678	2514.26	144.952	167.406
CrematogasterSubCLCMeta_s57699	B	NA	NA	12.7447	-3.5604	1.06625	-3.33919	0.000840235	0.0114176	0	0	2.77017	25.5182	19.897	0	8.53183	16.499	16.4897	77.039	19	6	4.31196	0	2.14791
CrematogasterSubCLCMeta_s54645	B	PREDICTED: uncharacterized protein LOC105556418	NA	5.66549	-3.5595	1.20293	-2.95903	0.00308608	0.0318151	9.2073	0	0	24	8	0	11	4.21672	15.9772	0	6.9558	0	7	0	5
CrematogasterSubCLCMeta_s44578	B	PREDICTED: uncharacterized protein LOC107066544 isoform X1	NA	17.8834	-3.5537	1.14867	-3.09376	0.00197639	0.0225167	53.7472	0	0	69.5927	6.87021	0	0.92057	6.72678	6.013	49	56.1474	0	19.5215	1.66335	13.5467
CrematogasterSubCLCMeta_c38227	B	NA	NA	6.95544	-3.55341	1.10059	-3.22865	0.00124374	0.0156184	14	1	0	9.01979	18.5151	0	19.6463	8	12.1751	0	22.261	0	3	0	5.21596
CrematogasterSubCLCMeta_c15643	B	PREDICTED: sodium- and chloride-dependent glycine transporter 1-like	NA	7.50737	-3.54504	1.0708	-3.31066	0.000930779	0.0123623	24	4	0	22	5	0	12	7	15	0	19	0	10	0	2
CrematogasterSubCLCMeta_rep_c20710	B	Serpentine Receptor, class T	NA	10.8299	-3.54358	1.08918	-3.25345	0.00114014	0.0145772	26.3319	0	0	0	17.7047	4.39502	41.1578	11.6932	12.0763	32.1998	7	0	11.8391	5.37049	0
CrematogasterSubCLCMeta_s54319	B	PREDICTED: solute carrier family 41 member 1-like isoform X1	NA	382.143	-3.54057	0.792225	-4.46915	7.85325e-06	0.000226474	110.222	29.4212	144.021	1647.18	662.449	59.9352	547.594	251.885	1114.13	868.614	116.788	25.5371	368.535	0	75.0626
CrematogasterSubCLCMeta_rep_c9465	B	PREDICTED: putative fatty acyl-CoA reductase CG5065	NA	39.105	-3.5323	0.934469	-3.78001	0.000156821	0.00290632	95	5	24	60	70	0	30	67.0365	56.0747	127	1	4	62.1726	0	1
CrematogasterSubCLCMeta_rep_c37671	B	PREDICTED: uncharacterized protein LOC108772193	NA	2256.68	-3.53185	0.766544	-4.6075	4.07534e-06	0.000128025	500.508	271.01	355.938	1301.03	10677.6	116.443	776	987.069	1625.76	1957.47	676.74	210.642	16455.7	490.286	480.762
CrematogasterSubCLCMeta_c37201	B	PREDICTED: uncharacterized protein LOC108722821	NA	251.593	-3.52995	0.771262	-4.57686	4.72016e-06	0.000145514	456.349	9.50461	1.92119	313.647	511.78	44.7293	418.455	774.381	622.555	444.131	60.2786	32.8463	28.0669	12.0672	120.868
CrematogasterSubCLCMeta_s60042	B	zinc finger MYM-type protein 1-like	NA	1148.28	-3.52281	0.54331	-6.48397	8.93373e-11	9.18429e-09	2492.37	161.527	105.697	1789.76	1230.03	12.2079	2626.98	1327.69	3493.73	1376.46	993.675	182.39	1881.15	112.015	423.495
CrematogasterSubCLCMeta_s43199	B	PREDICTED: LOW QUALITY PROTEIN: uncharacterized protein LOC108760269	NA	613.002	-3.51991	0.783546	-4.49228	7.04647e-06	0.000206499	1152	69.1252	83.3592	2778.09	1759.18	39.2372	2664.11	99.047	87.7813	209.505	147.297	130.229	216.894	124.176	79.1178
CrematogasterSubCLCMeta_s54130	B	PREDICTED: uncharacterized protein LOC108731478	NA	106.111	-3.51823	0.944724	-3.72408	0.000196028	0.00350283	114.175	2.87634	55.6165	11.082	175.923	0	507.578	23.4034	143.556	264.323	163.237	19.8781	214.389	0	16.86
CrematogasterSubCLCMeta_s54244	B	PREDICTED: putative fatty acyl-CoA reductase CG5065	uncharacterized protein Dmel_CG13091, isoform A [Drosophila melanogaster] Dembeck FA reductase	219.356	-3.51804	0.98653	-3.56608	0.000362367	0.00578856	286.883	48.3385	41.7595	244.922	386.016	0	616.312	183.848	652.353	196.655	407.526	93.8684	381.015	0	0
CrematogasterSubCLCMeta_c11738	B	uncharacterized protein LOC111054846	NA	10.4773	-3.51025	1.03582	-3.38887	0.00070181	0.00984528	11	0	0	22	25	7	3	6	10	1	67	1	23	1	0
CrematogasterSubCLCMeta_c3987	B	PREDICTED: uncharacterized protein LOC105206112	NA	103.832	-3.50998	0.738499	-4.75285	2.00569e-06	6.93266e-05	267	14	57	131	189	14	81	85	107	268	340	2	109	0	4
CrematogasterSubCLCMeta_rep_c7483	B	PREDICTED: S-adenosylmethionine mitochondrial carrier protein-like	NA	75.8136	-3.50874	0.488769	-7.17874	7.03565e-13	1.02449e-10	101	5.17661	18.0571	100.792	90.581	16.8831	118.228	80	150.438	62	310.778	1.40036	167	15.3011	9.9352
CrematogasterSubCLCMeta_s60162	B	PREDICTED: uncharacterized protein LOC105391048	NA	93.9615	-3.50824	1.23809	-2.83359	0.00460285	0.0432455	112.753	0	74.2775	1.81141	181.521	2	17.0652	109.924	35.0658	106.625	894.859	0	69.1094	0	11.202
CrematogasterSubCLCMeta_rep_c22388	B	PREDICTED: tetraspanin-7-like	NA	2243.7	-3.50748	0.956961	-3.66523	0.000247119	0.0042448	4996.75	927.701	631.328	3091.93	4433.82	154.022	2546.53	5024.46	3945.62	2346.76	1833.75	2.03666	4930.6	0.0122854	99.3075
CrematogasterSubCLCMeta_s43746	B	PREDICTED: protein BCL9 homolog isoform X2	NA	594.999	-3.50259	0.987056	-3.54852	0.000387404	0.00609903	836.292	0	11.69	363.635	1139.05	335.326	1340.69	603.402	1229.28	1240.5	1425.3	0.000806636	870.657	144.273	20.9761
CrematogasterSubCLCMeta_rep_c21095	B	NA	NA	25.6517	-3.50134	0.921093	-3.80129	0.000143943	0.00269792	11.8973	0	0	21.4587	42.545	15.7827	65.9452	38.215	37.994	29.0712	71.9235	0	75.2369	5.7809	0
CrematogasterSubCLCMeta_s52212	B	PREDICTED: uncharacterized protein LOC105568703	NA	88.4564	-3.49633	1.12964	-3.09508	0.0019676	0.0224272	154.448	0	0	0	137.788	0	202.157	176.976	102.547	191.716	184.743	7.68132	171.845	45.9666	24.1811
CrematogasterSubCLCMeta_rep_c23893	B	PREDICTED: ubiquitin-conjugating enzyme E2 J2	NA	334.895	-3.4939	0.687138	-5.08472	3.68178e-07	1.59623e-05	245.555	0	87.536	690.352	615.072	73.167	590.605	405.219	250.118	687.526	596.378	19.3797	969.949	103.047	13.1193
CrematogasterSubCLCMeta_rep_c30470	B	PREDICTED: uncharacterized protein LOC105564436	NA	6.85406	-3.49309	1.10145	-3.17135	0.0015173	0.0183184	30	0	0	5	17	2	5	3	8	26	1	4	5	0	0
CrematogasterSubCLCMeta_rep_c28266	B	NA	NA	4.6304	-3.49016	1.07001	-3.26181	0.00110705	0.0142415	11.744	0	0	9	7	2	9.00728	5.30025	8	10	0	0	7.90083	2.02277	0
CrematogasterSubCLCMeta_c24874	B	PREDICTED: TBC1 domain family member 15-like	NA	356.201	-3.48966	0.490653	-7.11227	1.14147e-12	1.60365e-10	503.792	37.0428	68.268	386.375	281.278	31.1135	599.145	520.333	550.811	432.976	1576.5	122.217	659.238	43.3941	9.73227
CrematogasterSubCLCMeta_s60552	B	NA	NA	10.1796	-3.48474	1.20845	-2.88364	0.00393103	0.0381995	14	6.99998	0	25	0	0	10.3391	9.9126	13.9539	57.5351	13.7145	0	3.10865	0	1.31241
CrematogasterSubCLCMeta_rep_c40022	B	PREDICTED: microsomal triglyceride transfer protein large subunit isoform X2	NA	2876.57	-3.4826	0.785626	-4.4329	9.29729e-06	0.000262776	6587.59	122.989	70.9906	5003.6	7470.53	1934.88	3487.42	5264.24	2122.32	7332.38	922.059	42.7977	3616.39	254.974	66.0636
CrematogasterSubCLCMeta_s44061	B	PREDICTED: NADH-ubiquinone oxidoreductase 75 kDa subunit, mitochondrial isoform X2	NA	923.859	-3.48193	0.817709	-4.25815	2.06125e-05	0.000519455	1742.11	272.524	5.70625	1820.7	2824.81	88.6678	27.1948	655.175	3087.76	2408	120.25	139.617	1015.72	148.225	113.194
CrematogasterSubCLCMeta_c39539	B	PREDICTED: uncharacterized protein LOC105206417, partial	NA	6.72674	-3.47822	1.19785	-2.90373	0.00368747	0.0364765	0	0	0	14	13	0	3	12	9	9	20	6	23	0	0
CrematogasterSubCLCMeta_s43648	B	PREDICTED: gamma-tubulin complex component 6	NA	239.632	-3.47476	0.931329	-3.73097	0.000190744	0.0034276	611.728	0	65.549	372.549	764.446	0	576.997	618.334	266.871	62.7258	169.68	27.566	50.6328	26.1531	105.04
CrematogasterSubCLCMeta_s59892	B	PREDICTED: uncharacterized protein DDB_G0283697-like	NA	771.649	-3.46861	0.852381	-4.06932	4.71515e-05	0.00105952	2401.36	68.4003	139.507	200.97	729.562	162.993	1474.42	1446.04	526.347	1283.21	2446.51	4.90624	1086.26	2.06666e-06	332.737
CrematogasterSubCLCMeta_rep_c30508	B	NA	NA	198.1	-3.4676	0.812861	-4.26592	1.99078e-05	0.00050355	206.533	9.53774	11.2808	392.507	185.417	8.26615	182.576	307.9	256.238	978.989	315.227	0	64.7026	35.3039	120.252
CrematogasterSubCLCMeta_s52304	B	NA	NA	5.66629	-3.46492	1.09616	-3.16097	0.00157242	0.0188892	15	0	1	10.1508	12.6998	0	10.8194	10.8187	4.81628	0	4	0	15.0111	3.59548	0
CrematogasterSubCLCMeta_rep_c22530	B	PREDICTED: uncharacterized protein KIAA2013 homolog isoform X1	NA	205.037	-3.46019	0.699666	-4.94549	7.59527e-07	2.99973e-05	414.223	6.10505	41.6146	98.1874	657.727	0	330.286	228.993	330.43	239.969	553.767	15.742	273.489	24.8178	103.899
CrematogasterSubCLCMeta_s43305	B	PREDICTED: bridging integrator 3-like	NA	14.15	-3.45921	1.0412	-3.32233	0.000892679	0.0119357	52.6161	0	1	41.2469	13.5759	0	22	30.4642	21.5435	12.1496	0	9.16714	10	0	3
CrematogasterSubCLCMeta_rep_c6786	B	NA	NA	24.6154	-3.45878	0.765323	-4.51937	6.20229e-06	0.00018456	40	10	0	10	18	1	47	49.8874	17	81	41	4	59	0	6
CrematogasterSubCLCMeta_s59758	B	PREDICTED: rho guanine nucleotide exchange factor 17 isoform X2	NA	337.861	-3.45497	0.836677	-4.1294	3.63711e-05	0.000847486	244.146	0	78.868	267.628	264.869	0	451.269	434.608	896.022	671.99	744.263	79.0065	1183.58	60.047	98.4714
222-PAT-Cr-FB2_PF_(paired)_contig_42941	B	NA	NA	4.41834	-3.45403	1.20429	-2.86811	0.00412934	0.0396582	12	1	0	0	2	0	3.66799	3	15	18	7	0	5	0	3
CrematogasterSubCLCMeta_s44025	B	PREDICTED: uncharacterized protein LOC105677028	NA	58.6336	-3.45326	0.811694	-4.25439	2.09623e-05	0.000526331	72.6801	0	0	71.4311	160.778	17.0672	64.0454	101.015	108.883	48.8977	127.374	12.3627	132.963	22.7175	0
CrematogasterSubCLCMeta_s52680	B	NA	NA	24.6468	-3.44827	1.03335	-3.33698	0.000846953	0.0114878	67.3593	6	0	22.0454	31.8773	0	36.0775	19.1453	25.05	0	159.058	7.13743	30.7343	0	8.50088
CrematogasterSubCLCMeta_rep_c4156	B	PREDICTED: protein RRP5 homolog	NA	187.8	-3.44821	0.692516	-4.97925	6.38322e-07	2.58278e-05	167.784	22.8464	10.8839	294.167	231.224	90.5396	391.589	116.595	376.78	56.9476	311.458	27.7892	957.542	1.7952	11.2858
CrematogasterSubCLCMeta_rep_c39489	B	NA	NA	22.4156	-3.44674	0.739902	-4.65838	3.18714e-06	0.000103618	25	5	1	6.62957	64.6928	4	23.0183	7	21.3556	72	54.0999	0	68.695	2	8.01186
CrematogasterSubCLCMeta_rep_c39985	B	PREDICTED: probable cytochrome P450 6a14	Cyp9f2 [Drosophila melanogaster] Dembeck Cytochrom P450	4556.21	-3.44611	0.996104	-3.45959	0.000541005	0.0080291	2223.52	1240.51	0	9065.89	2106.81	477.785	16321.8	3347.44	2002.21	11422.5	96.5469	566.19	21411	1117.39	482.185
CrematogasterSubCLCMeta_rep_c30647	B	PREDICTED: uncharacterized protein LOC105564436	NA	8.46296	-3.44441	1.1326	-3.04117	0.00235663	0.0258464	41	0	0	7	26	1	10	11	13	0	1	1	16	0	6
CrematogasterSubCLCMeta_rep_c37348	B	PREDICTED: ribosome-releasing factor 2, mitochondrial	NA	944.812	-3.44293	0.44685	-7.7049	1.30948e-14	2.46982e-12	1418.4	92.0364	195.576	2559.81	1216.42	130.124	1836.94	870.243	331.355	3267.69	1509.88	158.598	939.17	126.843	155.829
CrematogasterSubCLCMeta_s52604	B	PREDICTED: uncharacterized protein LOC106792604	NA	332.001	-3.44052	1.2209	-2.81802	0.00483207	0.0449583	1172.67	13.5419	152.741	604.329	271.835	18.2817	493	721.99	0	0	659.057	0	1018.03	87.6869	34.5875
CrematogasterSubCLCMeta_s59889	B	PREDICTED: uncharacterized protein LOC108776387	NA	137.348	-3.43803	1.01488	-3.38763	0.000704984	0.00988691	220.047	43.5237	0	371.678	253.297	19.0557	233.251	119.471	208.916	449.741	24.8101	0	125.733	0	57.8491
CrematogasterSubCLCMeta_c15988	B	PREDICTED: glucose dehydrogenase	NA	453.221	-3.43578	1.02666	-3.34656	0.000818205	0.0111643	306.112	63.7934	20.4565	2002.97	213.846	32.8846	102.636	348.091	189.276	3152.38	131.897	69.6183	0	171.151	42.2316
CrematogasterSubCLCMeta_rep_c36096	B	NA	NA	91.3695	-3.43151	0.66223	-5.18175	2.19813e-07	1.00505e-05	242.645	24.3191	1	103.064	201.49	4.67925	407.944	89.7654	54.7281	141.709	39.3237	18.4111	62.6035	16.8726	15.4925
CrematogasterSubCLCMeta_rep_c36973	B	PREDICTED: uncharacterized protein LOC105566980	NA	69.4895	-3.43096	0.830957	-4.12892	3.64464e-05	0.000848827	79.6576	0	19.0995	187.553	157.401	0	125.108	93.8965	98.1134	83.5355	53.9964	19.8412	153.511	0	27.7175
CrematogasterSubCLCMeta_rep_c24886	B	PREDICTED: uncharacterized protein LOC105567893	NA	12.1129	-3.42093	1.21609	-2.81305	0.00490737	0.045535	20.2744	0	0	44.8916	17.2749	10.9004	16.9372	0	14.527	17.166	39.8091	0	15.485	0	0
CrematogasterSubCLCMeta_s44518	B	PREDICTED: uncharacterized protein LOC108727460	NA	18.461	-3.41222	1.07824	-3.16463	0.00155281	0.018691	36.8259	0	0.25906	28.9574	57.8027	10.6809	21.533	0	39.394	20.7715	53.2565	6.19638	26.4584	0	0
CrematogasterSubCLCMeta_rep_c27867	B	PREDICTED: ankyrin repeat family A protein 2	NA	72.108	-3.40797	1.2272	-2.77704	0.00548568	0.0495573	30.0319	0	51.5364	353.152	241.705	0	115.83	47.6286	54.5178	0	34.1593	0	205.152	12.6825	5.33789
CrematogasterSubCLCMeta_rep_c5817	B	PREDICTED: uncharacterized protein LOC108777273	NA	110.472	-3.4066	0.795473	-4.28248	1.84818e-05	0.000474495	284.029	45.2077	5.79593	96.0993	91.319	13.1619	411.729	125.931	222.357	115	7	13.9174	284.045	0	18.177
CrematogasterSubCLCMeta_s52310	B	PREDICTED: COP9 signalosome complex subunit 6	NA	177.089	-3.40387	1.04421	-3.25976	0.00111505	0.0143229	180.822	4.07748	0	75.0112	152.191	151.325	147.365	283.574	482.915	441.846	541.504	0	384.508	4.43109	3.21062
CrematogasterSubCLCMeta_s44837	B	PREDICTED: eukaryotic peptide chain release factor subunit 1 isoform X1	NA	340.05	-3.39957	0.912907	-3.72389	0.000196174	0.00350414	403.815	12.2833	31.7674	580.85	264.369	167.537	614.949	417.997	423.17	371.775	1575.53	104.193	608.39	0	0
CrematogasterSubCLCMeta_rep_c28739	B	PREDICTED: histamine H2 receptor-like	NA	22.8231	-3.39797	1.08588	-3.12924	0.0017526	0.0205487	29.8251	2.86272	0	26.3138	48.9374	0	48.2373	25.1455	95.6688	5.14221	0	2.94619	65.2435	0	15.894
CrematogasterSubCLCMeta_s43365	B	PREDICTED: WD repeat-containing protein 44	NA	493.406	-3.39489	0.520774	-6.51893	7.08092e-11	7.45551e-09	769.867	26.7827	4.45074	776.228	912.128	161.407	684.295	645.439	754.408	814.592	1365.24	109.85	736.378	86.226	71.2153
CrematogasterSubCLCMeta_rep_c24488	B	PREDICTED: podocan-like	NA	311.902	-3.39354	0.792	-4.28478	1.82921e-05	0.000470886	1104.05	109.618	18.2396	110.563	446.393	2	538.258	1207.95	492.469	94	45.4891	27.3593	407.882	52.6443	66.4907
CrematogasterSubCLCMeta_s43295	B	PREDICTED: serine/threonine-protein phosphatase alpha-2 isoform	NA	1225.4	-3.38945	1.1883	-2.85234	0.00433982	0.0411291	2129.11	121.483	55.9392	1938.1	3344.9	871.978	3292.91	1984.18	0	2193.28	3239.45	23.0769	105.212	0	51.3025
CrematogasterSubCLCMeta_rep_c36670	B	PREDICTED: acyl-CoA Delta(11) desaturase-like	desaturase 1, isoform E [Drosophila melanogaster]	1781.43	-3.38471	0.721933	-4.6884	2.75344e-06	9.16035e-05	1890.09	315.112	174.042	9982.78	2521.63	154.168	2622.78	2703.8	2656.25	2155.22	22.8458	225.71	1268.23	488.721	277.266
CrematogasterSubCLCMeta_rep_c6467	B	NA	NA	84.2115	-3.38274	0.937375	-3.60874	0.00030769	0.00506547	172	2	0	50	97	21	126	332	196	113	0	27	113	5	26
CrematogasterSubCLCMeta_rep_c6244	B	PREDICTED: protein-tyrosine sulfotransferase	NA	79.9591	-3.38139	0.924726	-3.65664	0.000255541	0.00436442	140	0	13.8752	46.2009	173.209	0	200.569	45.3388	251	57.291	165.354	51.0977	147.947	0	12.9337
CrematogasterSubCLCMeta_s43573	B	NA	NA	44.774	-3.3812	0.932168	-3.62725	0.000286461	0.00478338	176.281	0	0	123.167	117.178	12.662	44.8416	8.80271	92.1959	24.7236	42.8683	7.32172	38.965	0	24.2524
CrematogasterSubCLCMeta_s25439	B	PREDICTED: myosin heavy chain, muscle isoform X20	NA	7490.41	-3.37824	0.49054	-6.88677	5.70723e-12	7.36972e-10	9439.86	709.895	444.262	13815.6	6810.11	2627.72	12485.4	14916.3	14486	22338.8	3570.42	904.065	10936.1	1518.21	758.692
CrematogasterSubCLCMeta_rep_c11647	B	PREDICTED: NADPH--cytochrome P450 reductase isoform X1	NA	99.4125	-3.37297	0.937079	-3.59945	0.000318886	0.00521039	144	22.2476	0	169.023	79	50.9662	319.647	86.0197	322	98	169	0	114.942	15.6766	0
CrematogasterSubCLCMeta_rep_c25782	B	PREDICTED: DNA topoisomerase 2-binding protein 1-like	Cyp9f2 [Drosophila melanogaster] Dembeck Cytochrom P450	1411.23	-3.37215	0.845926	-3.98635	6.70983e-05	0.00142234	3310.4	109.977	0	1787.48	1504.23	450.032	2117.69	1985.8	3540.22	1082.76	2179.85	682.167	3698.54	19.107	65.5742
CrematogasterSubCLCMeta_rep_c5006	B	PREDICTED: membrane-associated progesterone receptor component 1	NA	6437.18	-3.37209	0.636777	-5.29556	1.18655e-07	5.81822e-06	2454.23	297.288	759.94	18058.9	15199.8	149.953	9940.39	9502.92	4900.51	17955.8	5891.43	683.08	10671.5	641.622	3880.7
CrematogasterSubCLCMeta_s57689	B	PREDICTED: D-beta-hydroxybutyrate dehydrogenase, mitochondrial	NA	44.8767	-3.36135	0.793277	-4.2373	2.26226e-05	0.000562126	113.233	10.3118	0	93.8953	76.7121	14.5364	141.576	10.5245	43.1548	22.1055	33.7545	4.01551	139.893	0	12.9977
CrematogasterSubCLCMeta_s52325	B	PREDICTED: spermine synthase isoform X1	NA	96.9582	-3.3543	1.18445	-2.83196	0.00462634	0.0434491	253.16	0	0	188.183	34.9827	16.8733	187.209	121.377	364.055	0	191.495	63.2564	125.121	0	14.9891
CrematogasterSubCLCMeta_s59443	B	PREDICTED: bifunctional heparan sulfate N-deacetylase/N-sulfotransferase	NA	98.1109	-3.35312	0.80202	-4.18084	2.90439e-05	0.000695355	90.6796	11.1577	27.0966	135.036	41.8508	48.2362	203.573	150.43	213.225	169.736	377.043	0	112.871	7.11028	0
CrematogasterSubCLCMeta_rep_c32655	B	PREDICTED: polyadenylate-binding protein 4-like	NA	3956.65	-3.34925	1.10851	-3.0214	0.00251611	0.0272098	7562.72	7.05085	41.6271	3450.7	21.8078	1846.69	8668.08	8944	6691.38	7641	4292.92	8.40776	10839.8	7.12689	2049.56
CrematogasterSubCLCMeta_rep_c35002	B	PREDICTED: protein-S-isoprenylcysteine O-methyltransferase	NA	13.6665	-3.34546	1.06817	-3.13197	0.00173638	0.0204112	0	0	4.1487	22.4725	28.5907	0	38.3541	3.46315	13.8538	61.5367	21.1401	1.31981	15.2031	0	9.46097
CrematogasterSubCLCMeta_rep_c36659	B	NA	NA	8.0353	-3.34147	1.18397	-2.82227	0.00476848	0.0444876	17.1155	5.5172	0	27.7072	22	0	4.15312	0	3.93406	27	5.71265	0	9.81121	0	1.21302
CrematogasterSubCLCMeta_rep_c39900	B	uncharacterized protein LOC100643019 isoform X1	NA	25.6818	-3.34052	0.946633	-3.52884	0.000417378	0.00650677	53.9344	0	0	7.64895	52.5374	6.966	52.4858	24.2983	35.9497	25	74.0255	17.8127	66.7457	0	0
CrematogasterSubCLCMeta_rep_c4335	B	PREDICTED: sepiapterin reductase	NA	251.916	-3.33986	0.626496	-5.33102	9.76618e-08	4.85845e-06	496.776	35.8074	47.8276	35.2833	358.749	65.9743	580.294	157.987	660.039	35.2382	853.05	21.2927	748.249	31.2936	40.105
CrematogasterSubCLCMeta_rep_c38056	B	PREDICTED: uncharacterized protein LOC105563185	NA	72.9521	-3.3368	0.626157	-5.32901	9.87476e-08	4.90228e-06	122.399	27.7693	19.5663	145.175	167.89	1.90336	144.136	124.692	58.2872	104.749	71.54	6.60462	133.996	0	10.9357
CrematogasterSubCLCMeta_rep_c39619	B	PREDICTED: uncharacterized protein LOC105205239	NA	22.0331	-3.33002	1.0983	-3.03196	0.00242969	0.0264845	0	2.09284	3.71335	18.0152	77.8617	0	63.362	16.46	56.1144	0	47.4755	9.12601	62.9395	0	7.0197
CrematogasterSubCLCMeta_c21727	B	NA	NA	32.3687	-3.32954	0.743404	-4.47878	7.50724e-06	0.000218185	21.4589	0	0	41.1437	34.2592	14.5408	24.3665	45.9985	37.8284	98.8182	122.282	8.25632	65.5342	1.21347	7.89944
CrematogasterSubCLCMeta_rep_c14006	B	PREDICTED: rapamycin-insensitive companion of mTOR-like	NA	8.87625	-3.32923	1.14863	-2.89844	0.00375029	0.0369681	12	0	0	0	17.9286	3	14	15	2.22373	17.6242	51.9996	0	6	0	6
CrematogasterSubCLCMeta_rep_c36394	B	trichohyalin-like	NA	353.262	-3.32536	0.563179	-5.90463	3.53437e-09	2.58901e-07	555.833	34.2449	55.8439	667.993	262.87	123.219	1483.02	643.355	178.172	781.464	470.837	56	101.773	34.0954	40.9177
CrematogasterSubCLCMeta_rep_c35988	B	PREDICTED: ejaculatory bulb-specific protein 3-like	NA	62.031	-3.32505	1.16452	-2.85529	0.00429974	0.0408462	31.0208	18	22.3766	354.707	76.8699	9.19586	176.139	169.315	12.7617	0	0	5.32906	67.3674	0	5.14462
CrematogasterSubCLCMeta_rep_c38600	B	PREDICTED: uncharacterized protein LOC105461244, partial	NA	10.0962	-3.32443	1.19771	-2.77566	0.00550899	0.0497397	0	0	0	24.0572	47.149	7.12989	3.31939	2.2472	19.0428	7	19.7022	0	33.9038	0	3.49373
CrematogasterSubCLCMeta_s26815	B	NA	NA	141.408	-3.32003	0.679491	-4.88606	1.02875e-06	3.90217e-05	87.6716	56.0873	9.56034	236	170.514	1.14618e-06	244.885	265.798	228.557	115.813	485.54	42.7306	314.338	11.9696	9.28853
CrematogasterSubCLCMeta_s57759	B	NA	NA	15.2712	-3.31764	1.00792	-3.29157	0.000996281	0.0130657	26.4228	0	0	33.2673	15.048	0	12.5255	11.145	20.0403	26	85.9053	0	6.96088	0.902371	15.0107
CrematogasterSubCLCMeta_rep_c22721	B	PREDICTED: peroxisomal multifunctional enzyme type 2	NA	13092.3	-3.31578	0.442181	-7.49869	6.44579e-14	1.11079e-11	26554.2	3040.84	2819.58	26360.9	22521.3	3432.15	22703.9	22314.7	18288.6	27214.5	6767.5	910.774	17739	1177.65	1113.5
CrematogasterSubCLCMeta_c40050	B	PREDICTED: uncharacterized protein LOC105839381 isoform X1	NA	1053.46	-3.31523	1.04984	-3.15783	0.00158946	0.0190366	3053.3	0	0	1288.32	1062.43	29.9133	1934.27	2386.96	2060.18	1556.57	503.054	611.639	1409.77	363.253	31.6327
CrematogasterSubCLCMeta_rep_c25022	B	PREDICTED: transient receptor potential cation channel subfamily V member 4	NA	23.5421	-3.31522	1.14558	-2.89392	0.00380462	0.0373424	45.8614	3.35242	0	3.19875e-06	28.1797	0	54.332	73.228	25.7492	1	2278.83	0	95.8669	11.392	9.21426
CrematogasterSubCLCMeta_rep_c38601	B	NA	NA	8.86499	-3.3118	1.02034	-3.24579	0.00117127	0.0148681	10	0	4	24	43.5469	0	14	8	7.2361	0	7	4	18.8112	0	1
CrematogasterSubCLCMeta_rep_c36482	B	PREDICTED: dimethyladenosine transferase 1, mitochondrial	NA	449.775	-3.30681	1.14432	-2.88975	0.00385547	0.0377486	142.031	0	86.0517	243.913	1.87627	292.323	1051.65	711.625	1209.59	906.795	2376.48	27.1608	305.699	41.0837	0.226799
CrematogasterSubCLCMeta_rep_c4788	B	PREDICTED: probable actin-related protein 2/3 complex subunit 2	NA	297.372	-3.30621	0.491691	-6.72416	1.76604e-11	2.08903e-09	465.197	37.4303	14.0617	432.157	470.102	126.541	573.521	389	445	122.198	876.743	36.9706	759.428	46.7704	25.8808
CrematogasterSubCLCMeta_s54222	B	PREDICTED: WASH complex subunit FAM21 isoform X1	NA	706.561	-3.29418	0.37497	-8.78518	1.56107e-18	5.70889e-16	1158.63	40.4418	170.274	1127.76	1188.27	202.361	962.425	1024.49	1159.55	1063.54	1482.32	176.562	1400.68	37.2612	88.3039
CrematogasterSubCLCMeta_rep_c34210	B	PREDICTED: uncharacterized protein LOC105556398 isoform X2	NA	79.3697	-3.28344	1.11144	-2.95423	0.00313447	0.0322031	159.902	0	22	6.63404	182.464	39	262.689	165.831	142.697	0	262.785	0	13	11	8.83587
CrematogasterSubCLCMeta_rep_c7571	B	PREDICTED: uncharacterized protein LOC105846126	NA	23.3429	-3.28335	0.722202	-4.54629	5.45985e-06	0.000166073	74.2353	12	4.75402	13.8368	46.2485	0	34.441	51.9958	21.6464	34.6733	14	3	46.6049	1	1
CrematogasterSubCLCMeta_rep_c35043	B	PREDICTED: rho guanine nucleotide exchange factor 17-like	NA	51.6012	-3.28322	0.697006	-4.71046	2.47157e-06	8.32668e-05	98.1678	6.09171	11.0714	32.0513	123.333	27.2057	137.608	86.1902	121.008	51.0367	28.4461	0	83.9261	6.11666	1.28509
CrematogasterSubCLCMeta_s43359	B	PREDICTED: N-acetyltransferase ESCO2 isoform X1	NA	360.669	-3.28242	0.668305	-4.91156	9.03558e-07	3.49368e-05	890.136	72.0638	18.5583	888.654	464.094	41.4718	539.853	465.22	831.341	416.371	354.306	0	466.202	129.508	90.9427
CrematogasterSubCLCMeta_c23839	B	PREDICTED: proliferation-associated protein 2G4	NA	506.829	-3.28031	0.915038	-3.58489	0.000337222	0.00545051	1828.13	179.691	57.0704	946.244	740.323	111.522	730.512	596.31	1054.31	0	28.9719	43.9677	1557.43	32.8543	55.9184
CrematogasterSubCLCMeta_c15571	B	PREDICTED: golgin-84-like isoform X1	NA	18.8617	-3.27785	0.806543	-4.06408	4.82226e-05	0.00107903	17	6	0	37	54	10	36	24	21	60	8	1	17	1	0
CrematogasterSubCLCMeta_s43645	B	PREDICTED: glycoprotein-N-acetylgalactosamine 3-beta-galactosyltransferase 1-like	NA	187.85	-3.27779	0.727954	-4.50274	6.70821e-06	0.000197888	392.071	33.6471	0	282.485	492.572	40.8893	380.214	273.846	121.964	262.809	198.75	0.684577	363.442	48.8623	60.6674
CrematogasterSubCLCMeta_s54259	B	PREDICTED: uncharacterized protein LOC108723020 isoform X1	NA	3159.64	-3.27617	0.822537	-3.98301	6.80492e-05	0.00144122	5969.56	74.2153	49.6507	3858.64	5977.96	2688.85	5530.53	6587.1	7274.69	2503.41	6358.44	31.2219	2815.64	221.286	79.6688
CrematogasterSubCLCMeta_rep_c2864	B	PREDICTED: m7GpppN-mRNA hydrolase isoform X1	NA	155.507	-3.27101	1.09139	-2.9971	0.00272559	0.0288947	104.733	48.4796	0	0	35.5465	20.4109	174.329	138.08	250.667	8.68941	853.686	51.5348	922.945	19.8539	8.90156
CrematogasterSubCLCMeta_rep_c7546	B	NA	NA	17.4795	-3.26912	0.667441	-4.89799	9.68232e-07	3.69897e-05	59.1186	1.54177	10.2107	29	40.0086	0	15.8794	14.5725	24.7128	20.004	25.0017	4.03853	30.9538	0	1.55136
CrematogasterSubCLCMeta_c36761	B	PREDICTED: acetyl-CoA carboxylase isoform X3	NA	79.0584	-3.2678	1.1223	-2.9117	0.00359463	0.0358153	142.338	6	11	1	8	3.07266	135.365	5	4	154.28	544.486	56	267.935	0	5
76-PAR-Cr-FB2_PF_(paired)_contig_13413	B	PREDICTED: uncharacterized protein LOC105454255	NA	39.215	-3.26645	0.895382	-3.64811	0.000264178	0.0044851	68.268	17.1788	20.3118	67.1835	86.8373	1.42038	84	61.6605	54.3499	16	65.0419	0	81.5969	0	0
CrematogasterSubCLCMeta_c32361	B	PREDICTED: uncharacterized protein LOC105563235	NA	23.7465	-3.26336	1.00234	-3.25574	0.00113096	0.014483	69.0443	0	17.2024	36.2152	61.8104	8.18558	50.0329	16.4797	54.0862	10	6	0	49.7744	0	0
CrematogasterSubCLCMeta_rep_c2459	B	PREDICTED: acetyl-coenzyme A synthetase	NA	6839.78	-3.26049	0.496985	-6.56055	5.36113e-11	5.77159e-09	7550.17	959.697	1652.07	13001	14438.7	2880.57	10430.9	12328.7	13616.3	14283.8	5302.61	380.196	9021.18	287.773	757.21
CrematogasterSubCLCMeta_s53003	B	NA	NA	53.0727	-3.25805	1.16612	-2.79394	0.00520708	0.0476183	100.617	0	0	66.3539	188.896	49.08	96.4556	111.888	140.69	6.14367	52.4901	0	18.3008	0	5.13683
CrematogasterSubCLCMeta_c32564	B	PREDICTED: uncharacterized protein LOC105561273	NA	573.007	-3.25782	1.0167	-3.2043	0.00135391	0.0166997	1049.14	0	99.5638	1756.52	966.539	310.948	1463.44	920.118	579.193	0	1513.73	33.653	303.719	75.0517	71.7154
CrematogasterSubCLCMeta_s52718	B	PREDICTED: islet cell autoantigen 1 isoform X1	NA	219.949	-3.25752	1.10854	-2.93856	0.00329739	0.0334891	158.092	0	6.63799	0	642.613	5.37476	475.424	494.99	643.265	589.433	196.158	52.3155	6.16122	68.7571	99.1623
CrematogasterSubCLCMeta_rep_c4084	B	PREDICTED: programmed cell death protein 2 isoform X1	NA	246.224	-3.25739	0.610264	-5.33766	9.41523e-08	4.70339e-06	396.848	9.78885	37.3553	401.658	372.318	97.2521	334.432	379.519	390.884	527	392.376	0	441.813	51.1562	59.0632
CrematogasterSubCLCMeta_rep_c39487	B	uncharacterized protein LOC105688816	NA	63.5472	-3.25591	0.701804	-4.63935	3.49507e-06	0.000112753	195	18.6472	15.2796	113	122.448	0	104	51.8435	42.7715	83.6187	58	13.2745	169.214	0	17.4097
CrematogasterSubCLCMeta_s56966	B	PREDICTED: uncharacterized protein LOC105839381 isoform X2	NA	2028.95	-3.25559	0.977387	-3.33091	0.000865632	0.0116652	4078.83	11.5706	5.42408	2327.39	2363.48	4.86426	4462.93	5405.6	2759.34	3540.66	1095.25	1659.6	3175.61	384.499	23.4987
CrematogasterSubCLCMeta_rep_c39891	B	PREDICTED: receptor-type tyrosine-protein phosphatase F-like	NA	119.493	-3.25195	0.783175	-4.15227	3.29196e-05	0.000774978	151.679	0	17.6537	18.0097	656.071	37.1343	243.762	221.424	115.041	94.475	37.2555	16.3101	222.103	40.8882	10.5217
CrematogasterSubCLCMeta_rep_c33839	B	PREDICTED: uncharacterized protein LOC105840106	NA	21.1155	-3.25176	0.774207	-4.20011	2.6678e-05	0.000644835	36.3156	9	6	30	65	0	15	39	21	19	20	0	67	0	6.25761
CrematogasterSubCLCMeta_rep_c12626	B	PREDICTED: uncharacterized protein LOC105557089	NA	120.209	-3.24915	0.860242	-3.77702	0.000158715	0.002938	4	34.8807	2.75517	322.939	19.3186	12.0862	19.5591	187.21	194.089	353	493.528	13.8953	223.834	48	3.50258
CrematogasterSubCLCMeta_rep_c35419	B	PREDICTED: uncharacterized protein LOC106062674	NA	27.6845	-3.24529	0.819736	-3.95895	7.52806e-05	0.00157145	89.5834	8.49065	1.22279	16.6051	101.025	4	14.3028	23.6521	61.4404	1.04544	66.5055	5.18641	44.5208	0	9.60705
CrematogasterSubCLCMeta_rep_c37805	B	PREDICTED: hemolymph lipopolysaccharide-binding protein-like	NA	237.513	-3.24512	1.15707	-2.80459	0.005038	0.0465219	32.3619	15.8786	48.0982	24.6057	118.481	6.70663	6932.31	26.3506	27.2944	36.9139	3799.28	108.865	20.7359	2.40805	69.5807
CrematogasterSubCLCMeta_rep_c37726	B	PREDICTED: uncharacterized protein LOC105180986	NA	237.113	-3.23907	0.63119	-5.13169	2.87152e-07	1.28446e-05	372.103	20.5113	22.7166	616.097	308.605	9.00555	501.719	319.928	272.893	658.553	189.148	15.5212	199.726	156.061	14.1767
CrematogasterSubCLCMeta_s43694	B	PREDICTED: girdin-like	Cyp9f2 [Drosophila melanogaster] Dembeck Cytochrom P450	211.53	-3.23285	0.767773	-4.21069	2.5459e-05	0.000620378	291.428	8.96418	83.0977	447.11	372.856	0	105.209	316.542	444.918	875.935	71.4348	40.1023	112.263	23.1603	73.8409
CrematogasterSubCLCMeta_c28292	B	PREDICTED: zinc finger protein 568-like	NA	166.042	-3.23279	0.533187	-6.06314	1.3349e-09	1.07662e-07	286.97	35.3184	39.4483	269.965	417.586	32.7564	276.988	121.207	201.708	289.798	462.607	30.6541	173.769	0	32.8683
CrematogasterSubCLCMeta_s52536	B	PREDICTED: uncharacterized protein CG7065-like	NA	144.574	-3.23065	1.15381	-2.8	0.0051103	0.0469541	149.088	0	0	108.835	351.934	70.1068	276.619	106.255	359.399	321.543	339.473	0	169.016	76.7218	0
CrematogasterSubCLCMeta_rep_c13458	B	PREDICTED: uncharacterized protein LOC105192983 isoform X1	NA	85.0483	-3.23038	0.899089	-3.59295	0.000326958	0.00531871	207.272	0	10.9752	135.063	78.5767	0	114.898	112.115	98.9049	209.402	157.99	0	139.072	48.5106	30.1933
CrematogasterSubCLCMeta_rep_c2273	B	PREDICTED: uncharacterized protein LOC105668987	NA	337.29	-3.22735	0.80449	-4.01167	6.02898e-05	0.0012987	603.596	54.7279	52.1798	0	1115.74	12	597.695	291.121	333.676	790.402	909.651	60.0565	433.944	32.1538	145.341
CrematogasterSubCLCMeta_rep_c4801	B	PREDICTED: high affinity nerve growth factor receptor-like	NA	154.531	-3.22648	0.669242	-4.8211	1.42771e-06	5.17771e-05	209.579	9	23.4591	112.837	159.703	43.7071	421.697	369.647	176.797	31.6449	22.3097	32.7615	770	27	25.7556
CrematogasterSubCLCMeta_c22097	B	PREDICTED: tyrosine-protein kinase Abl isoform X3	NA	354.631	-3.22548	0.920181	-3.50527	0.000456152	0.00697284	469.271	36.0577	0	529.635	167.786	123.266	569.524	329.442	500.198	1447.03	756.914	27.0772	467.043	0	192.015
CrematogasterSubCLCMeta_s57070	B	PREDICTED: 1,5-anhydro-D-fructose reductase-like	NA	3084.09	-3.22418	0.604895	-5.33015	9.81342e-08	4.87688e-06	4553.08	556.523	270.961	4618.24	6009.72	1072.54	2441.92	6321.6	3087.56	6360.51	5639.66	588.615	6313.99	9.60112	681.868
CrematogasterSubCLCMeta_rep_c8168	B	NA	NA	20.2915	-3.22345	0.949775	-3.3939	0.000689041	0.00970593	52	2	0	43	27	6	40	39	45	0	9	12	42	0	1
CrematogasterSubCLCMeta_c11823	B	NA	NA	7.26015	-3.22069	1.11841	-2.8797	0.00398051	0.0385709	4.37162	0	5	13.1656	8.57027	0	25.6772	5.30695	7.30572	0	39.7772	0	10	0	3.31992
CrematogasterSubCLCMeta_rep_c31156	B	PREDICTED: beta-ureidopropionase isoform X1	NA	278.417	-3.2186	0.859197	-3.74605	0.000179641	0.00326978	669.565	7.24494	229.049	177.766	214.256	3.47731	402.572	665.938	488.199	289.852	518.654	21.8766	677.194	0	47.6611
CrematogasterSubCLCMeta_s59407	B	NA	NA	10.8673	-3.20203	1.11146	-2.88093	0.00396506	0.0384678	22.9708	9.70023	0	12.5504	1.75349	1.06478e-08	7.51713	18.9752	15.0133	35	33.8672	0	10.6692	0	0
CrematogasterSubCLCMeta_rep_c29567	B	PREDICTED: protein fuzzy homolog	NA	157.101	-3.20112	0.603208	-5.30683	1.11546e-07	5.5091e-06	302	25.0523	30.6903	201.099	246.04	67.6526	365.892	138.948	173.906	311.67	324.437	32.1776	278.667	0	7.85602
CrematogasterSubCLCMeta_rep_c29052	B	PREDICTED: LDLR chaperone boca	NA	248.479	-3.1981	0.776859	-4.1167	3.84334e-05	0.000888196	196.15	23.1542	0	456.617	269.59	187.19	685.148	495.813	403.293	248.283	354.585	17.3177	559.6	9.33728	23.3195
CrematogasterSubCLCMeta_rep_c19064	B	PREDICTED: 40S ribosomal protein S7-like	NA	3721.18	-3.19757	0.229568	-13.9286	4.24454e-44	1.19614e-40	4902.19	561.989	760.523	4976.62	5402.88	943.771	7462.81	7012.03	6529.69	6391.95	6026.55	651.161	6099.3	501.164	497.121
CrematogasterSubCLCMeta_s59547	B	PREDICTED: LOW QUALITY PROTEIN: G patch domain-containing protein 11	NA	154.566	-3.19663	0.984418	-3.24722	0.00116536	0.0148244	256.733	15.7666	0	193.314	483.991	0	250.115	142.141	183.254	345	258.661	0	179.271	83.2619	65.4678
CrematogasterSubCLCMeta_rep_c23960	B	NA	NA	101.845	-3.1944	0.840833	-3.79909	0.00014523	0.00271672	99.1173	5.64391	0	231.421	222.206	81.7889	195.752	145.81	175.715	143.862	139.345	11.5924	152.446	0	6.56929
CrematogasterSubCLCMeta_rep_c32175	B	PREDICTED: probable cytochrome P450 6a14	Cyp9f2 [Drosophila melanogaster] Dembeck Cytochrom P450	37.6547	-3.19285	0.658796	-4.84649	1.25667e-06	4.6453e-05	42.7488	11.1854	0	64.1828	187.026	1.58655	39.9011	46.844	46.9172	66.1397	44.4487	7.77389	16.4069	6.82757	10.8871
CrematogasterSubCLCMeta_s57058	B	PREDICTED: paramyosin, long form-like	NA	55785.2	-3.18506	0.987625	-3.22496	0.00125988	0.0157797	88174.3	5.97421	23293.7	84582.4	71888.5	23704.2	81309.2	93104	84528.1	200567	35356.3	13712.9	63542	278.061	138.525
CrematogasterSubCLCMeta_s60079	B	PREDICTED: WW domain-binding protein 11	NA	37.894	-3.18223	0.977467	-3.25559	0.00113157	0.014483	19.8461	0	0	54.0623	79.5257	0	78.8716	80.507	73.3907	57.9214	52.4214	12.6682	60.4672	27.1553	0
CrematogasterSubCLCMeta_s60049	B	PREDICTED: growth arrest-specific protein 2-like isoform X1	NA	396.895	-3.17861	0.889482	-3.57355	0.000352171	0.00565397	254.438	170.126	16.292	474.769	468.328	0	310.26	474.446	671.257	820.144	180.501	116.631	2265.17	2.92847	99.4507
CrematogasterSubCLCMeta_rep_c4200	B	PREDICTED: serine protease 42-like isoform X2	NA	3298.72	-3.17077	1.02067	-3.10655	0.00189283	0.0217771	7710.96	1168.57	433.84	3953.17	4435.68	796.804	4093.54	6343.8	4851.7	4194.06	9764.05	970.039	3633.28	0	0
CrematogasterSubCLCMeta_rep_c34462	B	PREDICTED: 5-hydroxyisourate hydrolase-like	NA	298.623	-3.15976	0.476218	-6.63512	3.24248e-11	3.64642e-09	435.443	38.9101	70.1899	448.794	700.264	125.674	555.144	632.19	610.307	530.385	169.343	23.4858	235.334	34.7877	28.5119
CrematogasterSubCLCMeta_s52215	B	PREDICTED: titin-like	NA	68.4396	-3.15629	0.404935	-7.79456	6.46333e-15	1.301e-12	121.443	10.4496	12.0696	168.544	107.559	3.33155	75.8514	109.436	117.542	45.6781	154.757	16.8954	116.218	11.0799	21.7818
CrematogasterSubCLCMeta_rep_c26493	B	PREDICTED: uncharacterized protein LOC105190622	NA	114.089	-3.15541	0.893344	-3.53213	0.000412223	0.00644109	248.829	32.7516	42.0724	223.645	80.3205	12	113.155	295.024	112.33	0	419.846	24.1725	209.099	0	11.1611
CrematogasterSubCLCMeta_s39161	B	PREDICTED: glutathione synthetase-like	NA	56.0739	-3.15539	0.885916	-3.56173	0.00036842	0.00586375	91.0523	0	0	83.7394	77.9947	27.6076	54.9826	129.317	103.133	84.2725	105.826	3.47536	91.8386	28.6865	0
CrematogasterSubCLCMeta_rep_c12656	B	PREDICTED: DNA polymerase delta subunit 3-like	NA	171.956	-3.15515	0.658853	-4.78885	1.67742e-06	5.96585e-05	326	20.7101	0	379.164	369.674	76.8102	248.004	72.3091	279	218.469	511.854	39.0968	197.168	36.9096	8.73251
CrematogasterSubCLCMeta_s57542	B	NA	NA	60.7133	-3.15236	0.97212	-3.24277	0.00118373	0.0149985	11.0971	39.5482	5.62332	102.378	107.585	0	99.769	39.4081	130.755	165.215	170.395	0	89.5078	13.1845	0
CrematogasterSubCLCMeta_rep_c39897	B	NA	NA	43.5333	-3.14002	1.10082	-2.85244	0.00433849	0.0411247	159	19.1811	0	92.5016	76.0566	0	108.153	72.3401	55.1363	34.0617	0	9.93417	25.6409	0	16.5541
CrematogasterSubCLCMeta_rep_c3329	B	PREDICTED: kunitz-type serine protease inhibitor-like isoform X2	NA	7128.25	-3.13963	0.645265	-4.86565	1.14081e-06	4.27308e-05	17225	599	1860	4976	8639.97	1184	6817	30077	13865	9281	418	2308	8374.99	605	1428
CrematogasterSubCLCMeta_s60691	B	PREDICTED: cytoplasmic tRNA 2-thiolation protein 2-like	NA	54.0303	-3.13896	1.07516	-2.91952	0.00350566	0.0350837	5.36502	0	3.31895	0	80.7389	28.2693	105.312	60.26	28.1359	148	176.154	12.8073	219	0	16.8232
CrematogasterSubCLCMeta_rep_c6232	B	PREDICTED: uncharacterized protein LOC105195820	NA	9.6983	-3.13681	0.973298	-3.22286	0.00126916	0.0158751	18	0	0	5	13	0	18	12	12	43	18	7	2	0	4
CrematogasterSubCLCMeta_rep_c5942	B	uncharacterized protein LOC105687462	NA	51.4859	-3.13317	0.702032	-4.463	8.082e-06	0.000232404	109.662	6	11.8735	38	165.342	0	136.978	30.1885	92.1114	80.2815	4.77788	11	100.869	18	9.66756
CrematogasterSubCLCMeta_rep_c35346	B	PREDICTED: solute carrier family 2, facilitated glucose transporter member 8-like	NA	56.0671	-3.13139	0.919578	-3.40524	0.000661051	0.00939454	44.1484	0	17.6771	153.364	128.609	31.5995	25.1362	116.539	102.78	18.9036	99.5995	12.7609	141.406	0	0
CrematogasterSubCLCMeta_rep_c33440	B	PREDICTED: ubiquitin carboxyl-terminal hydrolase 5	NA	363.202	-3.13045	0.967949	-3.2341	0.00122026	0.0153798	454.777	53.3052	136.189	1079.09	615.725	70.4206	97.6376	808.413	643.868	0	729.14	97.0955	952.074	0	50.2065
CrematogasterSubCLCMeta_s43872	B	PREDICTED: zinc transporter ZIP13 homolog	NA	4615.39	-3.12502	1.05387	-2.96527	0.00302413	0.0313247	8757.2	929.577	2298.41	2586.72	13696.9	0	10330.5	4535.95	4219.53	5483.74	12079	9.01598	7642.28	7.80496	2028.6
CrematogasterSubCLCMeta_rep_c38354	B	NA	NA	99.2079	-3.125	0.800823	-3.90223	9.53101e-05	0.00190648	81.2025	0	17	69.2368	205.228	14.7669	180.577	214.788	91.6725	377.535	2	32.0363	191.494	32	16.2386
CrematogasterSubCLCMeta_c6430	B	PREDICTED: dolichyldiphosphatase 1-like	NA	305.221	-3.12424	0.620196	-5.03751	4.71625e-07	1.98892e-05	407.569	118.932	75.4844	338.967	476.588	45.5134	517.539	545.919	629.684	524.441	420.939	0	623.857	53.7194	27.5774
CrematogasterSubCLCMeta_rep_c33389	B	PREDICTED: uncharacterized protein LOC105460453 isoform X3	NA	76.0013	-3.12387	0.830702	-3.76052	0.000169558	0.0031075	161.963	0	3.27013	133.815	137.225	0	120.556	143.157	111.191	47	58.6088	19.5859	197.472	54.4007	7.2437
CrematogasterSubCLCMeta_rep_c38996	B	PREDICTED: carbohydrate sulfotransferase 5-like isoform X4	NA	124.897	-3.12201	0.969116	-3.2215	0.00127521	0.0159258	154.49	9.45245	56.0784	199.46	435.191	2.65525	276.444	176.288	263.063	74.3975	0	62.3954	254.233	0	12.536
CrematogasterSubCLCMeta_rep_c34584	B	PREDICTED: cysteine--tRNA ligase, cytoplasmic	NA	142.524	-3.11459	0.977237	-3.18714	0.00143688	0.017517	80.8337	7.4449	86.423	126.53	51.1638	29.3764	62.9269	252.31	96.8818	156.034	1225.67	42.18	199.846	0	0
CrematogasterSubCLCMeta_rep_c37900	B	PREDICTED: uncharacterized protein LOC108778114	NA	49.6347	-3.11284	0.728472	-4.27312	1.92761e-05	0.000490924	114.306	1.70806	16.6983	99.1717	88.0279	13.5036	64.2179	38.278	38.3403	128.865	77.9956	0	81.2649	0	24.5002
CrematogasterSubCLCMeta_rep_c8833	B	PREDICTED: protein ALP1-like	NA	16.9151	-3.1113	1.0621	-2.92939	0.00339632	0.0342687	25	0	19	23	48	1	53	2	18	43	23	0	16	0	0
CrematogasterSubCLCMeta_rep_c26204	B	PREDICTED: pantothenate kinase 4	NA	337.922	-3.10763	0.943271	-3.29453	0.000985867	0.0129646	374.608	1.25197e-05	25.6134	524.076	651.94	0	731.743	516.394	708.115	499.834	996.064	80.0973	27.7436	99.6445	189.558
CrematogasterSubCLCMeta_rep_c38951	B	uncharacterized protein LOC111348736	NA	320.283	-3.1071	0.839271	-3.70214	0.00021379	0.00375441	846.943	0	175.577	1301.91	149.596	48.5736	595.181	364.523	234.94	877.199	40.9201	31.1984	131.045	48.289	71.9359
CrematogasterSubCLCMeta_s44736	B	NA	NA	8.03491	-3.10593	1.01451	-3.06152	0.00220214	0.0244513	25.9901	0	0	29.4878	12.9336	0	10.6245	5.11424	6.96595	12.0944	0	3	12.7933	5.23176	1.46903
CrematogasterSubCLCMeta_rep_c23600	B	PREDICTED: histone H3.3	NA	648.124	-3.10556	1.08815	-2.85397	0.0043177	0.0409762	1388.16	77.8237	82.0474	1277.76	38.9662	360.649	3326.79	23.4089	1805.66	0	105	107.695	1710.52	15.3748	79.9521
CrematogasterSubCLCMeta_rep_c30050	B	PREDICTED: UV radiation resistance-associated gene protein-like	NA	95.1651	-3.10498	1.00958	-3.07552	0.00210137	0.0235928	81.4123	0	75.7942	68.5579	93.4104	18.9491	157.275	39.3968	59.9344	242.069	451.349	17.3837	275.584	0	0
CrematogasterSubCLCMeta_rep_c3077	B	NA	NA	579.02	-3.10309	0.995944	-3.11572	0.00183493	0.0212235	102.348	131.501	102.101	183.954	3112.45	6.0059	80.0759	40.8876	2216.32	112.318	32.075	47.8248	2995.02	214.432	138.089
CrematogasterSubCLCMeta_rep_c1296	B	PREDICTED: mitochondrial Rho GTPase isoform X2	NA	1070.98	-3.09621	0.393018	-7.87804	3.32565e-15	7.01859e-13	1590.05	141.679	181.969	562.017	2885.81	211.019	1525.69	2393.42	688.411	2369.42	1651.07	246.908	1903.1	164.495	271.187
CrematogasterSubCLCMeta_rep_c11962	B	PREDICTED: monocarboxylate transporter 10 isoform X2	NA	1221.13	-3.09302	0.86715	-3.56688	0.000361261	0.00577475	2730.28	0	930.029	1993.2	1160.62	320.019	2086.23	2976.6	865.728	1915	2437	121.149	1520.17	55.2023	18.1759
CrematogasterSubCLCMeta_rep_c29950	B	ras-related protein Rab-11A	NA	119.271	-3.0891	1.05005	-2.94186	0.00326249	0.0332121	461.324	11.624	41.1271	622.259	15.3944	57.5052	472.551	70.1498	17.4635	7.41307	19.5496	8.2028	25.1504	0	18.0794
CrematogasterSubCLCMeta_s56824	B	PREDICTED: unc-112-related protein-like	NA	2748.82	-3.08801	0.721126	-4.2822	1.85055e-05	0.000474849	4693.96	1073.82	577.948	902.095	5120.68	808.089	5841.51	2955.86	3234.61	7154.24	4641.31	455.048	6056.66	23.8901	19.7873
CrematogasterSubCLCMeta_c28341	B	PREDICTED: uncharacterized protein LOC107882742	NA	6.08852	-3.08254	0.995279	-3.09716	0.00195383	0.0223341	2.75303	0	1.43824	8.89442	15.0875	1.55894	0	13.9668	20.1168	7.22511	11.1046	4.29678	11.0935	0	0
CrematogasterSubCLCMeta_rep_c38271	B	PREDICTED: uncharacterized protein LOC105204994 isoform X1	NA	45.7672	-3.07386	1.05401	-2.91634	0.00354163	0.0353993	39.8843	0	13.4071	81.4227	42.7105	0	120.202	50.6912	85.9218	116.662	121.8	41.1005	18.4512	0	0
CrematogasterSubCLCMeta_s43167	B	PREDICTED: elastin isoform X3	NA	37.898	-3.07222	0.970854	-3.16445	0.00155377	0.0186979	147.976	21.0996	0	126.266	38.6455	0	64.9384	44.6655	97.8929	1.60471	7.17671	6.17345	16.0374	9.01715	4.13066
CrematogasterSubCLCMeta_rep_c39837	B	PREDICTED: flap endonuclease 1-like isoform X2	NA	69.3607	-3.07097	0.659006	-4.66	3.16204e-06	0.000103191	106.891	2.2545	7.11534	121.591	82.364	0	118.739	46.828	114.177	237.56	121.525	19.8915	67.293	13.3077	41.1402
CrematogasterSubCLCMeta_rep_c37267	B	PREDICTED: sodium/potassium-transporting ATPase subunit beta-1-interacting protein isoform X2	NA	183.414	-3.07088	1.0368	-2.96187	0.00305778	0.0315754	385.744	0	0	252.592	430.102	10.4518	276.966	206.278	141.454	224.123	477.582	0	338.99	139.775	62.0546
CrematogasterSubCLCMeta_rep_c40038	B	NA	NA	845.076	-3.06911	0.650272	-4.71973	2.36154e-06	8.01234e-05	1800.02	165.864	358.419	2536.21	1114.5	4.82604	1266.87	1443.51	1197	1928.7	369.11	81.3473	380.85	193.386	171.732
CrematogasterSubCLCMeta_s43698	B	PREDICTED: leucine-rich repeat-containing protein 15-like	NA	213.914	-3.06605	0.718801	-4.2655	1.99451e-05	0.000504226	501.674	73.626	20	298.621	333.276	0	611.079	560.085	390.935	157.552	68.8286	58	125.593	31	56.1455
CrematogasterSubCLCMeta_rep_c3375	B	PREDICTED: uncharacterized protein LOC105204344, partial	NA	99.9221	-3.06472	0.418608	-7.32122	2.4572e-13	3.91086e-11	146.097	30.0011	28.4458	127.907	197.716	3.97612	171.634	183.896	160.721	205.768	99.8694	26.185	153.617	11.507	12.5068
CrematogasterSubCLCMeta_s54161	B	PREDICTED: adiponectin receptor protein	NA	754.487	-3.06067	1.02843	-2.97606	0.00291976	0.0305142	1412.01	62.483	74.9467	1741.49	1050.22	0	1640.78	2047.01	1400.46	387.732	678.769	681.772	454.841	0	65.4318
CrematogasterSubCLCMeta_c24866	B	PREDICTED: calsyntenin-1	NA	1255.33	-3.05637	0.87698	-3.48511	0.000491943	0.00743455	1596.86	5.56347e-06	405.256	2764.04	1948.93	902.177	2159.33	2188.72	2528.78	1890.32	1581.69	67.1649	1637.01	8.69179	101.212
CrematogasterSubCLCMeta_rep_c38196	B	PREDICTED: uncharacterized protein LOC105568608	NA	513.778	-3.05606	0.995616	-3.06952	0.00214403	0.023954	1238.68	107.454	457.566	2091.89	1159.39	2.10578	882.406	733.499	447.705	374.137	22.138	24.9361	398.494	13.4216	1.19373
CrematogasterSubCLCMeta_rep_c10134	B	PREDICTED: protein lifeguard 1-like	NA	39.7821	-3.05276	0.792628	-3.85144	0.000117425	0.0022782	84.9465	1.42882	0	40.2727	107.28	1.35594	17.6868	39.4808	39.9258	140.381	55.3808	3	54.632	13.8918	28.8645
CrematogasterSubCLCMeta_s60758	B	PREDICTED: nucleolar GTP-binding protein 2	NA	57.0686	-3.0478	1.07963	-2.823	0.00475764	0.0444124	26.1546	0	43.6031	34.6827	0	0	26.7036	71.5704	103.977	82.0032	313.549	2.79709	227.564	12.1237	11.2398
CrematogasterSubCLCMeta_c16	B	PREDICTED: uncharacterized protein LOC105556561	desaturase 1, isoform E [Drosophila melanogaster]	859.683	-3.0453	1.03457	-2.94354	0.00324478	0.0330966	59.653	46.9408	37.0324	2670.39	23.4713	57.1695	2388.93	78.6672	64.9224	1086.93	67.7238	318.392	6456.86	227.55	339.242
CrematogasterSubCLCMeta_c29762	B	PREDICTED: uncharacterized protein LOC108729589	NA	37.3911	-3.04308	0.859472	-3.54064	0.000399156	0.00626347	5.40438	0	11.7855	60.8863	82.4962	0	75.3789	77.3418	61.3452	64.3166	53.3769	18.2266	68.7554	0	16.4474
CrematogasterSubCLCMeta_s52816	B	PREDICTED: tetratricopeptide repeat protein 7B isoform X5	NA	522.853	-3.03718	0.753111	-4.03284	5.51064e-05	0.00120492	841.028	0	33.86	853.099	962.413	107.978	551.122	671.875	632.322	1108.54	1298.75	76.5547	805.067	365.722	23.2768
CrematogasterSubCLCMeta_s26872	B	PREDICTED: putative fatty acyl-CoA reductase CG5065	uncharacterized protein Dmel_CG10097, isoform C [Drosophila melanogaster] Dembeck FA reductase	94.1989	-3.03638	1.00129	-3.03245	0.00242577	0.0264517	75.8739	22.547	10.2948	90.9159	1409.56	28.3503	8	60.1786	72.7257	61.3372	1	8.04988	1017.89	36	1
CrematogasterSubCLCMeta_rep_c39455	B	PREDICTED: uncharacterized protein LOC105828295	NA	34.235	-3.03493	0.631011	-4.80963	1.51206e-06	5.44974e-05	71.391	2.26735	0	25.0343	60.6619	7.41045	32.1516	30.9377	42.5871	128.17	48.4907	14.8497	60.2757	2.83347	13.5487
CrematogasterSubCLCMeta_rep_c38309	B	PREDICTED: uncharacterized protein LOC105448075	NA	423.333	-3.03	1.05054	-2.88423	0.00392367	0.0381513	764.206	20.7386	0	779.841	499.729	0	156.17	459.356	272.106	619.028	2782.63	64.7604	175.419	367.988	35.4893
CrematogasterSubCLCMeta_rep_c20734	B	PREDICTED: uncharacterized protein LOC105567577 isoform X2	NA	134.422	-3.02653	0.503077	-6.01604	1.78732e-09	1.40498e-07	118.787	14.4018	12.5763	192.216	352.441	20.5979	175.265	147.001	228.739	301.84	280.633	74.3318	192.926	4.35559	34.9092
CrematogasterSubCLCMeta_rep_c39723	B	PREDICTED: trehalase-like	NA	1896.29	-3.02614	0.567469	-5.3327	9.67644e-08	4.81881e-06	5365.52	414.177	389.036	4247.4	3977.14	268.769	1685.94	2787.84	3964.42	2100.58	128.706	504.931	3027.16	158.208	500.389
76-PAR-Cr-FB2_PF_(paired)_contig_1272	B	PREDICTED: transcription initiation factor TFIID subunit 10-like	NA	242.947	-3.02431	0.598196	-5.05573	4.28756e-07	1.8307e-05	425.653	53.3635	73.8285	402.086	404.682	125.753	425	327.656	379.637	459	304.772	18.5268	414.905	4.70904	5.13157
CrematogasterSubCLCMeta_s35412	B	NA	NA	9.01795	-3.01998	0.984072	-3.06887	0.00214872	0.0240007	6	0	4.77442	31.6511	18	1.11289	16.6545	8.51034	16.2419	0	29	4.86912	9	0	0
CrematogasterSubCLCMeta_s59546	B	PREDICTED: peflin isoform X1	NA	213.565	-3.01953	0.836663	-3.60901	0.000307363	0.00506182	452.984	0	96.7156	241.452	288.042	40.7315	290.083	364.175	254.079	504.626	323.611	12.615	380.111	0	118.621
CrematogasterSubCLCMeta_c14114	B	PREDICTED: F-box/LRR-repeat protein 4	NA	8.05288	-3.01855	0.950484	-3.17581	0.00149421	0.018104	9	0	5	12	9	1	7	6	3.10939	50	15	0	5	0	4
CrematogasterSubCLCMeta_rep_c26511	B	NA	NA	110.93	-3.01665	0.517232	-5.8323	5.46697e-09	3.8459e-07	150.456	28.0433	25.0492	167.945	95.0485	20.7194	182.246	160.932	289.592	126.843	245.777	0	229.306	35.5997	19.2594
CrematogasterSubCLCMeta_s60520	B	PREDICTED: copper transport protein ATOX1	NA	117.433	-3.01578	0.980514	-3.07571	0.00210002	0.0235886	253.837	60.1948	55.4952	78.7763	190.571	17.4541	129.596	247.749	166.739	299.083	105.618	0	210.705	0.0206193	0
CrematogasterSubCLCMeta_rep_c35402	B	NA	NA	127.962	-3.01477	0.539639	-5.58664	2.31506e-08	1.3625e-06	234.571	19.1138	38	164.322	162.169	12	508.43	106.325	77.3541	196	427.009	34.4557	33.2234	27	23.1608
59-PAR-Cr-FB2_PF_(paired)_contig_8290	B	PREDICTED: pumilio homolog 2 isoform X5	NA	91.6409	-3.00993	0.791102	-3.80472	0.000141962	0.0026702	135.708	42.508	0	100.523	167.403	3.01577	162.541	91.606	206.772	124.052	206.604	37.5168	170.215	0	20.0046
CrematogasterSubCLCMeta_rep_c23353	B	PREDICTED: reticulocyte-binding protein 2 homolog a-like	NA	67.9562	-3.0075	0.659149	-4.56271	5.04987e-06	0.000154683	172.001	0	14	94.0015	90.0019	0	106.001	94.0006	114	109.005	148.003	32	70	16.0003	22.0001
CrematogasterSubCLCMeta_rep_c7530	B	PREDICTED: M-phase phosphoprotein 6	NA	101.754	-3.00497	0.475883	-6.3145	2.71032e-10	2.51634e-08	210	15.6895	36.7072	112	194	21.7996	171	136	160	139.335	227	16.6013	154.338	0	32.4599
CrematogasterSubCLCMeta_rep_c38151	B	PREDICTED: uncharacterized protein LOC108747896	NA	1076.71	-2.99818	0.978885	-3.06286	0.00219235	0.02438	2349.53	497.044	715.526	3284.28	1401.16	6.63963	1419.96	1483.34	1869.67	1930.3	487.855	4.15265	1215.81	1.09718	26.4983
CrematogasterSubCLCMeta_s59852	B	PREDICTED: copper chaperone for superoxide dismutase isoform X1	NA	363.608	-2.99163	0.873372	-3.42537	0.000613953	0.00888332	650.472	227.199	9.91893	4.50609	898.757	3.52913	417.076	365.632	891.871	1466.16	159.708	45.9472	382.877	68.0485	45.0342
CrematogasterSubCLCMeta_rep_c5253	B	PREDICTED: transferrin	NA	2439.42	-2.98991	0.792897	-3.77087	0.000162682	0.00299985	9618.75	656.452	233.762	117.161	1150.07	366.542	10816.2	1989.16	2403.96	280.252	7229.51	1085.49	2831.39	106.85	446.006
CrematogasterSubCLCMeta_rep_c39799	B	PREDICTED: uncharacterized protein LOC105564138	NA	7043.95	-2.98252	0.606795	-4.91519	8.86944e-07	3.44334e-05	15767.7	1032.13	2879.83	23566.8	7605.65	100	10073.1	11375.2	8852.54	15803.1	3395.2	986.951	3432.24	2063.37	1593.69
CrematogasterSubCLCMeta_rep_c14736	B	PREDICTED: uncharacterized protein LOC109503748 isoform X2	NA	5.59702	-2.9751	1.06531	-2.7927	0.00522706	0.0477763	15	0	3	16	18	0	6	6	9	0	7	3.54646	5	0	0
CrematogasterSubCLCMeta_rep_c36524	B	PREDICTED: uncharacterized protein LOC108768068 isoform X1	NA	46.6705	-2.97274	0.834492	-3.56234	0.000367563	0.00585401	50.2581	15.4439	0	68.5388	88.2786	0	81.9788	60.526	86.0527	38.0004	70.9008	28.0442	147.036	0	12.6217
CrematogasterSubCLCMeta_s60664	B	NA	NA	273.874	-2.97244	0.63204	-4.70293	2.5645e-06	8.60346e-05	568.486	22.5355	104.877	1082.79	181.13	13.2202	406.55	415.357	365.416	682.342	65.4714	48.0443	98.1717	83.0105	69.8265
CrematogasterSubCLCMeta_s57619	B	PREDICTED: UPF0586 protein C9orf41 isoform X2	NA	49.8901	-2.96516	0.862475	-3.43797	0.000586094	0.00856298	80.4087	0	0	30.8576	100.438	36.6303	56.0531	66.2409	98.881	90.5645	146.212	16.2931	72.6306	0	8.52657
CrematogasterSubCLCMeta_s54189	B	PREDICTED: E3 ubiquitin-protein ligase Bre1 isoform X1	NA	332.04	-2.96456	0.902742	-3.28395	0.00102363	0.0133269	263.552	173.092	93.4682	554.993	278.489	54.7326	575.232	416.125	411.299	310.808	1777.91	0	487.951	0	65.5878
CrematogasterSubCLCMeta_rep_c38470	B	NA	NA	124.302	-2.96294	0.825845	-3.58776	0.000333526	0.00540535	310.339	26.8773	57.936	227.808	27.5517	0	228.025	229.146	142.197	437.924	5.59593	10.3797	133.467	26.3924	33.1598
CrematogasterSubCLCMeta_c18085	B	putative dep domain containing protein	NA	6.48796	-2.95872	0.981025	-3.01594	0.00256183	0.0275426	21	1	0	20	1	0	11	3	15	11	5	6	7	0	1
CrematogasterSubCLCMeta_c21618	B	PREDICTED: esterase E4-like	NA	883.313	-2.95815	0.618886	-4.77979	1.75478e-06	6.20873e-05	1992.15	129.156	353.33	1751.26	1562	3.65701	1001.58	1238.17	1280.06	1856.88	257.526	181.045	1722.49	216.559	221.763
CrematogasterSubCLCMeta_rep_c27798	B	PREDICTED: 60S acidic ribosomal protein P2	NA	4436.39	-2.95776	0.40913	-7.22938	4.85192e-13	7.26378e-11	6812.33	718.068	1432.24	7132.95	7980.13	105.087	7532.53	7202.66	6641.82	7458.86	6865.83	1113.22	6941.71	1027.31	1131.67
CrematogasterSubCLCMeta_rep_c30450	B	PREDICTED: INO80 complex subunit D	NA	338.235	-2.95593	0.910315	-3.24715	0.00116567	0.0148244	776.395	22.5271	78.5988	332.26	640.764	144.174	799.505	402.532	669.639	232.023	212.223	174.644	883.762	0	0
CrematogasterSubCLCMeta_rep_c22853	B	PREDICTED: LOW QUALITY PROTEIN: uncharacterized protein LOC105561871	NA	1161.59	-2.9485	0.666943	-4.42092	9.82809e-06	0.000275322	1897.05	290.338	156.256	1906.91	6332.4	34.8289	616.492	538.312	839.82	1789.93	310.96	523.598	2763.58	175.934	242.701
CrematogasterSubCLCMeta_s56918	B	PREDICTED: fatty acid synthase-like, partial	FASN2 [Drosophila melanogaster] mb FA synthase Chung 2014	881.085	-2.93938	0.780529	-3.76588	0.000165965	0.00305217	875.461	123.598	38.7266	934.468	4673.8	9.40393	929.773	677.947	633.896	1399.71	449.015	21.6358	2353.8	309.051	623.274
CrematogasterSubCLCMeta_rep_c34045	B	PREDICTED: DNA repair protein XRCC2	NA	37.0418	-2.93704	0.975496	-3.01081	0.00260549	0.0278557	32.5166	15.2214	0	70	61.372	22	49	161.379	50.9383	10	2	1.24037	80	0	5.81262
CrematogasterSubCLCMeta_s56322	B	NA	NA	10.8134	-2.93631	0.872805	-3.36423	0.000767587	0.0105882	24	0	1	9	1.00829	2.71766	43.625	5.25854	17.4653	18	36.8807	4.09747	7.39961	0	5.51742
CrematogasterSubCLCMeta_rep_c20851	B	PREDICTED: actin-binding Rho-activating protein-like isoform X2	NA	215.465	-2.93582	0.880454	-3.33444	0.000854719	0.0115735	461.555	83.7046	51.0189	250.873	0	16.9783	123.195	738.795	758.559	299.725	75.6146	33.4006	324.036	6.00583	73.2114
CrematogasterSubCLCMeta_s34573	B	PREDICTED: N-acetyltransferase ESCO2 isoform X1	NA	348.108	-2.93576	0.555953	-5.28059	1.2877e-07	6.22501e-06	160.533	83.7822	64.0317	650.804	414.551	7.32972	828.64	336.1	438.376	529.343	1410.67	70.3978	480.092	36.7933	177.625
CrematogasterSubCLCMeta_c34571	B	NA	NA	15.7421	-2.93548	0.913515	-3.21339	0.00131177	0.0162809	12	0	0	31	16	2	11	30	17	61	31	17	17	0	1
CrematogasterSubCLCMeta_rep_c25564	B	PREDICTED: tropomyosin-1	NA	1441.66	-2.93065	0.864526	-3.38989	0.000699199	0.00981728	2623.17	1193.9	26.8305	1056.7	2241.45	70.5095	93.9666	2688.87	1727.66	6362.16	929.817	148.746	2676.91	40.4311	116.281
CrematogasterSubCLCMeta_s57049	B	PREDICTED: 3-phosphoinositide-dependent protein kinase 1 isoform X1	NA	835.278	-2.92907	0.726615	-4.03112	5.55115e-05	0.00121323	568.257	82.701	229.594	1431.43	178.983	82.728	218.342	1472.71	113.464	2581.03	5351.32	241.932	672.201	273.141	148.366
CrematogasterSubCLCMeta_rep_c37595	B	PREDICTED: zinc finger protein 260-like	NA	1342.21	-2.92606	0.197781	-14.7945	1.59077e-49	5.08061e-46	1868.41	194.329	295.451	1901.57	2271.63	355.024	2740.03	1822.58	2652.56	1851.54	2895.62	351.82	1745.9	239.392	257.592
CrematogasterSubCLCMeta_rep_c28382	B	PREDICTED: fatty acyl-CoA reductase 1-like	NA	61.1413	-2.92305	0.861318	-3.3937	0.000689554	0.00971031	143.314	4.05622	0	157.935	78.6158	1.07791	12.2444	128.412	157.376	147.601	15.3664	35.2917	19.5841	20.1411	18.2234
CrematogasterSubCLCMeta_rep_c518	B	PREDICTED: twitchin isoform X49	NA	14462.5	-2.91762	0.645358	-4.52093	6.15682e-06	0.000184002	29594.9	978.556	926.126	26873.5	15761.3	12479.2	25182.9	25842.6	23419.1	30283.3	7862.03	529.169	21361.2	1764.4	1499.25
CrematogasterSubCLCMeta_rep_c7408	B	PREDICTED: enhancer of split mgamma protein-like	NA	430.003	-2.91706	1.02024	-2.85919	0.00424725	0.0405324	524.137	0	237.172	1829	323.897	0	609.851	1125	350.571	917	141.277	23.8256	162.983	61.8165	258.736
CrematogasterSubCLCMeta_rep_c29853	B	PREDICTED: uncharacterized protein LOC105454670	NA	1153.37	-2.91486	1.01988	-2.85803	0.0042628	0.0406	2986.52	140.573	63.2996	3366.94	1411.56	579.048	4.43953	1948.47	0	2878.45	1646.7	190.313	2209.53	182.926	304.879
CrematogasterSubCLCMeta_s60037	B	PREDICTED: uncharacterized protein LOC105566342	NA	66.3856	-2.91173	0.723902	-4.02227	5.76401e-05	0.00125191	103	30.2616	14.3574	129.627	20.8942	0	130.008	84.0505	33.2858	114.933	238.363	2.02548	131.279	25.6805	7.91316
CrematogasterSubCLCMeta_s54245	B	PREDICTED: fatty acid synthase-like	FASN2 [Drosophila melanogaster] mb FA synthase Chung 2014	653.047	-2.91102	1.00909	-2.88479	0.00391677	0.0381074	372.522	99.6149	1.24601	523.322	886.454	34.263	3838.74	562.063	407.125	1743.88	984.436	0	175.925	248.409	461.623
CrematogasterSubCLCMeta_s43748	B	PREDICTED: receptor expression-enhancing protein 2-like isoform X1	NA	202.473	-2.90988	0.870426	-3.34305	0.00082863	0.0112872	296.602	116.972	0	321.618	439.644	0	318.707	260.735	126.045	226.548	498.31	43.0304	503.848	62.9961	13.0773
CrematogasterSubCLCMeta_s52427	B	PREDICTED: uncharacterized protein LOC108772634	NA	126.012	-2.90974	0.477244	-6.09696	1.08105e-09	8.86815e-08	113.791	17.999	48.674	283.797	109.993	38.4538	49.7571	186.452	339.816	258.392	285.337	31.1796	224.016	13.5355	10.8589
CrematogasterSubCLCMeta_rep_c38494	B	PREDICTED: minor histocompatibility antigen H13	NA	1027.59	-2.90965	0.430715	-6.7554	1.42444e-11	1.70177e-09	1586.59	164.681	301.736	2815.57	1799	304.242	1138.44	886.874	1254.69	2194.83	703.332	94.9693	2501.81	318.784	112.141
CrematogasterSubCLCMeta_s59403	B	PREDICTED: uncharacterized protein LOC105839802	NA	112.893	-2.90938	0.846833	-3.4356	0.000591234	0.00863018	540.077	28.2423	58.4131	289.768	115.14	0	163.293	78.1258	131.149	210.259	28	20.2994	44.1532	1	38.8433
CrematogasterSubCLCMeta_s52557	B	PREDICTED: uncharacterized protein LOC105201663 isoform X1	NA	356.719	-2.90471	0.754017	-3.85232	0.000117004	0.00227211	96.837	146.058	17.791	190.735	191.221	56.5482	266.704	744.768	609.331	125.654	3206.34	54.52	176.871	44.4548	119.007
CrematogasterSubCLCMeta_rep_c30151	B	PREDICTED: ataxin-10 isoform X1	NA	44.5389	-2.90196	0.690657	-4.20174	2.64872e-05	0.000640934	129.581	19.5521	6.9419	83.9375	77.0878	1.19517	50.8809	40.7161	47.824	25.2383	111.824	4.2761	91.4105	0	23.5778
CrematogasterSubCLCMeta_c10306	B	NA	NA	7.03385	-2.9002	0.96082	-3.01847	0.00254058	0.0274063	8	0	0	7	6	5	16	11	7	29	15	4	2	0	0
CrematogasterSubCLCMeta_s54143	B	NA	NA	23.939	-2.8949	0.965606	-2.99801	0.00271747	0.0288149	41.5866	1.94778e-07	0	56.4924	21.9093	0	25.5672	16.5988	70.969	54.7746	20.5563	0	37.9317	20.9033	9.95968
59-PAR-Cr-FB2_PF_(paired)_contig_4829	B	PREDICTED: ell-associated factor Eaf	NA	175.81	-2.89031	0.906893	-3.18704	0.00143735	0.017517	67.4739	38.9746	11.6695	267.327	236.32	97.498	119.512	53.1852	96.7844	478.937	1402.27	54.0414	20.8684	0	20.2059
CrematogasterSubCLCMeta_c18103	B	PREDICTED: uncharacterized protein LOC108727599	NA	5.55297	-2.88955	0.962404	-3.00243	0.00267831	0.0284817	7	3	0	20	17	1	5	1	5	6	19	0	3	0	3
CrematogasterSubCLCMeta_rep_c36770	B	PREDICTED: neurocalcin homolog	NA	536.587	-2.8852	0.502127	-5.74595	9.14073e-09	6.08201e-07	677.927	71.7075	110.686	381.111	326.997	240.195	1221.66	507.668	689.092	2104.7	1567.05	69.456	374.405	98.0785	102.654
CrematogasterSubCLCMeta_s54188	B	PREDICTED: phosphatidate cytidylyltransferase, mitochondrial	NA	274.682	-2.8813	0.634648	-4.54	5.62536e-06	0.000169876	176.089	26.308	109.83	320.428	124.059	3.13115	186.769	668.061	731.873	726.555	252.489	65.4518	751.924	98.0513	60.1527
CrematogasterSubCLCMeta_rep_c5992	B	PREDICTED: protein LSM14 homolog A-like isoform X2	NA	13645.5	-2.87455	0.807489	-3.55987	0.000371043	0.00589962	38227.1	2443.33	257.043	21102.7	26488.5	9021.03	19094.8	16467.1	26008.6	23804.8	4812.98	5359.22	19346.8	172.67	87.9068
CrematogasterSubCLCMeta_rep_c4864	B	PREDICTED: ESF1 homolog	NA	192.293	-2.87331	0.773469	-3.71484	0.000203331	0.00360244	290	46.5473	0	140.536	70.1404	14.5374	155.109	231.03	192.388	297.912	1439.89	87.6205	152.8	40.5472	56.1838
CrematogasterSubCLCMeta_rep_c35497	B	PREDICTED: PDZ domain-containing protein GIPC3	NA	270.496	-2.87118	0.514717	-5.57816	2.43074e-08	1.41838e-06	778.463	59.933	20.1372	355.526	955.156	130.338	304.282	341.393	153.226	448.38	342.499	35.6082	213.213	53.596	44.9293
CrematogasterSubCLCMeta_rep_c38628	B	PREDICTED: putative fatty acyl-CoA reductase CG5065 isoform X1	uncharacterized protein Dmel_CG10097, isoform C [Drosophila melanogaster] Dembeck FA reductase	619.066	-2.86809	0.771807	-3.71608	0.000202338	0.00358749	681.609	182.258	58.5434	3949.98	318.591	1.77458	591.862	547.533	722.555	1275.97	190.18	152.558	487.471	232.588	159.722
CrematogasterSubCLCMeta_rep_c27591	B	PREDICTED: LOW QUALITY PROTEIN: ral GTPase-activating protein subunit beta	NA	269.06	-2.86655	0.883081	-3.24608	0.00117008	0.0148608	586.302	141.363	10.553	430.721	443.782	74.6564	449.772	322.736	529.709	325.099	513.693	0	329.209	0	108.448
CrematogasterSubCLCMeta_rep_c26736	B	PREDICTED: uncharacterized protein LOC108755906	NA	605.095	-2.865	0.7006	-4.08935	4.32589e-05	0.000984515	598.177	152.857	1.59726	921.023	1046.33	51.7241	830.511	755.329	420.435	1054.66	2507.57	437.526	906.197	44.7561	88.0129
CrematogasterSubCLCMeta_s43919	B	PREDICTED: lipopolysaccharide-induced tumor necrosis factor-alpha factor homolog	NA	442.119	-2.86494	0.573849	-4.99249	5.9605e-07	2.43851e-05	1160.25	88.3706	161.925	375.767	1287.55	38.3377	672.214	846.544	640.718	858.477	344.444	38.8148	85.3711	56.3483	206.894
CrematogasterSubCLCMeta_s52817	B	PREDICTED: protein I'm not dead yet isoform X1	NA	904.123	-2.84483	0.892021	-3.18919	0.00142671	0.0174227	2055.3	84.8664	11.1768	2658.98	2430.79	11.2895	1869.48	85.8354	2234.28	34.8432	845.801	177.79	1094.77	150.654	819.17
CrematogasterSubCLCMeta_rep_c4792	B	PREDICTED: uncharacterized protein LOC106646287, partial	NA	42.0718	-2.84463	0.959493	-2.96472	0.00302958	0.0313572	129.567	33.4568	2.29092	165.507	73.7172	0	5.50652	59.4309	23.6765	52.5148	10.9923	6.06455	71.2144	0	9.86817
CrematogasterSubCLCMeta_rep_c35967	B	NA	NA	21.3629	-2.83999	0.969405	-2.92962	0.00339378	0.0342502	26	1	1	91	40	0	49	33	30	0	6	3	31	3	22
CrematogasterSubCLCMeta_rep_c23487	B	PREDICTED: chitinase-like protein Idgf4 isoform X1	NA	2931.7	-2.836	0.56674	-5.00405	5.6137e-07	2.31841e-05	971.853	530.507	725.421	3559.32	555.223	493.8	3117.01	8985.79	9923.15	4710.89	2385.74	615.626	7657.45	850.836	684.561
CrematogasterSubCLCMeta_s55759	B	NA	NA	29.3603	-2.83298	0.969012	-2.92357	0.00346042	0.0347763	27.978	10.9019	13.6087	141.93	21.7208	0	24.7156	60.373	88.9611	0	28.9973	5.22686	25.7429	0	8.81797
CrematogasterSubCLCMeta_s41938	B	PREDICTED: uncharacterized protein LOC105555657	NA	2416.97	-2.8324	0.650603	-4.3535	1.33983e-05	0.000359392	6639.56	330.425	602.728	8152.05	1981.89	1017.35	3780.1	4482.96	2227.08	5537.36	536.219	262.361	247.301	501.7	523.048
CrematogasterSubCLCMeta_rep_c22567	B	PREDICTED: leucine-rich PPR motif-containing protein, mitochondrial-like	NA	346.771	-2.82969	0.978287	-2.89249	0.00382196	0.0374742	525.245	63.0981	157.278	743.196	360.519	0	551.2	159.771	597.792	403.531	1046.78	3.90774	798.474	0	261.506
CrematogasterSubCLCMeta_s43316	B	PREDICTED: spectrin beta chain isoform X1	NA	1070.36	-2.82311	0.940377	-3.00211	0.00268117	0.0285057	2398.79	0	462.588	1083.33	2628.4	830.667	2454.75	1857.97	2112.31	532.089	880.963	43.793	1467.56	119.391	3.52518
CrematogasterSubCLCMeta_rep_c35395	B	PREDICTED: autophagy-related protein 9A	NA	295.652	-2.81822	0.521783	-5.40114	6.62175e-08	3.43321e-06	452.916	22.6679	49.6973	551.561	569.797	191.578	356.528	219.707	400.039	558.804	971.954	79.869	294.872	12.991	43.4422
76-PAR-Cr-FB2_PF_(paired)_contig_3361	B	uncharacterized protein LOC109860631	NA	37.6652	-2.81427	1.00015	-2.81385	0.00489517	0.0454482	116.838	7.67195	0	12.1077	75.7203	14.0994	113.086	42.3745	91.0532	0	46.4716	0	52.8711	23.5769	2.98891
CrematogasterSubCLCMeta_rep_c25140	B	PREDICTED: uncharacterized protein LOC105565840	NA	2188.06	-2.81039	0.807394	-3.48081	0.0004999	0.00753103	2104.37	543.418	7.5147	106.692	5260.93	814.836	7825.41	3991.15	2216.07	4344.11	1458.1	472.058	4041.04	70.1361	1047.86
CrematogasterSubCLCMeta_rep_c39755	B	PREDICTED: cytochrome P450 6k1-like	Cyp9f2 [Drosophila melanogaster] Dembeck Cytochrom P450	7793.15	-2.80652	0.606569	-4.62688	3.7121e-06	0.00011886	14232.2	2635.25	961.54	12190.5	10184.2	115.997	13621.4	10195.7	23982	13987.3	1494.86	1881.73	11633.3	2809.12	1871.11
CrematogasterSubCLCMeta_rep_c32230	B	PREDICTED: alpha-tocopherol transfer protein-like	NA	400.884	-2.80057	0.505782	-5.53711	3.0751e-08	1.74548e-06	918.031	172.088	37.4534	487.718	693.328	64.6536	748.061	588.033	414.595	591.878	167.35	34.842	1130.37	136.71	74.1933
CrematogasterSubCLCMeta_rep_c24975	B	PREDICTED: MOB kinase activator-like 3	NA	148.289	-2.79974	0.971302	-2.88246	0.00394586	0.0383048	279.391	50.639	59.1331	181.526	237.404	85.7829	252	200	204.576	265	339	0	198.698	0	0
CrematogasterSubCLCMeta_rep_c12586	B	PREDICTED: uncharacterized protein LOC108753205	NA	146.141	-2.79912	0.715384	-3.91275	9.12498e-05	0.00184038	378.997	9.85425	77.9035	319.652	282.243	0	105.126	122.418	54.8581	375.259	247.492	11.3026	217.827	54.1195	52.851
CrematogasterSubCLCMeta_rep_c12041	B	PREDICTED: uncharacterized protein DDB_G0271670-like isoform X3	NA	116.512	-2.7978	0.828463	-3.37709	0.000732563	0.0101931	339.975	15.5513	13.5764	83.1252	30.9694	112.519	245.466	164.121	299.005	79.623	361.735	6.40145	111.75	0	8.26017
CrematogasterSubCLCMeta_c31046	B	PREDICTED: uncharacterized protein LOC108772331	NA	29.2131	-2.79699	0.971627	-2.87867	0.00399353	0.0386736	27.862	10.8792	0	17.6211	5.26656	0	19.4821	97.5394	20.7431	44.1698	111.79	6.14565	79.9851	0	22.6944
CrematogasterSubCLCMeta_rep_c39844	B	PREDICTED: uncharacterized protein LOC105145134	NA	234.352	-2.79547	0.433539	-6.44802	1.13324e-10	1.13816e-08	470.62	50.5633	129.531	285.794	606.974	17.5078	453.793	237.38	221.093	515.681	305.469	50.8929	279.458	32.8255	39.7301
CrematogasterSubCLCMeta_c22623	B	PREDICTED: tetratricopeptide repeat protein 36 homolog	NA	20.6993	-2.78938	0.839514	-3.32262	0.000891763	0.0119268	32.4925	13	0	15	37.1311	2	6	23.0254	12.3458	106	30.2382	4	32.5179	0	8
CrematogasterSubCLCMeta_s59933	B	PREDICTED: spectrin beta chain, non-erythrocytic 5 isoform X3	NA	3675.18	-2.78793	0.809522	-3.44392	0.000573342	0.00841774	2340.04	427.335	1312.95	2424.37	6546.06	0	4709.6	4673.54	7553.67	3342.91	19538.2	761.182	4794.99	1097.23	1586.48
CrematogasterSubCLCMeta_s53220	B	PREDICTED: uncharacterized protein LOC105325790 isoform X1	NA	32.1967	-2.78624	0.988665	-2.81818	0.00482967	0.0449486	70.7237	9.69365	13.506	43.9561	0	5.21499	46.8768	78.4037	52.3903	103.675	49.8369	0	4.78905	13.7868	0
CrematogasterSubCLCMeta_rep_c32659	B	PREDICTED: sarcalumenin isoform X2	NA	977.183	-2.78477	0.636769	-4.37328	1.22393e-05	0.000331644	1435.94	117.99	240.806	950.688	1106.96	145.212	1538.05	1723.24	1958.63	2831.02	87.6502	181.838	2185.3	602.288	41.0921
CrematogasterSubCLCMeta_s43368	B	PREDICTED: breast cancer type 2 susceptibility protein-like isoform X2	NA	35.8139	-2.78346	0.959164	-2.90196	0.00370832	0.0366373	27.2784	5.96166	0	3.54666	77.3682	0	101.018	86.471	82.1016	45.7905	67.1415	29.9771	26.9667	0	13.8551
CrematogasterSubCLCMeta_rep_c15235	B	PREDICTED: uncharacterized protein LOC105669646	NA	34.1482	-2.78061	0.963234	-2.88675	0.00389248	0.0379482	48	1	0	61.206	24	0	51	15	46	134	51	28.2781	63.4009	18	0
CrematogasterSubCLCMeta_s44978	B	PREDICTED: integrin beta-PS-like isoform X1	NA	128.253	-2.77297	0.334781	-8.28293	1.20182e-16	3.21652e-14	205.218	29.0411	52.9901	225.425	172.676	6.75271	186.145	199.002	178.906	230.172	259.897	32.2685	196.809	30.6838	25.821
CrematogasterSubCLCMeta_rep_c31202	B	THAP domain-containing protein 1-like, partial	NA	55.4808	-2.77137	0.904359	-3.06445	0.00218069	0.0242898	48	26	30	83	165	0	84	58	39.3093	157.569	122	0	47	0	19.75
CrematogasterSubCLCMeta_rep_c391	B	PREDICTED: cytochrome b5-like	NA	4141.31	-2.76883	0.8292	-3.33915	0.000840347	0.0114176	7534.62	321.609	1028.5	11337	154.793	2822.28	5278.05	128.556	6929.13	15265.1	5055.03	197.637	8082.11	1067.07	309.724
CrematogasterSubCLCMeta_s52323	B	PREDICTED: 52 kDa repressor of the inhibitor of the protein kinase-like isoform X1	NA	30.7114	-2.76844	0.689311	-4.01624	5.91335e-05	0.00127954	35.7133	0	10.1693	46.3664	36.8019	18.2058	43.3186	46.6328	40.2223	60	110.492	0	31.5075	13.4669	2
CrematogasterSubCLCMeta_s57135	B	NA	NA	946.567	-2.76441	0.665831	-4.15182	3.29844e-05	0.000776122	419.071	644.426	215.547	1168.74	457.323	38.029	1491.23	1345.93	1802.76	2189.36	3169.55	84.1493	1926.92	199.425	31.4195
CrematogasterSubCLCMeta_rep_c36894	B	NA	NA	104.234	-2.76364	0.810357	-3.4104	0.000648681	0.00927376	93.9314	0	7.83669	134.098	140.779	71.6291	127.381	166.234	210.275	269.042	102.205	20.6682	252.79	0	49.3807
CrematogasterSubCLCMeta_s54277	B	PREDICTED: collagen alpha-1(IV) chain	NA	4493.76	-2.76077	0.572824	-4.81958	1.43859e-06	5.20928e-05	4865.84	694.607	1357.4	5814.72	3841.37	976.703	6893.35	14860.2	10132.2	6359.34	1186.51	2559.84	8850.15	264.942	464.525
CrematogasterSubCLCMeta_s54218	B	PREDICTED: 40S ribosomal protein S15	NA	716.021	-2.75576	0.541301	-5.091	3.56181e-07	1.55406e-05	947.744	128.995	162.347	885.367	908.55	8.08922	1211.05	883.075	1199.92	1030.54	2379.84	384.82	1133.96	75.9252	258.746
CrematogasterSubCLCMeta_rep_c11741	B	PREDICTED: upstream stimulatory factor 2-like isoform X2	NA	54.9248	-2.75449	0.959338	-2.87124	0.00408864	0.0393955	92.1306	0	0	113.02	145.738	38.063	66.2911	48.579	54.9598	66.4528	154.454	0	66.1798	35.6232	1.95839
CrematogasterSubCLCMeta_rep_c39916	B	PREDICTED: acyl-CoA Delta(11) desaturase-like	desaturase 1, isoform E [Drosophila melanogaster]	5011.76	-2.75426	0.48495	-5.67948	1.35105e-08	8.5052e-07	9801.67	712.106	2020.32	17678.6	5203.28	1087.75	7390.3	8458.96	6477.35	10199	2581.28	613.744	2382.11	1495.8	1173.4
CrematogasterSubCLCMeta_s44876	B	PREDICTED: regulator of nonsense transcripts 3A-like	NA	95.3503	-2.75116	0.918967	-2.99375	0.00275571	0.0291366	126.435	0	42.8932	117.835	183.147	0	168.126	97.7998	152.707	123.987	274.18	34.4923	163.722	58.9903	0
CrematogasterSubCLCMeta_rep_c39515	B	PREDICTED: putative nuclease HARBI1	NA	331.252	-2.75066	0.520057	-5.28915	1.22887e-07	5.98289e-06	819.703	11.9179	237.672	494.776	549.143	74.6576	344.202	324.88	804.541	720.691	434.865	46.0172	265.505	41.1071	72.5261
CrematogasterSubCLCMeta_s60498	B	PREDICTED: uncharacterized protein LOC105559078 isoform X1	NA	363.568	-2.74975	0.418655	-6.56805	5.09776e-11	5.53783e-09	465.455	76.8269	58.2637	217.897	685.128	52.5229	552.084	319.881	482.532	361.365	1820.08	111.665	607.486	101.337	108.934
CrematogasterSubCLCMeta_rep_c20283	B	PREDICTED: uncharacterized protein LOC108782329	NA	123.902	-2.74882	0.917268	-2.99675	0.00272874	0.0289089	27.7536	13.1618	30.1792	48.0104	16.0925	41.6326	20.7214	141.077	182.889	112.662	1014.75	71.3175	386.421	0	20.5296
CrematogasterSubCLCMeta_rep_c5417	B	PREDICTED: translocation protein SEC63 homolog	NA	754.325	-2.7458	0.327574	-8.38225	5.19269e-17	1.47199e-14	1531.1	197.81	204.43	1226.82	1167.04	55.0834	1171.06	1075.2	1069.72	968.52	1523.68	158.868	1188.78	125.879	326.747
CrematogasterSubCLCMeta_s60681	B	poly	NA	95.1311	-2.74027	0.728658	-3.76071	0.000169435	0.00310643	164	11.3567	38	383.445	72	0	124	141.787	119.315	192.271	88	5.09996	56	64	17
CrematogasterSubCLCMeta_rep_c32177	B	PREDICTED: GPI inositol-deacylase	NA	954.01	-2.73819	0.334684	-8.18142	2.80515e-16	7.14821e-14	1427.99	246.541	307.713	1239.97	1633.99	274.862	1327.57	1929.5	1666.26	1495	1032.31	78.7087	1865.04	147.8	291.166
CrematogasterSubCLCMeta_s52627	B	PREDICTED: isoleucine--tRNA ligase, cytoplasmic	NA	370.841	-2.73728	0.436239	-6.27472	3.50274e-10	3.17814e-08	381.158	72.0412	71.6033	507.108	451.116	42.8799	750.099	297.053	414.102	574.998	1486.31	209.889	678.741	82.4517	43.7163
CrematogasterSubCLCMeta_s60638	B	PREDICTED: DNA replication licensing factor Mcm3	NA	56.7867	-2.73525	0.794379	-3.44326	0.000574748	0.00842806	127.065	0	13.917	64	94.5784	36.0465	38.2998	58.612	81.531	65.7867	175.095	29.5512	132.626	0	1.64706
CrematogasterSubCLCMeta_s56974	B	PREDICTED: serine/threonine-protein kinase WNK1-like isoform X3	NA	612.898	-2.73274	0.500301	-5.46219	4.70302e-08	2.53439e-06	939.002	204.428	183.861	757.306	1069.65	68.6352	237.475	265.621	1182.59	732.378	2235.44	93.2698	1812.34	73.3662	244.025
CrematogasterSubCLCMeta_rep_c39971	B	NA	NA	48.4051	-2.72882	0.605639	-4.50569	6.6158e-06	0.000195644	89.3508	7.06094	9.24481	96.9256	125.529	11.1566	62.5335	55.0288	59.1326	32.8876	10.0418	6.192	165.034	4.36394	34.4311
CrematogasterSubCLCMeta_rep_c1571	B	PREDICTED: uncharacterized protein LOC108767969	NA	185.305	-2.72786	0.945852	-2.88403	0.00392625	0.0381686	512.795	14.405	9.68981e-05	426.068	454.991	114.052	483.207	153.459	178.679	36.4174	111.208	0	306.609	100.723	32.2033
CrematogasterSubCLCMeta_rep_c27080	B	PREDICTED: splicing factor, suppressor of white-apricot homolog	NA	431.585	-2.72476	0.439647	-6.19762	5.73244e-10	4.93928e-08	544.692	32.394	194.134	735.838	854.377	159.048	778.897	461.989	1018.87	552.104	700.072	80.9215	630.678	18.9268	152.223
CrematogasterSubCLCMeta_rep_c34249	B	PREDICTED: cyclin-G-associated kinase	NA	380.457	-2.72257	0.925303	-2.94236	0.00325725	0.0331658	365.911	81.5058	148.535	518.148	919.749	20.6967	557.552	413.697	635.743	861.373	811.98	292.584	442.799	0	0
CrematogasterSubCLCMeta_s43982	B	PREDICTED: probable cytosolic iron-sulfur protein assembly protein Ciao1 isoform X1	NA	153.748	-2.71758	0.838945	-3.23929	0.00119829	0.0151348	260	0	130.731	218	186.009	24.0194	208.547	217.362	191.747	128.852	561.193	59.6114	300.53	0.0364307	16.8891
CrematogasterSubCLCMeta_s60091	B	PREDICTED: zinc finger CCCH domain-containing protein 15 homolog	NA	76.2772	-2.7128	0.915671	-2.96264	0.00305012	0.0315077	10.4536	10.5432	0	95.6603	109.297	0	218.724	73.4179	32.2481	207.223	318.446	16.8006	64.1404	62.7256	17.4936
CrematogasterSubCLCMeta_rep_c11882	B	PREDICTED: uncharacterized protein LOC108769986	NA	907.046	-2.71116	0.890561	-3.04433	0.00233197	0.0256233	864.785	272.464	237.555	674.655	198.961	0	1535.57	1447.58	1067.17	585.389	6568.99	133.875	944.25	580.843	37.5524
CrematogasterSubCLCMeta_s43963	B	PREDICTED: uncharacterized protein LOC108753313	NA	332.238	-2.71044	0.881817	-3.0737	0.0021142	0.0237035	880.092	120.198	0	526.883	603.493	15.2814	378.294	832.309	742.793	242.488	336.625	3.29795	132.532	67.5844	272.938
CrematogasterSubCLCMeta_rep_c843	B	NA	NA	40.9959	-2.70508	0.791771	-3.41649	0.000634342	0.00911227	47	2.43928	14	19.4802	81.7817	0	58.3977	96.7003	128.689	59	44	11.3799	50.3003	0	35.8065
CrematogasterSubCLCMeta_rep_c996	B	NA	NA	140.425	-2.70435	0.759067	-3.56272	0.000367028	0.00584742	82.8255	5.27509	76.0526	4.34153	327.309	7.23987	362.927	257.202	349.614	103.184	87.3645	51.116	461.174	16.0187	57.866
CrematogasterSubCLCMeta_rep_c39471	B	PREDICTED: uncharacterized protein LOC108725999	NA	129.334	-2.70251	0.664413	-4.06751	4.75185e-05	0.00106557	154.847	4.37182	108.352	211.064	143.328	31.333	157.894	105.725	156.182	171.204	766.234	9.31054	91.5269	5.90412	38.6104
CrematogasterSubCLCMeta_s41825	B	PREDICTED: uncharacterized protein LOC108781195, partial	NA	417.059	-2.69861	0.786627	-3.43061	0.000602222	0.00876121	702.123	8.04392	58.5353	617.153	220.043	0	332.226	710.796	1138	854.192	378.055	250.513	999.416	160.125	143.832
CrematogasterSubCLCMeta_s54217	B	PREDICTED: 15-hydroxyprostaglandin dehydrogenase	NA	1018.54	-2.69309	0.924956	-2.91159	0.00359596	0.0358153	4545.9	717.378	9	375	240	309	1054.98	821	183.496	5315	399	67	1121	218	26
CrematogasterSubCLCMeta_c722	B	retrovirus-related Pol polyprotein from transposon TNT 1-94	NA	219.611	-2.69249	0.574666	-4.68531	2.79532e-06	9.26749e-05	157.222	65	53	761.387	151.998	4.92718	390.37	212.109	402.444	646.462	222.321	33	175.06	84.4153	77.0409
CrematogasterSubCLCMeta_rep_c22985	B	PREDICTED: zinc finger BED domain-containing protein 1	NA	186.348	-2.69196	0.44544	-6.04337	1.50928e-09	1.20709e-07	252	26.6603	34.8621	319.5	344.868	133.647	391.777	327.48	274.082	239.466	301.394	32.8064	219.119	22.1118	18.8153
CrematogasterSubCLCMeta_s52592	B	uncharacterized protein LOC105841774 isoform X1	NA	479.105	-2.69139	0.74005	-3.63677	0.000276077	0.0046456	715	107.549	146	1375	858	24.4937	425	24	811	1657	434.995	83.8296	558.551	311	9.77313
CrematogasterSubCLCMeta_rep_c30644	B	PREDICTED: uncharacterized protein LOC105203864	NA	848.939	-2.68845	0.641921	-4.18814	2.8125e-05	0.00067538	1291.74	51.0856	111.595	1789.57	1704.37	124.766	2511.8	687.024	1108.99	1502.71	95.3036	105.369	1381.06	686.641	155.862
CrematogasterSubCLCMeta_s57380	B	NA	NA	12.4883	-2.68682	0.748522	-3.5895	0.000331309	0.00537124	33.5715	3.93651	5.78149	14.4318	19.9737	7.8352	26.2029	14.3054	21.5798	5.51437	30.081	0	16.3352	0	0
CrematogasterSubCLCMeta_rep_c38268	B	PREDICTED: cytochrome P450 302a1, mitochondrial isoform X1	NA	20.994	-2.68443	0.939386	-2.85764	0.00426803	0.0406094	44.8098	0	0	26.9292	25.6671	2.30742	57	49.0145	18	40	16.5264	0	14.4822	2.09168	28.6945
CrematogasterSubCLCMeta_s59897	B	PREDICTED: ATP-binding cassette sub-family F member 3 isoform X2	NA	1452.58	-2.67999	0.501675	-5.34208	9.18886e-08	4.60954e-06	1701.3	361.025	580.581	1987.5	2172.08	42.7543	2191.5	1884.97	1792.77	2740.39	4601.48	564.886	2161.13	82.9976	529.554
CrematogasterSubCLCMeta_rep_c2110	B	PREDICTED: acyl-CoA-binding domain-containing protein 5-B	NA	2223.05	-2.67747	0.575305	-4.654	3.25561e-06	0.000105669	4545.13	246.27	257.847	2935.91	5428.59	1577.48	4338.81	2977.98	3584.36	3671.85	1647.93	926.491	2455.1	96.8881	159.239
CrematogasterSubCLCMeta_rep_c4322	B	PREDICTED: protein TBRG4	NA	535.401	-2.6725	0.804324	-3.32266	0.000891624	0.0119268	777.366	15.907	157.341	768.159	946.5	146.701	914.723	1067	1050.98	511.2	1635.92	131.117	77.5442	0	382.775
CrematogasterSubCLCMeta_c12057	B	PREDICTED: fatty acid synthase, partial	NA	16.4389	-2.66812	0.958233	-2.78442	0.00536235	0.0487557	21	0	0	14	1	11	14	6	6	22	89	3	79	2	9
CrematogasterSubCLCMeta_rep_c38507	B	PREDICTED: succinyl-CoA ligase	NA	216.51	-2.66648	0.894928	-2.97955	0.00288673	0.0302321	617.681	27.9438	54.6423	332.742	212.874	0	144.353	549.711	369.364	149.879	405.274	191.918	285.997	5.19983e-06	52.5182
CrematogasterSubCLCMeta_s60103	B	PREDICTED: acidic leucine-rich nuclear phosphoprotein 32 family member A	NA	598.37	-2.66646	0.86102	-3.09686	0.00195581	0.0223461	1284.97	317.024	183.01	758.502	541.436	0	549.092	266.459	1149.63	1865.64	970.631	14.5178	1250.06	15.6572	339.264
231-PAT-Cr-FB1_PF_(paired)_contig_35221	B	NA	NA	323.449	-2.66439	0.586928	-4.53956	5.63727e-06	0.000169959	731	37.6433	182	1085	326	11	407	547.292	459.685	638.897	139	69.9	164	115	74
CrematogasterSubCLCMeta_s52935	B	PREDICTED: uncharacterized protein LOC105258459 isoform X2	NA	34.8958	-2.66078	0.698199	-3.81092	0.000138452	0.00261444	81.3771	9.74965	0	15.8488	111.965	12.0465	95.2113	51.3415	46.194	22	43.732	1.81654	33.391	22.4673	4.04725
CrematogasterSubCLCMeta_s41426	B	PREDICTED: abaecin-like	NA	1291.22	-2.6552	0.860696	-3.08495	0.00203587	0.0230737	3621.55	209.457	110	263.643	518.244	34.1235	1753.93	486.99	331.601	436.797	12298.6	842.321	572.213	253	502.889
CrematogasterSubCLCMeta_s57600	B	PREDICTED: uncharacterized protein LOC105459542 isoform X2	NA	23.7167	-2.65356	0.508599	-5.21738	1.81468e-07	8.44858e-06	34	0	7	32	40	13.2568	23	27	27	52	44	9	64.1172	3	4
CrematogasterSubCLCMeta_s52758	B	PREDICTED: uncharacterized protein LOC108731062	NA	490.321	-2.64662	0.723549	-3.65783	0.000254361	0.00435048	610.448	147.794	161.031	145.915	1593.89	0	1060.86	775.414	644.845	335.589	1140.49	146.833	838.349	56.2509	228.808
CrematogasterSubCLCMeta_s54231	B	PREDICTED: COUP transcription factor 2 isoform X1	NA	3394.37	-2.64533	0.513202	-5.15456	2.54225e-07	1.15115e-05	5077.09	1294.5	1082.2	4082.56	1493.07	105.306	4774.49	5530.5	7697.21	3814.13	12840.6	605.906	4549.34	722.474	1220.38
CrematogasterSubCLCMeta_c4280	B	PREDICTED: uncharacterized protein LOC105556866	NA	23.6071	-2.64294	0.921076	-2.8694	0.00411251	0.0395698	37.4929	0	11.765	27	45.657	0	11.7026	26	28	0	40.8309	7	132.042	8	10.2615
CrematogasterSubCLCMeta_c6225	B	PREDICTED: uncharacterized protein LOC105566980	NA	16.8593	-2.63802	0.780186	-3.38127	0.000721516	0.0100686	78	0	6	13	34	0	17	5	36	10	41	5	12	10	5
CrematogasterSubCLCMeta_s60109	B	PREDICTED: uncharacterized protein LOC108760014	NA	92.9957	-2.63506	0.743925	-3.54211	0.000396942	0.0062328	90.6375	48.6878	21.3011	116.232	151.091	0	135.598	206.554	141.997	142.975	170.99	0	169.555	25.4162	40.7782
CrematogasterSubCLCMeta_rep_c33039	B	PREDICTED: inosine-uridine preferring nucleoside hydrolase-like	NA	104.891	-2.63471	0.533248	-4.94087	7.77757e-07	3.06415e-05	203.235	56.7658	3.27162	252.96	105.619	18.0088	170.4	229.695	177.571	130	66.7725	22.7005	129.303	21.2264	28.9755
CrematogasterSubCLCMeta_rep_c27770	B	PREDICTED: uncharacterized protein LOC105668987	NA	196.74	-2.63331	0.940605	-2.79959	0.00511668	0.0469781	464.822	22.2721	20.6176	0	655.785	0	341.477	172.124	194.628	283.511	373.362	101.919	369.441	39.0215	123.41
CrematogasterSubCLCMeta_s44049	B	PREDICTED: uncharacterized protein LOC105459110	NA	304.424	-2.63302	0.456661	-5.76581	8.12675e-09	5.4835e-07	345.474	75.6748	88.4521	334.951	551.037	34.6638	605.936	419.982	367.694	600.207	650.793	9.12222	512.869	113.247	141.389
CrematogasterSubCLCMeta_s60151	B	PREDICTED: cytochrome P450 4C1-like	Cyp4s3 [Drosophila melanogaster] Dembeck Cytochrom P450	222.253	-2.63138	0.869973	-3.02466	0.00248909	0.0269846	227.997	24.0614	39.205	1524.21	158.546	92.2235	197.823	215.554	212.576	447.235	0	49.1463	92.1413	87.0839	46.0443
CrematogasterSubCLCMeta_rep_c20762	B	PREDICTED: putative nuclease HARBI1	NA	194.888	-2.6296	0.644906	-4.0775	4.55229e-05	0.00102871	421.578	65.4257	71.7162	409.214	185.441	4	24.4983	77.5422	245.329	468	631.863	28.818	391.536	51.9447	71.5249
CrematogasterSubCLCMeta_c29735	B	PREDICTED: transketolase-like protein 2 isoform X2	NA	11922	-2.62206	0.495984	-5.28657	1.24629e-07	6.0615e-06	14391.3	5344.36	5620.84	15603.4	12245.9	2273.38	19777.5	25700.9	24030.5	13801.6	6767.78	1543.51	36697.5	1777.19	1048.51
CrematogasterSubCLCMeta_rep_c36490	B	PREDICTED: ras-responsive element-binding protein 1 isoform X2	NA	532.798	-2.62201	0.775634	-3.38047	0.000723616	0.010095	281.403	159.852	118.074	1819.02	1331.67	260.009	444.228	763.933	401.776	1523.68	194.768	87.7918	677.606	0	180.463
CrematogasterSubCLCMeta_rep_c1916	B	PREDICTED: actin-5, muscle-specific	NA	18138.9	-2.61698	0.603762	-4.33446	1.46121e-05	0.000386753	26810.1	3809.56	8045.22	18409.4	9600.96	1231.77	34429.1	34462.4	50104.6	47145.6	1687.52	4142.07	30817.4	7230.9	3280.53
CrematogasterSubCLCMeta_rep_c26075	B	NA	NA	86.8918	-2.61668	0.813881	-3.21506	0.00130416	0.0162113	109.609	18.8366	1.44559	70.6256	137.27	88.6917	243.961	138.019	299.116	69.9357	80.518	9.90278	95.3117	0	11.3624
CrematogasterSubCLCMeta_rep_c2999	B	PREDICTED: long-chain-fatty-acid--CoA ligase 5 isoform X1	NA	2950.63	-2.6146	0.546058	-4.78814	1.68334e-06	5.98248e-05	2779.02	977.145	308.525	2703.82	3462.17	539.353	8255	8986.1	3017.13	726.601	3272.45	413.077	8508.14	1059.39	1136.05
CrematogasterSubCLCMeta_rep_c39128	B	NA	NA	153.673	-2.61306	0.825116	-3.16691	0.0015407	0.0185733	432.041	4.73657	14.9728	166.722	246.773	27	185.134	280.475	246.27	359.286	0	129.953	213.935	31	32.0733
CrematogasterSubCLCMeta_s56829	B	PREDICTED: fatty acid synthase	FASN2 [Drosophila melanogaster] mb FA synthase Chung 2014	1590.15	-2.59576	0.726087	-3.575	0.000350234	0.00562853	2962.89	755.79	212.161	1481.71	2771.44	0	2083.69	2256.22	2606.39	3445.4	2337.92	415.545	2697.14	515.287	473.647
CrematogasterSubCLCMeta_s44651	B	zinc finger and SCAN domain-containing protein 29-like	NA	237.443	-2.59103	0.597385	-4.33728	1.44255e-05	0.000382871	439.452	127.223	72.2121	363.056	359.082	0	420.741	286.455	362.305	437.949	379.537	56.5759	341.466	45.6714	52.9256
CrematogasterSubCLCMeta_rep_c38504	B	PREDICTED: golgin-84 isoform X1	NA	195.339	-2.58589	0.784882	-3.29463	0.000985524	0.0129636	108.277	56.0428	65.5372	212.164	340.631	135.317	407.455	398.662	440.407	306.068	530.341	5.44119e-08	62.8314	35.7944	3.92792
CrematogasterSubCLCMeta_rep_c34132	B	PREDICTED: bis(5'-nucleosyl)-tetraphosphatase	NA	130.57	-2.58286	0.545265	-4.7369	2.17014e-06	7.41018e-05	186.906	8.61384	96.8996	230.82	195.286	37.0776	316.059	216.011	186.357	191.614	136.484	29.7785	186.519	1.68736	37.1366
CrematogasterSubCLCMeta_rep_c19589	B	NA	NA	7.88585	-2.58281	0.861236	-2.99896	0.00270903	0.0287445	21	4	3	10	16	3	13	19	2	0	18	1	13	0	1
CrematogasterSubCLCMeta_s52904	B	PREDICTED: high affinity cAMP-specific and IBMX-insensitive 3',5'-cyclic phosphodiesterase 8A isoform X5	NA	21.352	-2.58062	0.759534	-3.39764	0.00067969	0.00960643	12.3475	6.05995	0	25.4625	17.0793	10.6882	28.9594	44.2569	46.1404	13.181	16.7163	0	104.303	6.23235	9.90222
CrematogasterSubCLCMeta_rep_c3128	B	PREDICTED: glycine N-methyltransferase	NA	1037.64	-2.57108	0.763857	-3.36592	0.000762902	0.010537	2582.44	287.85	715.677	980.144	1111.55	56.0681	1039.49	1396.61	2276.19	2569.99	1416.39	270.25	1301.97	0	331.566
CrematogasterSubCLCMeta_rep_c4300	B	PREDICTED: lipase maturation factor 2-like	NA	1477.28	-2.56918	0.383177	-6.70495	2.01479e-11	2.36575e-09	2585.49	209.147	485.39	1986.54	2115.51	921.334	2553.17	2533.05	2589.81	1816.24	1806.58	229.877	2996.25	166.136	333.195
CrematogasterSubCLCMeta_s56912	B	PREDICTED: myophilin	NA	445.672	-2.56872	0.916036	-2.80416	0.00504471	0.0465659	769.312	0	0	342.689	373.594	78.1002	826.417	723.382	683.521	898.89	749.128	199.053	982.381	335.988	92.0043
CrematogasterSubCLCMeta_rep_c1799	B	PREDICTED: uncharacterized protein LOC105568656	NA	699.179	-2.5683	0.375799	-6.83424	8.24423e-12	1.03392e-09	1128.49	162.19	120.375	883.332	1662.88	374.051	1094.77	1355.85	1133.93	1081.26	518.946	132.94	956.895	175.717	121.362
CrematogasterSubCLCMeta_rep_c1621	B	NA	NA	97.6424	-2.56702	0.867294	-2.9598	0.00307836	0.0317492	167.751	0	38.1648	179.265	208.909	84.644	231.087	70.9425	191.352	205.257	38.3233	27.5246	87.159	0	6.43678
CrematogasterSubCLCMeta_rep_c32649	B	PREDICTED: uncharacterized protein LOC105559258	NA	214.868	-2.55881	0.436143	-5.86691	4.43978e-09	3.20326e-07	173.243	41.4437	32.2303	140.037	396.22	141.098	407.492	359	429.699	477	328.311	54.9866	349.661	30.2704	39.3394
CrematogasterSubCLCMeta_rep_c21773	B	PREDICTED: transcriptional adapter 1-like isoform X1	NA	53.8638	-2.55022	0.840326	-3.03479	0.002407	0.026303	39.4591	3.41505	15.3495	46.5836	44.2862	56.1779	34.8631	104.722	117.142	103.209	147.597	0	139.602	0	13.3539
CrematogasterSubCLCMeta_rep_c31096	B	PREDICTED: forkhead box protein K1 isoform X2	NA	556.491	-2.54979	0.771484	-3.30504	0.000949613	0.0125637	553.313	135.326	191.002	926.944	481.941	367.137	1317.45	475.655	769.869	1038.73	1817.98	170.384	728.668	0	14.216
CrematogasterSubCLCMeta_rep_c40102	B	NA	NA	300.787	-2.54726	0.665794	-3.8259	0.000130294	0.00248884	564.058	33.3123	28.6816	307.874	417.99	6.04188	612.121	671.062	420.907	596.354	147.108	227.101	434.403	164.262	18.8311
CrematogasterSubCLCMeta_s60620	B	PREDICTED: maspardin-like isoform X2	NA	71.8587	-2.54478	0.88102	-2.88845	0.00387145	0.0378046	124.514	10.9108	15.2135	110.106	103.089	0	20.2019	179.827	172.739	186.484	16.0471	44.4044	74.4189	0	49.2847
CrematogasterSubCLCMeta_s43260	B	PREDICTED: protein FAM151B isoform X1	NA	994.917	-2.54408	0.78194	-3.25355	0.00113971	0.0145772	1292.57	0	138.937	1319.2	3741.89	578.566	1123.45	1490.68	1573.5	896.757	1569.38	115.037	1219.67	91.7894	738.081
CrematogasterSubCLCMeta_rep_c23530	B	PREDICTED: dipeptidyl peptidase 9	NA	56.7549	-2.54337	0.88317	-2.87982	0.00397899	0.0385666	65.7624	29.536	32.3345	154.351	187.287	3.12981	11.9121	3.55119	77.4372	176.148	128.693	9.30945	11.0286	0	14.5286
CrematogasterSubCLCMeta_rep_c3975	B	PREDICTED: uncharacterized protein LOC105194456 isoform X1	NA	352.501	-2.54206	0.467409	-5.43862	5.36941e-08	2.8677e-06	642.579	53.2512	94.0796	182.673	630.489	32.3375	885.218	220.509	838.879	190.369	762.88	129.505	811.649	97.1299	169.993
CrematogasterSubCLCMeta_rep_c1770	B	PREDICTED: uncharacterized protein LOC105186742	NA	459.288	-2.53878	0.868778	-2.92225	0.00347518	0.0348733	1245.58	78.7424	36.0082	520.8	546.647	274.743	639.138	494.577	608.967	1316.6	0	14.0894	1018.25	89.8637	249.147
CrematogasterSubCLCMeta_s43889	B	PREDICTED: alpha-2-macroglobulin-like protein 1 isoform X1	NA	6123.72	-2.53733	0.882286	-2.87586	0.00402925	0.0389329	16213.1	303.516	5183.99	6721.62	8864.48	0	10769.8	12823.9	9798.54	5040.81	10124.5	2814.48	5925.74	1468.11	422.703
CrematogasterSubCLCMeta_rep_c24734	B	PREDICTED: protein mahjong	NA	338.536	-2.53426	0.778418	-3.25565	0.00113131	0.014483	448.796	36.6427	0	592.478	317.644	336.156	162.537	445.044	537.611	276.267	1484.53	44.4459	734.495	57.2028	67.2056
CrematogasterSubCLCMeta_rep_c7334	B	PREDICTED: palmitoyltransferase ZDHHC21-like	NA	420.529	-2.52923	0.726876	-3.47959	0.000502179	0.00755587	108.814	87.3826	109.007	168.316	833.737	151.006	1083.48	552.7	765.098	409.079	1193.58	153.563	1052.39	0	187.642
CrematogasterSubCLCMeta_c4040	B	PREDICTED: aquaporin AQPAn.G	NA	33.0156	-2.52745	0.748053	-3.37871	0.00072827	0.0101422	50.8643	0	0	47.9229	67.3201	5.55315	35.8163	33.1694	20.8523	57.2994	43.1967	30.9502	117.132	12.3127	4.91392
CrematogasterSubCLCMeta_rep_c34319	B	PREDICTED: zinc finger protein 2 homolog isoform X1	NA	111.833	-2.52603	0.684165	-3.69214	0.000222374	0.00387956	94.798	40.1091	8.0289	140.115	190.479	53.213	211.875	171.433	263.984	21.5413	342.875	37.5787	199.158	0	39.4112
CrematogasterSubCLCMeta_c10481	B	NA	NA	7.86744	-2.52051	0.877091	-2.87371	0.00405676	0.0391671	6	0	0	23	12	0	3	9	12.6156	11	32	9	6.47374	1.59924	2
CrematogasterSubCLCMeta_rep_c27466	B	PREDICTED: dolichyl-phosphate beta-glucosyltransferase	NA	336.083	-2.52025	0.420452	-5.99413	2.04575e-09	1.58329e-07	687	116.263	122.829	554.556	506	42.4311	553	662	563.768	646.644	358.043	128.385	139.537	63.8697	65.8655
CrematogasterSubCLCMeta_rep_c12075	B	PREDICTED: glyceraldehyde-3-phosphate dehydrogenase 2-like	NA	4915.51	-2.51966	0.59674	-4.22237	2.41743e-05	0.000593907	8590.75	307.366	480.006	9047.95	11092.7	3195.35	7757.16	5914.02	4909.2	5698.97	6002.57	3397.61	10905	295.215	356.124
CrematogasterSubCLCMeta_rep_c22878	B	PREDICTED: uncharacterized protein LOC107073003	NA	21.8921	-2.51871	0.867106	-2.90473	0.00367574	0.036383	20	0	7	13	89	0	56.113	13.8136	22	27	52	8	26	0	23.4614
CrematogasterSubCLCMeta_rep_c25643	B	PREDICTED: translation factor GUF1 homolog, mitochondrial	NA	156.52	-2.51547	0.816531	-3.08068	0.00206527	0.0233241	228.401	42.0446	0	254.585	251.577	110.624	240.062	294.745	297.105	202.222	173.997	72.1392	262.388	0	24.8776
CrematogasterSubCLCMeta_c37334	B	PREDICTED: uncharacterized protein LOC108755959 isoform X4	NA	84.63	-2.51469	0.833184	-3.01817	0.00254303	0.0274226	198.167	79.8238	7.18832	16.3639	88.4448	11.2419	173.409	113.432	29.033	216.578	80.6953	15.8176	277.107	0	11.166
CrematogasterSubCLCMeta_rep_c10383	B	PREDICTED: phospholipase D3-like isoform X1	NA	109.373	-2.50937	0.829131	-3.02651	0.00247394	0.0268507	306.291	5.03379	81.5931	141.488	267.876	38.7308	57.5711	154.422	188.427	0	178.233	6.47292	275.585	41.4368	9.55633
CrematogasterSubCLCMeta_rep_c38294	B	PREDICTED: uncharacterized protein LOC105556604 isoform X2	NA	184.492	-2.50504	0.52085	-4.80952	1.51296e-06	5.44974e-05	346.553	3.46543	80.3701	314.67	385.592	82.4462	372.328	214.1	303.062	241.688	286.848	91.5759	153.516	18.2901	36.1729
CrematogasterSubCLCMeta_s57882	B	NA	NA	44.4148	-2.50246	0.753793	-3.31982	0.000900762	0.0120169	72.7744	21.1264	10.3495	214.777	49.3968	0	60.1891	63.8818	55.7641	68.8003	12	5	13.3256	8.69235	27.0453
CrematogasterSubCLCMeta_c33478	B	PREDICTED: uncharacterized protein LOC105558916	NA	50.8359	-2.5001	0.824065	-3.03386	0.00241443	0.0263721	76.4881	16.1607	15.7129	129.432	55.2619	0	91.0323	62.6803	59.5576	162.164	10.0502	11.1175	54.6991	37.8782	0
CrematogasterSubCLCMeta_rep_c35898	B	NA	NA	60.7748	-2.49764	0.65853	-3.79275	0.00014899	0.00277407	55.2087	11.74	46.0778	59.2665	156.569	17.9676	125.496	102.961	68.0319	87.7318	10.6085	16.9585	188.941	7	1.07173
CrematogasterSubCLCMeta_s52856	B	PREDICTED: polypeptide N-acetylgalactosaminyltransferase 1 isoform X1	NA	421.891	-2.48695	0.487809	-5.09821	3.42881e-07	1.50701e-05	478.472	31.93	147.823	654.97	878.795	353.163	580.933	730.92	715.346	576.147	524.475	54.1373	824.541	47.9428	71.9327
CrematogasterSubCLCMeta_rep_c24606	B	PREDICTED: titin isoform X2	NA	1783.81	-2.486	0.597619	-4.15985	3.18458e-05	0.000752657	3264.38	73.3454	322.946	3561.18	2973.48	1803.27	2245.54	1856.38	2563.45	3703.92	1880.64	82.2271	3092.82	376.502	316.395
CrematogasterSubCLCMeta_rep_c4299	B	PREDICTED: 15-hydroxyprostaglandin dehydrogenase	NA	321.658	-2.48114	0.854862	-2.90238	0.00370338	0.0365992	1130.86	4.11144	81.8175	411.744	516.996	346.632	192.425	371.526	664.322	921.474	18	14.8846	193.929	74.7761	14.044
CrematogasterSubCLCMeta_rep_c2726	B	PREDICTED: testis-expressed sequence 2 protein	NA	325.472	-2.47994	0.491427	-5.0464	4.50206e-07	1.90905e-05	696.745	62.9517	25.0389	325.775	163.583	46.4879	202.369	575.597	641.752	598.44	849.397	187.064	582.486	87.8037	136.472
CrematogasterSubCLCMeta_rep_c1760	B	PREDICTED: DEAD-box ATP-dependent RNA helicase 20-like	NA	2077.6	-2.47988	0.388323	-6.38614	1.70124e-10	1.65317e-08	2156.34	503.669	536.307	2221.31	2777.2	1063	3502.73	2265.58	3610.38	1479.41	7555.81	270.452	5000.98	406.064	668.725
CrematogasterSubCLCMeta_rep_c5699	B	PREDICTED: NADH dehydrogenase	NA	80.3953	-2.47758	0.777198	-3.18783	0.00143344	0.0174871	212.402	63.4136	0	8.63761	143.744	17.4539	85.5898	63.8179	132.137	236.86	97.9066	25.4583	153.686	5.82264	12.9844
CrematogasterSubCLCMeta_rep_c22131	B	PREDICTED: BTB/POZ domain-containing protein KCTD5 isoform X1	NA	140.234	-2.47711	0.361265	-6.85677	7.04326e-12	8.97398e-10	256.38	27.9797	59.8537	74.4992	181.749	26.4741	213.297	262.179	214.815	232.349	326.033	30.9407	233.18	61.2409	27.9589
CrematogasterSubCLCMeta_rep_c40035	B	PREDICTED: protein nessun dorma	NA	12.3175	-2.47383	0.874951	-2.82739	0.00469293	0.0439507	18	1	12.3494	16	15	1	22	10.0849	43.571	0	34.2362	1	21.5834	6	0
CrematogasterSubCLCMeta_rep_c35141	B	PREDICTED: chromatin complexes subunit BAP18 isoform X2	NA	92.7057	-2.47252	0.698757	-3.53846	0.000402475	0.00630728	186.442	3.85416	1.27285	150.184	121.217	84.5121	101.606	164.944	60.9773	200.726	121.142	16.2776	186.973	5.27839	46.9908
CrematogasterSubCLCMeta_rep_c368	B	PREDICTED: LOW QUALITY PROTEIN: uncharacterized protein LOC105736982	NA	3745.18	-2.46566	0.732546	-3.36588	0.000762995	0.010537	4371.33	88.7564	2095.71	7966.18	4859.87	3231.55	9844.7	3963.52	3784.6	6896.15	2500.82	160.245	8496.17	55.4432	839.134
CrematogasterSubCLCMeta_rep_c32221	B	PREDICTED: acyl-CoA dehydrogenase family member 9, mitochondrial	NA	405.105	-2.45992	0.450536	-5.45998	4.7618e-08	2.56318e-06	586.809	196.888	172.35	568.993	702.509	95.7569	683.014	448.749	491.064	541.176	1010.81	31.7134	791.808	132.65	27.3299
CrematogasterSubCLCMeta_c21034	B	PREDICTED: uncharacterized protein K02A2.6-like	NA	7.83298	-2.45872	0.870046	-2.82597	0.00471383	0.0440946	10	0	8	4	16	0	9	9	18	16	10	0	20	0	6
CrematogasterSubCLCMeta_rep_c33493	B	NA	NA	170.551	-2.45354	0.853841	-2.87353	0.0040591	0.0391818	585.034	44.9281	22.9703	254.655	646.353	99.1848	84.8283	211.802	449.196	60.8429	71.0923	28.8789	18.7597	0	93.5037
CrematogasterSubCLCMeta_c34629	B	PREDICTED: uncharacterized protein LOC105188667	NA	417.702	-2.45345	0.569786	-4.30591	1.66302e-05	0.00043312	1023.2	79.1778	111.529	777.197	167.333	66.6569	225.971	805.857	776.906	1473.02	207.207	110.094	222.802	102.304	250.93
CrematogasterSubCLCMeta_rep_c26900	B	PREDICTED: uncharacterized protein LOC105143670	NA	94.1793	-2.44744	0.852548	-2.87073	0.00409519	0.0394428	129.418	0	27.4658	138.24	74.8031	14.2491	101.617	119.595	54.9892	184.17	118.77	31.4284	416.063	87.587	0
CrematogasterSubCLCMeta_s52515	B	PREDICTED: low-density lipoprotein receptor-related protein 2	NA	633.902	-2.44696	0.742825	-3.29412	0.000987293	0.0129762	744.015	13.0281	108.546	603.163	423.268	593.893	583.3	2366.2	2589.9	225.268	527.672	32.0549	679.519	101.018	248.995
CrematogasterSubCLCMeta_rep_c23407	B	PREDICTED: folliculin	NA	57.2247	-2.44573	0.842033	-2.90456	0.0036777	0.0363949	112.531	55.8573	5.29263	63.4705	133.67	0	106.056	71.3791	164.487	70.1107	35.5797	14.9924	46.5386	0	13.1409
CrematogasterSubCLCMeta_s53376	B	PREDICTED: soma ferritin-like	NA	89.9671	-2.44498	0.702986	-3.47799	0.000505193	0.00758692	45.4736	16.3346	78.2407	108.947	99.0929	10.4343	82.1588	78.4752	151.645	68.8532	416.391	28.6571	294.279	0	25.3671
CrematogasterSubCLCMeta_rep_c22344	B	PREDICTED: LOW QUALITY PROTEIN: PMS1 protein homolog 1	NA	2704.78	-2.4435	0.853461	-2.86305	0.00419591	0.0401728	1571.85	0	960.027	1493.73	1884.22	2175.57	6089.35	4567	1602.63	4569.22	12062.3	440.02	5599.11	314.425	842.319
CrematogasterSubCLCMeta_s40493	B	PREDICTED: uncharacterized protein LOC103307937	NA	54.1656	-2.44138	0.683741	-3.57063	0.000356129	0.00570796	164.097	6	17	138.829	78.1419	0	56.2863	51.1885	94.7526	46.1403	65.227	4	69.4196	12	58.1521
CrematogasterSubCLCMeta_rep_c22265	B	PREDICTED: serine/threonine-protein kinase PAK 3 isoform X6	NA	471.025	-2.4367	0.862126	-2.82638	0.00470767	0.0440575	849.675	0	5.64593	854.8	851.215	294.693	1068.54	551.223	659.714	525.395	846.048	37.3855	469.437	33.0261	474.663
CrematogasterSubCLCMeta_rep_c29545	B	PREDICTED: probable ATP-dependent RNA helicase spindle-E	NA	399.982	-2.43438	0.502989	-4.83983	1.29952e-06	4.75966e-05	740.406	105.372	190.664	714.046	582.692	96.1407	525.745	147.553	785.2	475	1432.06	16.8262	443.398	191.548	79.2281
CrematogasterSubCLCMeta_rep_c27720	B	PREDICTED: LOW QUALITY PROTEIN: RNA polymerase II-associated protein 1	NA	150.238	-2.4335	0.714351	-3.40658	0.000657811	0.00936932	299.691	0	3.1292	216.971	335.927	110.325	210.746	167.07	239.015	270.928	242.379	65.8419	137.151	21.6258	61.8573
CrematogasterSubCLCMeta_s42930	B	PREDICTED: uncharacterized protein LOC105462528 isoform X1	NA	334.201	-2.43258	0.434077	-5.60404	2.09418e-08	1.24358e-06	636.912	24.1954	120.105	420.819	393.243	23.5542	664.87	401.718	671.942	491.826	785.97	139.326	293.563	138.175	143.22
CrematogasterSubCLCMeta_rep_c11683	B	protein ALP1-like	NA	36.2988	-2.43237	0.74413	-3.26874	0.00108028	0.0139459	35.451	11.6051	0	96.7636	87.4836	18	27.3528	39.5755	21.5453	63	124	10.9272	26.1862	0	20.8232
CrematogasterSubCLCMeta_s43135	B	PREDICTED: fatty acyl-CoA reductase 1-like	uncharacterized protein Dmel_CG13091, isoform A [Drosophila melanogaster] Dembeck FA reductase	1827.56	-2.42956	0.70383	-3.45192	0.000556613	0.00821353	4785.26	346.845	1973.08	3443.61	2236.07	16	967.696	2865.91	2515.52	5006.02	810.265	287.124	2437.83	236.911	381.759
CrematogasterSubCLCMeta_s60202	B	PREDICTED: titin homolog	NA	14.5629	-2.42524	0.834151	-2.90743	0.00364408	0.0361664	24.4002	0	0	18	35.4435	1.28347	17.4678	24.9511	11.58	28	30.9778	16.2723	14.5772	0	9.05422
CrematogasterSubCLCMeta_rep_c3963	B	PREDICTED: putative nuclease HARBI1	NA	44.9388	-2.42297	0.561262	-4.31701	1.58157e-05	0.000413808	47.9519	5.52489	4.7005	80.8554	75.7363	1.13881	55.8202	37.9534	107.204	89.0508	93.2953	21.8452	54.4367	34.5837	7.65808
CrematogasterSubCLCMeta_s55589	B	PREDICTED: uncharacterized protein LOC108721767 isoform X3	NA	89.5911	-2.42225	0.674799	-3.58959	0.000331197	0.00537124	139.906	0	20.0629	54.5177	147.507	10.4024	73.7552	116.544	100.958	60.6407	250.768	24.3424	356.264	73.0586	29.6561
CrematogasterSubCLCMeta_rep_c31107	B	PREDICTED: transcription factor CP2-like protein 1, partial	NA	193.496	-2.42125	0.489935	-4.94198	7.73349e-07	3.04929e-05	249.584	50.6771	72.7752	364.821	266.86	139.295	271.389	282.573	183.441	368.388	382.183	27.3666	363.175	6.62589	34.9137
CrematogasterSubCLCMeta_c30016	B	NA	NA	29.0894	-2.42076	0.791296	-3.05923	0.00221905	0.0245969	56	3	0	47	38	22	22	24	69	88	9	0	52	15	10
CrematogasterSubCLCMeta_rep_c22355	B	PREDICTED: gonadotropin-releasing hormone II receptor	NA	1008.23	-2.41867	0.802017	-3.01573	0.00256358	0.0275552	1083	148.149	5.20265	1701.29	5364.99	579.179	995.013	1122.35	2926.9	571.376	246.23	309.805	180.075	145.207	578.932
CrematogasterSubCLCMeta_c37819	B	NA	NA	25.1773	-2.41725	0.53475	-4.52033	6.1743e-06	0.000184179	30.1669	7.70271	11.6036	46	40.7118	11.4329	21.5433	39.5437	66.6747	64	17.0204	6.17499	22.1515	4.5936	1.14846
CrematogasterSubCLCMeta_rep_c37765	B	NA	NA	36.9269	-2.41662	0.781937	-3.09055	0.00199786	0.0227073	45	5.5349	0	51.9807	99.9596	0	18	27.9707	32.5441	137.562	33	17.7579	69.4006	14.7884	25.8799
CrematogasterSubCLCMeta_c36201	B	PREDICTED: run domain Beclin-1-interacting and cysteine-rich domain-containing protein	NA	190.55	-2.41342	0.694335	-3.47586	0.000509209	0.00763309	155.785	35.1961	0	208.28	308.437	9.39227	273.964	290.891	272.198	507.135	249.795	68.5044	408.141	78.799	144.362
CrematogasterSubCLCMeta_s60184	B	NA	NA	19.7188	-2.41256	0.781839	-3.08575	0.00203042	0.0230227	0	8.96269	4.8576	62.6951	34.7943	9.96411	20.0448	39.4163	19.5952	18.4299	32.1958	4.73484	50.9398	4.46806	0
CrematogasterSubCLCMeta_rep_c23028	B	PREDICTED: ATPase WRNIP1-like	NA	141.483	-2.41245	0.813196	-2.96662	0.00301088	0.0312078	52.9166	3.83737	13.0704	333.337	200.845	109.396	281.872	183.043	235.293	276.371	296.53	0	144.653	107.117	10.1816
CrematogasterSubCLCMeta_rep_c40187	B	PREDICTED: uncharacterized protein LOC109408475	NA	17.8391	-2.40914	0.848887	-2.838	0.0045397	0.0427612	20	0	15.1505	18	18.0852	0	30	12.1578	15.3125	539	100.114	6.13667	38.8391	0	12.2822
CrematogasterSubCLCMeta_s44011	B	PREDICTED: LOW QUALITY PROTEIN: nucleolar protein 58	NA	205.497	-2.405	0.830158	-2.89703	0.00376708	0.0370836	231.777	97.0956	107.815	97.6369	115.025	88.415	120.093	136.17	210.01	277.917	1624.24	0	320.651	9.56163	47.5418
CrematogasterSubCLCMeta_rep_c4736	B	PREDICTED: uncharacterized protein LOC108721132	NA	93.6299	-2.40389	0.856607	-2.80629	0.00501149	0.0463128	220.579	0	8.58537	183.055	215.375	0	188.939	61.2445	82.723	138.762	35.4001	62.1572	184.438	26.3741	73.5801
CrematogasterSubCLCMeta_rep_c5956	B	PREDICTED: alaserpin-like isoform X3	NA	264.322	-2.39994	0.562164	-4.2691	1.9626e-05	0.000497473	661.598	15.183	106.423	43.2724	118.844	80.218	643.378	579.246	330.669	350.732	351.846	104.322	601.866	87.0147	80.7301
CrematogasterSubCLCMeta_rep_c3564	B	PREDICTED: protein lifeguard 3-like	NA	52.025	-2.39958	0.608485	-3.94354	8.02884e-05	0.00165364	139.054	15.6732	15	118.727	126.236	33.8366	43.0818	69.2844	68.7436	43.1701	31.6192	16	83.6718	0	8.50863
CrematogasterSubCLCMeta_rep_c4960	B	PREDICTED: UDP-glucose:glycoprotein glucosyltransferase isoform X2	NA	1223.42	-2.3985	0.472404	-5.07723	3.82987e-07	1.65593e-05	2298	344.275	393.781	2016.88	1492.23	682.769	2266	2384.97	1016.58	790.919	2546	427.086	2432.39	201.038	59.2555
CrematogasterSubCLCMeta_rep_c28323	B	PREDICTED: HAUS augmin-like complex subunit 3	NA	30.3544	-2.39494	0.694541	-3.44824	0.00056425	0.00830489	45.8482	0	20.3877	16.6985	42.0615	16.518	58	27.6409	74.009	44	13.374	10.6955	109.099	1.42636	5.64144
CrematogasterSubCLCMeta_rep_c35541	B	PREDICTED: striatin-interacting protein 1	NA	7709.01	-2.39127	0.367886	-6.50004	8.02968e-11	8.34442e-09	11332.3	1615.6	3957.53	12469.3	9484.29	3087.1	10026.3	14135.9	17769.1	11766.8	5132.66	2400.51	15085.8	1102.09	1489.61
CrematogasterSubCLCMeta_rep_c38913	B	PREDICTED: uncharacterized protein LOC105147036	NA	465.396	-2.38934	0.5899	-4.05041	5.11281e-05	0.00113256	1414.22	25.371	158.688	399.104	682.635	32.4992	356.483	973.241	567.522	1023.8	148.374	159.132	778.653	155.239	323.439
CrematogasterSubCLCMeta_rep_c34890	B	NA	NA	232.244	-2.38662	0.531166	-4.49317	7.01697e-06	0.000205855	182.013	52.6238	13.4038	191.372	352.906	68.5631	613.032	213.446	557.4	677.634	186.435	155.515	281.8	32.8356	85.7204
CrematogasterSubCLCMeta_rep_c5197	B	PREDICTED: ankyrin repeat domain-containing protein 27-like isoform X1	NA	261.82	-2.38375	0.368218	-6.47376	9.55924e-11	9.76449e-09	410.635	30.3608	92.2571	238.071	325.688	48.3481	339.112	332.129	322.289	453	973	136.414	377.976	85.9503	77.9345
CrematogasterSubCLCMeta_rep_c337	B	PREDICTED: uncharacterized protein LOC105196091 isoform X1	NA	727.3	-2.38071	0.670747	-3.54935	0.000386185	0.00608384	637.181	148.022	31.1965	808.309	213.521	673.553	1470.48	222.484	1566.85	1206.01	3453	90.8004	1200.22	217.379	100.991
CrematogasterSubCLCMeta_rep_c39072	B	PREDICTED: macoilin-1 isoform X2	NA	340.916	-2.37987	0.625896	-3.80234	0.000143335	0.00268968	588.579	29.5693	141.655	258.409	467.953	215.203	702.672	1017.86	384.566	404.032	281.171	2.92172	558.133	72.9886	154.501
CrematogasterSubCLCMeta_c11992	B	PREDICTED: uncharacterized protein LOC105451287	NA	400.227	-2.37616	0.795975	-2.98522	0.00283377	0.0298368	46.5429	109.03	76.8943	39.604	492.999	135.993	139.795	1439.61	1567.04	1253.44	111.46	43.2645	314.604	247.457	83.9838
CrematogasterSubCLCMeta_rep_c35872	B	PREDICTED: choline-phosphate cytidylyltransferase A-like isoform X1	NA	24.4207	-2.3743	0.732135	-3.24299	0.00118284	0.0149911	39	14.7428	15.6892	17.0329	17	6.96931	22.1288	57.3532	55.1263	10	46.5835	3.01349	82.1057	0	1
CrematogasterSubCLCMeta_rep_c3791	B	PREDICTED: uncharacterized protein F13E9.13, mitochondrial isoform X2	NA	73.1872	-2.37236	0.596677	-3.97596	7.00959e-05	0.00147789	179.958	22.9975	15.6358	26.1943	82.2855	44.0691	9.06683	121.981	221.756	140	101.107	19.2023	144.216	12.7212	13.4112
CrematogasterSubCLCMeta_rep_c32526	B	PREDICTED: flavin-containing monooxygenase FMO GS-OX-like 2	NA	35.1722	-2.37153	0.776008	-3.05607	0.00224261	0.0248351	34.8871	2.86993	0	11.8736	66.2099	19.9673	36.4124	97.6962	117.062	15.085	34.0834	19.4614	78.7058	0.959237	20.6322
CrematogasterSubCLCMeta_s53461	B	uncharacterized protein LOC111034053, partial	NA	74.7601	-2.37116	0.584056	-4.05981	4.9112e-05	0.00109688	151.623	6	59.0285	91.8638	158.194	0	116.343	112.732	83.0388	78.5867	131.544	32.021	128.447	17	23.5268
CrematogasterSubCLCMeta_rep_c38169	B	PREDICTED: uncharacterized protein LOC103575375	NA	4756.59	-2.36977	0.482828	-4.90811	9.1957e-07	3.53846e-05	9776.32	1087.75	1324.89	7029.27	7612.75	106.796	9433.88	5642.07	9016.63	7178.7	6144.64	1988.38	4781.99	2520.63	1434.02
CrematogasterSubCLCMeta_rep_c29483	B	PREDICTED: 27 kDa hemolymph protein-like	NA	346.349	-2.36752	0.437029	-5.41732	6.04984e-08	3.18494e-06	701.026	78.6263	47.4829	507.171	548.721	23.9824	525.632	334.482	502.899	654.825	594.103	93.2617	510.711	252.369	116.773
CrematogasterSubCLCMeta_s31937	B	PREDICTED: uncharacterized protein LOC105563014 isoform X2	NA	749.674	-2.36499	0.771326	-3.06613	0.00216846	0.0241873	665.698	390.452	0	991.737	1087.99	177.735	1462	1143.12	1483.88	591.787	1541.22	228.749	1722.4	434.721	28.6867
CrematogasterSubCLCMeta_rep_c7306	B	PREDICTED: negative elongation factor B	NA	270.595	-2.36341	0.367074	-6.43852	1.20643e-10	1.1991e-08	379.018	32.3802	34.5914	342.456	584.313	68.2227	562.441	358.381	530.804	345.286	449.425	149.087	266.182	104.489	101.175
CrematogasterSubCLCMeta_rep_c12406	B	PREDICTED: uncharacterized protein LOC105206511	NA	42.4673	-2.3629	0.728282	-3.24449	0.00117661	0.01492	65.9538	5.5283	15.1598	56.9186	124.585	36	74.4345	38.5201	69.5448	70.9918	49.3549	19.0239	45.5128	0	0
CrematogasterSubCLCMeta_rep_c22200	B	PREDICTED: uncharacterized protein LOC108029006	NA	24.0657	-2.3616	0.816122	-2.89369	0.00380748	0.037348	23	11	6	32	25	13.1945	12	98.6715	13	0	64.4172	1	65.7602	4	7
CrematogasterSubCLCMeta_rep_c35353	B	PREDICTED: zinc finger protein 394-like isoform X1	NA	416.868	-2.36106	0.838307	-2.81646	0.00485556	0.0451593	187.856	25.5484	333.366	15.3483	777.594	161.003	673.171	924.486	554.897	552.138	446.454	224.22	1744.15	2.97808	22.5215
CrematogasterSubCLCMeta_rep_c32738	B	PREDICTED: high affinity cAMP-specific and IBMX-insensitive 3',5'-cyclic phosphodiesterase 8A isoform X5	NA	9.30468	-2.35674	0.82344	-2.86206	0.00420892	0.0402712	15.1034	0	0	7.09679	4.36707	8.03698	8.06557	16.1734	19.5921	15.065	10.1421	5.01463	36.3501	0	3.93864
CrematogasterSubCLCMeta_rep_c2487	B	PREDICTED: DAZ-associated protein 2-like	NA	1629.6	-2.35468	0.75704	-3.11037	0.00186852	0.0215284	2637.97	125.177	1765.2	2699.84	1799.14	967.13	3027.08	988.715	3682.42	2238.99	3102.21	16.853	3096.83	108.027	39.6914
CrematogasterSubCLCMeta_rep_c35480	B	PREDICTED: histone-lysine N-methyltransferase SETMAR-like	NA	15.9196	-2.35217	0.691028	-3.40388	0.000664369	0.0094277	12.4309	0	0	20.8301	28.2353	13.0409	15.6866	16.2732	26.1827	39	50.423	10.1093	19.6361	2.1118	4.38544
CrematogasterSubCLCMeta_rep_c23999	B	PREDICTED: collagen alpha-1(IV) chain-like	NA	5100.26	-2.35187	0.378216	-6.21832	5.02512e-10	4.37706e-08	5047.66	1857.66	1471.87	6981.81	5709.43	1225.27	7171.68	14554	11749	6976.8	3159.34	1390.18	8493.63	1729.06	1361.34
CrematogasterSubCLCMeta_rep_c24459	B	NA	NA	10.2996	-2.34651	0.78337	-2.9954	0.00274082	0.0290148	3.45884	1	0	16.3823	4.29255	6.90269	17.1681	11.1544	18.262	14.2277	36.7009	4	30.0753	0	7.19395
CrematogasterSubCLCMeta_rep_c33624	B	PREDICTED: LOW QUALITY PROTEIN: beta-galactosidase-like	NA	221.395	-2.34605	0.692642	-3.3871	0.000706345	0.00989843	186.196	71.483	83.6992	381.077	271.747	36.9801	327.599	479.844	261.445	357.48	99.2165	0	691.703	47.0752	166.99
CrematogasterSubCLCMeta_c6922	B	PREDICTED: LOW QUALITY PROTEIN: 10 kDa heat shock protein, mitochondrial-like	NA	476.858	-2.34451	0.762711	-3.07391	0.00211272	0.0236924	1172.85	115.138	82.2697	741.465	799.591	422.731	587.47	919.038	550.241	593.727	921.938	25.4076	334.84	0.00556376	219.387
CrematogasterSubCLCMeta_c3854	B	PREDICTED: peptidyl-prolyl cis-trans isomerase FKBP8 isoform X1	NA	400.44	-2.3432	0.827686	-2.83102	0.00463993	0.0435427	646.28	25.488	39.5557	1120.13	22.413	494.79	257.572	794.105	304.67	1340	933.96	51.9135	66.9518	34.5047	80.4806
CrematogasterSubCLCMeta_rep_c35944	B	PREDICTED: general transcription factor II-I repeat domain-containing protein 2B-like	NA	760.42	-2.34084	0.484489	-4.83156	1.35467e-06	4.94274e-05	708	233.149	254.289	2548.21	1110.43	48.7058	1320	1101.98	1453.39	799	295.606	294.608	1189.96	205.515	346.901
CrematogasterSubCLCMeta_rep_c12095	B	PREDICTED: CCR4-NOT transcription complex subunit 7	NA	1012.9	-2.33995	0.427303	-5.47609	4.34825e-08	2.36449e-06	1742.56	129.588	327.232	1711.44	1387.36	486.902	1515.59	1983.61	2112.4	1928.41	833.898	216.405	682.346	528.789	146.54
CrematogasterSubCLCMeta_rep_c39137	B	PREDICTED: mitochondrial inner membrane protein COX18	NA	36.3587	-2.33985	0.566787	-4.12826	3.65518e-05	0.000850869	66.2047	6.49162	0	29.828	96.3292	7.61741	49.0726	43.6173	53.1305	59.8417	51.7365	26.31	61.4051	5.13091	22.0696
CrematogasterSubCLCMeta_c33689	B	PREDICTED: uncharacterized protein LOC105258591	NA	620.248	-2.33962	0.731479	-3.19848	0.00138154	0.016988	502.42	120.056	499.327	833.359	490.964	1.08248	523.077	2352.14	1949.66	498.264	658.834	209.578	642.742	111.325	217.265
CrematogasterSubCLCMeta_s60090	B	PREDICTED: uncharacterized protein LOC108769228 isoform X2	NA	333.376	-2.3392	0.382967	-6.10811	1.00818e-09	8.3274e-08	408.225	104.352	88.4548	488.38	482.797	67.6824	707.058	355.219	490.161	751.724	519.519	228.847	473.147	36.2146	77.0316
CrematogasterSubCLCMeta_rep_c1417	B	PREDICTED: carnitine O-acetyltransferase isoform X1	NA	1405.1	-2.3382	0.450424	-5.19111	2.09042e-07	9.62016e-06	2881.89	126.986	487.281	1664.53	2266.02	572.13	2261.83	2331.58	2224.79	2072.37	1961.32	210.822	1891.85	128.304	1135.25
CrematogasterSubCLCMeta_rep_c31036	B	PREDICTED: microtubule-actin cross-linking factor 1 isoform X9	NA	8.40483	-2.33753	0.739786	-3.15973	0.00157913	0.0189537	12	0	6	22	5	0	11	15	11	19	10	1	11	1	8.3119
CrematogasterSubCLCMeta_rep_c26165	B	PREDICTED: ceramide kinase	NA	148.958	-2.3345	0.692625	-3.37052	0.000750276	0.0103853	368.315	70.4921	33.3244	238.759	201.83	12.0785	187.491	271.219	136.456	180.986	75.6131	72.4055	391.001	72.6851	0
CrematogasterSubCLCMeta_rep_c32476	B	PREDICTED: nuclear factor of activated T-cells 5 isoform X4	NA	2957.66	-2.33401	0.708382	-3.29485	0.000984741	0.0129569	3090.25	2514.05	153.117	3957.6	6769.14	969.958	4422.68	4329.63	5363.06	4550.76	3137.39	21.7293	5777.04	1050.74	197.376
CrematogasterSubCLCMeta_s44012	B	PREDICTED: WASH complex subunit 7	NA	346.674	-2.33369	0.408259	-5.7162	1.08929e-08	7.07111e-07	640.842	26.2524	38.781	600.686	633.572	204.663	379.62	535.292	433.793	570.26	545.446	101.287	490.072	134.168	132.947
CrematogasterSubCLCMeta_rep_c25431	B	PREDICTED: muscle segmentation homeobox-like	NA	219.843	-2.32326	0.652688	-3.55953	0.000371518	0.00590325	184.769	107.703	0	233.926	272.172	48.4462	241.952	410.28	236.613	293.667	903.024	90.6934	380.038	87.0428	52.6208
CrematogasterSubCLCMeta_rep_c2057	B	PREDICTED: E3 ubiquitin-protein ligase TRIM23-like	NA	3249.36	-2.31788	0.433951	-5.34134	9.22629e-08	4.61864e-06	1051.46	573.59	1341.1	7121.03	2834.65	922.608	4684.09	5492.33	6880.11	2538.04	4586.23	1086.22	10733.6	1201.44	900.126
CrematogasterSubCLCMeta_rep_c29908	B	PREDICTED: activin receptor type-1 isoform X2	NA	292.444	-2.3151	0.691358	-3.34863	0.000812128	0.0110908	443.291	34.4149	228.969	446.434	483.588	90.2669	522.893	233.219	554.655	627.902	146.65	137.196	617.173	0	65.8645
CrematogasterSubCLCMeta_s59847	B	PREDICTED: uncharacterized protein LOC105275443	NA	79.6915	-2.31469	0.703749	-3.28908	0.00100514	0.0131604	185.044	12.0993	63.4116	209.863	72.6407	0	100.542	161.789	93.816	167.187	38.256	16.5533	45.121	45	12.3739
CrematogasterSubCLCMeta_rep_c5701	B	PREDICTED: WEB family protein At5g16730, chloroplastic-like isoform X2	NA	242.814	-2.31331	0.412374	-5.60974	2.02628e-08	1.20888e-06	318.046	50.0241	61.8083	325.842	334.484	196.383	417.256	259.97	401.753	318.44	748.955	57.3813	352.197	25.4912	57.4721
CrematogasterSubCLCMeta_rep_c6034	B	PREDICTED: eukaryotic translation initiation factor 4E type 3-like	NA	159.294	-2.31081	0.754098	-3.06434	0.00218153	0.0242935	43.5671	63.6086	4.6712	172.475	126.343	138.339	288.092	64.2586	316.718	601.859	266.257	61.0907	375.276	3.76481	12.4017
CrematogasterSubCLCMeta_rep_c3195	B	PREDICTED: bestrophin-4-like	NA	296.505	-2.31018	0.824519	-2.80185	0.00508111	0.0467667	556.911	61.0001	40.691	432.539	296.649	343.727	318.341	307.151	271.661	979.373	388.094	0	552.238	5.95151	92.7589
CrematogasterSubCLCMeta_rep_c31548	B	PREDICTED: rho guanine nucleotide exchange factor 17 isoform X2	NA	218.637	-2.30906	0.786045	-2.93756	0.00330803	0.0335687	557.648	36.7085	41.7094	728.893	250.196	174.576	160.224	392.879	436.769	0	183.969	46.4103	304.997	53.2672	50.2625
CrematogasterSubCLCMeta_rep_c39875	B	PREDICTED: uncharacterized protein LOC105558604	NA	59.8015	-2.30387	0.700503	-3.28888	0.00100588	0.0131604	142.649	9	12.3458	177.504	75.3609	0	111.119	109.747	76.624	67	23.6404	15	25.537	51.7626	23.3924
CrematogasterSubCLCMeta_s52433	B	PREDICTED: transmembrane protein C5orf28 isoform X2	NA	205.934	-2.30309	0.385307	-5.97728	2.2689e-09	1.73699e-07	174.824	42.9468	60.2292	305.398	415.024	63.4377	490.685	275.308	410.516	443.995	134.601	53.8458	196.113	105.606	54.6845
CrematogasterSubCLCMeta_rep_c26494	B	PREDICTED: tRNA (guanine(10)-N2)-methyltransferase homolog isoform X1	NA	89.6501	-2.30258	0.578039	-3.98344	6.79249e-05	0.00143922	254.943	25.4847	26.8872	148.444	67.7948	75.6694	107.126	117.243	78.8591	140.623	184.106	19.0784	152.109	1.304	17.3919
CrematogasterSubCLCMeta_rep_c33644	B	PREDICTED: uncharacterized protein LOC105564436	NA	61.7134	-2.30109	0.819603	-2.80757	0.00499163	0.0461649	113.566	19.6723	28.7475	125.392	97.9279	0	156.63	75.1573	171.477	23.2597	1.14157	32.7234	92.1402	5.32383	29.1836
CrematogasterSubCLCMeta_rep_c37612	B	PREDICTED: uncharacterized protein LOC108771854	NA	26.6259	-2.30058	0.818125	-2.81202	0.00492318	0.045664	15	0	14	62	23	4	12.3174	25	15	59	10	16.4936	152.641	1	17.2591
CrematogasterSubCLCMeta_s44083	B	PREDICTED: Golgi apparatus protein 1	NA	1311.7	-2.29867	0.485411	-4.73551	2.18506e-06	7.45582e-05	2799.14	384.642	578.914	2162.64	1279.85	121.402	2227.44	2886.25	2101.56	1016.64	1170.45	195.741	2388.03	176.256	1043.08
CrematogasterSubCLCMeta_rep_c15063	B	PREDICTED: atypical protein kinase C isoform X5	NA	567.181	-2.2917	0.506656	-4.52319	6.09132e-06	0.000182272	701.245	346.946	162.574	848.913	829.304	17.6086	1103.34	522.378	954.329	347.552	1698.63	108.728	1158.86	165.281	222.421
CrematogasterSubCLCMeta_rep_c3409	B	PREDICTED: beta-amyloid-like protein isoform X1	NA	791.629	-2.29056	0.687258	-3.3329	0.000859463	0.0116106	1376.86	140.13	283.772	594.117	1950.16	743.478	210.609	68.7378	2471.31	1067.7	1680.67	108.854	2027.63	131.691	65.3273
CrematogasterSubCLCMeta_c24392	B	PREDICTED: uncharacterized protein LOC108782885	NA	99.1815	-2.29043	0.756098	-3.02928	0.00245141	0.0266545	136.386	15.8271	19.0872	81.7948	119.062	81.6329	72.5521	164.489	0	254.83	258.42	22.1391	306.377	15.6647	30.6412
CrematogasterSubCLCMeta_rep_c32990	B	PREDICTED: uncharacterized protein LOC105570554	NA	14.4248	-2.28852	0.681627	-3.35744	0.00078669	0.0108019	30.4714	3.32079	0	30.7003	22.6649	8.38196	27.3237	22.8281	2	5.64854	19.5998	5	39.2901	4	7.15105
CrematogasterSubCLCMeta_s57083	B	PREDICTED: uncharacterized protein LOC105680920	NA	44.0117	-2.28788	0.824652	-2.77436	0.00553109	0.0498923	25.3448	22.3241	25.6741	53.8185	62.4333	0	66.5457	36.9465	61.1129	196.085	55.3142	3.02042	50.7174	0	32.4233
CrematogasterSubCLCMeta_rep_c39784	B	NA	NA	35.2754	-2.2807	0.638091	-3.57426	0.000351226	0.00564258	83.7152	13.2465	18.4581	94.6499	41.5814	2.13706	83.1126	71.1046	52.2169	17.0069	24.1384	2	12.4638	17.042	14.1866
CrematogasterSubCLCMeta_rep_c1774	B	PREDICTED: bifunctional methylenetetrahydrofolate dehydrogenase/cyclohydrolase, mitochondrial	NA	237.452	-2.27451	0.726641	-3.13017	0.00174703	0.0205167	175.374	34.3575	130.329	254.677	204.794	198.174	257.58	611.198	218.093	160.056	1228.46	65.6097	298.743	1.20072	24.4269
CrematogasterSubCLCMeta_rep_c29697	B	PREDICTED: uncharacterized protein LOC105561273	NA	900.658	-2.26746	0.528107	-4.29356	1.7583e-05	0.000454586	515.333	134.875	175.813	1001.26	1050.41	818.371	1355.4	920.491	1734.7	2375.5	752.984	97.6473	2886.21	250.047	228.004
CrematogasterSubCLCMeta_rep_c2940	B	PREDICTED: uncharacterized protein LOC105459170	NA	1498.78	-2.26606	0.261207	-8.67535	4.12284e-18	1.37162e-15	3093.56	402.238	489.06	1424.71	2452.36	749.999	2049.6	2051.23	2814.81	2360.69	2396.32	294.466	2252.73	426.858	472.824
CrematogasterSubCLCMeta_rep_c22599	B	PREDICTED: uncharacterized protein LOC105457098	NA	65.4382	-2.26401	0.745074	-3.03864	0.00237648	0.026011	244	17	21	208.439	50	7	89.5791	17	47	135	3	32	97.594	5	45
CrematogasterSubCLCMeta_rep_c18201	B	PREDICTED: uncharacterized protein LOC105558604	NA	76.0375	-2.26011	0.456332	-4.95278	7.31607e-07	2.90382e-05	150.029	12.116	22.693	206.953	129.055	34.9949	108.888	85.6643	100.784	106.748	58.6666	4.7036	98.5557	44.6794	24.8278
CrematogasterSubCLCMeta_rep_c32162	B	PREDICTED: putative glutamate synthase	NA	3026.03	-2.25546	0.452528	-4.98414	6.22392e-07	2.529e-05	2737.51	960.805	935.091	4512.83	5947.94	1654.22	8652.61	1971.55	4732.71	7715.26	4577.55	424.758	1349.89	948.66	783.042
CrematogasterSubCLCMeta_c23337	B	PREDICTED: beta-amyloid-like protein isoform X1	NA	1595	-2.25508	0.606409	-3.71875	0.000200208	0.00355763	723.058	182.417	1155.65	1053.88	2481.6	939.416	4958.25	1552.01	3690.37	1071.46	4192.27	575.164	3218.04	58.7163	204.179
CrematogasterSubCLCMeta_c24072	B	uncharacterized protein Dyak_GE10732	NA	12.4833	-2.25371	0.796454	-2.82968	0.00465952	0.0436758	47.3757	0	0	10	12	5	13	28.8372	14	17	11	3	16.0175	1.47189	16.3655
CrematogasterSubCLCMeta_rep_c2709	B	PREDICTED: trichohyalin-like	NA	272.816	-2.24892	0.710438	-3.16554	0.00154797	0.0186468	1488.66	25.3143	111.824	42.6794	447.603	251.455	241.4	79.4728	590.365	322.573	229.433	69.9456	343.837	28.1366	43.0837
CrematogasterSubCLCMeta_rep_c2710	B	LOW QUALITY PROTEIN: uncharacterized protein LOC111330333	NA	1256.81	-2.24713	0.319245	-7.03889	1.93781e-12	2.63735e-10	2504.18	305.043	447.789	2061.19	1987.15	512.093	2426.34	2173.03	2029.38	876.782	1463.11	383.017	1847.32	186.541	605.225
CrematogasterSubCLCMeta_rep_c30897	B	PREDICTED: uncharacterized protein LOC105196630	NA	615.824	-2.24488	0.460799	-4.8717	1.10643e-06	4.15407e-05	884.113	36.5312	300.409	1481.45	841.19	204.072	1555.45	419.44	532.951	497.857	690.128	307.981	1746.97	158.04	209.845
CrematogasterSubCLCMeta_rep_c24260	B	PREDICTED: insulin-like growth factor I	NA	626.8	-2.24447	0.776685	-2.88981	0.00385479	0.0377486	422.025	84.8178	28.7584	340.935	4428.15	62.0084	217.147	736.602	474.276	1095.51	99.4019	266.377	849.021	470.326	298.643
CrematogasterSubCLCMeta_rep_c39524	B	PREDICTED: uncharacterized protein LOC108571913	NA	149.029	-2.24095	0.548889	-4.08271	4.45143e-05	0.00101021	314.219	4.63487	63.1038	100.383	214.85	122.009	147.288	149.997	306.363	83.7791	496.533	34.2567	330.744	30.2393	38.8742
CrematogasterSubCLCMeta_s44405	B	PREDICTED: XK-related protein 6	NA	34.6936	-2.24019	0.758006	-2.95537	0.0031229	0.0321256	92.2573	33.5947	10.3488	40.5667	60.0278	12.6018	56.9325	53.8727	34.3781	26.2764	65.1838	0	52.663	0	4.78345
CrematogasterSubCLCMeta_rep_c17820	B	NA	NA	17.2894	-2.23918	0.786153	-2.84827	0.00439575	0.0415605	70	14	7	22	19	0	5	20	20	13	54	0	20	4	7
CrematogasterSubCLCMeta_rep_c37585	B	PREDICTED: uncharacterized protein LOC105252810	NA	183.77	-2.23619	0.619818	-3.60782	0.000308777	0.00507987	247.848	68.1548	122.444	320.374	340.724	18.6015	314.466	250.774	176.578	227.559	436.982	59.7005	261.279	0	90.6899
CrematogasterSubCLCMeta_rep_c3319	B	PREDICTED: zinc finger FYVE domain-containing protein 16 isoform X2	NA	34.3327	-2.23485	0.590979	-3.78161	0.000155818	0.00289108	55.7759	14.4494	11.0493	52	64.4824	1.70567	54.5725	58.8428	45.9963	97	13	6.35072	20.5211	5.17688	29.3542
CrematogasterSubCLCMeta_rep_c32347	B	PREDICTED: glutathione S-transferase omega-1-like	NA	179.484	-2.23069	0.639414	-3.48865	0.000485461	0.0073598	319.007	2.98586	162.797	161.895	374.049	37.4214	409.904	123.384	448.536	221.872	232.491	8.27954	229.614	109.174	38.541
CrematogasterSubCLCMeta_rep_c34044	B	PREDICTED: copper-transporting ATPase 1 isoform X3	NA	42.0599	-2.2303	0.778999	-2.86303	0.00419614	0.0401728	76.7938	18.453	0	63.2398	88.6933	27.1926	40.9985	124.145	86.8452	20	43.3442	13.9688	25.6064	18.9773	0
CrematogasterSubCLCMeta_rep_c437	B	PREDICTED: alpha-protein kinase 1 isoform X4	NA	1888.3	-2.22357	0.754639	-2.94654	0.00321356	0.0328325	6938.89	143.483	2167.17	2335.75	3561.05	475.185	3540.44	4348.05	641.038	2867.95	158.589	221.11	637.261	198	649.563
CrematogasterSubCLCMeta_rep_c7764	B	PREDICTED: uncharacterized protein LOC105667593 isoform X1	NA	113.453	-2.22321	0.565282	-3.93292	8.39206e-05	0.00171564	207.912	42.195	36.031	200.524	211.279	0	153.282	181.231	96.339	92.0934	250.668	34.5317	190.006	68	37
CrematogasterSubCLCMeta_rep_c24235	B	PREDICTED: cystinosin homolog	NA	130.32	-2.22235	0.609152	-3.64827	0.000264014	0.0044851	210.468	16.425	74.6765	96.1227	292.201	54.6428	146.342	132.631	341.736	273.855	38.4804	66.5744	269.798	2.20722	46.1553
CrematogasterSubCLCMeta_rep_c38698	B	PREDICTED: protein arginine N-methyltransferase 5	NA	196.502	-2.22194	0.772232	-2.87729	0.00401101	0.0388184	182.553	54.316	15.5207	303.708	346.109	96.4911	242.741	68.9371	58.2101	331.175	996.145	143.718	337.987	0	73.2569
CrematogasterSubCLCMeta_s43163	B	NA	NA	347.199	-2.2163	0.506582	-4.37501	1.21425e-05	0.000329955	851.567	67.8542	123.019	330.387	795.641	248.823	450.651	340.6	655.314	299.725	194.548	158.937	906.685	40.0293	39.514
CrematogasterSubCLCMeta_s59810	B	PREDICTED: protein ERGIC-53	NA	838.047	-2.21558	0.651848	-3.39892	0.000676517	0.00957456	1457.98	369.51	244.269	209.89	251.756	618.91	2134.24	457.651	1062.81	974.589	2864.13	219.388	2697.07	48.8221	94.0332
CrematogasterSubCLCMeta_rep_c26223	B	PREDICTED: LETM1 and EF-hand domain-containing protein anon-60Da, mitochondrial isoform X2	NA	1123.05	-2.21552	0.354787	-6.24465	4.24754e-10	3.76131e-08	1711.11	423.493	259.879	1480.07	1622.62	809.632	1607.5	1805.36	1801.68	1475.39	2305.34	234.938	1844.3	214.86	205.872
CrematogasterSubCLCMeta_rep_c6239	B	NA	NA	340.424	-2.2112	0.505524	-4.37408	1.21946e-05	0.000330621	678.094	51.9772	41.6092	461.659	765.279	134.138	403.108	275.995	488.521	440.367	903.111	345.946	391.826	43.842	53.4821
CrematogasterSubCLCMeta_rep_c22340	B	PREDICTED: POC1 centriolar protein homolog A	NA	237.185	-2.21038	0.672828	-3.28522	0.00101904	0.0132877	325.862	179.409	203.544	244.238	458.4	25.0078	387.467	455.998	416.152	297.917	304.141	6.07279	381.284	10.5416	23.0702
CrematogasterSubCLCMeta_s43453	B	PREDICTED: F-box/WD repeat-containing protein 9-like	NA	114.704	-2.20642	0.761332	-2.89811	0.00375419	0.0369837	136.025	82.8602	16.8585	70.0687	286.866	0	232.247	67.4825	124.66	330.009	222.793	38.4338	133.613	69.0886	4.11097
CrematogasterSubCLCMeta_rep_c6231	B	PREDICTED: lymphocyte cytosolic protein 2-like	NA	162.925	-2.20545	0.786405	-2.80447	0.00503999	0.0465313	124.349	5.88706	0	186.493	305.827	59.6715	290.034	153.664	308.653	237.086	180	8.62062	502	176.824	69.2092
CrematogasterSubCLCMeta_rep_c38906	B	PREDICTED: putative nuclease HARBI1	NA	1052.92	-2.20491	0.498431	-4.4237	9.70229e-06	0.000272455	2041.61	368.759	295.161	1766.62	998.625	21.0286	1691.64	1928.13	1483.75	1689.32	1022.92	400.038	1739.65	523.099	451.552
CrematogasterSubCLCMeta_rep_c9008	B	PREDICTED: uncharacterized protein LOC105450208 isoform X1	NA	80.3752	-2.20199	0.637953	-3.45164	0.000557188	0.00821583	222.728	7.90706	38.7554	67.9749	110.865	0	115.279	68.6642	275.398	62.3371	79.3752	41.8579	119.921	26.7799	48.2487
CrematogasterSubCLCMeta_rep_c35610	B	PREDICTED: uncharacterized protein LOC105560886 isoform X2	NA	223.462	-2.20154	0.632516	-3.4806	0.000500284	0.00753446	92.1524	47.436	38.0113	154.726	694.789	18.489	273.158	517.956	666.193	73.3303	285.735	205.508	349.664	101.303	29.2932
CrematogasterSubCLCMeta_rep_c9343	B	NA	NA	16.6201	-2.19558	0.569379	-3.8561	0.000115211	0.00224549	11.6653	7	9	18.5853	10.8677	4	11	19	31.6837	32	74	5	29.3842	1	7.31184
CrematogasterSubCLCMeta_rep_c36118	B	PREDICTED: eukaryotic translation initiation factor 4 gamma 3 isoform X1	NA	6449.54	-2.19532	0.174779	-12.5605	3.48055e-36	6.41319e-33	9980.03	2020.53	1969.15	10571.9	8627.03	1707.14	8301.81	9514.21	8958.42	8922.09	14953.9	2090.54	10113.3	2448.45	2488.8
CrematogasterSubCLCMeta_rep_c11149	B	tRNA-splicing ligase RtcB homolog	NA	79.5293	-2.1945	0.430634	-5.09597	3.46961e-07	1.51921e-05	80.7239	17.0782	19.3903	62.6026	210.62	41.1199	138.025	50.8677	182.748	60	232.543	42.6284	121.978	16.2505	22.3741
CrematogasterSubCLCMeta_rep_c38990	B	PREDICTED: MLX-interacting protein isoform X2	NA	1215.17	-2.19307	0.577362	-3.79843	0.000145614	0.00272072	1912.84	105.213	524.062	1236.36	922.71	954.985	1198.3	2225.11	3468.02	158.773	2599.33	251.489	3411.27	274.409	339.684
CrematogasterSubCLCMeta_rep_c12050	B	PREDICTED: hemolymph lipopolysaccharide-binding protein-like	NA	21.7594	-2.18996	0.738221	-2.96654	0.00301176	0.0312101	40	8	19	10	39	0	41.7944	32	40	46	46	7	6	0	10
CrematogasterSubCLCMeta_rep_c39049	B	PREDICTED: probable U2 small nuclear ribonucleoprotein A'	NA	176.299	-2.18452	0.656809	-3.32597	0.000881128	0.0118142	78.4237	17.7409	123.962	359.227	22.2571	92.966	49.4128	326.323	451.961	253.032	228.722	40.8147	686.264	36.8402	47.347
CrematogasterSubCLCMeta_s43356	B	NA	NA	76.2036	-2.18231	0.585275	-3.72869	0.00019248	0.0034549	162.08	0	15.4824	72.9394	125.18	13.6419	146.82	41.3529	108.089	175.111	118.533	44.1226	110.225	45.452	37.5255
CrematogasterSubCLCMeta_s43799	B	PREDICTED: CD63 antigen	NA	2002.56	-2.18211	0.494101	-4.41631	1.00398e-05	0.000279964	1885.84	310.59	126.109	3635.57	4711.15	1660.29	2971.17	3188.48	2729.94	2923.23	1278.3	641.335	4128.89	496.419	774.024
CrematogasterSubCLCMeta_c37340	B	PREDICTED: serine/threonine-protein kinase MARK2-like isoform X7	NA	60.3736	-2.17749	0.741453	-2.93679	0.00331632	0.0336315	40.5933	27.3718	28.3783	0	80.1715	18.5516	41.4967	53.4329	57.7186	192	225.286	10.1056	171.635	9.97622	25.5378
CrematogasterSubCLCMeta_s43428	B	protein bunched, class 2/F/G isoform-like	NA	340.284	-2.17632	0.642872	-3.38531	0.000710989	0.00995073	635.162	30.6455	39.141	382.585	726.292	475.137	385.113	482.129	435.15	682.654	411.455	28.2901	528.217	80.783	21.765
CrematogasterSubCLCMeta_rep_c24343	B	PREDICTED: N-alpha-acetyltransferase 10	NA	1617.06	-2.17534	0.498932	-4.35999	1.30071e-05	0.000350467	3007.31	113.42	676.027	2862.53	2546	1650.25	2353	1905.93	2245	2877.85	2067.9	371.384	2383	242.877	224.781
CrematogasterSubCLCMeta_rep_c39843	B	PREDICTED: activating signal cointegrator 1 complex subunit 2-like isoform X2	NA	321.073	-2.17363	0.671717	-3.23593	0.00121249	0.015298	527.306	0	192.423	406.596	387.296	28.2847	627.002	515.791	285.328	369.408	825.785	107.861	532.89	110.875	238.911
CrematogasterSubCLCMeta_s57091	B	PREDICTED: cytochrome P450 6k1-like isoform X2	NA	320.609	-2.17141	0.635649	-3.41606	0.000635348	0.00912398	563.128	97.124	167.145	781.654	687.638	16.5694	469.168	273.062	386.231	660.505	14	190.83	520.972	96.2367	78.4515
CrematogasterSubCLCMeta_s43446	B	PREDICTED: uncharacterized protein LOC105450731	NA	163.004	-2.16895	0.659315	-3.28971	0.00100292	0.0131383	202.283	0	58.7788	116.749	363.682	31.2182	593.114	270.185	171.799	210.117	4982.26	78.6236	121.172	51.1682	122.895
CrematogasterSubCLCMeta_rep_c33712	B	PREDICTED: LOW QUALITY PROTEIN: tissue inhibitor of metalloproteases	NA	446.11	-2.16472	0.653244	-3.31379	0.000920399	0.0122516	1254.94	140.663	249.62	625.308	197.6	21.6506	56.179	829.83	307.569	620.888	825.754	128.203	1416.98	284.9	66.2775
CrematogasterSubCLCMeta_rep_c5002	B	PREDICTED: replication factor C subunit 1	NA	4036.8	-2.16163	0.61232	-3.53023	0.000415203	0.0064792	8077.16	1432.03	1310.59	3460.37	4896.33	2005.46	5288.31	11721.5	7439.37	4994.73	2423.48	57.9165	5779.91	492.221	2921.83
CrematogasterSubCLCMeta_rep_c23496	B	PREDICTED: clusterin-associated protein 1 isoform X1	NA	43.3414	-2.16004	0.630547	-3.42565	0.000613323	0.00888081	33.2433	0	12.9677	114.85	120.435	13.1054	61.2156	21.4478	83.4972	100	34.4178	18.8386	30.1327	32.3175	11.8811
CrematogasterSubCLCMeta_rep_c16819	B	PREDICTED: YEATS domain-containing protein 4	NA	70.2015	-2.15846	0.576445	-3.74444	0.000180794	0.00328526	94	23.2319	16.0306	131	106	0	98	96	115	45.9783	184	57.1642	116	11.8991	34.8523
CrematogasterSubCLCMeta_rep_c16696	B	PREDICTED: antichymotrypsin-2-like isoform X10	NA	354.303	-2.15811	0.576648	-3.74251	0.000182191	0.0033049	1158.71	117.052	100.171	120.277	132.207	40.4464	637.35	1072.66	529.494	199.032	394.976	224.644	512.949	113.172	120.202
CrematogasterSubCLCMeta_c34613	B	PREDICTED: ATP-dependent RNA helicase DDX42	NA	332.563	-2.1568	0.378167	-5.70332	1.17498e-08	7.53543e-07	420.085	67.6884	136.984	417.752	593.144	113.206	299.897	355.23	533.696	366.245	1402.24	184.254	370.62	53.5019	128.128
CrematogasterSubCLCMeta_s43778	B	NA	NA	73.8885	-2.15646	0.742989	-2.90241	0.00370305	0.0365992	77.7013	0	44.0674	125.447	97.2545	0	110.614	96.1822	100.833	177.997	177.849	46.6623	59.411	38.2986	26.2414
CrematogasterSubCLCMeta_s56909	B	PREDICTED: uncharacterized protein LOC108764234 isoform X1	NA	710.296	-2.15341	0.731467	-2.94397	0.00324035	0.033064	825.433	17.0823	346.289	803.154	347.384	510.238	1042.93	709.5	1080.61	1092.43	2803.46	13.0399	1442.75	528.294	35.8127
CrematogasterSubCLCMeta_rep_c29750	B	PREDICTED: cAMP-specific 3',5'-cyclic phosphodiesterase, isoform F isoform X9	NA	1295.56	-2.15165	0.504474	-4.26513	1.99788e-05	0.000504813	817.854	50.9365	805.783	2113.03	2014.59	129.149	1662.47	2652.6	1997.37	2109.72	3033.76	455.824	1483.17	497.83	808.887
222-PAT-Cr-FB2_PF_(paired)_contig_4320	B	PREDICTED: BTB and MATH domain-containing protein 43-like	NA	748.51	-2.14964	0.75228	-2.8575	0.00426998	0.0406197	704.275	16.2677	7.66195	1814.91	1791.52	336.192	895.724	594.46	943.307	1834.42	861.748	442.681	842.055	671.498	41.1265
CrematogasterSubCLCMeta_rep_c32354	B	PREDICTED: uncharacterized protein LOC105565685 isoform X1	NA	506.525	-2.1464	0.567571	-3.78174	0.000155738	0.00289072	1208.58	113.685	126.618	1320.12	1347.19	39.1756	1291.05	392.534	219.897	374.419	282.627	212.008	476.095	357.644	182.278
CrematogasterSubCLCMeta_rep_c38274	B	PREDICTED: uncharacterized protein LOC109610707	NA	35.0718	-2.14635	0.609653	-3.52062	0.00043054	0.00666893	13.7507	15	8.67189	84.6116	72.8625	1	71.8511	37.4417	31.7983	31	17.7725	9	123.709	17.3469	19.9168
CrematogasterSubCLCMeta_s57063	B	PREDICTED: lysosomal alpha-glucosidase-like	NA	415.293	-2.14301	0.466187	-4.59689	4.28838e-06	0.000133926	484.822	143.032	34.0206	588.175	675.848	183.533	629.375	406.508	479.366	708.796	1003.7	32.6855	841.939	289.053	147.041
CrematogasterSubCLCMeta_rep_c4785	B	PREDICTED: cell division cycle 7-related protein kinase	NA	45.0401	-2.13846	0.625087	-3.42105	0.000623795	0.00900125	48	7.98925	15.7973	267.676	45.1529	28.4546	25.7067	37.9647	48.6573	14	37.158	19.4173	92.7659	8.73799	12.6923
CrematogasterSubCLCMeta_s52259	B	PREDICTED: ubiquitin conjugation factor E4 B	NA	194.844	-2.13384	0.696142	-3.06524	0.00217497	0.0242542	477.493	55.0025	0	365.07	303.929	24.9904	402.554	191.443	270.539	354.534	127.005	53.5309	149.85	169.885	91.2918
CrematogasterSubCLCMeta_s43729	B	PREDICTED: clathrin heavy chain	NA	3000.3	-2.13161	0.763399	-2.79226	0.0052341	0.0478257	5537.19	1600.99	1510.88	3261.69	5096.6	0	3920.38	5340.66	4760.98	2454.92	3852.61	1043.14	7047.91	729.412	1207.27
CrematogasterSubCLCMeta_s60318	B	PREDICTED: uncharacterized protein LOC105459876	NA	117.252	-2.12937	0.72417	-2.94042	0.00327763	0.0333379	67.6561	50.598	0	206.758	254.71	16.7473	187.204	151.673	179.46	273.364	222.71	111.364	70.2361	7.4068	52.6254
CrematogasterSubCLCMeta_c2933	B	PREDICTED: uncharacterized protein LOC105571140, partial	NA	49.2068	-2.12669	0.591601	-3.59481	0.000324632	0.00528805	67.2249	10	50	82.5857	77	23	55	28.2421	51	164	68	8.49198	83	1	11.6378
CrematogasterSubCLCMeta_s54123	B	PREDICTED: 26S proteasome non-ATPase regulatory subunit 13	NA	2061.68	-2.12336	0.714855	-2.97033	0.00297479	0.0309744	4238.54	432.373	1379.79	2804.09	2017.24	1382.25	3301.62	3614.31	4020.6	5132.55	365.507	1002.85	2031.81	47.928	48.5377
CrematogasterSubCLCMeta_s56958	B	PREDICTED: nesprin-1	NA	555.199	-2.12227	0.601495	-3.52833	0.000418192	0.00651311	609.549	171.568	323.852	645.514	651.385	102.243	778.195	682.525	1176.41	14.7939	1460.37	128.225	1884.3	214.647	214.435
CrematogasterSubCLCMeta_rep_c30376	B	PREDICTED: afadin- and alpha-actinin-binding protein-like	NA	99.9334	-2.12207	0.650872	-3.26035	0.00111276	0.0143035	66.2602	19.3644	18.9946	88.5207	221.151	0	149.224	71.0204	201.227	182.591	306.47	39.3404	130.644	31	106.213
CrematogasterSubCLCMeta_rep_c12617	B	PREDICTED: ragulator complex protein LAMTOR4 isoform X1	NA	182.138	-2.11952	0.628297	-3.37343	0.000742384	0.0102939	245	71.7748	89.0109	428.924	121.024	0	227.653	264	320.982	401.971	156	106.921	303.711	46	62.5265
63-PAR-Cr-FB2_PF_(paired)_contig_26682	B	dopamine beta-hydroxylase	NA	136.011	-2.11921	0.752758	-2.81527	0.00487368	0.0452663	128	39	46	6	186	5	427	521	316	65	74	37	84	91	64
CrematogasterSubCLCMeta_rep_c4221	B	PREDICTED: TBC1 domain family member 10A-like	NA	163.564	-2.11902	0.687619	-3.08167	0.00205841	0.0232667	296.993	30.7731	85.0529	295.217	253.336	0	308.167	194.832	87.4258	336.385	205.128	48.7829	253.135	153.707	18.8295
CrematogasterSubCLCMeta_s55622	B	PREDICTED: splicing factor 3A subunit 3	NA	211.333	-2.11817	0.635894	-3.331	0.000865332	0.0116644	203.23	99.0811	92.7201	260.398	235.441	67.5334	137.234	331.569	353.69	316.167	566.493	0	554.587	114.274	53.5171
CrematogasterSubCLCMeta_rep_c39720	B	PREDICTED: uncharacterized protein LOC105556751	NA	351.912	-2.11587	0.486587	-4.34839	1.37138e-05	0.000367032	695.368	85.8096	204.55	832.649	575.545	31.1786	381.31	512.424	432.493	593.299	137.426	72.417	583.843	233.414	107.186
CrematogasterSubCLCMeta_rep_c3527	B	PREDICTED: uncharacterized protein C630.12	NA	177.403	-2.11571	0.658956	-3.21071	0.00132408	0.0163952	214.527	65.5724	31.2005	345.622	315.535	124.053	175.879	218.4	249.959	409	240.679	132.301	255.108	1.99473	6.38253
CrematogasterSubCLCMeta_s54258	B	PREDICTED: poly(U)-specific endoribonuclease homolog	NA	5407.49	-2.11391	0.716834	-2.94895	0.00318853	0.0326047	18600.5	1451.59	941.892	12833.8	6240.88	3545.24	11579.1	2450.79	15153.2	4777.23	490.376	3431.28	1283.43	334.254	1515.34
CrematogasterSubCLCMeta_rep_c39288	B	PREDICTED: uncharacterized protein LOC105197995	NA	133.892	-2.11288	0.524598	-4.02763	5.63423e-05	0.00122885	232.185	2.30756	69.5143	196.574	222.053	44.2898	243.546	234.737	226.729	93.0477	213.502	32.1756	174.997	26.1135	119.117
CrematogasterSubCLCMeta_rep_c24591	B	PREDICTED: OTU domain-containing protein 5 isoform X1	NA	546.164	-2.10956	0.370131	-5.69948	1.20172e-08	7.67613e-07	649.294	141.759	199.033	589.74	1094.04	270.064	895.451	311.304	691.736	826.49	1959.8	123.823	753.444	275.618	120.242
CrematogasterSubCLCMeta_s43187	B	PREDICTED: extensin-like, partial	NA	61.8136	-2.10386	0.707445	-2.97388	0.0029406	0.0306651	94.0294	0	20.0687	242.249	90.9282	33.7384	33.9012	54.784	147.973	81.349	94.8047	19.336	7.3543	26.8679	33.3735
CrematogasterSubCLCMeta_c3034	B	PREDICTED: THAP domain-containing protein 1-like	NA	73.4508	-2.10348	0.627047	-3.35458	0.00079485	0.0109046	54	41	15	101.434	208.988	0	70.5851	83	148	111	64.0962	50	173.311	12	33
CrematogasterSubCLCMeta_s43743	B	PREDICTED: pheromone-binding protein Gp-9-like	NA	2631.23	-2.10331	0.726893	-2.89357	0.00380894	0.0373541	5962.76	437.353	537.405	4090.37	5036.65	82.1455	3798.84	4877.36	3795.03	5886.77	86.4654	1865.85	1323.97	597.81	2161.98
CrematogasterSubCLCMeta_s52602	B	PREDICTED: hypoxia up-regulated protein 1 isoform X3	NA	2155.62	-2.10211	0.358408	-5.86513	4.48782e-09	3.22795e-07	4049.54	453.377	900.418	3202.02	2539.35	1529.2	4094.88	3725.9	2456.5	2080.27	3293.8	770.996	4055.01	307.343	583.858
CrematogasterSubCLCMeta_rep_c25179	B	PREDICTED: threonine--tRNA ligase, cytoplasmic	NA	936.028	-2.09753	0.234464	-8.94608	3.68323e-19	1.48279e-16	1345.09	345.575	395.837	1194.36	1162.73	241.717	1164	1495.17	1270.45	1291	2508.79	405.68	1560.37	237.013	333.174
CrematogasterSubCLCMeta_rep_c21880	B	PREDICTED: solute carrier family 15 member 1 isoform X2	NA	995.359	-2.09571	0.317429	-6.60214	4.05268e-11	4.47355e-09	927.032	196.64	352.067	1356.77	2354.69	304.262	1042.74	1719.02	1166.25	2052.82	1443.01	248.423	1503.52	516.36	497.733
CrematogasterSubCLCMeta_rep_c36438	B	PREDICTED: bromodomain adjacent to zinc finger domain protein 1A isoform X3	NA	470.377	-2.09403	0.422409	-4.95735	7.146e-07	2.84575e-05	421.598	179.061	217.58	323.365	651.737	109.224	1022.24	445.093	746.792	546.741	1959.28	285.411	601.683	83.714	109.623
CrematogasterSubCLCMeta_s59937	B	PREDICTED: uncharacterized protein LOC105561616	NA	307.25	-2.09233	0.70904	-2.95094	0.00316809	0.0324511	179.609	183.499	23.189	207.691	465.822	109.07	563.351	181.887	653.672	17.8584	1947.13	172.766	329.72	45.9399	91.4043
CrematogasterSubCLCMeta_rep_c622	B	PREDICTED: uncharacterized protein LOC105675819	NA	129.98	-2.09128	0.502715	-4.15997	3.18286e-05	0.000752623	267.547	57.2262	44.7704	232.618	199.625	5	195.469	116.808	159.362	156	249	102.535	222.173	44.7166	13.6677
CrematogasterSubCLCMeta_c12624	B	PREDICTED: proteasome subunit alpha type-6-like	NA	1166.33	-2.09094	0.527096	-3.9669	7.28132e-05	0.00152659	2335.4	50.4798	138.299	1826.77	2051.87	1176	1106.12	1795.09	1741.08	1940.64	1199.8	466.277	1826.67	335.227	316.749
CrematogasterSubCLCMeta_rep_c3181	B	PREDICTED: guanine nucleotide-binding protein subunit beta-5	NA	133.899	-2.08542	0.368834	-5.65409	1.56671e-08	9.65974e-07	102.532	60.4889	37.8541	180	242.843	53.9792	262	202	288	97	310	69.8901	180	20.5607	35.5992
CrematogasterSubCLCMeta_rep_c9539	B	NA	NA	46.9512	-2.08176	0.69008	-3.01669	0.00255552	0.0275055	38.8684	25.0232	2.99164	21.1347	42.3838	16.5572	112.428	27.0347	99.5224	78.8705	153.425	14.299	95.3886	0	39.9464
CrematogasterSubCLCMeta_rep_c34023	B	PREDICTED: uncharacterized protein LOC105255138	NA	1980.46	-2.08148	0.609109	-3.41725	0.000632581	0.00909611	3487.2	1706.66	234.727	2545.08	3752.01	47.947	2303.66	5262.01	3354.92	2596.31	2020.13	617.313	1113.53	710.078	631.11
CrematogasterSubCLCMeta_rep_c40147	B	PREDICTED: cytochrome P450 4C1-like, partial	NA	237.391	-2.08138	0.532633	-3.90773	9.31688e-05	0.00186989	368.72	147.837	100.83	248.364	496.954	15	301.103	341.626	682.028	338.558	133.611	61.9168	319.807	21.5924	148.991
CrematogasterSubCLCMeta_rep_c26019	B	PREDICTED: uncharacterized protein LOC107265041 isoform X2	NA	10.7387	-2.08129	0.652294	-3.19072	0.00141918	0.0173484	8	3	10	21	12	5	7	15	10	38	21	3	14	0	2
CrematogasterSubCLCMeta_s43937	B	PREDICTED: axin isoform X4	NA	82.9495	-2.07766	0.664868	-3.12493	0.00177849	0.0207648	97.8381	33.2071	69.9095	221.194	131.8	36.9342	74.6655	67.5137	62.3995	284.283	75.5278	15.2509	102.379	0	21.7641
CrematogasterSubCLCMeta_s43145	B	NA	NA	946.81	-2.07715	0.383629	-5.41449	6.14621e-08	3.22152e-06	1799.5	190.053	632.882	1220.92	2195.03	80.1402	1353.67	882.313	1657.88	1111.25	1365.14	351.943	1480.34	309.575	500.341
CrematogasterSubCLCMeta_rep_c40149	B	PREDICTED: probable serine/threonine-protein kinase DDB_G0277165 isoform X1	NA	85.1635	-2.07614	0.604047	-3.43705	0.000588091	0.00858692	107.479	17.3063	53.3785	134.864	152.3	2.06373	102.537	207.323	218.941	111.717	19.7387	26.0572	80.6936	57.751	27.4801
CrematogasterSubCLCMeta_rep_c23394	B	PREDICTED: phosphoglycolate phosphatase-like	NA	225.472	-2.07177	0.515841	-4.0163	5.91199e-05	0.00127954	233.579	67.1218	15.4238	95.1403	584.383	97.8777	428.47	467.168	121.413	449.414	243.464	71.9372	425.353	94.3808	133.864
CrematogasterSubCLCMeta_rep_c33468	B	PREDICTED: aromatic-L-amino-acid decarboxylase	NA	269.678	-2.07107	0.503622	-4.11236	3.91637e-05	0.000902461	113.581	47.9008	67.1894	466.954	82.0559	87.3705	829.956	248.739	450.976	484.045	763.775	137.204	328.087	66.7629	182.197
CrematogasterSubCLCMeta_s52755	B	NA	NA	274.595	-2.06829	0.395423	-5.23057	1.68988e-07	7.96824e-06	279.991	102.681	105.665	274.991	287.638	78.4063	448.715	379.735	1015.46	406.615	336.902	150.975	345.747	101.09	39.9991
CrematogasterSubCLCMeta_rep_c35748	B	PREDICTED: tetratricopeptide repeat protein 21B-like	NA	92.0387	-2.06783	0.494846	-4.17873	2.93146e-05	0.000700086	104.397	6.37927	85.4748	192.668	114.703	40.8506	150.081	65.2513	240.351	113.353	168.134	34.5374	133.395	7.66185	28.8297
CrematogasterSubCLCMeta_rep_c38030	B	PREDICTED: venom acid phosphatase Acph-1-like isoform X1	NA	266.52	-2.06621	0.368565	-5.60609	2.06949e-08	1.23312e-06	461.185	94.4061	187.846	296.901	279.136	81.8519	271.116	477.402	483.942	411.251	253.567	49.0045	685.857	82.3561	75.5028
CrematogasterSubCLCMeta_rep_c7779	B	PREDICTED: pre-mRNA-splicing factor SLU7	NA	234.98	-2.06252	0.360732	-5.71761	1.08034e-08	7.02247e-07	360	50.4649	48.1413	217	343	149.955	299	291	334	504	510.303	142.616	378	61.5458	49.8764
CrematogasterSubCLCMeta_rep_c5331	B	PREDICTED: mitochondrial intermediate peptidase	NA	128.019	-2.05764	0.635034	-3.24021	0.00119443	0.0150981	13.8839	46.8891	20.045	239.122	139.329	90.3351	94.6462	135.069	218.594	179	661.639	77.5335	155.427	21.1021	13.6364
CrematogasterSubCLCMeta_rep_c23338	B	PREDICTED: uncharacterized protein LOC108783085	NA	629.886	-2.0573	0.737674	-2.7889	0.00528877	0.0482149	1143	238.689	190.236	965.924	709.438	271.692	741.648	804.632	504.681	539.136	2750.66	111.886	723.318	0	562.495
CrematogasterSubCLCMeta_rep_c31953	B	PREDICTED: acyl-CoA Delta(11) desaturase-like	NA	1363.85	-2.05638	0.605521	-3.39605	0.000683656	0.00965564	2222.68	162.074	494.651	4095.44	1547.96	1558.92	2016.65	2306.18	1733.3	2963.5	642.034	146.106	537.936	319.34	268.12
CrematogasterSubCLCMeta_s44001	B	PREDICTED: signal recognition particle subunit SRP72	NA	548.451	-2.05546	0.491729	-4.18006	2.91434e-05	0.00069704	1263.27	87.4094	212.47	1325.79	900.207	250.952	947.434	959.51	547.779	286.952	1081.54	160.474	127.609	315.094	162.513
CrematogasterSubCLCMeta_rep_c29496	B	gastrula zinc finger protein XlCGF57.1-like isoform X1	NA	68.8924	-2.05466	0.658582	-3.11983	0.00180958	0.0210212	79	32	14	132	26	0	59	52	75	205	128	18	192	38	45
CrematogasterSubCLCMeta_rep_c29788	B	PREDICTED: 60S ribosomal export protein NMD3	NA	1527.01	-2.05462	0.375087	-5.47771	4.30874e-08	2.34833e-06	2663.78	518.763	235.485	2472.81	2084.02	476.513	2123.1	2406.92	2166.58	1868.38	3408.24	1216.41	1745.95	234.093	600.498
CrematogasterSubCLCMeta_rep_c39381	B	PREDICTED: choline/ethanolamine kinase isoform X2	NA	378.751	-2.05423	0.715799	-2.86984	0.00410679	0.0395227	868.775	83.9148	483.412	340.414	792.158	53.2173	581.959	992.618	738.028	321.416	33.8773	146.279	342.432	12.6383	63.4372
CrematogasterSubCLCMeta_s52579	B	PREDICTED: 28S ribosomal protein S33, mitochondrial	NA	278.912	-2.05071	0.565122	-3.62879	0.00028475	0.00476309	256.959	91.2522	176.857	537.077	541.995	2.41413	403.821	443.733	430.932	441.818	329.914	123.752	400.313	154.892	51.9503
CrematogasterSubCLCMeta_rep_c38197	B	PREDICTED: TELO2-interacting protein 2-like	NA	426.363	-2.05049	0.337839	-6.06943	1.28362e-09	1.0418e-07	656.109	104.13	86.6355	583.272	714.962	107.4	642.207	440.929	763.266	894.31	447.171	120.288	667.163	299.704	201.694
CrematogasterSubCLCMeta_rep_c35426	B	PREDICTED: uncharacterized protein LOC105456325	NA	197.036	-2.04738	0.561189	-3.6483	0.000263986	0.0044851	409.993	12.1734	80.9628	117.283	237.124	72.9244	185.238	258.172	161.016	158.965	1155.32	53.31	139.099	95.9695	124.068
CrematogasterSubCLCMeta_s44580	B	PREDICTED: hydroxymethylglutaryl-CoA lyase, mitochondrial isoform X1	NA	116.832	-2.04469	0.484398	-4.2211	2.4311e-05	0.000596653	165.342	23.2622	4.15077	150.18	200.137	92.9405	147.522	115.455	280.396	180.432	251.979	60.9476	128.156	30.0125	41.663
59-PAR-Cr-FB2_PF_(paired)_contig_11205	B	NA	NA	49.3873	-2.04327	0.620109	-3.29502	0.00098416	0.0129538	97.896	17.1641	50.2973	17.8568	11.7402	3.89711	68.9872	70.7339	57.2086	139.352	142.108	12.7892	71.8593	6.80612	17.6699
CrematogasterSubCLCMeta_rep_c2158	B	PREDICTED: glycerol-3-phosphate acyltransferase 1, mitochondrial isoform X1	NA	4107.42	-2.04301	0.667011	-3.06294	0.00219175	0.024379	2183.5	1467.47	1311.51	4390.66	6139.49	125.44	7664.54	10766.3	12776.8	2216.81	572.643	1953.89	8532.29	864.691	3325.35
CrematogasterSubCLCMeta_s44702	B	PREDICTED: zinc finger protein 341-like	NA	118.798	-2.04287	0.700426	-2.91662	0.00353849	0.0353753	108.887	0	11.3576	129.126	285.089	20.8033	225.648	192.283	137.857	193.207	106.38	21.7409	233.904	101.749	109.846
CrematogasterSubCLCMeta_rep_c22654	B	PREDICTED: PMS1 protein homolog 1-like isoform X1	NA	41.8326	-2.04237	0.597757	-3.41672	0.000633808	0.00911007	29.5509	30.8699	8.75761	34.6636	49.6544	0	111.239	64.7234	39.675	58.1845	96	19.6598	92.9139	8.42553	19.6266
CrematogasterSubCLCMeta_rep_c31541	B	PREDICTED: forkhead box protein K1 isoform X2	NA	306.214	-2.04191	0.70768	-2.88536	0.00390968	0.0380694	325.177	53.7637	41.8395	154.607	1501.87	10.5072	383.833	561.463	51.2633	653.022	232.883	172.321	239.067	212.958	179.526
CrematogasterSubCLCMeta_s59536	B	NA	NA	217.134	-2.03945	0.706019	-2.88866	0.00386889	0.0378046	311.584	110.029	8.17911	411.724	389.487	88.7666	311.239	250.508	322.88	427.753	254.53	90.8189	265.461	0	170.777
CrematogasterSubCLCMeta_rep_c6718	B	PREDICTED: protein FAM50 homolog	NA	308.102	-2.03922	0.569915	-3.57811	0.000346091	0.00557317	327.434	180.972	48.721	254.517	215.895	251.084	178.826	485.941	526.654	677	1011.92	87.6135	602.768	17.6018	58.2122
CrematogasterSubCLCMeta_rep_c34347	B	PREDICTED: guanine deaminase	NA	237.026	-2.03796	0.409001	-4.98278	6.2678e-07	2.54252e-05	282.888	26.0371	35.0304	278.299	572.58	110.463	349.972	237.216	367.479	351.922	429.588	88.2646	404.387	188.236	68.7638
CrematogasterSubCLCMeta_rep_c32431	B	PREDICTED: receptor-type tyrosine-protein phosphatase F-like	NA	196.477	-2.03622	0.721112	-2.82372	0.00474698	0.0443475	230.254	26.7683	14.8088	78.704	918.044	50.8344	342.015	404.99	276.181	49.4084	61.5936	45.9699	294.533	244.484	39.2468
CrematogasterSubCLCMeta_rep_c38338	B	NA	NA	43.0125	-2.03463	0.434407	-4.68369	2.81749e-06	9.3281e-05	70.439	15.3253	26.18	52.924	64.6532	9.44698	40.3312	57.9015	79.7276	62.9379	97.5047	21.7452	65.7032	1.30358	21.6237
CrematogasterSubCLCMeta_rep_c35752	B	PREDICTED: uncharacterized protein LOC105559478 isoform X1	NA	901.003	-2.03365	0.434866	-4.6765	2.91814e-06	9.62805e-05	758.998	339.403	299.502	448.284	2081.36	490.546	2278.81	688.841	2313.39	959.362	2234.6	366.621	880.291	134.307	323.319
CrematogasterSubCLCMeta_rep_c11684	B	PREDICTED: uncharacterized protein K02A2.6-like isoform X2	NA	38.0069	-2.03109	0.73234	-2.77343	0.00554691	0.0499866	107.216	4.35604	17.2089	65.4	93.8193	0	28.4529	42.1435	39.2106	57	10.9704	12.1003	66.6598	44.8697	4.94669
CrematogasterSubCLCMeta_rep_c8215	B	NA	NA	58.4841	-2.029	0.719976	-2.81815	0.0048301	0.0449486	144.002	5	33	51.0006	107.002	25.4767	104.001	145.001	63	98.9715	0	27	53	11.0003	30.6267
CrematogasterSubCLCMeta_s43987	B	PREDICTED: uncharacterized protein LOC105565518	NA	340.288	-2.02833	0.666544	-3.04306	0.00234189	0.0257088	698.738	158.78	70.688	560.069	600.284	3.53505	460.049	780.474	465.884	508.4	50.0744	78.6927	362.335	134.526	296.99
CrematogasterSubCLCMeta_rep_c4095	B	PREDICTED: ubiquitin carboxyl-terminal hydrolase 36 isoform X2	NA	253.897	-2.02725	0.627688	-3.22971	0.00123917	0.0155772	339.284	117.124	182.603	242.59	286.65	71.7778	322.464	227.814	302.47	13.7116	1291.85	45.235	643.407	34.7141	104.074
CrematogasterSubCLCMeta_c36547	B	PREDICTED: LOW QUALITY PROTEIN: THAP domain-containing protein 5-like	NA	33.3993	-2.02496	0.634158	-3.19314	0.00140734	0.0172346	39.5145	5.91328	22.6554	48	85.3778	0	51.7273	22.704	40.6587	81.3125	31.7194	2.41428	53.3395	21.9436	21.8753
CrematogasterSubCLCMeta_rep_c37963	B	PREDICTED: beta-1,3-glucan-binding protein-like	NA	2069.15	-2.02483	0.612023	-3.30842	0.000938229	0.0124302	5503.07	726.672	1013.97	1631.14	2915.28	171.015	7363.21	2279.43	2414.17	397.427	5679.5	786.572	452.196	935.078	913.057
CrematogasterSubCLCMeta_rep_c24713	B	PREDICTED: ribonuclease H1-like isoform X2	NA	252.638	-2.02353	0.649324	-3.11637	0.00183092	0.0211972	32.7592	46.448	150.326	377.672	392.59	6.90951	567.229	367.855	710.305	614.036	243.208	124.467	108.762	148.25	87.5477
CrematogasterSubCLCMeta_rep_c26200	B	PREDICTED: tryptophan 2,3-dioxygenase isoform X1	NA	1192.12	-2.02283	0.549441	-3.68162	0.00023176	0.00401843	1088.71	741.474	242.907	606.747	1334.32	431.607	2051.58	1689.08	1405.69	765.644	7221.5	496.44	997.42	432.748	162.695
CrematogasterSubCLCMeta_rep_c36830	B	PREDICTED: zinc finger matrin-type protein 2	NA	2392.25	-2.01999	0.552986	-3.65287	0.000259326	0.00441804	5628.67	350.127	257.519	3437.58	5629.18	2877.3	4269.62	2059.5	2873.16	3458.08	3046.77	384.593	2120.19	302.979	1125.73
CrematogasterSubCLCMeta_s56906	B	PREDICTED: uncharacterized protein LOC105561357 isoform X4	NA	320.155	-2.01628	0.684799	-2.94433	0.00323652	0.0330319	52.7474	28.3264	279.492	190.162	752.784	120.173	459.244	211.169	35.0652	811.833	1407.6	91.1058	624.436	103.001	106.989
CrematogasterSubCLCMeta_rep_c34337	B	PREDICTED: 40S ribosomal protein S2	NA	1302.17	-2.01514	0.296757	-6.79056	1.11699e-11	1.36509e-09	1540.24	551.309	606.076	1359.95	1983.24	387.455	1638.2	1562.19	1856.36	1247.94	4711.99	484.854	2414.17	404.736	413.399
CrematogasterSubCLCMeta_rep_c32333	B	PREDICTED: teneurin-m isoform X3	NA	405.291	-2.01395	0.413991	-4.86472	1.14616e-06	4.28643e-05	248.264	59.3929	91.2208	424.298	537.773	301.262	524.327	574.371	1102.25	690.837	678.465	80.3866	794.535	183.333	187.667
CrematogasterSubCLCMeta_rep_c26733	B	PREDICTED: leucine-rich repeat protein 1-like	NA	143.494	-2.01343	0.681562	-2.95414	0.00313543	0.032206	184.976	37.4711	64.1072	125.838	217.211	140.032	175.798	205.475	206.912	124.896	500.677	62.5404	268.443	0	11.6202
CrematogasterSubCLCMeta_s56890	B	PREDICTED: uncharacterized protein LOC105459484	NA	454.662	-2.01234	0.702803	-2.8633	0.00419249	0.0401538	564.942	271.565	0	846.745	734.215	169.069	360.889	375.463	726.434	934.259	490.604	303.95	1180.81	108.478	113.82
CrematogasterSubCLCMeta_rep_c3395	B	PREDICTED: transmembrane protein 35	NA	387.498	-2.00855	0.595477	-3.37301	0.000743518	0.0103066	635.736	155.27	112.197	386.003	813.856	17.4099	460.804	441.352	62.1108	850.354	540.178	152.463	1083.32	316.977	87.3237
CrematogasterSubCLCMeta_rep_c30105	B	PREDICTED: spectrin alpha chain isoform X2	NA	2193.01	-2.00617	0.388153	-5.16849	2.35995e-07	1.07164e-05	2226.85	225.737	1000.87	2424.72	2104.18	935.907	2558.15	2646.51	3789.7	2659.72	7159.26	1454.24	5172.41	543.146	816.42
CrematogasterSubCLCMeta_s43941	B	PREDICTED: histone-lysine N-methyltransferase SETMAR-like	NA	612.884	-2.00377	0.668678	-2.99661	0.00273001	0.0289159	893.407	210.475	409.962	1324.13	531.112	1.57077	846.293	1242.07	644.837	359.367	599.461	395.66	1834.14	98.5868	263.395
CrematogasterSubCLCMeta_rep_c25398	B	PREDICTED: zinc finger protein jing	NA	1599.69	-2.0008	0.341251	-5.86314	4.54199e-09	3.25252e-07	1895.47	373.035	554.547	2113.36	2172.03	1106.34	3289.05	2169.08	3239.24	1000.36	4070.68	337.056	2224.9	573.747	625.119
CrematogasterSubCLCMeta_rep_c33920	B	PREDICTED: uncharacterized protein LOC101235804	NA	315.357	-1.99924	0.540167	-3.70114	0.00021463	0.00376365	83.5221	181.852	169.327	414.41	626.789	18.2174	449.15	145.956	806.327	667.387	672.195	121.267	531.893	69.2941	133.811
CrematogasterSubCLCMeta_rep_c37517	B	PREDICTED: uncharacterized protein LOC105277723	NA	8.58228	-1.99847	0.712514	-2.80482	0.00503452	0.0464987	12	0	5	21.2953	11	2	10	2	18	14	24	5	8	0	8.41482
CrematogasterSubCLCMeta_s44092	B	PREDICTED: alkaline phosphatase	NA	3567.75	-1.99656	0.422189	-4.72908	2.25541e-06	7.67944e-05	9508.85	1158.03	1910.51	6531.78	5028.32	1133.35	5724.71	2124.88	7661.02	5918.39	1487.35	1507.39	4092.83	670.757	1650.72
CrematogasterSubCLCMeta_s52877	B	NA	NA	92.277	-1.98708	0.553286	-3.59141	0.000328892	0.00534291	258.126	83.5177	27.159	89.7294	133.686	18.3658	154.769	156.531	123.974	82.9712	24.1415	18.7973	205.686	19.5181	28.3642
CrematogasterSubCLCMeta_rep_c39782	B	PREDICTED: cytochrome P450 4C1-like, partial	Cyp4s3 [Drosophila melanogaster] Dembeck Cytochrom P450	464.921	-1.98684	0.439628	-4.51937	6.20246e-06	0.00018456	791.532	230.966	125.572	535.074	940.69	202.936	544.689	670.525	1464.46	454.442	196.576	69.6353	681.387	170.009	224.676
CrematogasterSubCLCMeta_rep_c31113	B	PREDICTED: microtubule organizer protein 1-like	NA	194.24	-1.98326	0.469429	-4.22483	2.39121e-05	0.000588068	295.926	64.8208	35.09	262.545	317.999	8.86829	179.381	226.258	271.206	403.192	419.834	62.568	277.073	107.101	160.662
CrematogasterSubCLCMeta_rep_c24758	B	PREDICTED: uncharacterized protein LOC105558787	NA	238.32	-1.98195	0.427956	-4.63119	3.63566e-06	0.000116738	574.062	141.59	128.734	456.752	260.691	20.2929	443.716	292.022	218.994	324.493	379.601	52.4877	265.071	90.2422	92.7764
CrematogasterSubCLCMeta_rep_c25512	B	PREDICTED: zinc finger CCHC domain-containing protein 10	NA	140.729	-1.97539	0.499335	-3.95604	7.62024e-05	0.00158587	98.725	4.56704	53.2755	362.127	202.775	121.839	261.4	175.067	153.983	177.792	211.206	35.7201	271.585	69.3256	36.6534
CrematogasterSubCLCMeta_rep_c35463	B	PREDICTED: mitochondrial amidoxime reducing component 2	NA	1674.31	-1.97167	0.446349	-4.41732	9.99316e-06	0.000278953	2207.98	1059.98	1045.63	1917.41	2304.44	261.81	2740.73	4376.17	2653.4	2062.93	928.503	457.399	2964.07	334.561	553.924
CrematogasterSubCLCMeta_rep_c22542	B	PREDICTED: uncharacterized protein LOC105427884	NA	588.157	-1.9602	0.471598	-4.1565	3.2316e-05	0.000763017	1334.14	85.0852	104.973	645.677	1030.95	188.679	1035.8	964.912	784.796	1101.31	194.596	394.866	8323.88	362.403	213.122
CrematogasterSubCLCMeta_c38554	B	PREDICTED: mediator of RNA polymerase II transcription subunit 15	NA	1265.69	-1.95392	0.3534	-5.52891	3.22228e-08	1.81612e-06	2094.6	327.683	163.005	1863.5	1525.09	843.4	1551.47	2243.2	1584.23	2536.61	1891.87	629.455	1636.86	439.853	482.821
CrematogasterSubCLCMeta_rep_c28387	B	PREDICTED: peptidoglycan-recognition protein SC2-like	NA	1643.41	-1.94757	0.415436	-4.68802	2.75857e-06	9.17104e-05	4395.05	427.135	1018.25	1525.75	2640.27	136.901	2051.85	1561.14	1959.6	3006.7	2740.7	600.694	2361.76	527.976	1156.26
CrematogasterSubCLCMeta_rep_c2927	B	PREDICTED: probable elongation factor 1-delta isoform X3	NA	212.924	-1.94726	0.654503	-2.97517	0.00292824	0.0305628	439.845	177.531	34.9248	250.355	334.366	114.673	298.967	452.985	318.754	50.0767	275.333	71.2874	444.588	2.01941	63.503
CrematogasterSubCLCMeta_c34904	B	PREDICTED: plasma membrane calcium-transporting ATPase 2 isoform X2	NA	389.308	-1.9463	0.428551	-4.54159	5.58318e-06	0.00016886	930.849	128.437	151.097	193.126	266.399	96.2915	590.246	628.715	483.774	1157.09	370.091	187.581	529.142	128.389	208.976
CrematogasterSubCLCMeta_rep_c4525	B	PREDICTED: fibroblast growth factor 17-like isoform X1	NA	231.859	-1.94617	0.287868	-6.76064	1.37379e-11	1.64535e-09	369.856	48.0178	96.8216	220.18	488.664	59.0972	313.984	258.863	396.718	227.995	587.016	102.443	334.309	97.3587	139.393
CrematogasterSubCLCMeta_rep_c5232	B	NA	NA	28.1568	-1.94346	0.693524	-2.80229	0.00507413	0.0467384	33	13	8	60	28	10	37	73	34	73	7	27	19	0	6
CrematogasterSubCLCMeta_rep_c31121	B	PREDICTED: NADH dehydrogenase	NA	234.659	-1.94312	0.496891	-3.91056	9.20826e-05	0.00185275	614.315	159.938	66.3229	402.853	70.5091	114.687	254.136	191.657	205	400	445.029	41.0399	608.823	76.6061	59.5438
CrematogasterSubCLCMeta_s43706	B	PREDICTED: putative gamma-glutamylcyclotransferase CG2811 isoform X2	NA	1713.95	-1.94127	0.287104	-6.76158	1.36494e-11	1.63886e-09	2157.81	706.503	673.147	2239	1781.96	975.417	1980.66	2412.2	2536.42	2187.46	5320.22	431.187	3030.25	515.888	608.243
CrematogasterSubCLCMeta_c24947	B	NA	NA	934.746	-1.94032	0.537172	-3.6121	0.000303724	0.00501223	402.797	156.9	455.027	1949.2	298.821	304.504	319.479	1557.05	1658.05	1172.66	3998.92	396.626	1685.32	477.109	396.614
CrematogasterSubCLCMeta_rep_c38147	B	PREDICTED: Golgi resident protein GCP60	NA	790.819	-1.9391	0.621415	-3.12046	0.0018057	0.0210005	1221.61	236.478	124.382	1327.83	1726.95	61.9969	853.57	1184.97	698.839	790.117	2345.68	42.3015	668.107	1057.19	265.945
CrematogasterSubCLCMeta_rep_c5544	B	PREDICTED: ATP-dependent RNA helicase vasa	NA	329.848	-1.9386	0.691445	-2.80369	0.00505217	0.0465992	333.324	228.615	19.9701	452.743	596.357	269.046	431.874	283.745	330.198	341.628	524.256	81.9679	1257.34	2.25046	130.311
CrematogasterSubCLCMeta_s60068	B	PREDICTED: probable RNA-binding protein CG14230	NA	93.9289	-1.93816	0.460908	-4.20508	2.60989e-05	0.000633677	42.8143	10.0468	30.8094	108.745	171.292	53.6251	139.928	98.9508	131.985	236.016	276.547	63.5902	83.6232	21.9835	40.0104
CrematogasterSubCLCMeta_rep_c35416	B	PREDICTED: autophagy-related protein 9A	NA	74.7416	-1.93725	0.58804	-3.29442	0.000986237	0.0129659	98.1096	4.22312	60.5095	156.397	123.859	1.00944	126.452	124.757	84.8021	104	57.4499	31.7702	121.412	33.1257	48.5281
CrematogasterSubCLCMeta_rep_c40184	B	PREDICTED: uncharacterized protein LOC105558660 isoform X2	NA	503.879	-1.93689	0.385052	-5.03019	4.89996e-07	2.05915e-05	637.59	124.45	290.47	1055.61	784.347	161.644	724.825	652.426	525.146	1377.14	384.364	330.117	535.228	132.7	136.796
CrematogasterSubCLCMeta_rep_c36009	B	PREDICTED: protein FAM49B isoform X1	NA	127.528	-1.93591	0.449099	-4.31065	1.62777e-05	0.000424505	326.351	22.3211	54.8306	180.964	187.454	90.0012	167.554	100.125	80.7031	222.9	358.613	68.8074	117.988	17.4589	45.8312
CrematogasterSubCLCMeta_rep_c29660	B	PREDICTED: ribose-phosphate pyrophosphokinase 1-like isoform X1	NA	134.794	-1.93556	0.621982	-3.11192	0.00185875	0.0214468	278	46.371	3.76999	136	92	79.5155	117.459	601.434	93	95	194	48.2119	130.854	74.3407	55.0715
CrematogasterSubCLCMeta_rep_c1278	B	PREDICTED: eukaryotic initiation factor 4A-I	NA	1366.84	-1.93489	0.424214	-4.56112	5.08804e-06	0.000155753	1164.4	337.325	556.547	973.067	665.496	598.83	2805.64	1420.2	2184.88	1769.36	5998.98	761.145	2279.3	379.563	557.196
CrematogasterSubCLCMeta_s52586	B	PREDICTED: aminomethyltransferase, mitochondrial	NA	519.882	-1.93366	0.347721	-5.56096	2.68298e-08	1.54673e-06	845.344	278.337	130.923	534.036	362.893	129.542	1025.29	947.19	854.453	586.279	1305.53	232.726	601.999	159.576	251.61
CrematogasterSubCLCMeta_s54135	B	PREDICTED: hemolymph lipopolysaccharide-binding protein-like isoform X2	NA	226.973	-1.92963	0.518721	-3.71997	0.000199244	0.00354577	299.109	45.7776	156.45	268.228	333.141	9.90453	3634.76	324.202	260.489	181.041	807.128	202.164	440.145	53.5315	70.1034
CrematogasterSubCLCMeta_s33154	B	PREDICTED: UDP-glucuronosyltransferase 1-9-like	NA	1360.14	-1.9267	0.521208	-3.6966	0.000218508	0.00382465	2795.18	113.028	193.022	2698.08	1755.64	1277.85	1686.06	2342.23	1826.05	2205.91	462.663	458.423	2151.19	593.086	556.032
CrematogasterSubCLCMeta_rep_c23532	B	PREDICTED: facilitated trehalose transporter Tret1-2 homolog	NA	1107.13	-1.92351	0.644726	-2.98346	0.00285014	0.0299499	2224.88	160.521	1476.46	2300.34	1051.24	710.563	1796	1837.73	927.717	2638.45	1059.63	116.337	709.279	109.227	79.6923
CrematogasterSubCLCMeta_s43162	B	NA	NA	533.38	-1.92277	0.577969	-3.32676	0.000878606	0.0117969	849.798	81.6887	123.089	663.612	1396.74	760.206	338.512	973.511	444.656	477.996	808.444	74.0495	1236.72	95.3947	105.948
CrematogasterSubCLCMeta_s52822	B	PREDICTED: golgin subfamily A member 4-like	NA	923.88	-1.92096	0.554055	-3.4671	0.000526112	0.00783233	1264.61	113.6	902.691	596.969	1043.95	753.554	1453.35	711.63	1421.08	1745.02	2281.68	163.078	2230.74	194.639	67.1146
CrematogasterSubCLCMeta_rep_c22093	B	PREDICTED: 40S ribosomal protein S10-like isoform X2	NA	1140.12	-1.92086	0.352546	-5.44854	5.07863e-08	2.72455e-06	1762.65	527.493	589.357	1960.66	1639.59	112.065	2029.67	1523.61	1953.57	1207.56	1480.63	603.778	1820.16	273.072	552.377
CrematogasterSubCLCMeta_rep_c4561	B	PREDICTED: box C/D snoRNA protein 1 isoform X1	NA	1657.11	-1.9205	0.639061	-3.00519	0.00265412	0.0282746	3566	1416.85	168.241	706.493	2133	966.4	2163.73	2885.25	2774	3047.92	2624.64	83.1969	2300.31	81.6248	978.834
CrematogasterSubCLCMeta_s44847	B	PREDICTED: uncharacterized protein LOC105208112	NA	570.286	-1.92016	0.609645	-3.14964	0.00163472	0.0194812	585.581	58.676	105.636	1288.76	544.525	452.778	832.056	375.364	545.526	2059.18	438.098	33.4471	916.844	171.336	548.345
CrematogasterSubCLCMeta_s28380	B	PREDICTED: protein SZT2-like isoform X1	NA	2389.38	-1.91929	0.456384	-4.20542	2.60599e-05	0.00063341	3229.24	610.393	1551.98	3712.51	1040.45	539.825	2929.44	1761.29	2376.44	1856.97	10428.4	928.874	6443.86	983.608	1043.14
CrematogasterSubCLCMeta_rep_c8771	B	PREDICTED: putative nuclease HARBI1 isoform X1	NA	122.318	-1.91767	0.653685	-2.93364	0.00335017	0.0339225	160.8	11.2001	132.151	156.934	195.626	0	123.36	128.413	157.519	310.518	292.411	56.6044	135.055	49.2134	47.6978
CrematogasterSubCLCMeta_s57078	B	PREDICTED: fatty acid synthase-like	FASN2 [Drosophila melanogaster] mb FA synthase Chung 2014	986.289	-1.91611	0.688334	-2.78369	0.00537444	0.0488194	2190.65	128.336	150.934	2613.35	1630	33.336	1313.64	1190.83	440.415	2278.35	736.804	249.232	564.896	1423.08	305.808
CrematogasterSubCLCMeta_rep_c33017	B	PREDICTED: probable ubiquitin carboxyl-terminal hydrolase FAF-X	NA	738.249	-1.91459	0.583044	-3.28378	0.00102425	0.0133303	485.207	211.139	205.032	499.457	1474.46	321.754	1703.4	948.309	2184.38	854.797	618.705	51.6035	1250.24	69.0943	925.287
CrematogasterSubCLCMeta_rep_c7598	B	PREDICTED: collagen alpha-1(XIX) chain-like isoform X1	NA	890.78	-1.91445	0.654905	-2.92324	0.00346406	0.0348041	1583.45	130.75	88.0269	617.665	682.045	140.1	2447.1	1076.05	948.135	570.466	4377.26	283.027	175.794	742.605	734.69
CrematogasterSubCLCMeta_rep_c3617	B	PREDICTED: mono	NA	246.15	-1.91277	0.621929	-3.07555	0.00210115	0.0235928	325	166.821	114.317	349	355.937	0	340	268.099	338	322	698.321	87.7612	388.663	119.931	69.9026
CrematogasterSubCLCMeta_rep_c22582	B	PREDICTED: integrator complex subunit 2 isoform X1	NA	1607.75	-1.91177	0.524401	-3.64563	0.000266742	0.00452027	2796.23	266.971	479.354	1600.29	942.117	2004.48	2180.17	4386.03	2190.48	1876.19	2149.13	385.789	3147.66	247.259	395.823
CrematogasterSubCLCMeta_s43635	B	PREDICTED: putative nuclease HARBI1	NA	424.85	-1.91044	0.439899	-4.3429	1.40616e-05	0.000374665	579.496	140.642	259.367	571.016	925.336	16.1506	782.994	508.643	660.641	523.288	760.39	168.369	449.704	249.029	168.115
CrematogasterSubCLCMeta_rep_c26439	B	PREDICTED: E3 ubiquitin-protein ligase RNF169-like	NA	116.284	-1.9082	0.620375	-3.07589	0.00209876	0.0235853	87.7371	34.211	28.5765	128.109	234.564	5.99734	188.991	70.015	15.7544	230	439.272	56.1655	227.444	98.6367	48.1607
CrematogasterSubCLCMeta_rep_c13411	B	PREDICTED: uncharacterized protein LOC105565148 isoform X1	NA	148.9	-1.90789	0.394068	-4.84152	1.28848e-06	4.73006e-05	312.712	54.4678	111.541	208.448	203.522	32.3951	193.653	139.509	204.704	398.489	124.02	71.1494	194.164	29.4178	54.7012
CrematogasterSubCLCMeta_rep_c36886	B	PREDICTED: calcium/calmodulin-dependent protein kinase type II alpha chain isoform X6	NA	48.7503	-1.90592	0.549429	-3.46891	0.000522581	0.00779187	23.7254	4.8491	10.7275	102.098	92.8087	13.2548	102.79	30.6605	64.4608	84.3289	156.499	36.2197	16.1992	23.9743	27.8171
CrematogasterSubCLCMeta_rep_c23511	B	PREDICTED: lisH domain and HEAT repeat-containing protein KIAA1468 homolog isoform X1	NA	98.928	-1.90381	0.486574	-3.91268	9.12759e-05	0.00184038	105.314	52.4135	22.1	242.567	141.416	91.3267	144.336	85.9139	151.314	157.008	207.686	23.5447	109.98	6.24352	33.106
CrematogasterSubCLCMeta_c4926	B	PREDICTED: Y-box factor homolog isoform X3	NA	14730.6	-1.90334	0.413594	-4.60196	4.18534e-06	0.000131136	17647.4	3442.53	3122.45	34076.4	15015.2	15056.3	23526.9	20980.4	19272	28979.2	18068.2	3802.13	18668.6	5132.01	3948.95
CrematogasterSubCLCMeta_rep_c37183	B	PREDICTED: probable protein phosphatase CG10417	NA	370.274	-1.90325	0.379592	-5.01394	5.3327e-07	2.21765e-05	503.833	116.207	100.986	273.617	453.646	92.1685	498.175	364.727	496.878	506.958	1344.11	214.927	710.027	82.5261	277.658
CrematogasterSubCLCMeta_rep_c38923	B	PREDICTED: elongation factor Ts, mitochondrial isoform X1	NA	343.906	-1.90223	0.525074	-3.62278	0.000291452	0.00484308	257.601	110.961	15.5025	499.791	504	34.5627	625.956	568	600	281.445	740	311.872	607.857	165.771	168.884
CrematogasterSubCLCMeta_rep_c3271	B	PREDICTED: uncharacterized protein LOC105557086	NA	1013.9	-1.8959	0.427284	-4.4371	9.11801e-06	0.000258318	1826.66	412.174	780.406	1493.6	1355.83	104.175	1471.65	1522.37	1973.59	1957.56	924.706	416.025	915.732	164.89	553.733
CrematogasterSubCLCMeta_rep_c5260	B	uncharacterized protein Dyak_GE12729, isoform B	NA	171.015	-1.88772	0.539742	-3.49746	0.000469715	0.00715961	246.81	53.9743	63.7297	165.851	207.048	34.5885	207.951	187.551	166.28	106.394	863.601	13.8369	258.983	170.464	65.9615
CrematogasterSubCLCMeta_rep_c27392	B	PREDICTED: ethanolaminephosphotransferase 1-like	NA	1174.28	-1.88701	0.545837	-3.4571	0.000546022	0.00809352	1952.4	166.062	1117.18	1816.08	1486.87	169.474	1665.07	2211.15	2340.01	2595.78	193.4	551.055	1057.44	332.823	557.47
CrematogasterSubCLCMeta_rep_c32656	B	PREDICTED: polyadenylate-binding protein 4-like	NA	15645.5	-1.88494	0.393598	-4.78901	1.67609e-06	5.96557e-05	23145.2	4280.48	4786.23	10043.4	24060.4	13110.4	21891.7	31358.6	21641.7	26170.4	15273.4	6331.19	34239.8	5379.24	3118.76
CrematogasterSubCLCMeta_rep_c1005	B	PREDICTED: scavenger receptor class B member 1 isoform X2	NA	3244.35	-1.88427	0.613412	-3.07179	0.0021278	0.0238225	10472.3	1034.74	1710.08	5031.36	5660.26	849.079	3251.55	6911.74	6232.96	2497.61	210.952	1488.65	1869.66	523.666	2269.1
CrematogasterSubCLCMeta_rep_c37102	B	NA	NA	75.9511	-1.88423	0.583368	-3.22992	0.00123825	0.0155697	132.918	8.46798	5.51628	31.0307	90.2645	66.7814	96.7373	181.341	120.312	200.564	107	39.3788	35.1457	33.3712	28.9077
CrematogasterSubCLCMeta_rep_c4295	B	PREDICTED: major facilitator superfamily domain-containing protein 1-like	NA	551.542	-1.88272	0.543014	-3.46716	0.000525997	0.00783233	749.407	64.0446	48.3118	469.773	1284.13	542.545	408.547	1045.66	441.582	1089.46	511.712	332.846	1315.31	164.414	169.601
CrematogasterSubCLCMeta_rep_c3632	B	PREDICTED: icarapin-like	NA	21305.2	-1.88198	0.606567	-3.10267	0.00191782	0.0220065	48902.6	9915.7	7479.62	23733.1	19197.4	305.646	35921.7	55404.9	31311.2	21178.9	21145	3298.58	22054.3	13643.4	16034.6
CrematogasterSubCLCMeta_s60704	B	PREDICTED: zinc finger protein 253-like isoform X1	NA	64.5929	-1.88146	0.64533	-2.91551	0.00355111	0.0354793	34.9093	0	20.1243	85.4356	71.0337	63.9838	152.804	45.644	145.082	28.7155	195.396	27.868	145.083	24.4987	20.5535
CrematogasterSubCLCMeta_rep_c5019	B	PREDICTED: calcyphosin-like protein	NA	281.277	-1.88127	0.593062	-3.17214	0.00151322	0.0182835	512.224	47.8883	42.0659	155.744	180.588	212.131	295	213.993	335	368	1406.23	278.12	499.89	32.7356	61.9392
CrematogasterSubCLCMeta_rep_c35237	B	PREDICTED: uncharacterized protein LOC103575952	NA	246.1	-1.88101	0.509719	-3.69028	0.000224007	0.00390378	468.549	42.4173	183.387	257.95	520.015	12.4402	508.361	276.13	365.49	256.303	368.287	73.7253	300.146	52.2887	251.512
CrematogasterSubCLCMeta_rep_c1866	B	PREDICTED: uncharacterized protein LOC108726606 isoform X2	NA	122.71	-1.88049	0.533337	-3.52589	0.000422055	0.00656473	88.282	17.9725	48.0591	35.8826	196.353	96.9836	313.115	86.4517	319.867	274.447	127.774	31.9381	224.736	21.2986	84.2413
CrematogasterSubCLCMeta_s43692	B	PREDICTED: uncharacterized protein LOC105570598	NA	2526.63	-1.87881	0.34267	-5.48286	4.18512e-08	2.28616e-06	5293.83	1068	807.27	4063.8	3562.44	1253.01	3628.68	4688.69	2129.59	4623.95	1585.47	856.899	3502.76	990.476	997.562
CrematogasterSubCLCMeta_rep_c36151	B	PREDICTED: peptidyl-tRNA hydrolase 2, mitochondrial-like isoform X1	NA	88.7969	-1.87412	0.496531	-3.77443	0.000160374	0.00296529	105.288	12.9207	86.5159	168.288	42.3972	31.7837	84.004	99.6593	92.3719	195.514	259.779	50.1395	161.92	11.9459	25.2837
CrematogasterSubCLCMeta_s59986	B	PREDICTED: general transcription factor IIH subunit 1 isoform X1	NA	230.952	-1.87235	0.515303	-3.6335	0.000279605	0.00469015	334.664	98.6309	158.022	99.4248	252.241	12.6719	280.649	250.24	302.426	385.502	705.997	143.272	571.276	33.6124	112.159
CrematogasterSubCLCMeta_s43753	B	PREDICTED: lipid storage droplets surface-binding protein 2-like isoform X1	NA	4071.64	-1.87133	0.568969	-3.28898	0.00100551	0.0131604	5260.84	401.158	962.824	9870.11	7292.61	448.109	5290.74	3878.07	5323.07	7974.82	2991.57	1259.33	6289.83	808.574	6480.47
CrematogasterSubCLCMeta_s44663	B	NA	NA	87.1696	-1.86617	0.606943	-3.0747	0.00210712	0.0236407	131.414	22.8061	24.0698	201.425	84.2546	54.9432	135.251	167.152	93.8093	175.111	73.1914	55.5173	78.9765	0	54.6926
CrematogasterSubCLCMeta_rep_c4969	B	PREDICTED: pentatricopeptide repeat-containing protein PFL1605w-like	NA	151.89	-1.86593	0.666202	-2.80085	0.00509688	0.0468702	133.07	128.42	108.001	311.034	394.287	0	169.79	154.889	206.828	113.91	360.13	38.9628	234.027	40.085	38.2953
CrematogasterSubCLCMeta_s52414	B	PREDICTED: RNA-binding protein 4.1 isoform X2	NA	204.178	-1.86494	0.593782	-3.14078	0.001685	0.0199564	374.228	120.623	16.9645	297.589	397.574	26.8762	502.209	258.598	367.85	101.693	179.075	57.5857	252.723	20.3813	251.19
CrematogasterSubCLCMeta_rep_c39593	B	PREDICTED: uncharacterized protein LOC105459432	NA	66.117	-1.86458	0.581126	-3.20856	0.00133403	0.016497	256.03	23.7349	21.7438	143.339	125.869	38.5922	80.4081	39.8508	54.7431	77.1457	7.30312	20.5317	86.3645	21.1636	32.1944
CrematogasterSubCLCMeta_s43484	B	PREDICTED: SID1 transmembrane family member 1-like	NA	534.45	-1.85453	0.369013	-5.02565	5.01718e-07	2.10245e-05	837.943	68.0455	148.03	738.569	665.021	189.311	569.691	517.619	1000.25	1173.34	959.291	181.729	729.144	437.348	287.275
CrematogasterSubCLCMeta_rep_c37574	B	PREDICTED: biorientation of chromosomes in cell division protein 1-like 1	NA	548.476	-1.85351	0.485922	-3.81443	0.0001365	0.00258368	531.497	194.57	122.026	523.952	1072.88	69.8518	589.364	618.277	668.936	674.945	2373.13	548.115	573.777	119.092	282.854
CrematogasterSubCLCMeta_s52674	B	PREDICTED: LOW QUALITY PROTEIN: KAT8 regulatory NSL complex subunit 3	NA	114.544	-1.85297	0.621743	-2.98028	0.00287981	0.030195	134.553	16.7712	145.186	13.1921	69.2354	18.799	264.489	233.306	172.81	203.058	291.917	16.4763	158.818	44.2054	46.9153
[truncated: 3,570 more rows]

## Sheet: B - DE contigs Camp
Contig ID	overexpressed in	BLAST annotation	Gene in Drosophila	mean Base	log 2 Fold Change	lfcSE	stat	p value	adjusted p value	51_PAR_Ca_FB1	53_PAR_Ca_FB1	55_PAR_Ca_FB1	59_PAR_Ca_FB1	63_PAR_Ca_FB2	74_PAR_Ca_FB2	76_PAR_Ca_FB1	77_PAR_Ca_FB2	218_PAT_Ca_FB1	232_PAT_Ca_FB2	240_PAT_Ca_FB2	242_PAT_Ca_FB1
[truncated: 6,153 more rows]
