# Supplementary material
Source: publisher figshare collection journal article supplement (https://gsajournals.figshare.com/articles/dataset/_/14179745)
Supplement: Supplementary file 1 [file 1]

## Supplementary tables for: “Candidate genes involved in cuticular hydrocarbon differentiation between cryptic, parabiotic ant species”

Philipp P. Sprenger, Juliane Hartke, Thomas Schmitt, Florian Menzel, Barbara Feldmeyer

**Table S1: List of colonies sampled.** The table includes the colony ID, species, sampling location and GPS coordinates of the parabiotic colonies collected initially and their experimental usage (RNA = used for RNAseq and transcriptome assembly; CHC = used for chemical analysis).

| Colony ID | Species                  | Location    | GPS                        | Usage                                |
|-----------|--------------------------|-------------|----------------------------|--------------------------------------|
| 063-PAR   | <i>Cr. levior</i> A      | Paracou     | N 05°15.574<br>W 52°55.815 | RNA + CHC                            |
| 064-PAR   | <i>Cr. levior</i> A      | Paracou     | N 05°15.552<br>W 52°55.852 | RNA + CHC                            |
| 075-PAR   | <i>Cr. levior</i> A      | Paracou     | N 05°15.639<br>W 52°56.097 | RNA + CHC                            |
| 077-PAR   | <i>Cr. levior</i> A      | Paracou     | N 05°15.698<br>W 52°55.913 | CHC only; library preparation failed |
| 231-PAT   | <i>Cr. levior</i> A      | Camp Patawa | N 04°31.945<br>W 52°07.391 | RNA only                             |
| 240-PAT   | <i>Cr. levior</i> A      | Camp Patawa | N 04°33.241<br>W 52°09.040 | RNA + CHC                            |
| 242-PAT   | <i>Cr. levior</i> A      | Camp Patawa | N 04°33.281<br>W 52°09.065 | RNA + CHC                            |
| 059-PAR   | <i>Cr. levior</i> B      | Paracou     | N 05°15.344<br>W 52°55.617 | RNA + CHC                            |
| 069-PAR   | <i>Cr. levior</i> B      | Paracou     | N 05°15.503<br>W 52°55.982 | RNA + CHC                            |
| 074-PAR   | <i>Cr. levior</i> B      | Paracou     | N 05°15.578<br>W 52°56.133 | RNA + CHC                            |
| 076-PAR   | <i>Cr. levior</i> B      | Paracou     | N 05°15.698<br>W 52°55.913 | RNA + CHC                            |
| 218-PAT   | <i>Cr. levior</i> B      | Camp Patawa | N 04°32.703<br>W 52°07.991 | RNA only                             |
| 219-PAT   | <i>Cr. levior</i> B      | Camp Patawa | N 04°32.702<br>W 52°07.946 | RNA only                             |
| 222-PAT   | <i>Cr. levior</i> B      | Camp Patawa | N 04°32.687<br>W 52°07.872 | RNA + CHC                            |
| 230-PAT   | <i>Cr. levior</i> B      | Camp Patawa | N 04°31.572<br>W 52°07.107 | RNA + CHC                            |
| 232-PAT   | <i>Cr. levior</i> B      | Camp Patawa | N 04°32.269<br>W 52°07.923 | RNA + CHC                            |
| 045-PAR   | <i>Ca. femoratus</i> PAT | Paracou     | N 05°16.671<br>W 52°55.110 | group dead upon arrival              |
| 051-PAR   | <i>Ca. femoratus</i> PAT | Paracou     | N 05°16.097<br>W 52°55.611 | RNA only                             |
| 059-PAR   | <i>Ca. femoratus</i> PAT | Paracou     | N 05°15.344<br>W 52°55.617 | RNA only                             |
| 077-PAR   | <i>Ca. femoratus</i> PAT | Paracou     | N 05°15.698<br>W 52°55.913 | RNA + CHC                            |
| 218-PAT   | <i>Ca. femoratus</i> PAT | Patawa      | N 04°32.703<br>W 52°07.991 | RNA + CHC                            |
| 232-PAT   | <i>Ca. femoratus</i> PAT | Camp Patawa | N 04°32.269<br>W 52°07.923 | RNA only                             |

|                |                          |             |                            |                                            |
|----------------|--------------------------|-------------|----------------------------|--------------------------------------------|
| <b>240-PAT</b> | <i>Ca. femoratus</i> PAT | Camp Patawa | N 04°33.241<br>W 52°09.040 | RNA only                                   |
| <b>242-PAT</b> | <i>Ca. femoratus</i> PAT | Camp Patawa | N 04°33.281<br>W 52°09.065 | RNA only                                   |
| <b>053-PAR</b> | <i>Ca. femoratus</i> PS  | Paracou     | N 05°16.163<br>W 52°55.447 | RNA + CHC                                  |
| <b>055-PAR</b> | <i>Ca. femoratus</i> PS  | Paracou     | N 05°15.702<br>W 52°55.443 | RNA + CHC                                  |
| <b>063-PAR</b> | <i>Ca. femoratus</i> PS  | Paracou     | N 05°15.574<br>W 52°55.815 | RNA + CHC                                  |
| <b>064-PAR</b> | <i>Ca. femoratus</i> PS  | Paracou     | N 05°15.552<br>W 52°55.852 | CHC only; library preparation failed       |
| <b>066-PAR</b> | <i>Ca. femoratus</i> PS  | Paracou     | N 05°15.865<br>W 52°55.500 | CHC only; removed due to skewed GC content |
| <b>069-PAR</b> | <i>Ca. femoratus</i> PS  | Paracou     | N 05°15.503<br>W 52°55.982 | CHC only; library preparation failed       |
| <b>074-PAR</b> | <i>Ca. femoratus</i> PS  | Paracou     | N 05°15.578<br>W 52°56.133 | RNA + CHC                                  |
| <b>076-PAR</b> | <i>Ca. femoratus</i> PS  | Paracou     | N 05°15.698<br>W 52°55.913 | RNA + CHC                                  |

**Table S2: Overview of all libraries with raw and trimmed read summary statistics.** This table includes accession numbers for NCBI BioSample and NCBI SRA, the number of sequences before and after trimming, the GC content and the total number and percentage of reads that mapped to the de novo transcriptomes.

| Sample ID      | NCBI<br>BioSample<br>Accession | NCBI<br>SRA<br>Accession | Million<br>Seqs<br>before<br>trimming | Million<br>Seqs<br>after<br>trimming | GC<br>content<br>[%] | kallisto<br>mapped<br>reads<br>[millions] | %<br>mapped<br>reads |
|----------------|--------------------------------|--------------------------|---------------------------------------|--------------------------------------|----------------------|-------------------------------------------|----------------------|
| 63-PAR-Cr-FB2  | SAMN11534817                   | SRS4702122               | 20,1                                  | 20,1                                 | 41%                  | 18,822038                                 | 93,64%               |
| 64-PAR-Cr-FB2  | SAMN11534818                   | SRS4702121               | 20,5                                  | 20,5                                 | 40%                  | 18,755198                                 | 91,49%               |
| 75-PAR-Cr-FB1  | SAMN11534819                   | SRS4702120               | 20,3                                  | 20,3                                 | 40%                  | 17,924791                                 | 88,30%               |
| 231-PAT-Cr-FB1 | SAMN11534820                   | SRS4702119               | 20,3                                  | 20,3                                 | 41%                  | 18,640664                                 | 91,83%               |
| 240-PAT-Cr-FB2 | SAMN11534821                   | SRS4702118               | 20,7                                  | 20,7                                 | 41%                  | 18,697558                                 | 90,33%               |
| 242-PAT-Cr-FB2 | SAMN11534822                   | SRS4702117               | 21                                    | 21                                   | 41%                  | 19,155784                                 | 91,22%               |
| 59-PAR-Cr-FB2  | SAMN11534823                   | SRS4702116               | 20,9                                  | 20,9                                 | 40%                  | 19,500576                                 | 93,30%               |
| 69-PAR-Cr-FB2  | SAMN11534824                   | SRS4702115               | 20,9                                  | 20,9                                 | 37%                  | 19,449866                                 | 93,06%               |
| 74-PAR-Cr-FB2  | SAMN11534825                   | SRS4702114               | 20                                    | 20                                   | 40%                  | 18,419325                                 | 92,10%               |
| 76-PAR-Cr-FB2  | SAMN11534826                   | SRS4702113               | 20,3                                  | 20,3                                 | 41%                  | 18,471525                                 | 90,99%               |
| 218-PAT-Cr-FB1 | SAMN11534827                   | SRS4702108               | 20,3                                  | 20,3                                 | 41%                  | 19,199861                                 | 94,58%               |
| 219-PAT-Cr-FB1 | SAMN11534828                   | SRS4702107               | 20,2                                  | 20,2                                 | 41%                  | 19,058833                                 | 94,35%               |
| 222-PAT-Cr-FB2 | SAMN11534829                   | SRS4702106               | 20,7                                  | 20,7                                 | 40%                  | 18,949717                                 | 91,54%               |
| 230-PAT-Cr-FB2 | SAMN11534830                   | SRS4702105               | 20,2                                  | 20,2                                 | 41%                  | 18,76098                                  | 92,88%               |
| 232-PAT-Cr-FB1 | SAMN11534831                   | SRS4702112               | 21                                    | 21                                   | 40%                  | 19,317681                                 | 91,99%               |
| 51-PAR-Ca-FB1  | SAMN11534832                   | SRS4702111               | 20,2                                  | 20,2                                 | 40%                  | 18,825925                                 | 93,20%               |
| 59-PAR-Ca-FB1  | SAMN11534833                   | SRS4702110               | 20,2                                  | 20,2                                 | 40%                  | 18,830403                                 | 93,22%               |
| 77-PAR-Ca-FB2  | SAMN11534834                   | SRS4702109               | 20,2                                  | 20,2                                 | 41%                  | 18,982717                                 | 93,97%               |
| 218-PAT-Ca-FB1 | SAMN11534835                   | SRS4702104               | 20,2                                  | 20,2                                 | 40%                  | 18,851582                                 | 93,32%               |
| 232-PAT-Ca-FB2 | SAMN11534836                   | SRS4702103               | 20,6                                  | 20,6                                 | 39%                  | 19,273274                                 | 93,56%               |
| 240-PAT-Ca-FB2 | SAMN11534837                   | SRS4702128               | 20,1                                  | 20,1                                 | 41%                  | 18,804654                                 | 93,56%               |
| 242-PAT-Ca-FB1 | SAMN11534838                   | SRS4702129               | 20,1                                  | 20,1                                 | 41%                  | 18,73111                                  | 93,19%               |
| 53-PAR-Ca-FB1  | SAMN11534839                   | SRS4702126               | 20                                    | 20                                   | 40%                  | 18,983147                                 | 94,92%               |
| 55-PAR-Ca-FB1  | SAMN11534840                   | SRS4702127               | 20,2                                  | 20,2                                 | 40%                  | 19,153602                                 | 94,82%               |
| 63-PAR-Ca-FB2  | SAMN11534841                   | SRS4702124               | 20,2                                  | 20,1                                 | 40%                  | 18,953337                                 | 94,30%               |
| 74-PAR-Ca-FB2  | SAMN11534842                   | SRS4702125               | 20,3                                  | 20,3                                 | 40%                  | 19,244739                                 | 94,80%               |
| 76-PAR-Ca-FB1  | SAMN11534843                   | SRS4702123               | 20,4                                  | 20,4                                 | 41%                  | 18,873136                                 | 92,52%               |

**Table S3: Sample combination for subassemblies.** The table shows the CLC subassemblies and the samples used for those. Subassemblies were afterwards meta-assembled with MIRA.

| Subassembly                 | Sample IDs                                                         |
|-----------------------------|--------------------------------------------------------------------|
| <i>Cr. levior</i> A #1      | 63-PAR-Cr-FB2<br>64-PAR-Cr-FB2<br>75-PAR-Cr-FB1                    |
| <i>Cr. levior</i> A #2      | 231-PAT-Cr-FB1<br>240-PAT-Cr-FB2<br>242-PAT-Cr-FB2                 |
| <i>Cr. levior</i> B #1      | 59-PAR-Cr-FB2<br>69-PAR-Cr-FB2<br>74-PAR-Cr-FB2                    |
| <i>Cr. levior</i> B #2      | 222-PAT-Cr-FB2<br>230-PAT-Cr-FB2<br>232-PAT-Cr-FB1                 |
| <i>Cr. levior</i> B #3      | 76-PAR-Cr-FB2<br>218-PAT-Cr-FB1<br>219-PAT-Cr-FB1                  |
| <i>Ca. femoratus</i> PAT #1 | 51-PAR-Ca-FB1<br>59-PAR-Ca-FB1<br>218-PAT-Ca-FB1<br>240-PAT-Ca-FB2 |
| <i>Ca. femoratus</i> PAT #2 | 77-PAR-Ca-FB2<br>232-PAT-Ca-FB2<br>242-PAT-Ca-FB1                  |
| <i>Ca. femoratus</i> PS #1  | 53-PAR-Ca-FB1<br>55-PAR-Ca-FB1                                     |
| <i>Ca. femoratus</i> PS #2  | 63-PAR-Ca-FB2<br>74-PAR-Ca-FB2<br>76-PAR-Ca-FB1                    |

**Table S4: Comparison of different assembly strategies using summary stats.** Summary stats for assemblies of cryptic *Crematogaster* species (A) and cryptic *Camponotus* species (B) were created using *TransRate* (Smith-Unna *et al.* 2016).

**A) *Crematogaster* cryptic species**

| assembly                         | N seqs | smallest | largest | N bases   | Mean length | N under 200 | N over 1k | N over 10k | N with orf | Mean orf percent | n90 | n70  | n50  | n30  | n10  | GC    | GC skew | AT skew | Cpg ratio | Bases N | Proportion N | Linguistic Complexity |
|----------------------------------|--------|----------|---------|-----------|-------------|-------------|-----------|------------|------------|------------------|-----|------|------|------|------|-------|---------|---------|-----------|---------|--------------|-----------------------|
| Trinity                          | 253516 | 301      | 26929   | 388095684 | 153085282   | 0           | 113918    | 674        | 98305      | 4244961          | 582 | 1607 | 2764 | 4169 | 6532 | 39429 | 4       | -98     | 240775    | 0       | 0            | 23595                 |
| CLC Workbench only               | 118713 | 145      | 18660   | 72983341  | 61376398    | 631         | 14601     | 80         | 14587      | 5172291          | 256 | 424  | 930  | 2247 | 5097 | 39937 | -152    | -126    | 249175    | 191146  | 262          | 11095                 |
| CLC Workbench + MIRA             | 89286  | 80       | 38254   | 107916751 | 120565401   | 1617        | 25983     | 654        | 42553      | 9720813          | 396 | 1499 | 3063 | 5187 | 9319 | 39778 | 47      | 29      | 244502    | 451191  | 418          | 1781                  |
| final transcriptome (CLC + MIRA) | 60185  | 299      | 38254   | 101019523 | 167848339   | 0           | 25983     | 654        | 42553      | 9829597          | 610 | 1794 | 3328 | 5418 | 9471 | 39741 | 66      | 4       | 244032    | 442237  | 438          | 23917                 |

**B) *Camponotus* cryptic species**

| assembly                         | N seqs | smallest | largest | N bases   | Mean length | N under 200 | N over 1k | N over 10k | N with orf | Mean orf percent | n90 | n70  | n50  | n30  | n10   | GC    | GC skew | AT skew | Cpg ratio | Bases N | Proportion N | Linguistic Complexity |
|----------------------------------|--------|----------|---------|-----------|-------------|-------------|-----------|------------|------------|------------------|-----|------|------|------|-------|-------|---------|---------|-----------|---------|--------------|-----------------------|
| Trinity                          | 228541 | 301      | 24661   | 439174845 | 192164577   | 0           | 120007    | 1725       | 100386     | 4027705          | 784 | 2109 | 3513 | 5255 | 8186  | 38184 | -36     | -71     | 250764    | 0       | 0            | 26827                 |
| CLC Workbench only               | 89456  | 144      | 29106   | 64974968  | 72591701    | 193         | 13342     | 190        | 10991      | 4637211          | 274 | 528  | 1349 | 3136 | 6871  | 3759  | -185    | -94     | 263489    | 100686  | 155          | 12107                 |
| CLC Workbench + MIRA             | 70610  | 80       | 40738   | 87597661  | 123809691   | 1055        | 20323     | 636        | 33600      | 9634579          | 401 | 1552 | 3239 | 5489 | 9968  | 38001 | -47     | -26     | 257468    | 228586  | 261          | 17606                 |
| final transcriptome (CLC + MIRA) | 48208  | 299      | 40738   | 82218009  | 170548475   | 0           | 20323     | 636        | 33600      | 97552            | 608 | 1869 | 3525 | 5715 | 10089 | 38031 | -27     | -16     | 256949    | 225206  | 274          | 23371                 |

**Table S5: List of genes known to be involved in CHC biosynthesis in *Drosophila*.** We list the gene IDs, gene names, (putative) functions and source literature supporting its role in CHC biosynthesis.

| <b>Annotation ID<br/>in <i>Drosophila</i></b> | <b>Gene name</b>                       | <b>Function</b>                                         | <b>Literature</b>                                        |
|-----------------------------------------------|----------------------------------------|---------------------------------------------------------|----------------------------------------------------------|
| CG3524                                        | <i>Fatty acid synthase 2</i>           | Fatty acid synthase                                     | (Chung <i>et al.</i> 2014)                               |
| CG17374                                       | <i>Fatty acid synthase 3</i>           | Fatty acid synthase                                     | (Wicker-Thomas <i>et al.</i> 2015)                       |
| CG16905                                       | <i>Elongase F</i>                      | Very long-chain fatty acid elongase                     | (Chertemps <i>et al.</i> 2007)                           |
| CG2781                                        | <i>ELOVL fatty acid elongase</i>       | Very long-chain fatty acid elongase                     | (Chiang <i>et al.</i> 2016)                              |
| CG6921                                        | <i>bond</i>                            | Very long-chain fatty acid elongase of the Elov1 family | (Ng <i>et al.</i> 2015)                                  |
| CG9458                                        | <i>uncharacterized protein CG9458</i>  | Putative very long-chain fatty acid elongase            | (Dembeck <i>et al.</i> 2015)                             |
| CG18609                                       | <i>uncharacterized protein CG18609</i> | Putative very long-chain fatty acid elongase            | (Dembeck <i>et al.</i> 2015)                             |
| CG30008                                       | <i>uncharacterized protein CG30008</i> | Putative very long-chain fatty acid elongase            | (Dembeck <i>et al.</i> 2015)                             |
| CG5887                                        | <i>Desaturase 1</i>                    | Delta(9)-Desaturase                                     | (Dallerac <i>et al.</i> 2000; Labeur <i>et al.</i> 2002) |
| CG5925                                        | <i>Desaturase 2</i>                    | Delta(9)-Desaturase                                     | (Dallerac <i>et al.</i> 2000)                            |
| CG7923                                        | <i>Desaturase F</i>                    | Delta(9)-Desaturase                                     | (Chertemps <i>et al.</i> 2006)                           |
| CG13091                                       | <i>uncharacterized protein CG13091</i> | Putative acetyl-CoA reductase                           | (Dembeck <i>et al.</i> 2015)                             |
| CG10097                                       | <i>uncharacterized protein CG10097</i> | Putative acetyl-CoA reductase                           | (Dembeck <i>et al.</i> 2015)                             |
| CG17562                                       | <i>uncharacterized protein CG17562</i> | Putative acetyl-CoA reductase                           | (Chiang <i>et al.</i> 2016)                              |
| CG18377                                       | <i>Cyp49a1</i>                         | Putative cytochrome P450                                | (Dembeck <i>et al.</i> 2015)                             |
| CG11466                                       | <i>Cyp9f2</i>                          | Putative cytochrome P450                                | (Dembeck <i>et al.</i> 2015)                             |
| CG9081                                        | <i>Cyp4s3</i>                          | Putative cytochrome P450                                | (Dembeck <i>et al.</i> 2015)                             |
| CG3972                                        | <i>Cyp4g1</i>                          | Cytochrome P450                                         | (Qui <i>et al.</i> 2012)                                 |

## References

- Chertemps, T., L. Duportets, C. Labeur, R. Ueda, K. Takahashi *et al.*, 2007 A female-biased expressed elongase involved in long-chain hydrocarbon biosynthesis and courtship behavior in *Drosophila melanogaster*. *Proc. Natl. Acad. Sci.* 104: 4273–4278.
- Chertemps, T., L. Duportets, C. Labeur, M. Ueyama, and C. Wicker-Thomas, 2006 A female-specific desaturase gene responsible for diene hydrocarbon biosynthesis and courtship behaviour in *Drosophila melanogaster*. *Insect Mol. Biol.* 15: 465–473.
- Chiang, Y. N., K. J. Tan, H. Chung, O. Lavrynenko, A. Shevchenko *et al.*, 2016 Steroid Hormone Signaling Is Essential for Pheromone Production and Oenocyte Survival. *PLoS Genet.* 12: e1006126.
- Chung, H., D. W. Loehlin, H. D. Dufour, K. Vaccaro, J. G. Millar *et al.*, 2014 A Single Gene Affects Both Ecological Divergence and Mate Choice in *Drosophila*. *Science* (80-. ). 343: 1148–1151.
- Dallerac, R., C. Labeur, J. M. Jallon, D. C. Knipple, W. L. Roelofs *et al.*, 2000 A  $\Delta 9$  desaturase gene with a different substrate specificity is responsible for the cuticular diene hydrocarbon polymorphism in *Drosophila melanogaster*. *Proc. Natl. Acad. Sci.* 97: 9449–9454.
- Dembeck, L. M., K. Böröczky, W. Huang, C. Schal, R. R. H. Anholt *et al.*, 2015 Genetic architecture of natural variation in cuticular hydrocarbon composition in *Drosophila melanogaster*. *Elife* 4: e09861.
- Labeur, C., R. Dallerac, and C. Wicker-Thomas, 2002 Involvement of *desat1* gene in the control of *Drosophila melanogaster* pheromone biosynthesis. *Genetica* 114: 269–274.
- Ng, W. C., J. S. R. Chin, K. J. Tan, and J. Y. Yew, 2015 The fatty acid elongase Bond is essential for *Drosophila* sex pheromone synthesis and male fertility. *Nat. Commun.* 6: 8263.
- Qui, Y., C. Tittiger, C. Wicker-Thomas, G. Le Goff, S. Young *et al.*, 2012 An insect-specific P450 oxidative decarbonylase for cuticular hydrocarbon biosynthesis. *Proc. Natl. Acad. Sci.* 109: 14858–14863.
- Smith-Unna, R., C. Boursnell, R. Patro, J. M. Hibberd, and S. Kelly, 2016 TransRate: Reference-free quality assessment of de novo transcriptome assemblies. *Genome Res.* 26: 1134–1144.
- Wicker-Thomas, C., D. Garrido, G. Bontonou, L. Napal, N. Mazuras *et al.*, 2015 Flexible origin of hydrocarbon/pheromone precursors in *Drosophila melanogaster*. *J. Lipid Res.* 56: 2094–2101.
