# Supplementary material
Source: publisher figshare collection journal article supplement (https://gsajournals.figshare.com/articles/dataset/_/14179745)
Supplement: Supplementary file 2 [file 1]

# Supplementary figures for: “Candidate genes involved in cuticular hydrocarbon differentiation between cryptic, parabiocotic ant species”

Philipp P. Sprenger, Juliane Hartke, Thomas Schmitt, Florian Menzel, Barbara Feldmeyer

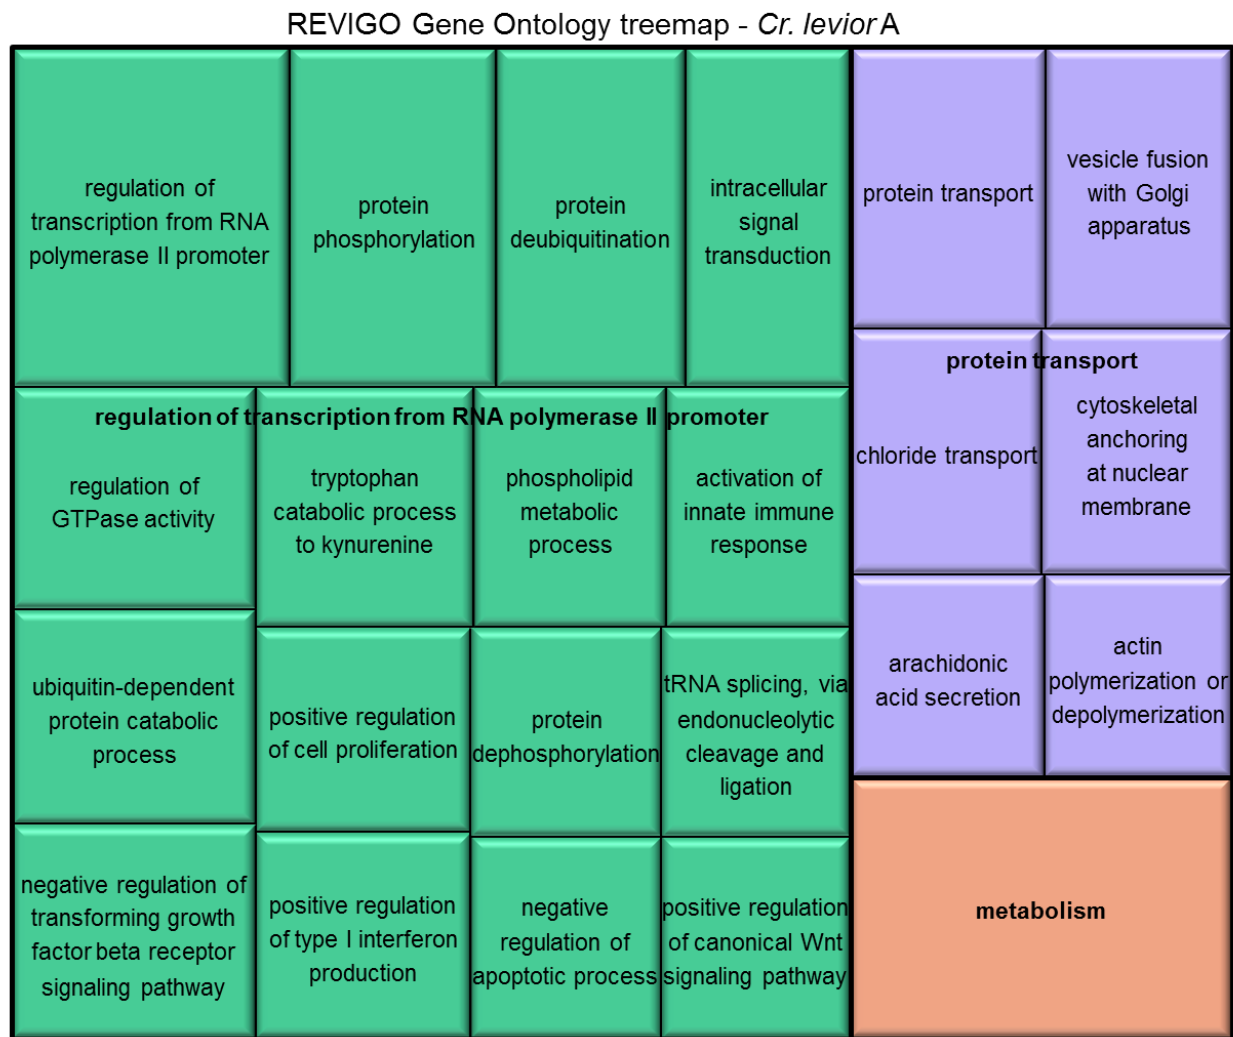

**Figure S1: REVIGO treemap illustrating significantly enriched GO terms in *Crematogaster levior* A.** Significantly enriched GO terms (Fisher-test:  $p < 0.05$ ) of genes upregulated in *Cr. levior* A compared to B. Relative square sizes are scaled to match the degree of overexpression (Supek *et al.* 2011).

REVIGO Gene Ontology treemap - *Cr. levior* B

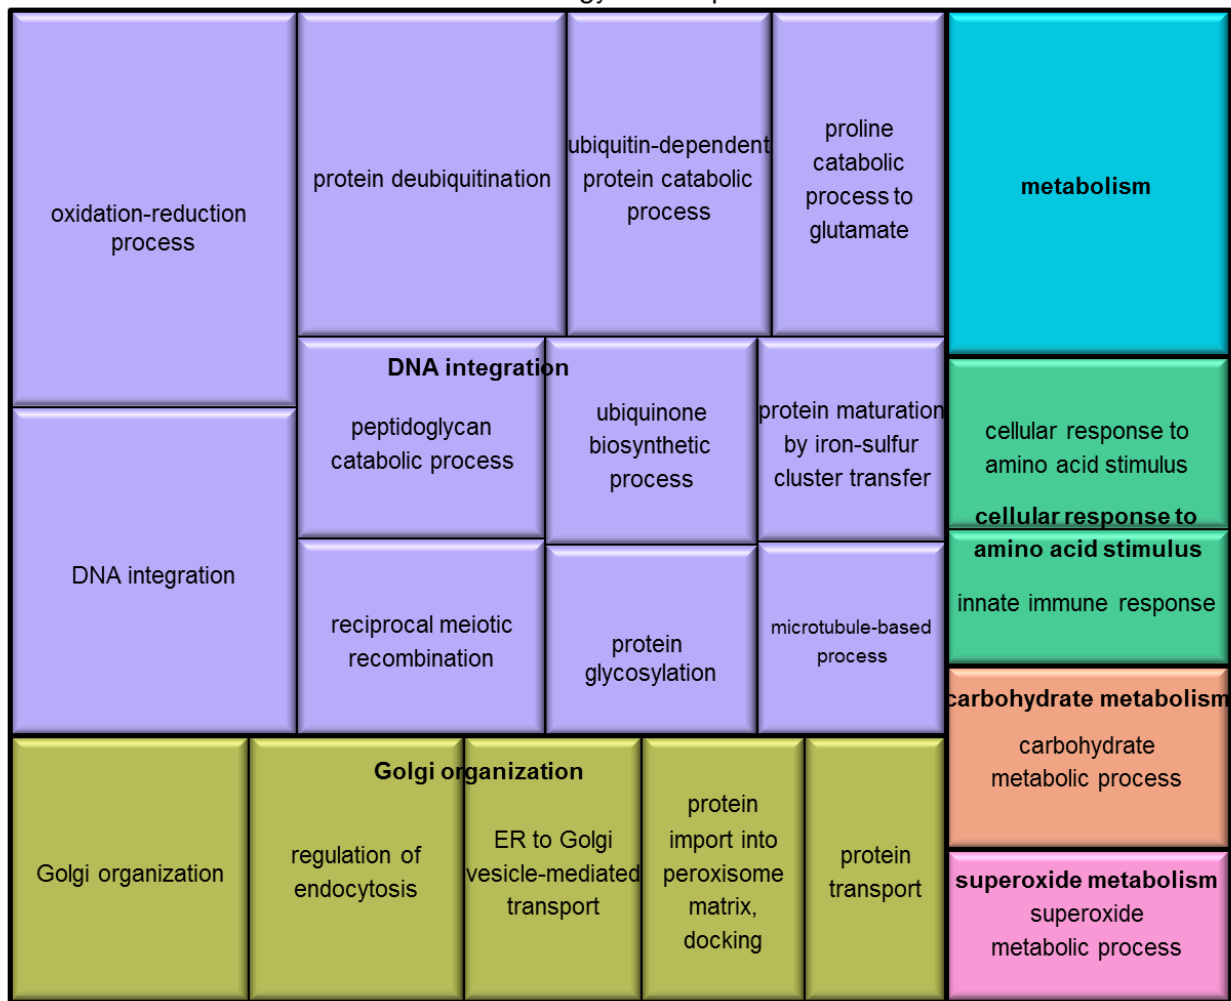

**Figure S2: REVIGO treemap illustrating significantly enriched GO terms in *Crematogaster levior* B.** Significantly enriched GO terms (Fisher-test:  $p < 0.05$ ) of genes upregulated in *Cr. levior* B compared to A. Relative square sizes are scaled to match the degree of overexpression (Supek *et al.* 2011).

REVIGO Gene Ontology treemap - *Ca. femoratus* PAT

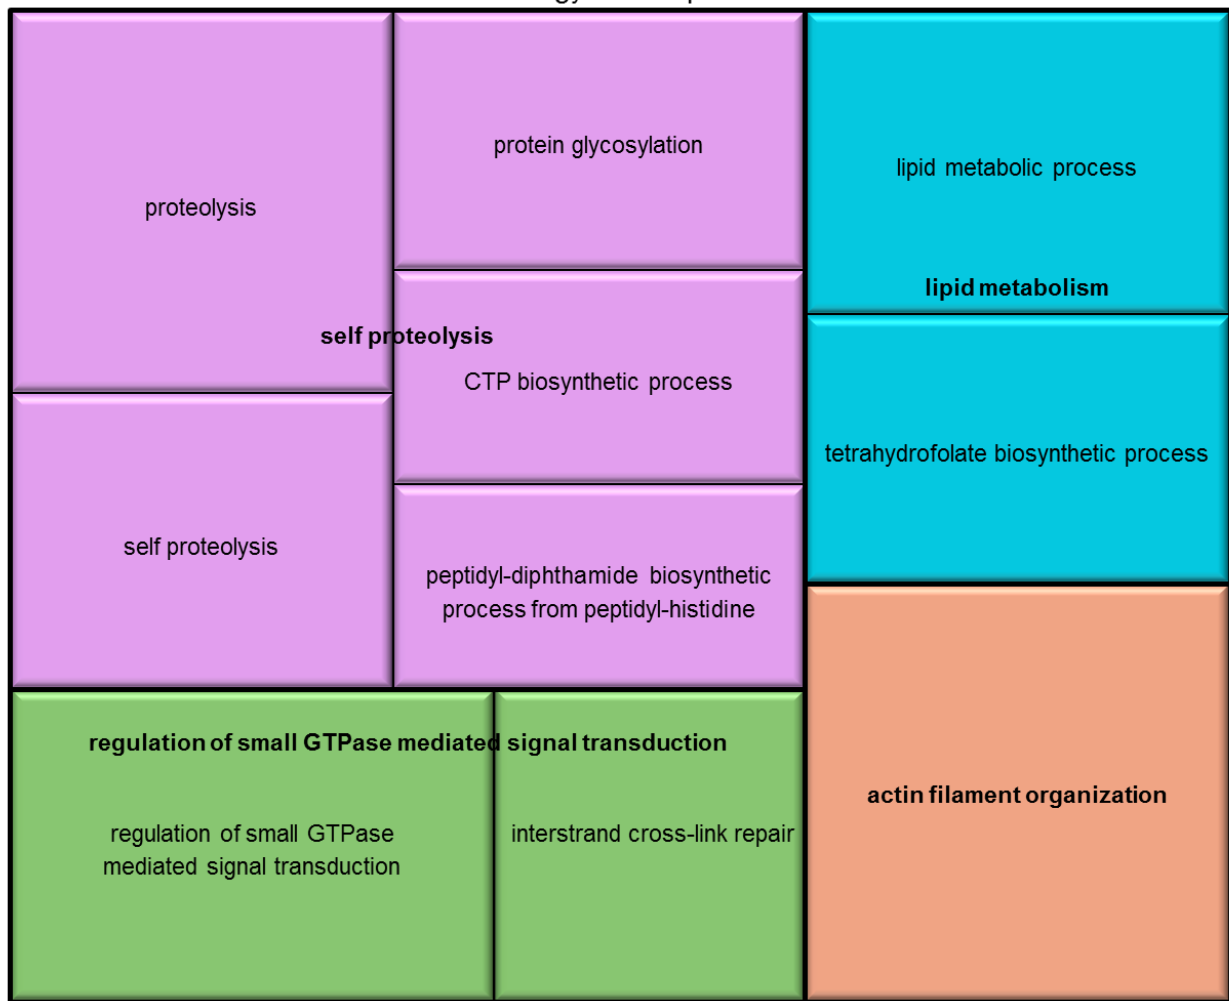

**Figure S3: REVIGO treemap illustrating significantly enriched GO terms in *Camponotus femoratus* PAT.** Significantly enriched GO terms (Fisher-test:  $p < 0.05$ ) of genes upregulated in *Ca. femoratus* PAT compared to PS. Relative square sizes are scaled to match the degree of overexpression (Supek *et al.* 2011).

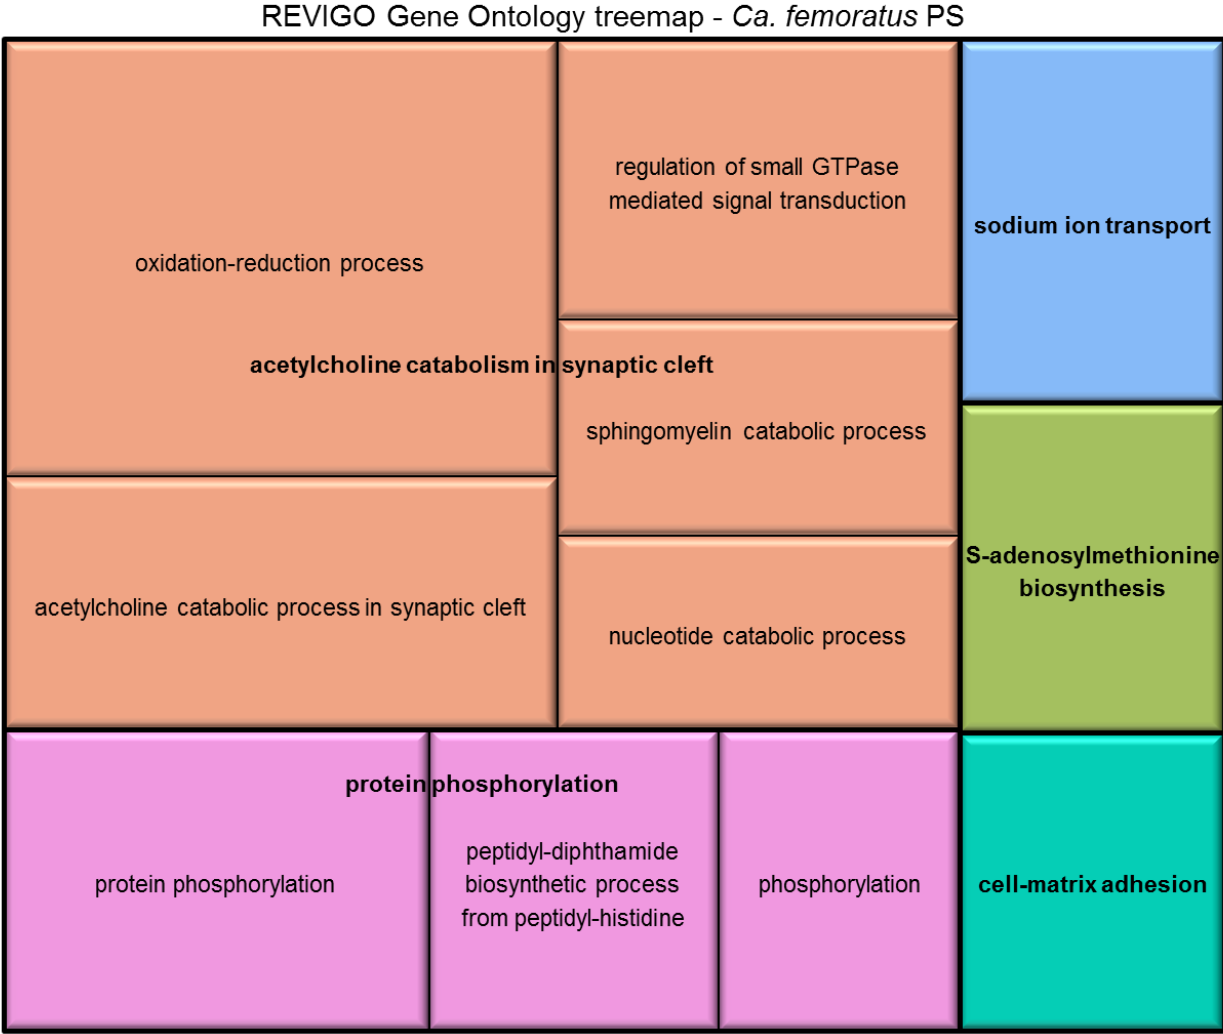

**Figure S4: REVIGO treemap illustrating significantly enriched GO terms in *Camponotus femoratus* PS.** Significantly enriched GO terms (Fisher-test:  $p < 0.05$ ) of genes upregulated in *Ca. femoratus* PS compared to PAT. Relative square sizes are scaled to match the degree of overexpression (Supek *et al.* 2011).
